# Supplementary material for: The transpeptidase PBP2 governs initial localization and activity of the major cell-wall synthesis machinery in E. coli
Source: eLife. 2020 Feb 20;9:e50629. doi: 10.7554/eLife.50629 (PMC7089770; doi:10.7554/eLife.50629)
Supplement: Figure 1—source data 1. — The file Dataset-Fig1.xlsx contains: Figure 1H-I Number of tracks, average diffusion constants, bound and persistent fractions for PAmCherry-PBP2 for native and overexpression conditions, including p-values for bound and persistent fractions. Figure 1F-G Numerical values of the distribution of speeds and orientations of PAmCherry-PBP2 and MreB-msfGFP tracks from low frequency imaging and number of tracks considered. Figure 1—figure supplement 1B-C. Width, length and doubling times obtained from OD600 measurements of MG1655, TKL130, and TKL130/pKC128 cells. Figure 1—figure supplement 1D Bocillin labeling, fluorescence and mass spectrometry measurements of MG1655, TKL130, and TKL130/pKC128 cells. Figure 1—figure supplement 2 Values of bound fractions, average diffusion constants, and sum of residuals of PAmCherry-PBP2 tracks from TKL130/pKC128 strain with high frequency imaging given by the Spot-On method using 2- or 3-state diffusion model. Figure 1—figure supplement 3 Values of bound fractions and diffusion constants of PAmCherry-PBP2 tracks from TKL130/pKC128 strain to compare the results from Spot-On with the Deff based method. Figure 1—figure supplement 5 Raw data for Figure 1F–G. List of velocity, orientation and goodness of fit (R2). Figure 1—figure supplement 7 Number of bound or active PBP2 molecules as a function of the number of PBP2 molecules per cell acquired from mass spectrometry and fluorescence measurements. Figure 1—figure supplement 8A) Shape and OD600 measurements of cells carrying the msfGFP-PBP2 fusion expressed from the native or PLac promoters with different induction levels of IPTG. Figure 1—figure supplement 8B Fluorescence and Western Blot quantifications and mass spectrometry (both DIA and PRM) of cells carrying the msfGFP-PBP2 fusion expressed from the native or PLac promoters with different induction levels of IPTG Figure 1—figure supplement 8C Values of number of tracks, average diffusion constants, and bound fractions for cells carrying [file elife-50629-fig1-data1.xlsx]

## Sheet: Panel H-I
Panel H: TKL130		Diffusion constants [um^2/s]		Population sizes
Fast tracking	Number of tracks	D1	D2	F0	F1	F2	chi2
	912	0.00713961	0.046562	21.8787	12.5187	65.6026	0.168309
	2228	0.0125827	0.0518342	18.2863	24.5255	57.1882	0.045237
	826	0.0132346	0.0586266	25.7848	18.5988	55.6164	0.137226
	1724	0.014699	0.0526022	19.7958	29.5651	50.6392	0.0527197
	2538	0.0160925	0.0543901	22.4749	26.8499	50.6753	0.0388934
	1861	0.0232931	0.0652257	23.8523	32.6234	43.5244	0.0848676
Slow tracking	Number of tracks	Persistent fraction [%]
	109	42.0886
	83	43.318
	99	41.2162
Panel I: Overexpression
		Diffusion constants [um^2/s]		Population sizes
Fast tracking	Number of tracks	D1	D2	F0	F1	F2	chi2
	2814	0.00756905	0.0327323	12.7568	30.2058	57.0374	0.027439
	2908	0.00894883	0.035099	10.9706	28.3385	60.6909	0.0217624	p-value bound fraction*
	2805	0.00657374	0.0309056	13.1145	24.6082	62.2773	0.0219674	0.000657139
Slow tracking	Number of tracks	Persistent fraction [%]	p-value persistent fraction*
	182	45.6332
	111	50.5226
	81	47.39	0.0221829
* p-value calculated according to two-lobed t-test with respect to TKL130

## Sheet: Panel F-G
	Bin centers	Frequency	Frequency
Velocity Distribution	[nm/s]	TKL130	NO53		Strain	Number of tracks
	1.5	0	0		TKL130	259
	4.5	0.0348837	0.0494673		NO53	1315
	7.5	0.0775194	0.114916
	10.5	0.143411	0.149163
	13.5	0.162791	0.160578
	16.5	0.155039	0.144597
	19.5	0.143411	0.126332
	22.5	0.0891473	0.0936073
	25.5	0.0465116	0.0593607
	28.5	0.0542636	0.0502283
	31.5	0.0348837	0.0235921
	34.5	0.00387597	0.0152207
	37.5	0.0155039	0.00684932
	40.5	0.00775194	0.00152207
	43.5	0.00775194	0.00152207
	46.5	0.00387597	0.00152207
	Bin centers	Frequency	Frequency
Orientation Distribution		TKL130	NO53		Strain	Number of tracks
	10	0	0.0334855		TKL130	35
	30	0.0606061	0.0273973		NO53	1315
	50	0.030303	0.0677321
	70	0.121212	0.150685
	90	0.424242	0.352359
	110	0.272727	0.225266
	130	0.030303	0.0791476
	150	0.030303	0.0350076
	170	0.030303	0.0289193

## Sheet: SI 1
Panels A-B-C		Width [um]	Length [um]	Doubling time [min]
	MG1655	0.949039	3.4354	71.33
	MG1655	0.943896	3.46895	65.34
	MG1655	0.924156	3.36883	-
	MG1655	0.970409	3.19182	-
	TKL130	1.0199	3.1393	65.7635
	TKL130	1.05032	3.33269	78.8115
	TKL130	1.0916	3.4699	76.5856
	TKL130	1.03932	3.04603	74.2077
	TKL130	1.01341	3.00378	71.8983
	TKL130	1.01704	3.22306	75.1735
	Overexpression	1.148	2.8291	79.917
	Overexpression	1.01605	2.94063	98.0406
	Overexpression	1.03267	2.90281	-
Panel D		Bocillin labeling	Fluorescence	Mass Spec (DIA)	Mass Spec (PRM)
		PBP2 fold change*	PBP2 fold change*	PBP2 fold change*	PBP2 levels**
	MG1655	1.07827	-	0.611202	213
	MG1655	1.19093	-	0.55366	-
	MG1655	-	-	0.718115	-
	TKL130	0.819312	1.0494	0.945543	475.5
	TKL130	1.18069	0.95058	1.02219	394.5
	TKL130	-	-	1.03227	-
	Overexpression	3.88588	2.8989	5.4859	2805
	Overexpression	1.86394	-	5.10133	3252
	Overexpression	-	-	6.6277	-
* normalized with respect to average measurement of TKL130
** Absolute numbers of proteins per cell

## Sheet: SI 2
	2-state					3-state								4-state
Strain	D0	D1	F0	F1	chi2	D0	D1	D2	F0	F1	F2	NB	chi2	chi2
TKL130	6.49032e-11	0.0398486	26.6677	73.3323	0.197535	2.40412e-11	0.00714206	0.046564	21.8798	12.5202	65.6001	912	0.168309	0.164226
	0.000210532	0.0373103	23.2475	76.7525	0.0874238	8.90387e-06	0.0126564	0.0519106	18.3029	24.6137	57.0834	2228	0.0452338	0.0437291
	4.7552e-09	0.0444773	29.8929	70.1071	0.167909	4.90091e-10	0.0132351	0.0586272	25.7849	18.5994	55.6157	826	0.137226	0.135227
	0.000148137	0.0350034	24.0288	75.9712	0.0910186	3.25712e-09	0.0146995	0.052603	19.7959	29.5661	50.6381	1724	0.0527197	0.0496889
	0.000103272	0.0376056	25.8835	74.1165	0.0680831	5.41029e-06	0.0161487	0.0544561	22.4818	26.9361	50.5821	2538	0.0388919	0.0374693
	2.68634e-10	0.0425491	26.0226	73.9774	0.104501	3.92219e-10	0.0232761	0.0651919	23.8509	32.5851	43.564	1861	0.0848676	0.0832008
TKL130/pKC128	0.000912054	0.0239822	22.2486	77.7514	0.0690947	0.000166384	0.00869169	0.0341629	13.5874	32.4173	53.9953	4251	0.026819	0.0243586
	0.00094985	0.0264615	18.6025	81.3975	0.0542979	0.000270021	0.0107859	0.0371923	11.8534	32.0948	56.0518	4295	0.0205408	0.0191815
	0.000772297	0.0243653	21.9783	78.0217	0.055692	0.000219246	0.00807328	0.0323228	14.2492	26.782	58.9687	4263	0.0206707	0.0194701

## Sheet: SI 3
	D_eff based method		Spot-On
TKL130	D1	F0	D1	F0
Replicate 1	0.0375	19.26	0.0398486	26.6677
Replicate 2	0.0375	16.01	0.0373103	23.2475
Replicate 3	0.04	20.76	0.0444773	29.8929
Replicate 4	0.0375	19.3	0.0350034	24.0288
Replicate 5	0.0375	19.63	0.0376056	25.8835
Replicate 6	0.04	18.45	0.0425491	26.0226

## Sheet: SI 5
												Number of tracks:
PBP2			MreB			PBP2			MreB
Velocity [nm/s]	R^2		Velocity [nm/s]	R^2		Angle	R^2		Angle	R^2			Velocity	Orientation
2.89406	0.555653		15.8065	0.978474		93.8793	0.987756		123.314	0.978474		PBP2	2389	106
3.16228	-4.21228		5.53094	0.702505		146.518	0.190414		104.938	0.702505		MreB	2264	2264
7.67533	0.395096		15.187	0.982629		34.0533	-0.191229		111.594	0.982629
2.43299	0.0788875		15.6369	0.998989		113.942	-0.293887		118.028	0.998989
3.16228	-1.88297		2.63801	0.0713993		59.785	0.978296		19.4234	0.0713993
4.59706	0.553885		19.6039	0.996502		21.7465	-0.864206		99.6842	0.996502
6.66993	0.879643		10.5843	0.941749		100.379	0.950272		29.0403	0.941749
3.72051	0.927868		3.50269	-0.199808		42.796	-0.249214		30.9844	-0.199808
13.721	0.613683		7.05881	0.867145		66.2377	0.860475		112.017	0.867145
0.0094731	-0.00884664		13.3267	0.976915		8.56272	0.945214		87.8114	0.976915
4.72532	0.560929		22.786	0.983634		177.809	0.633145		108.026	0.983634
22.5817	0.99189		22.4862	0.994066		88.7493	0.966621		132.33	0.994066
14.46	0.799165		14.1293	0.980938		81.1313	0.971212		94.1682	0.980938
9.8462	0.961342		20.1093	0.949596		6.14766	0.245114		90.1901	0.949596
0.00796419	-4.22451e-05		4.69985	0.719427		59.2061	-0.000360919		109.881	0.719427
0.00495994	-0.0010813		16.4034	0.965969		50.0865	0.182336		89.154	0.965969
2.33754	-2.74506		14.0365	0.978942		118.949	0.978974		82.097	0.978942
6.0312	0.512041		6.90036	0.128533		80.8104	-1.56449		112.7	0.128533
3.16228	-0.956956		1.29531	-0.0287744		43.0378	0.160881		98.3264	-0.0287744
5.96437	0.0605746		16.9448	0.978997		91.5631	0.987959		85.2572	0.978997
0.000156514	-0.00099461		21.1088	0.886104		169.171	0.707992		179.222	0.886104
1.19586	-0.0365096		15.6048	0.982804		61.5876	-0.135464		87.1951	0.982804
10.9395	0.653682		13.5681	0.999059		49.4998	0.807291		71.3408	0.999059
16.8746	0.480379		17.0722	0.886613		97.9535	0.997854		115.426	0.886613
4.71817	0.0106935		16.8316	0.996336		91.5537	0.992508		103.985	0.996336
18.3152	0.8477		20.8761	0.997613		115.297	0.000374654		58.6637	0.997613
0.000153116	-0.000486239		4.77736	-0.103507		132.035	-0.382684		NaN	-0.103507
2.15969	0.0942832		9.98933	0.983743		134.828	-0.148805		100.116	0.983743
7.73113	0.666727		15.9382	0.991255		176.45	-0.00764151		74.0984	0.991255
0.000150722	-0.00784321		3.16228	-1.28378		71.8638	0.691156		132.803	-1.28378
0.0851806	-0.766557		18.1979	0.96613		86.2638	-3.29828		94.212	0.96613
2.60078	-0.0328835		11.4475	0.996179		5.25808	0.87503		110.593	0.996179
16.9003	0.980925		25.0661	0.82932		24.3446	-0.0582628		107.623	0.82932
20.5155	0.777758		2.41037	-9.5465		113.068	-0.873299		105.333	-9.5465
8.95809	0.959282		12.7272	0.983742		105.079	0.302002		99.4935	0.983742
18.6911	0.98306		6.51781	0.836255		95.1002	0.989979		65.0175	0.836255
8.08425	-0.00352063		25.6284	0.998741		100.067	0.995753		91.1696	0.998741
15.5625	0.982175		17.9811	0.943078		77.7445	0.711729		93.9065	0.943078
0.0105687	-0.000515784		1.67584	-20.8884		75.8207	0.988335		43.4043	-20.8884
1.23134	-0.0902306		9.66389	0.830202		32.1233	0.858709		28.9095	0.830202
9.80634	0.342359		2.34918	-6.22163		69.1935	-0.0826323		56.7442	-6.22163
11.6888	0.498945		18.4789	0.99929		36.9311	0.993456		82.0925	0.99929
0.000150405	-0.0028164		14.7383	0.976155		85.3715	0.993754		63.531	0.976155
0.99932	-0.0103172		3.16228	0.426515		24.3564	-0.151183		120.179	0.426515
0.00547448	-0.0672295		11.1295	0.96184		154.467	-1.92359		95.5272	0.96184
14.6911	0.592444		17.0118	0.995341		165.363	0.530986		86.3077	0.995341
4.01291	-0.512641		12.7019	0.996553		144.15	0.424911		99.9214	0.996553
3.14775	0.00214173		6.82266	0.897202		48.0859	0.644625		123.196	0.897202
7.25156	0.505273		14.8124	0.993401		3.17901	0.843041		86.3737	0.993401
14.8949	0.916511		12.6415	0.813377		21.9938	-1.13525		88.7495	0.813377
0.534405	-0.0188681		5.39225	0.951618		82.2502	0.969342		148.286	0.951618
0.0086476	-0.106049		21.4651	0.996506		78.4195	0.779289		93.6923	0.996506
2.27186	-0.104198		6.03635	0.96605		74.2879	0.965022		156.768	0.96605
12.836	0.108151		6.3806	0.976964		101.215	0.930083		92.3282	0.976964
11.1543	0.875822		10.347	0.974615		110.605	0.155241		82.016	0.974615
2.2894	-3.77665		11.9098	0.995297		72.762	0.786158		107.684	0.995297
1.71671	-0.0730623		16.4639	0.97045		65.3894	-1.03357		71.3696	0.97045
0.00354065	-0.000691527		3.16228	-0.200824		60.7772	-0.323254		76.6652	-0.200824
2.38431	-3.82129		3.30392	0.836027		154.617	-0.0180136		111.27	0.836027
2.39827	-0.572102		4.34821	0.759132		94.3523	0.507806		80.8033	0.759132
16.1291	0.340768		16.7945	0.958354		33.8534	0.932631		140.821	0.958354
4.0084	-0.0386507		21.555	0.995409		117.022	0.215798		91.5588	0.995409
0.0979012	-0.000519249		2.79051	0.36288		40.316	0.779474		139.198	0.36288
7.35459	0.473359		8.6517	0.826793		155.067	0.471472		18.6037	0.826793
0.00531504	-0.0233248		2.4816	-1.38592		167.751	0.752537		73.8752	-1.38592
15.942	0.488117		17.9594	0.967651		106.186	-0.0186297		87.1897	0.967651
2.58388	0.00514512		15.8874	0.992825		13.1203	-0.607949		139.778	0.992825
12.1885	0.483619		8.20206	0.881147		119.191	-0.105172		59.6501	0.881147
6.59099	0.287554		3.16608	0.681782		29.7901	-0.0855002		120.763	0.681782
11.0905	0.227786		21.87	0.928714		16.6126	-0.00732627		105.677	0.928714
6.00868	0.433314		18.6328	0.995123		84.6964	0.993239		101.854	0.995123
0.00358887	-0.0599921		1.8112	0.0476303		95.4258	0.98275		138.825	0.0476303
2.36425	-3.54884		8.74716	0.73535		100.584	0.937702		116.849	0.73535
10.6432	0.603749		6.08523	0.835683		100.661	0.993585		87.6959	0.835683
0.000170467	-0.00840412		0.00879297	-9.19854e-07		61.2617	-7.61943		28.4433	-9.19854e-07
3.8637	-0.321601		3.37247	0.399516		91.8673	0.937393		106.752	0.399516
17.2802	-1.93685		6.14377	0.587198		89.3347	0.97155		118.107	0.587198
0.000155836	-0.00247775		7.44069	0.562141		71.2892	0.982024		154.922	0.562141
3.16228	-1.04231		26.2362	0.822728		169.763	0.928299		77.8866	0.822728
5.92291	0.729353		21.611	0.978893		66.531	0.811224		100.302	0.978893
7.37441	0.493807		17.264	0.948308		121.463	0.67611		125.041	0.948308
21.0238	0.865751		2.58818	-0.0209609		73.3082	-1.09221		65.8546	-0.0209609
10.6845	0.85865		2.50281	-1.16178		110.288	0.814648		75.6506	-1.16178
0.00759781	-0.000420945		2.47594	-0.459492		10.5654	-0.825763		76.3431	-0.459492
3.16228	-0.599643		15.6501	0.914047		118.112	-0.00983281		155.358	0.914047
2.83855	0.0289555		9.86983	0.988348		105.932	0.99459		57.2485	0.988348
3.16228	-26.2426		5.22077	0.840401		157.085	0.90623		121.901	0.840401
3.16228	-0.862115		3.16228	-0.774813		159.225	0.877402		39.7049	-0.774813
5.43529	0.942526		19.5755	0.760631		70.0614	0.881603		94.5301	0.760631
2.73368	-0.171856		15.2023	0.998431		102.012	0.97508		131.359	0.998431
10.881	0.736856		3.48403	0.875301		134.281	-0.00282991		141.249	0.875301
0.150722	-0.499484		15.9578	0.991224		9.80994	0.870185		108.103	0.991224
3.46112	-0.222235		30.2691	0.995739		138.27	0.999199		66.7859	0.995739
2.97432	-0.0687247		17.318	0.989316		102.666	0.86453		88.6547	0.989316
5.51106	0.0389453		11.3976	0.970288		123.723	-0.954688		107.985	0.970288
0.119701	-0.462322		21.1796	0.981453		106.636	0.916075		157.702	0.981453
6.51822	0.419787		9.8895	0.967111		92.3135	0.957425		69.7409	0.967111
8.6752	0.46119		15.5758	0.972085		160.567	0.0173348		101.08	0.972085
8.34486	0.334813		2.33023	-1.23251		35.9875	-0.510812		NaN	-1.23251
3.92725	0.34923		16.9891	0.795338		15.8205	0.295731		98.3443	0.795338
16.0513	0.758811		16.411	0.995046		114.676	-1.6494		69.4186	0.995046
7.16333	0.2983		22.3372	0.976698		59.0852	0.966293		124.329	0.976698
4.84173	0.923131		7.29265	0.710246		40.8621	0.265015		44.9761	0.710246
3.16228	-0.718934		1.31802	-0.0765255		166.556	-0.00831244		143.456	-0.0765255
0.00304962	-0.00443731		15.6243	0.980769		91.4697	0.893903		76.4994	0.980769
12.6283	0.576972		20.1555	0.995267		61.4506	0.963972		90.0327	0.995267
2.14378	-0.670694		14.1422	0.990418					94.2913	0.990418
2.58566	-0.231589		0.000149386	-0.000467511					98.5334	-0.000467511
1.06261	-0.032404		22.1547	0.971431					104.617	0.971431
4.79602	0.468955		7.79155	0.797002					134.934	0.797002
19.2281	0.932892		16.2436	0.974434					89.8992	0.974434
19.8897	0.741967		3.44662	0.709491					54.812	0.709491
0.0697331	-0.126893		11.2639	0.844756					45.4515	0.844756
6.6851	0.692659		11.5049	0.718852					116.779	0.718852
0.0714797	-0.559655		0.0501644	-0.0249131					103.122	-0.0249131
14.4416	0.963997		23.4537	0.995425					115.159	0.995425
0.835611	-0.00156816		6.57077	0.315901					114.894	0.315901
11.5151	0.723356		4.92712	0.923071					64.1136	0.923071
8.43805	0.56857		19.7814	0.997688					83.838	0.997688
13.2303	0.992653		12.265	0.894275					95.0521	0.894275
0.00885559	-0.130313		18.0877	0.975437					114.83	0.975437
2.20547	0.127548		17.8233	0.959189					111.541	0.959189
4.933	0.224908		2.71459	0.465781					141.85	0.465781
24.4362	0.981628		33.6842	0.970624					73.9192	0.970624
3.1654	-0.00195086		18.781	0.963658					93.6829	0.963658
13.5054	0.798631		3.16228	-2.99271					NaN	-2.99271
0.00344234	-0.0119808		2.29216	0.201813					158.8	0.201813
22.2378	0.890567		5.85122	0.917481					38.2893	0.917481
4.07635	0.550457		2.3375	-5.95465					162.698	-5.95465
0.860628	-0.00749679		2.41152	-16.1712					2.46282	-16.1712
25.4273	0.737398		13.6768	0.999033					24.4859	0.999033
9.18593	-0.804888		2.6373	0.357552					92.7712	0.357552
2.37447	-0.189915		24.1037	0.998147					52.6862	0.998147
2.13671	-0.0466973		2.23607	#NAME?					NaN	#NAME?
1.81523	-0.00775476		32.1469	0.986753					44.903	0.986753
0.0603923	-0.179914		27.7892	0.996698					79.1048	0.996698
0.00238907	-1.34573e-05		2.91438	0.11387					63.9961	0.11387
17.5331	0.872803		18.0567	0.92783					79.8394	0.92783
9.15093	0.878056		2.23607	#NAME?					NaN	#NAME?
0.00879136	-0.00237232		2.33703	-13.3807					2.46282	-13.3807
8.86286	0.923372		18.0361	0.99555					98.3609	0.99555
5.38223	0.122546		15.8074	0.945429					9.77396	0.945429
25.4274	0.965698		5.84365	0.512242					44.1169	0.512242
13.8253	0.888545		8.23997	0.969886					9.52276	0.969886
5.17422	-0.814804		2.51333	-0.730218					14.1173	-0.730218
5.67942	0.0877174		7.5216	0.954491					97.1088	0.954491
0.231811	-0.576727		12.2752	0.925193					103.45	0.925193
4.35219	-0.00178271		6.08701	0.805601					112.052	0.805601
23.308	0.905947		0.0245419	-0.317439					2.46282	-0.317439
3.56881	-0.312411		15.4616	0.980431					50.4571	0.980431
21.447	0.791974		14.4429	0.903314					73.8668	0.903314
4.9692	-1.02409		3.16228	-0.122038					3.98752	-0.122038
13.5746	-0.937057		24.1205	0.986841					91.5169	0.986841
4.41075	-0.431036		5.33987	0.990852					45.3379	0.990852
10.5162	0.540129		12.6657	0.987952					77.8948	0.987952
4.37693	-0.854129		31.5269	0.997351					77.9971	0.997351
8.17088	0.344573		1.35509	-0.069498					49.3819	-0.069498
0.0889712	-0.37125		19.7881	0.988185					88.6487	0.988185
16.3316	0.867685		3.91299	0.643718					90.1177	0.643718
8.80024	0.903483		10.103	0.991963					67.4254	0.991963
3.0569	-0.659478		8.33761	0.976033					133.042	0.976033
0.0893129	-0.502254		17.9977	0.996606					47.1098	0.996606
12.4984	0.968464		6.42044	0.995027					104.352	0.995027
3.44701	0.0383657		13.1008	0.99906					134.589	0.99906
0.00931583	-0.00139118		7.64014	0.990169					91.5081	0.990169
3.16228	-2.92238		28.8756	0.966904					78.4518	0.966904
0.0500788	-0.505113		11.4817	0.90789					142.873	0.90789
3.16228	-1.61714		2.37061	-1.11049					NaN	-1.11049
17.3594	0.791179		3.34416	0.341354					105.631	0.341354
23.3314	0.978438		5.43888	-0.399699					89.9065	-0.399699
20.4225	0.671035		24.2258	0.969305					83.6522	0.969305
1.17112	-0.0124859		12.1429	0.954176					105.443	0.954176
0.00499381	-0.00427638		21.277	0.992347					93.0527	0.992347
6.81633	-0.19084		4.15279	0.502615					75.8703	0.502615
31.8094	0.949295		5.37187	0.59312					124.19	0.59312
5.33474	0.800745		17.4115	0.965713					87.9354	0.965713
3.16228	-0.707516		3.01108	0.590323					96.2224	0.590323
3.16228	-1.69756		8.62322	0.762983					168.384	0.762983
2.03961	-0.394973		9.04029	0.949391					163.306	0.949391
2.95064	-0.259993		2.28599	-0.2253					105.518	-0.2253
1.25164	-0.0243969		3.16228	0.0212278					14.9495	0.0212278
2.25341	-0.0670547		9.25389	0.982282					70.8632	0.982282
0.154175	-0.680569		2.65594	0.113863					65.3155	0.113863
10.47	0.922228		0.000155904	-0.00284459					167.582	-0.00284459
11.5746	0.532923		3.98824	0.914618					132.18	0.914618
12.8589	-0.102459		13.8574	0.960603					90.3715	0.960603
2.32071	-0.379911		2.36674	-21.1871					1.69815	-21.1871
12.3608	0.921573		16.7319	0.985568					98.4246	0.985568
24.4316	0.760407		6.5136	0.871523					107.47	0.871523
17.292	0.398664		24.7633	0.997072					109.827	0.997072
0.00471932	-0.00231927		13.1999	0.726254					107.967	0.726254
4.89821	0.815691		12.0409	0.985791					65.7507	0.985791
3.16228	-2.37769		2.34282	-3.92326					76.9331	-3.92326
12.5362	0.866671		18.0854	0.998014					45.1465	0.998014
3.58991	0.149031		12.0367	0.988343					7.30084	0.988343
12.2123	0.546591		28.4267	0.915815					18.5177	0.915815
6.52856	0.397044		2.30874	-28.4656					53.7775	-28.4656
17.8545	0.978918		4.90775	0.960031					49.3852	0.960031
17.1408	0.939066		0.0309672	-0.0240075					63.9839	-0.0240075
9.64892	0.757676		9.97798	0.98703					70.6143	0.98703
18.8645	-0.2889		6.87063	0.931169					124.469	0.931169
5.22634	0.729578		4.6291	0.934033					85.4047	0.934033
10.9061	0.46605		16.1593	0.987701					101.08	0.987701
0.00462123	-0.0119206		21.3772	0.997846					93.0862	0.997846
0.0613551	-0.332155		12.5905	0.98324					95.1423	0.98324
3.16228	-0.660145		8.62143	0.945299					37.8321	0.945299
7.99741	0.120555		16.5746	0.980112					98.4909	0.980112
0.349815	-0.980955		2.24388	-113.51					NaN	-113.51
5.26154	-0.730791		16.948	0.997553					61.8876	0.997553
18.2052	0.624241		23.4469	0.996325					92.8077	0.996325
1.58598	-0.014577		2.34013	-2.99841					174.268	-2.99841
0.0103127	-0.0947976		11.6397	0.995478					93.8387	0.995478
4.51205	-0.286077		13.9461	0.874281					59.0697	0.874281
5.7188	0.282133		24.2676	0.967766					102.264	0.967766
3.16228	-3.00396		5.81915	0.906864					102.703	0.906864
3.16228	-111.013		5.74107	0.825622					128.416	0.825622
0.0323753	-0.485932		16.5217	0.976652					92.6527	0.976652
0.00706949	-0.0101586		16.8592	0.992204					95.9396	0.992204
3.16228	-1.2336		19.8242	0.990819					117.99	0.990819
18.076	0.642684		2.75306	0.353852					18.9839	0.353852
12.9976	-0.577568		2.3883	-9.34847					7.86494	-9.34847
6.5702	0.775828		4.12612	0.907903					90.114	0.907903
4.5588	0.176522		7.11681	0.771855					112.132	0.771855
6.39466	0.759682		14.2446	0.995905					104.345	0.995905
14.0146	0.823007		29.1126	0.997713					95.7592	0.997713
3.7998	0.707585		10.9366	0.927637					78.3283	0.927637
5.98646	0.63082		18.1422	0.93798					101.465	0.93798
6.35175	-1.35049		32.1547	0.852925					89.3726	0.852925
28.6177	0.967331		2.33204	-20.7057					105.766	-20.7057
17.8784	0.363126		8.07073	0.997635					115.242	0.997635
6.53311	-1.16823		24.6457	0.995139					84.285	0.995139
3.16228	-0.305714		3.26875	0.0228307					139.087	0.0228307
0.0683266	-0.432043		15.6942	0.944353					173.461	0.944353
7.22411	0.639985		18.6846	0.980005					86.5283	0.980005
3.89801	0.0218386		3.16228	-2.88602					128.888	-2.88602
4.52529	0.428249		10.1717	0.995151					63.6992	0.995151
2.53298	-0.771174		1.97294	-0.234699					NaN	-0.234699
1.27111	-0.000286356		1.20863	-0.0401223					135.462	-0.0401223
16.2687	0.925594		9.97577	0.90157					94.8417	0.90157
2.94913	-0.135335		19.9574	0.980687					68.2356	0.980687
3.19162	-0.0120784		16.7477	0.973269					29.8227	0.973269
0.000159306	-0.0266954		4.19206	0.939623					59.3347	0.939623
3.16228	-1.19767		11.9953	0.984904					64.6152	0.984904
9.33718	0.951477		23.1641	0.973223					96.1787	0.973223
3.16228	-4.6787		15.2085	0.955951					43.814	0.955951
6.32845	-0.162342		19.8617	0.98702					45.6039	0.98702
2.47988	-0.424918		23.0309	0.99572					80.3049	0.99572
4.24863	0.632238		14.7851	0.996396					104.118	0.996396
11.4287	0.632908		20.433	0.977802					87.9123	0.977802
8.97113	0.464048		6.34072	0.966122					135.751	0.966122
10.8325	0.512652		7.53732	0.988977					55.1528	0.988977
13.7377	0.955143		20.8598	0.993206					110.069	0.993206
3.12932	-0.934413		20.6278	0.992696					89.5533	0.992696
12.5695	0.931208		12.9611	0.945926					82.4595	0.945926
12.3377	0.614127		2.54757	-2.77719					13.0414	-2.77719
2.89238	0.00588266		3.9343	0.358594					101.844	0.358594
9.06607	0.378724		29.1588	0.999352					104.501	0.999352
12.0009	0.719955		3.16228	-6.52858					31.8828	-6.52858
9.60634	0.293229		4.11179	0.948825					98.5242	0.948825
1.67602	-0.186575		10.2578	0.973501					66.4022	0.973501
7.21464	0.303798		4.05349	0.730885					55.0555	0.730885
3.34684	-0.51966		26.3444	0.965832					87.9593	0.965832
8.09927	0.411534		11.8727	0.776295					125.834	0.776295
19.713	0.957839		3.47247	0.732506					75.7551	0.732506
0.0142544	-0.0212044		3.00647	0.396347					179.315	0.396347
5.27719	0.000943613		21.5691	0.974313					79.3724	0.974313
13.5095	0.804657		17.1814	0.985035					56.095	0.985035
14.8606	0.940168		28.1144	0.992664					93.4568	0.992664
1.34424	-0.00256858		11.2847	0.835367					84.6029	0.835367
8.23403	0.639271		2.73676	0.498139					162.742	0.498139
16.6249	0.543823		3.16228	-1.15983					100.91	-1.15983
7.30896	0.38152		17.84	0.996742					97.6228	0.996742
9.08439	0.163749		23.0922	0.971199					68.4319	0.971199
9.01788	0.364492		33.5011	0.997178					96.4003	0.997178
7.45126	0.311928		2.59204	0.0589453					154.555	0.0589453
0.0104572	-0.00716186		9.66518	0.937521					98.7065	0.937521
7.837	0.47074		18.8273	0.846877					34.2302	0.846877
7.03163	0.540539		8.79691	0.99287					91.3664	0.99287
0.356242	-0.388036		14.8232	0.963517					142.363	0.963517
10.4439	0.937985		3.16228	0.204163					94.075	0.204163
8.48399	0.800844		16.1978	0.873635					36.4865	0.873635
5.76693	-0.126754		3.63016	0.598803					93.0819	0.598803
11.8794	0.573115		11.4779	0.988531					79.5936	0.988531
0.113948	-0.620592		2.83714	0.756971					76.0488	0.756971
3.04525	-0.0124381		15.1572	0.97735					104.32	0.97735
13.4581	0.313238		4.94183	0.365449					74.4496	0.365449
0.158114	-0.529598		21.2503	0.995238					69.9462	0.995238
20.6957	0.977195		9.24006	0.977997					123.614	0.977997
9.31197	0.144719		18.2069	0.995751					101.392	0.995751
1.91976	-0.126412		13.6645	0.904351					97.9426	0.904351
18.0401	0.289118		29.7401	0.987753					99.5097	0.987753
0.000150504	-0.00950567		3.15257	0.244109					105.323	0.244109
7.1333	0.315534		18.2448	0.991134					115.58	0.991134
0.00571666	-0.0795233		18.7367	0.984415					100.343	0.984415
2.05279	-0.124268		20.7168	0.983113					92.658	0.983113
1.00655	-0.0497706		4.40121	0.430833					72.5976	0.430833
4.70559	-0.792817		17.1585	0.980466					99.7095	0.980466
0.00484139	-0.00170933		6.61868	0.748612					114.551	0.748612
10.3319	0.634518		6.12166	0.968684					110.468	0.968684
6.49901	0.65058		7.64429	0.76664					158.124	0.76664
11.0174	0.308203		13.2003	0.952544					147.553	0.952544
6.89775	0.136894		25.5471	0.997205					91.4382	0.997205
11.2892	0.787028		25.0879	0.995024					105.406	0.995024
0.593458	-0.00300465		7.16698	0.947232					166.814	0.947232
4.72025	0.0568688		6.31589	0.608697					91.5138	0.608697
7.14839	0.162387		12.0528	0.997606					84.7211	0.997606
2.40602	-0.898021		18.838	0.948734					87.9878	0.948734
1.45155	-0.102555		9.90257	0.996669					8.91489	0.996669
3.96209	-0.951454		5.60539	0.838546					174.944	0.838546
1.9963	-0.235271		14.4219	0.963526					77.5321	0.963526
4.24737	0.127002		18.863	0.994292					95.7027	0.994292
0.00884028	-0.0582198		0.966863	-0.00983968					50.7351	-0.00983968
4.10151	0.042443		22.5873	0.980711					77.7669	0.980711
0.00211055	-0.00792219		22.9283	0.916213					139.708	0.916213
2.62991	0.0140349		6.60859	0.976959					41.4599	0.976959
8.04712	0.57		37.4502	0.995717					72.259	0.995717
6.96825	0.265372		17.1506	0.980233					92.7233	0.980233
0.00793636	-0.000370989		26.8912	0.985047					117.501	0.985047
13.5401	0.654184		2.55826	-0.222972					110.487	-0.222972
2.13873	-0.017895		11.831	0.846003					76.7736	0.846003
6.02191	0.503867		21.9834	0.99987					64.7625	0.99987
5.87995	-0.548385		26.6922	0.955677					124.871	0.955677
0.000151225	-0.00025628		12.1251	0.989401					76.2071	0.989401
0.0119037	-0.0339089		4.69683	0.736626					116.724	0.736626
9.70905	0.623592		16.9067	0.995832					121.446	0.995832
0.810449	-0.00386044		5.47191	0.929399					63.4959	0.929399
8.28401	0.832732		4.17996	0.876335					137.798	0.876335
3.85738	-1.03564		8.52217	0.627243					143.349	0.627243
0.0103614	-0.000397675		1.70986	-0.117763					NaN	-0.117763
4.57685	-1.42685		4.4106	0.430088					47.052	0.430088
11.2918	0.693043		4.09415	0.924934					148.306	0.924934
2.29538	-1.15399		16.7622	0.994317					103.361	0.994317
2.34073	-1.47664		8.69344	0.995122					73.0858	0.995122
4.38354	-0.0471948		0.00110809	-0.00027909					6.00781	-0.00027909
0.00393924	-0.000931899		19.972	0.992983					86.465	0.992983
3.0255	0.461196		17.9297	0.98914					124.015	0.98914
3.2383	-0.206741		7.29691	0.872967					122.115	0.872967
4.66141	-0.173012		5.93306	0.968221					150.08	0.968221
0.000150083	-0.00152474		26.6439	0.978333					113.745	0.978333
11.1702	0.897665		20.0882	0.981831					94.4753	0.981831
13.0229	0.682239		6.13134	0.957133					79.0151	0.957133
10.587	0.920962		6.37752	0.587759					140.865	0.587759
3.16228	-0.588551		13.1812	0.808128					78.7737	0.808128
2.34175	-12.1962		20.843	0.931631					83.2928	0.931631
0.0119853	-0.0150661		7.21544	0.94291					164.928	0.94291
12.979	0.645021		31.7594	0.981154					154.046	0.981154
7.71962	0.209084		11.5363	0.986099					98.029	0.986099
12.3887	0.313957		14.0583	0.900199					85.8722	0.900199
20.1614	0.852112		3.16228	0.0520804					174.241	0.0520804
18.6645	0.98291		15.1953	0.935851					81.0367	0.935851
0.0518381	-0.461083		1.60533	-1.28671					NaN	-1.28671
0.241663	-0.379892		5.09339	0.7363					22.2218	0.7363
4.14125	-0.201528		7.19449	0.969351					119.718	0.969351
2.37252	-8.64467		12.9043	0.998174					101.158	0.998174
2.12906	-0.0119165		9.71727	0.95905					120.32	0.95905
1.83773	-0.0946034		12.9839	0.948974					14.6944	0.948974
6.94147	-0.572457		3.16228	-16.4605					130.941	-16.4605
2.65497	-0.0694168		19.1314	0.998082					89.3222	0.998082
3.18126	-0.195995		5.18048	0.983401					101.23	0.983401
10.9049	0.692446		4.50111	0.392503					52.3867	0.392503
3.16228	-0.354727		5.83531	0.918196					65.0457	0.918196
0.00622144	-0.0491271		7.45219	0.974534					77.9105	0.974534
4.75066	-0.137558		2.3212	-96.3157					178.993	-96.3157
15.1633	0.298436		16.9346	0.967169					75.2189	0.967169
0.338308	-0.706152		14.5096	0.996005					105.151	0.996005
0.00563489	-0.0128332		23.9513	0.996353					111.582	0.996353
22.5403	0.494439		3.43742	0.891909					111.084	0.891909
2.103	-0.0450141		19.5937	0.991281					103.064	0.991281
2.53495	-0.275247		2.02369	-0.358981					179.253	-0.358981
8.53558	0.670911		20.6779	0.998879					83.585	0.998879
2.89722	-0.241679		3.72639	0.752804					64.1897	0.752804
5.59247	-0.856518		5.06732	0.300316					120.302	0.300316
4.12599	-0.835592		2.23396	-167.313					NaN	-167.313
5.84561	-0.913238		20.3142	0.991729					97.0211	0.991729
23.4399	0.798812		4.48318	0.934557					31.696	0.934557
0.294887	-0.508331		14.74	0.762821					128.209	0.762821
4.3563	-0.475388		6.47044	0.700391					66.7668	0.700391
18.3973	0.785878		2.41152	-16.1712					97.8798	-16.1712
3.16228	-0.644898		16.8345	0.92816					87.849	0.92816
2.50381	-0.883009		2.27178	-47.7927					NaN	-47.7927
4.10802	-0.852134		0.00014953	-6.39713e-05					93.3318	-6.39713e-05
0.00380864	-2.72859e-05		9.388	0.973336					117.692	0.973336
7.38909	0.391807		6.82966	0.968687					133.006	0.968687
4.11038	0.574412		5.94266	-0.451884					17.5664	-0.451884
18.1892	0.776977		16.4338	0.951134					117.776	0.951134
6.78921	0.669917		2.55511	-0.212374					26.1025	-0.212374
25.9313	0.967017		7.28964	0.95103					101.71	0.95103
22.174	0.828754		0.0703696	-0.0978255					91.3727	-0.0978255
3.61368	0.227539		0.134356	-0.148813					112.204	-0.148813
0.14204	-0.614891		9.90095	0.962984					83.8435	0.962984
32.5405	0.818037		17.5461	0.979791					84.5727	0.979791
20.1539	0.936176		12.035	0.962142					90.5924	0.962142
6.2401	0.485724		15.6468	0.944448					100.796	0.944448
13.0359	0.973846		7.24804	0.973357					84.6077	0.973357
4.53501	0.419114		19.8664	0.999119					112.311	0.999119
6.59121	0.36477		20.9237	0.978846					91.5064	0.978846
9.08624	0.524553		2.35677	-33.2482					179.84	-33.2482
29.9583	0.996034		9.11184	0.994033					60.3772	0.994033
11.5008	0.488417		25.7634	0.966409					110.629	0.966409
12.6689	0.625444		13.571	0.986165					116.53	0.986165
1.48971	-0.0260926		11.7741	0.973713					135.037	0.973713
2.20908	-1.10965		15.8585	0.980126					88.5044	0.980126
10.8026	0.144867		10.3309	0.987153					164.897	0.987153
8.01737	0.018208		3.85775	0.717853					109.774	0.717853
15.735	0.504259		6.84666	0.926895					103.574	0.926895
14.2906	0.943063		10.736	0.986323					90.9556	0.986323
5.12112	0.627368		9.23945	0.943234					18.7542	0.943234
54.6348	0.938368		15.7265	0.997211					87.098	0.997211
0.149769	-0.958297		15.7477	0.992882					69.5075	0.992882
1.51481	-0.00123275		12.3166	0.933178					93.2687	0.933178
12.2903	0.933112		2.53094	-0.256655					60.4091	-0.256655
22.787	0.638492		5.455	0.980399					91.3901	0.980399
4.64539	-0.339508		14.2608	0.718841					106.783	0.718841
4.35079	0.000384689		6.42763	0.884652					98.1179	0.884652
9.73409	0.766198		7.64484	0.96633					118.619	0.96633
21.5441	0.981454		11.5415	0.924557					87.3231	0.924557
16.4029	0.782831		3.19791	0.805358					100.784	0.805358
0.332167	-1.06618		17.5143	0.98457					106.167	0.98457
0.000184599	-0.0140115		17.5335	0.982597					109.805	0.982597
11.7342	-0.284066		3.73754	0.0923656					79.7728	0.0923656
5.71899	0.0830822		17.0796	0.970449					106.397	0.970449
1.74543	-0.458981		11.1929	0.967504					87.4948	0.967504
3.33667	-0.14152		20.8247	0.975644					70.9696	0.975644
11.7264	0.880493		9.11081	0.903696					59.435	0.903696
7.28493	-0.331459		2.97843	0.827796					143.733	0.827796
2.11905	-0.0316294		6.21128	0.0616629					1.60933	0.0616629
12.6962	0.963495		12.1659	0.957371					98.3697	0.957371
32.2814	0.975451		4.65272	0.215212					165.374	0.215212
31.6327	0.970661		9.28341	0.978331					32.0437	0.978331
7.26162	-0.255067		7.22255	0.825135					98.7334	0.825135
2.80061	-0.0417881		11.9591	0.979644					81.4639	0.979644
3.16228	-0.326371		9.59906	0.572255					123.506	0.572255
6.87678	0.442886		9.05403	0.96679					77.2095	0.96679
11.6881	0.76054		11.6905	0.892375					107.842	0.892375
3.39372	0.132091		13.0936	0.890027					96.1325	0.890027
15.1999	0.969274		28.3149	0.978547					89.2393	0.978547
0.20443	-0.0210957		2.43135	-1.28742					53.525	-1.28742
5.33	0.913918		11.238	0.943221					106.734	0.943221
3.16228	-0.400795		22.1597	0.923371					73.0252	0.923371
2.95408	0.0172363		11.6705	0.947817					79.6016	0.947817
17.9169	0.873175		25.4479	0.99391					92.8144	0.99391
22.5561	0.884707		30.1819	0.989564					99.4179	0.989564
9.11304	0.266345		10.3314	0.940265					56.6192	0.940265
3.16228	-0.882111		2.46901	-1.90077					75.3939	-1.90077
0.000153266	-0.000559271		12.8915	0.995274					82.3014	0.995274
3.1929	0.0710479		18.349	0.979514					90.6549	0.979514
0.00762528	-0.039701		15.3964	0.956689					131.759	0.956689
26.9913	0.9749		8.41404	0.947475					56.959	0.947475
0.00420299	-0.0071742		5.67845	0.480167					46.7863	0.480167
32.0257	0.817685		3.95091	0.192955					143.895	0.192955
3.49164	-0.129512		3.16228	-15.4359					128.625	-15.4359
27.6909	0.92382		3.16228	-0.100793					74.1713	-0.100793
0.00128454	-1.49871e-05		12.4489	0.496672					171.075	0.496672
7.67987	0.583432		5.79564	0.89621					2.20535	0.89621
10.3542	0.724052		32.3502	0.995846					176.976	0.995846
3.99877	0.552316		11.6106	0.98595					66.4118	0.98595
17.8849	0.976428		0.158114	-0.32529					NaN	-0.32529
17.0534	0.92001		11.2249	0.573855					120.666	0.573855
21.0742	0.958937		12.3053	0.923552					52.4329	0.923552
5.3069	-0.957557		27.4814	0.994465					91.7753	0.994465
3.72531	0.0921563		8.05147	0.915033					81.752	0.915033
20.9805	0.449244		12.0295	0.977302					61.5604	0.977302
5.24901	0.0782365		13.282	0.99567					154.721	0.99567
3.16228	-0.879515		7.14923	0.944781					84.8563	0.944781
15.2758	0.885159		39.0563	0.984713					110.504	0.984713
2.73507	-0.199013		10.1339	0.980775					65.8183	0.980775
9.71204	0.423546		18.8602	0.956012					102.527	0.956012
4.87795	0.503202		9.98538	0.810538					137.433	0.810538
0.00634272	-0.00900598		7.05057	0.721476					88.0741	0.721476
0.381537	-0.1051		22.3833	0.931263					75.7079	0.931263
0.979579	-0.0401592		11.59	0.978499					23.9844	0.978499
0.30281	-0.541644		18.1449	0.997455					123.667	0.997455
3.88231	-0.495115		14.4103	0.990394					85.5229	0.990394
0.00349343	-0.00186881		10.8491	0.944849					70.9464	0.944849
8.93939	-0.170674		17.0427	0.963204					77.1145	0.963204
4.74338	0.386056		10.3381	0.911202					65.8183	0.911202
3.36018	0.1781		22.6553	0.99541					78.5913	0.99541
2.87557	-0.0661238		14.4382	0.998658					85.6988	0.998658
13.2003	0.750189		14.6363	0.990207					61.2416	0.990207
3.80588	-0.0121644		7.62081	0.909863					145.327	0.909863
40.4632	0.9723		3.84551	0.275573					101.959	0.275573
5.72131	0.62567		14.9182	0.995717					51.2836	0.995717
14.3811	0.954176		6.12122	0.829683					132.651	0.829683
8.28082	-0.0386258		10.4817	0.957442					64.275	0.957442
0.000151004	-0.0172507		2.68838	0.541041					82.3229	0.541041
4.33963	-0.257677		5.85606	0.902499					109.638	0.902499
4.50438	-0.0760656		6.23386	0.79776					110.709	0.79776
16.3422	0.958489		17.2424	0.978712					75.4032	0.978712
6.17263	0.713242		0.00990931	-0.000259585					5.95914	-0.000259585
3.5393	-0.0105545		0.000149098	-7.37437e-05					54.6359	-7.37437e-05
0.878251	-0.00405969		18.1749	0.997562					93.3701	0.997562
18.683	0.733055		8.06548	0.304161					127.076	0.304161
14.5167	0.866258		2.8978	0.720142					123.115	0.720142
8.61855	0.51635		6.6859	0.850992					135.203	0.850992
0.0119853	-0.0166489		2.36951	-3.74012					59.6801	-3.74012
11.6746	0.454034		11.3485	0.90464					110.702	0.90464
2.14006	-0.0269987		21.6934	0.9972					80.6111	0.9972
0.000149525	-0.00202396		15.9451	0.975147					92.1513	0.975147
3.38624	0.0847081		0.478168	-0.00373015					140.959	-0.00373015
3.9422	-1.16532		2.07785	-0.312319					11.4706	-0.312319
0.00984744	-0.133364		2.23632	-32.6816					NaN	-32.6816
1.74834	-0.00862486		3.16228	-16.1749					NaN	-16.1749
4.17665	-0.135852		11.3209	0.959321					175.698	0.959321
8.26839	0.837143		5.81564	0.656469					126.872	0.656469
3.17198	-1.03825		2.48251	-0.907695					118.946	-0.907695
1.63289	-0.478205		26.1703	0.999456					113.24	0.999456
17.5108	0.961409		12.5231	0.973784					117.019	0.973784
5.06415	-0.274583		10.948	0.937821					22.5013	0.937821
21.2624	0.987002		6.00135	0.955819					94.0024	0.955819
6.09254	0.751686		29.1674	0.993735					65.354	0.993735
6.15532	0.109711		3.17156	0.87839					55.6303	0.87839
0.497733	-0.00115175		14.9241	0.975218					179.712	0.975218
1.15195	-0.0218804		4.87777	0.833943					79.2185	0.833943
19.1381	0.965924		3.16228	0.719515					131.245	0.719515
15.1175	0.95359		20.8647	0.978108					125.662	0.978108
14.9592	0.659451		0.014132	-0.086762					55.8029	-0.086762
2.54182	-0.118921		17.4623	0.892737					73.928	0.892737
7.26972	0.108825		4.97703	0.971715					74.334	0.971715
28.4453	0.980678		7.82242	0.929469					139.576	0.929469
1.65155	-0.0394727		39.7613	0.999396					95.8343	0.999396
4.27271	0.143715		8.51361	0.901018					132.876	0.901018
19.9051	0.549831		18.0688	0.994012					120.122	0.994012
0.00015507	-0.0169817		3.16228	-11.1289					101.431	-11.1289
3.27925	-0.0670434		5.84226	0.945224					77.4413	0.945224
12.8379	0.914016		9.78856	0.967003					160.224	0.967003
11.6813	0.979868		9.02015	0.976763					152.908	0.976763
13.4373	0.774598		29.1815	0.983925					109.936	0.983925
17.1046	0.719521		2.70725	0.277698					55.6435	0.277698
10.7273	0.942309		19.1691	0.984736					101.343	0.984736
16.8688	0.954004		3.34131	0.901707					94.357	0.901707
17.9622	-0.17084		5.66681	0.974134					169.232	0.974134
0.00695623	-0.236754		2.376	-13.6844					77.0045	-13.6844
0.187521	-0.380905		20.4109	0.988756					79.2239	0.988756
18.3254	0.49866		0.00734058	-0.000414579					119.001	-0.000414579
1.64166	-0.00164661		8.08292	-0.264784					19.6913	-0.264784
0.00014919	-0.0070607		10.7545	0.902623					84.3531	0.902623
3.93738	-0.0478656		1.23619	0.00869803					4.38933	0.00869803
8.63776	0.631994		23.1909	0.988138					119.001	0.988138
3.16228	-0.141353		27.519	0.993541					105.483	0.993541
2.24552	-1.9888		6.92436	0.895649					101.654	0.895649
3.35129	-0.081041		7.97197	0.825216					9.23681	0.825216
1.42022	-0.197025		21.2568	0.992078					97.4657	0.992078
18.9293	0.973904		4.76829	0.530321					125.747	0.530321
0.00273381	-0.00148938		34.9767	0.989547					76.0084	0.989547
2.33435	0.0529266		12.0888	0.824791					67.6017	0.824791
0.0018392	-0.0170591		24.6866	0.968471					104.777	0.968471
2.07694	0.0902077		5.08122	0.812869					100.687	0.812869
6.72056	0.289714		13.97	0.934786					39.7412	0.934786
0.00839591	-0.000425708		12.1891	0.97341					76.063	0.97341
5.49798	0.348777		3.16228	-85.5593					112.926	-85.5593
10.1876	-0.495055		5.77674	0.863876					81.973	0.863876
4.6477	0.235123		3.82532	0.302273					44.3636	0.302273
20.808	0.889334		17.8473	0.995185					72.6707	0.995185
6.66411	0.524509		2.39001	0.129485					135.657	0.129485
0.0113864	-0.0141755		3.57171	0.452723					155.571	0.452723
1.39187	0.0022722		8.57538	0.951783					98.9685	0.951783
3.16228	-0.174273		5.06326	0.170251					9.19198	0.170251
3.01349	-0.175919		11.7731	0.892472					4.52774	0.892472
4.27862	0.400818		7.83525	0.843632					168.639	0.843632
8.53654	0.874559		14.2195	0.997276					90.1446	0.997276
3.79016	0.064159		34.2515	0.991993					104.487	0.991993
2.14913	-0.169971		23.5232	0.996479					90.2367	0.996479
3.16228	-1.06246		10.643	0.903593					2.83577	0.903593
0.0100414	-0.00338715		28.1362	0.990207					142.541	0.990207
8.08322	0.510679		2.19626	0.0932963					54.7376	0.0932963
3.79923	0.0228316		18.2585	0.973333					82.6974	0.973333
11.5136	0.17985		9.76325	0.910512					53.9264	0.910512
7.79403	0.424676		5.93729	0.933801					78.1182	0.933801
19.4529	0.035632		7.34953	0.730908					39.0296	0.730908
4.4858	0.326171		11.8623	0.964879					0.986508	0.964879
8.11218	0.789419		10.9643	0.822827					111.352	0.822827
2.63692	-0.0962085		0.00448972	-0.0269627					49.9934	-0.0269627
6.5298	0.304423		11.3953	0.989096					101.965	0.989096
6.90596	-0.920822		13.9688	0.969287					85.7562	0.969287
0.198594	-0.000293933		6.30584	0.392977					97.3753	0.392977
6.87157	0.247197		1.64689	-2.00643					NaN	-2.00643
3.66629	0.17573		9.29067	0.98969					79.0588	0.98969
3.16228	-0.557251		3.16228	-0.0346542					179.453	-0.0346542
0.000151315	-0.003302		10.7866	0.968009					116.784	0.968009
7.35367	0.752087		7.67447	0.995513					74.8958	0.995513
4.37435	-0.542635		5.07662	0.872053					10.1005	0.872053
0.00506818	-0.00927666		5.54253	0.958275					116.084	0.958275
1.68313	-0.600308		31.3134	0.933425					112.04	0.933425
5.43086	0.0455468		2.33479	-0.982882					66.6222	-0.982882
21.4658	0.94156		5.33572	0.737773					120.495	0.737773
0.00637454	-0.187083		33.5658	0.970916					97.4005	0.970916
2.96814	0.0122058		14.5412	0.973427					94.7601	0.973427
0.548879	-0.026416		8.46193	0.950186					104.7	0.950186
3.16228	-19.0718		17.8603	0.964852					77.2272	0.964852
6.99085	0.883221		10.8407	0.244024					134.856	0.244024
7.08448	0.342074		3.33724	0.614483					113.032	0.614483
3.39081	0.21198		7.61401	0.865013					81.6259	0.865013
6.75425	-1.04395		17.7205	0.92922					167.462	0.92922
5.58025	0.8379		14.5004	0.916613					173.008	0.916613
4.66663	0.0660165		0.000149098	-1.28678e-05					49.7601	-1.28678e-05
3.17654	0.021963		4.41438	0.829229					174.984	0.829229
5.00776	0.231642		5.85013	0.745304					164.799	0.745304
3.16228	-1.32238		2.51017	-0.552659					20.0804	-0.552659
3.92794	-0.0633106		3.16228	-0.18742					51.01	-0.18742
3.37552	-0.229766		17.5467	0.955411					4.80505	0.955411
0.00491147	-0.000819348		8.23815	0.977478					1.09924	0.977478
0.130413	-0.852365		31.0909	0.978955					95.8153	0.978955
3.16228	-0.674208		2.3925	-6.19258					13.5121	-6.19258
6.43044	0.621329		12.2343	0.990672					111.044	0.990672
6.92807	0.892224		6.36874	0.910538					34.6027	0.910538
9.35754	0.419684		2.94114	0.294043					168.681	0.294043
3.16228	-0.590444		10.3166	0.825718					104.974	0.825718
4.50959	-0.517022		18.448	0.958254					15.4679	0.958254
4.37803	0.0757943		13.6311	0.960689					59.4814	0.960689
3.16228	-7.30606		1.82636	-2.03821					59.1112	-2.03821
8.58633	0.00187655		13.2813	0.976147					83.1921	0.976147
3.16228	-0.176978		5.78106	0.0890585					107.375	0.0890585
1.53549	-0.0224508		0.0940252	-0.239512					104.991	-0.239512
8.75848	0.45773		0.598157	-0.000537779					155.93	-0.000537779
10.5787	0.439251		5.72129	0.856174					104.481	0.856174
2.22852	-0.925764		13.4836	0.98518					93.9356	0.98518
0.00479513	-0.00685498		3.16228	-11.1289					48.5701	-11.1289
10.9481	0.943019		1.74945	-8.70538					110.93	-8.70538
11.3696	0.897041		5.67357	0.908602					71.5203	0.908602
7.57031	0.667004		17.0212	0.970589					69.938	0.970589
3.03557	0.61208		13.657	0.983717					108.706	0.983717
13.5173	0.48472		0.00148868	-0.00416054					39.0579	-0.00416054
1.27769	-0.205811		3.16228	-0.0346542					147.879	-0.0346542
2.39371	-0.588594		10.1647	0.972837					100.681	0.972837
0.00730951	-0.00449111		18.3999	0.995805					174.229	0.995805
7.36381	0.0359945		6.85817	0.67649					90.569	0.67649
14.0425	0.577048		4.55386	0.334179					11.8692	0.334179
10.5892	-0.36619		7.93007	0.985058					85.1778	0.985058
17.0876	0.912222		2.28866	-1.02513					16.0034	-1.02513
0.000150936	-0.0131503		27.0084	0.909659					78.1047	0.909659
3.36282	0.0978045		21.4741	0.963121					98.3545	0.963121
3.66925	-0.0655937		17.5453	0.970692					71.437	0.970692
2.82241	-0.0381484		6.62433	0.973423					118.348	0.973423
3.16228	0.642228		25.7576	0.93778					172.747	0.93778
0.000155451	-0.000987892		6.0371	0.931076					49.9759	0.931076
0.0743122	-0.222481		14.2341	0.98985					82.5735	0.98985
2.16851	-0.292204		6.52881	0.99441					173.489	0.99441
14.8522	0.795132		0.93371	0.00108663					118.586	0.00108663
1.33472	-0.291139		15.1563	0.963752					124.791	0.963752
26.1802	0.200714		19.4207	0.998159					65.7032	0.998159
24.9533	0.773626		4.72864	0.896068					24.7193	0.896068
7.04336	-1.28473		10.0127	0.976603					128.362	0.976603
4.82744	0.22122		3.16228	-7.51222					57.8592	-7.51222
12.8709	0.40626		22.4268	0.995253					83.0391	0.995253
6.79114	-1.64905		13.8635	0.946568					86.0796	0.946568
6.21428	-0.0373507		11.3836	0.874058					84.7395	0.874058
0.00225642	-0.140858		12.8787	0.984448					112.207	0.984448
0.875777	-0.00948073		23.5538	0.989048					97.7341	0.989048
1.04121	-0.0740683		4.14423	0.901856					49.6934	0.901856
3.16228	-4.24471		2.63313	0.131017					102.341	0.131017
19.0835	0.766874		12.5563	0.977162					92.8696	0.977162
14.5359	0.577838		8.46202	0.991164					102.493	0.991164
1.15542	-0.0136843		14.22	0.992063					137.191	0.992063
7.43168	0.460047		20.7214	0.97494					105.414	0.97494
3.16228	-0.650085		33.184	0.990376					84.4183	0.990376
4.28315	-1.1035		5.83956	0.969776					132.568	0.969776
2.23373	0.000974507		6.43518	0.966284					78.3714	0.966284
4.00551	0.00431331		12.4834	0.927009					130.858	0.927009
4.17782	-0.0254635		18.4416	0.964145					106.11	0.964145
12.3681	0.990612		5.02294	0.536753					51.3295	0.536753
0.00708273	-0.00181452		25.3077	0.973095					89.3811	0.973095
0.197356	-0.213979		12.1165	0.994008					74.1632	0.994008
0.00962768	-8.72888e-05		2.45979	-1.00126					26.7554	-1.00126
11.5253	0.852821		18.5044	0.992267					98.33	0.992267
0.00600028	-0.00134419		0.000149012	-0.0072241					104.046	-0.0072241
8.10715	0.478022		4.58825	0.848606					68.1888	0.848606
0.024973	-0.326852		16.4941	0.997484					76.9491	0.997484
10.8772	0.629512		18.5705	0.971375					87.433	0.971375
11.6242	0.624585		5.34471	0.415761					53.9431	0.415761
10.1853	0.994793		26.7045	0.998361					97.4656	0.998361
2.55997	-0.117233		21.325	0.998977					96.6478	0.998977
6.64269	0.856206		2.92172	0.0618164					14.7779	0.0618164
11.2749	0.669807		17.8637	0.991409					128.659	0.991409
5.21417	-0.412949		17.4661	0.988608					96.2905	0.988608
0.00256222	-0.00650248		16.9443	0.875698					73.1094	0.875698
5.91385	-0.145346		3.16228	-1.55507					25.2847	-1.55507
0.00569366	-0.0727953		0.0104159	-1.68848e-05					117.728	-1.68848e-05
16.3036	0.529974		2.37358	-14.7376					70.0292	-14.7376
5.14428	0.330369		20.8684	0.994036					99.0343	0.994036
2.57614	-0.0163467		1.67541	-21.6188					114.764	-21.6188
0.000174661	-0.00837595		15.8249	0.967013					21.5057	0.967013
2.1251	-0.056696		37.9158	0.998195					97.3911	0.998195
3.47556	0.108469		3.60234	0.13634					113.201	0.13634
1.71603	-0.0195584		15.1193	0.97911					105.828	0.97911
9.15584	-0.0100519		18.6749	0.953115					88.9446	0.953115
3.73522	0.00532229		15.6349	0.94155					105.008	0.94155
1.11514	-0.00619792		2.23607	#NAME?					NaN	#NAME?
14.2364	0.778721		8.65835	0.932376					85.2061	0.932376
0.259756	-0.609322		5.16832	0.218559					128.945	0.218559
0.0761445	-0.256228		6.35967	0.986895					83.4365	0.986895
3.68411	0.094022		15.2033	0.897428					173.843	0.897428
4.67477	0.397068		25.6349	0.873878					91.8606	0.873878
0.00543695	-0.0139715		3.6241	0.43141					66.3844	0.43141
22.4526	0.871321		2.37959	-22.7228					83.2527	-22.7228
10.0207	0.688651		7.77596	0.98182					122.838	0.98182
0.00911313	-0.0102308		3.10354	0.900212					45.1265	0.900212
1.97341	-0.0191082		7.36959	0.271597					84.2599	0.271597
0.000176279	-0.00851124		8.60293	0.901129					69.3262	0.901129
0.000149639	-2.95823e-05		11.0025	0.965367					75.5518	0.965367
0.000153358	-0.000725557		10.8956	0.996784					99.3265	0.996784
2.48099	-2.08931		24.4731	0.986013					90.045	0.986013
37.9428	0.748613		1.7649	-0.0483626					63.764	-0.0483626
7.01927	0.450593		18.1814	0.998713					93.8114	0.998713
1.39068	-0.00186767		5.17757	0.997372					11.0762	0.997372
4.98618	-0.707616		2.45866	-1.95032					84.5459	-1.95032
6.81865	-1.29451		3.16228	-1.99304					39.4763	-1.99304
9.72082	0.832521		2.53756	-0.561795					78.3371	-0.561795
6.45669	0.916493		17.596	0.99476					107.344	0.99476
14.3828	0.839147		4.22171	0.042138					20.2235	0.042138
2.85669	0.0061668		2.11138	-0.610244					NaN	-0.610244
3.80964	-0.5187		3.71749	0.86659					101.335	0.86659
3.29202	0.0057053		18.6538	0.986816					88.0599	0.986816
2.17755	-0.103846		2.77	0.379529					37.0461	0.379529
15.4554	0.716795		18.0477	0.603914					157.541	0.603914
0.185416	-0.0705076		43.1733	0.960288					105.583	0.960288
9.48411	0.283226		9.48874	0.940936					130.709	0.940936
6.97176	0.756088		8.21976	0.906388					86.9005	0.906388
0.00631505	-0.124635		2.27319	-15.4757					NaN	-15.4757
23.4695	0.98297		5.48816	0.981332					21.0413	0.981332
2.72151	0.0115158		29.6675	0.949839					105.475	0.949839
9.67052	0.582135		12.8835	0.999456					84.2864	0.999456
1.75906	-0.0121876		14.0272	0.992726					105.054	0.992726
4.92071	-0.259087		9.90134	0.796774					159.462	0.796774
7.1723	0.597941		8.88546	0.812577					97.2054	0.812577
3.16228	-0.328878		6.1229	0.950126					97.2054	0.950126
1.951	-0.00954346		13.1523	0.991593					72.7202	0.991593
8.63483	0.431393		0.0360914	-0.0353858					38.9845	-0.0353858
0.000149908	-0.000317041		2.3674	-8.50608					53.5292	-8.50608
11.3676	0.861101		5.78303	0.855569					24.7037	0.855569
0.000154165	-0.000631194		6.56612	0.294723					86.1904	0.294723
14.2005	0.762716		3.60591	0.605319					4.48452	0.605319
12.8314	0.764647		24.6825	0.997803					83.3817	0.997803
5.57499	0.435782		9.30758	0.847221					60.395	0.847221
0.00758293	-2.3383e-06		0.00015286	-0.00191343					67.6913	-0.00191343
0.000150134	-0.00430879		2.43435	-1.75372					137.485	-1.75372
18.8683	0.988047		29.9547	0.971707					83.9845	0.971707
7.49936	0.511287		2.59059	-0.0567993					122.425	-0.0567993
23.2238	0.965623		14.4995	0.836217					69.8218	0.836217
3.76258	-0.20897		0.0036792	-0.000188139					158.232	-0.000188139
3.16228	-1.81138		2.64799	0.386248					98.8276	0.386248
6.28452	-1.04374		8.8912	0.701908					156.017	0.701908
0.00760531	-0.0933663		8.92145	0.785484					67.2175	0.785484
7.12852	0.819006		36.2582	0.988555					88.792	0.988555
6.21342	0.567026		11.0713	0.897304					112.917	0.897304
1.99555	-0.113354		14.3087	0.983052					94.8505	0.983052
1.87551	-0.323269		37.8589	0.99713					98.3912	0.99713
1.45692	-0.044613		9.78297	0.954657					107.582	0.954657
4.23591	-0.170389		6.7483	0.865487					84.2921	0.865487
1.01855	-0.0196418		18.2066	0.9029					8.72809	0.9029
25.2594	0.984964		15.7616	0.991613					24.6294	0.991613
4.12754	-1.03669		0.00123617	-1.70823e-06					56.0209	-1.70823e-06
5.51338	-0.490454		8.37622	0.977436					77.6443	0.977436
0.000155464	-0.00124501		7.26633	0.940245					161.885	0.940245
5.58167	0.503398		7.5919	0.813773					100.23	0.813773
0.0397246	-0.0382517		7.12194	0.781004					85.0441	0.781004
8.67614	0.532942		15.9176	0.99035					79.0308	0.99035
2.32581	-0.653602		19.9885	0.955734					104.651	0.955734
2.00033	-0.255461		1.09937	-0.0223719					85.5089	-0.0223719
6.69532	0.0439918		34.2199	0.998659					85.722	0.998659
3.16228	-2.16853		8.96593	0.970846					113.094	0.970846
1.45444	-0.420714		16.9504	0.936265					91.9359	0.936265
0.00639093	-0.0045289		7.81766	0.874578					127.756	0.874578
2.29732	-4.20697		25.9116	0.981481					94.4254	0.981481
16.0308	0.758349		7.20974	0.947981					90.1756	0.947981
2.00402	0.00664984		11.6	0.968747					114.34	0.968747
0.0107189	-0.00300328		28.3173	0.991635					85.5052	0.991635
4.73677	0.290347		2.52203	-0.567304					69.2312	-0.567304
3.85338	0.877073		29.0476	0.996593					103.284	0.996593
0.000153767	-0.000447363		15.6574	0.995347					81.76	0.995347
3.02996	-0.217456		24.0086	0.990691					141.49	0.990691
23.0919	-0.795552		30.9661	0.992314					101.488	0.992314
2.85617	-0.57682		8.88866	-0.141256					98.7166	-0.141256
0.00295717	-9.53122e-05		2.65861	0.102795					115.46	0.102795
0.0637132	-0.70787		3.26815	0.514154					78.7005	0.514154
0.000166444	-0.00190089		9.65863	0.720007					37.5638	0.720007
10.8944	0.891076		7.72276	0.793317					177.237	0.793317
0.851517	-0.0185915		5.1763	0.856553					145.63	0.856553
1.83646	-0.341917		22.859	0.923409					87.1091	0.923409
18.1914	0.660472		17.847	0.991884					70.4629	0.991884
4.14619	-1.00764		12.2958	0.745358					53.908	0.745358
7.42514	0.252237		8.5805	0.959054					65.9479	0.959054
0.000167108	-0.00444459		18.6018	0.994677					97.0307	0.994677
9.3778	0.531909		9.35062	0.986659					8.21262	0.986659
2.31506	-0.0574203		7.42928	0.940081					118.158	0.940081
0.271293	-0.293721		20.7691	0.964241					2.07978	0.964241
5.40214	0.0439234		17.7067	0.996699					52.1354	0.996699
5.73781	-0.558617		20.3887	0.995282					97.2609	0.995282
4.86037	-1.35055		5.83965	0.67128					159.433	0.67128
25.261	0.788094		11.3347	0.8737					171.058	0.8737
3.75957	-0.278641		22.4747	0.931022					112.753	0.931022
5.38776	-0.75878		11.9617	0.984189					69.7744	0.984189
0.272104	-0.0694597		5.19758	0.205985					176.535	0.205985
8.32302	0.473113		27.4611	0.996545					96.1271	0.996545
1.78081	-0.0800564		23.1048	0.995737					115.153	0.995737
3.16228	0.775906		33.7765	0.989172					12.695	0.989172
0.000157719	-0.00112684		25.396	0.960271					120.611	0.960271
3.01747	-0.141874		0.0111266	-3.08905e-05					74.5741	-3.08905e-05
2.012	-0.232599		14.8667	0.995492					131.921	0.995492
9.35353	0.2534		23.6625	0.882098					130.444	0.882098
3.16228	-1.28059		4.38306	0.810472					41.6913	0.810472
2.59126	-0.480584		4.79582	0.977058					130.91	0.977058
0.00956925	-0.000361468		16.2321	0.994176					95.2156	0.994176
0.104457	-0.778636		6.11944	0.915784					123.865	0.915784
5.86921	0.631387		0.953049	0.00117263					28.4271	0.00117263
5.6134	0.577637		22.4329	0.970772					54.7622	0.970772
3.3776	0.217428		17.8142	0.987319					79.3603	0.987319
6.76816	-0.034117		14.1416	0.964153					114.028	0.964153
0.0829863	-0.504351		11.9816	0.884851					108.863	0.884851
5.81292	0.611772		23.4895	0.996369					97.2976	0.996369
2.93719	-0.205925		9.51868	0.955709					84.6539	0.955709
0.170146	-0.589083		14.5923	0.933175					89.4473	0.933175
16.7532	0.637075		9.36577	0.0618681					97.1721	0.0618681
1.40782	0.0032703		30.7058	0.997246					103.029	0.997246
6.4822	0.371133		13.5073	0.947946					92.1693	0.947946
15.1502	0.490043		20.6723	0.992711					105.59	0.992711
7.72128	0.582162		2.86005	0.499902					115.44	0.499902
13.5869	0.618744		11.2411	0.98525					13.3669	0.98525
22.1545	0.756467		25.6534	0.999697					83.1219	0.999697
11.9362	0.253303		4.93351	0.146383					89.7368	0.146383
2.46187	-2.37109		9.68938	0.970831					122.729	0.970831
2.38265	-0.0571555		26.6762	0.962364					138.023	0.962364
1.37686	-0.472569		17.5954	0.982803					100.114	0.982803
1.963	-0.100906		9.48702	0.854881					103.984	0.854881
4.11895	0.73459		12.7961	0.937282					91.5597	0.937282
0.00649553	-0.0456415		19.9572	0.997763					82.2815	0.997763
6.47029	-0.867802		6.35847	0.824394					105.213	0.824394
11.0281	0.241777		13.0208	0.936193					130.91	0.936193
4.7875	0.0539952		2.69772	0.558804					67.9454	0.558804
11.8136	0.662308		6.51988	0.676179					42.5667	0.676179
0.00418027	-0.0473078		10.9986	0.997058					105.345	0.997058
0.00540633	-0.0317491		33.8694	0.990219					96.5666	0.990219
17.914	0.982056		17.1299	0.922526					151.466	0.922526
6.45096	0.537315		32.1123	0.985617					80.5878	0.985617
4.05963	0.497509		9.92107	0.944557					159.132	0.944557
4.11796	-0.443629		8.45885	0.954681					4.98518	0.954681
10.6087	0.519931		28.6775	0.988244					124.398	0.988244
2.55388	-0.00591459		30.1657	0.993005					80.8469	0.993005
5.29697	0.266013		2.44565	-2.62272					63.7091	-2.62272
22.387	0.0921984		2.93864	0.5598					93.9703	0.5598
1.55076	-0.0139062		27.3194	0.998863					96.9869	0.998863
3.19907	-0.267205		2.35916	-10.7275					177.94	-10.7275
2.56033	-0.0581787		19.9198	0.945099					112.231	0.945099
0.267375	-1.391		29.1098	0.979262					47.8233	0.979262
14.3854	-0.729385		9.58822	0.985703					2.22937	0.985703
9.9083	0.941221		0.0079648	-0.000142837					12.3542	-0.000142837
7.35521	0.390739		8.86937	0.163027					84.2229	0.163027
3.15952	-0.0954941		13.3531	0.9833					108.16	0.9833
11.9232	0.435822		8.14868	0.679071					102.369	0.679071
0.355664	-0.84784		28.1109	0.992195					116.761	0.992195
3.16228	-1.22486		8.07086	0.993601					84.5206	0.993601
16.2262	0.922094		19.3591	0.951139					147.549	0.951139
11.4129	0.486416		11.8155	0.999366					73.6011	0.999366
7.40513	0.850654		22.5882	0.993402					97.1373	0.993402
0.0274602	-0.487439		2.32865	-4.40014					NaN	-4.40014
3.98464	0.240552		4.25528	0.714898					102.278	0.714898
0.383089	-0.22045		23.0131	0.994737					113.263	0.994737
8.2357	0.717305		10.0265	0.932796					87.0225	0.932796
21.8398	0.642095		22.9205	0.983204					81.1784	0.983204
1.47722	0.0107477		9.1373	0.933217					138.065	0.933217
19.0256	0.650685		1.89757	-0.0890202					18.0443	-0.0890202
0.15348	-0.408771		34.692	0.750741					2.85564	0.750741
6.09678	0.666728		25.9982	0.999456					117.248	0.999456
26.7901	0.930315		2.58723	0.0828422					68.8818	0.0828422
20.3333	0.934069		2.77469	0.306144					84.4189	0.306144
3.16228	-0.332		4.61249	0.703453					102.207	0.703453
0.000149331	-0.000105651		8.45714	0.723824					104.353	0.723824
1.47297	-0.228211		3.06703	0.588414					167.838	0.588414
1.2033	-0.00151419		15.7789	0.985686					91.847	0.985686
13.6205	0.86096		13.4089	0.976412					82.7845	0.976412
2.87213	0.00648054		19.3881	0.998759					123.471	0.998759
0.230677	-0.120849		25.1263	0.978176					59.2329	0.978176
3.16228	-2.84434		5.9037	0.915309					83.6232	0.915309
3.16228	-55.7695		20.454	0.996084					92.1372	0.996084
1.56377	-0.00939451		11.3518	0.989264					96.9103	0.989264
14.7846	0.965067		28.1454	0.997395					46.7335	0.997395
6.5198	0.675908		35.2269	0.989977					82.7845	0.989977
18.2424	0.971978		20.5735	0.977367					96.28	0.977367
3.16228	-0.410711		4.18331	0.363962					78.1111	0.363962
6.47782	0.887675		3.53586	0.127764					77.0801	0.127764
13.4814	-0.623904		0.000151184	-5.99677e-05					104.403	-5.99677e-05
7.42359	0.871953		0.429119	-0.00166711					75.6424	-0.00166711
12.5082	0.635647		18.3247	0.998111					94.318	0.998111
42.8166	0.979244		0.0981974	-0.229848					81.1976	-0.229848
0.014692	-0.0799602		1.74411	-0.0062913					91.5444	-0.0062913
42.2595	0.762056		21.2406	0.99309					98.4448	0.99309
7.02138	0.87736		20.3695	0.956057					83.1713	0.956057
23.8184	0.95861		11.9488	0.990202					85.2533	0.990202
9.2913	0.8867		4.66926	0.381643					10.4147	0.381643
25.0902	0.888385		18.6636	0.985867					68.3942	0.985867
11.3999	0.857752		9.6183	0.988638					10.7127	0.988638
0.152818	-0.350091		27.3857	0.934125					173.029	0.934125
4.21178	-0.80917		20.4643	0.97049					63.4778	0.97049
9.7168	0.840942		12.2453	0.859765					93.2805	0.859765
0.000166779	-0.00716814		2.68542	0.0598147					39.0344	0.0598147
13.4954	0.987743		25.0165	0.830156					93.8445	0.830156
7.77792	0.165586		19.4496	0.952939					24.0191	0.952939
1.93056	0.00765888		26.3815	0.989874					4.94937	0.989874
6.14159	0.246763		16.0716	0.975486					91.1989	0.975486
17.5268	0.990795		2.83532	0.392912					8.87837	0.392912
3.1166	0.403734		5.20309	0.773991					76.0322	0.773991
12.7618	0.863856		2.36251	-0.976263					24.1044	-0.976263
23.2253	0.985652		3.16228	0.705944					123.536	0.705944
0.954208	-0.017759		3.29441	0.207183					114.688	0.207183
31.8056	0.864491		5.30287	0.777369					68.3699	0.777369
4.0955	0.35647		6.23427	0.991525					114.593	0.991525
58.962	0.916679		26.3788	0.968127					102.07	0.968127
18.3626	0.953171		16.4977	0.997871					68.5697	0.997871
0.0880369	-0.282629		5.74743	0.560014					169.284	0.560014
3.16228	-1.32886		22.7015	0.992742					75.5272	0.992742
16.7598	0.984431		22.5864	0.997766					97.5407	0.997766
5.72277	0.15663		20.8843	0.925826					98.1825	0.925826
5.46725	0.715602		3.16228	-0.0674446					137.1	-0.0674446
6.52136	0.0381904		13.989	0.992591					109.668	0.992591
3.16228	0.0367963		5.62647	0.875978					178.543	0.875978
46.4175	0.727192		18.3253	0.994124					100.244	0.994124
0.0105299	-0.00115248		10.4449	0.964942					25.9022	0.964942
5.1436	0.714648		3.16228	-0.766324					115.717	-0.766324
8.32239	-0.836062		22.3	0.956455					80.4786	0.956455
16.1271	0.819399		22.171	0.968272					106.622	0.968272
2.06888	-0.496967		10.9446	0.974268					173.347	0.974268
3.16228	-3.22429		10.4893	0.974696					18.4997	0.974696
8.40043	0.564199		3.51446	0.182717					84.1256	0.182717
3.84407	0.711001		14.3548	0.966842					121.348	0.966842
0.0868951	-0.333415		15.6501	0.995727					102.74	0.995727
8.27035	0.914987		5.7602	0.885835					13.511	0.885835
17.1244	0.984149		17.6464	0.919607					112.05	0.919607
0.158114	-0.665832		17.815	0.954416					95.8984	0.954416
12.2001	-0.0403944		12.4093	0.73929					87.5353	0.73929
34.6758	0.734159		0.00350109	-0.00579402					22.226	-0.00579402
16.6453	0.883146		8.89419	0.988593					81.5278	0.988593
3.16228	-1.56931		2.91342	0.00968212					115.552	0.00968212
0.00352113	-0.00586937		2.4189	-0.675579					22.4269	-0.675579
18.294	0.973169		6.67793	0.917438					37.5144	0.917438
15.4263	0.940096		21.7796	0.997842					92.1353	0.997842
1.96539	0.00727944		8.19806	0.663583					4.93497	0.663583
11.2269	0.922009		2.63262	0.0265675					8.38869	0.0265675
9.24599	0.22013		13.3335	0.993365					116.59	0.993365
40.9361	0.950059		3.16228	-0.726235					158.93	-0.726235
1.23774	-0.0176736		4.46769	0.91581					76.2159	0.91581
3.82473	0.118175		4.27608	0.958566					175.887	0.958566
7.12787	0.334746		33.9556	0.998503					85.3678	0.998503
5.75791	0.212265		9.58964	0.860241					79.7073	0.860241
13.3905	0.618142		17.9756	0.988444					125.327	0.988444
20.0866	0.914815		5.77413	0.905216					126.644	0.905216
5.75986	0.68397		29.3373	0.985489					100.097	0.985489
17.0462	0.692259		18.4964	0.971439					114.229	0.971439
22.6599	0.798288		4.07233	0.952435					132.215	0.952435
30.824	0.967931		4.94843	0.938852					157.349	0.938852
9.02541	0.850358		8.03379	0.954816					92.2557	0.954816
25.0185	0.951793		3.16228	-3.72013					68.9567	-3.72013
22.4463	0.100004		22.9045	0.995489					73.643	0.995489
3.42559	0.0537169		12.449	0.980192					53.0195	0.980192
3.26739	0.400158		14.2687	0.967581					76.9576	0.967581
12.2364	0.493725		12.8943	0.994575					147.603	0.994575
2.30243	-3.25621		5.03574	0.648195					140.966	0.648195
8.8217	0.619514		0.103106	-0.000342941					109.23	-0.000342941
0.0104357	-0.0240395		6.7531	0.631893					70.1535	0.631893
3.18715	0.563165		13.7066	0.98424					89.0979	0.98424
11.5636	0.963377		5.15406	0.36908					179.951	0.36908
2.69853	-0.490151		10.3328	0.972265					66.5357	0.972265
12.5362	0.14522		3.16228	-5.82372					3.8791	-5.82372
4.54384	-0.187501		1.12656	-0.0928971					46.0988	-0.0928971
2.84408	0.33278		6.70818	0.818062					140.966	0.818062
1.0146	-0.00600566		3.18381	0.843455					127.601	0.843455
3.16228	-1.19371		11.5609	0.972177					73.7569	0.972177
7.9397	0.889124		12.5013	0.987538					138.496	0.987538
2.32955	-59.4346		17.2789	0.996413					108.386	0.996413
3.16228	-3.42692		32.1663	0.974597					171.36	0.974597
3.22594	0.00360032		14.179	0.983163					64.2763	0.983163
3.16228	-3.50674		13.3489	0.993869					77.298	0.993869
3.16228	0.323745		10.4417	0.964099					58.5035	0.964099
0.0877193	-0.249386		7.22797	0.973071					109.551	0.973071
12.0266	0.403345		17.8516	0.999258					109.181	0.999258
6.77453	-1.22951		8.46731	0.92718					87.5389	0.92718
15.0074	0.806021		17.07	0.995921					111.366	0.995921
0.0273287	-0.166317		1.37043	-0.0572751					131.955	-0.0572751
5.4461	-1.11629		9.41147	0.975834					46.3781	0.975834
4.58249	0.286855		0.00943157	-0.000289809					110.16	-0.000289809
23.0918	0.901486		2.61815	0.00136102					56.528	0.00136102
0.012931	-0.0128262		10.4745	0.952845					65.8381	0.952845
16.6655	0.342222		16.2668	0.9967					114.167	0.9967
17.3634	0.821063		8.97233	0.980904					119	0.980904
0.000157206	-0.000786155		21.7976	0.975118					89.2198	0.975118
2.32834	-1.05892		8.57763	0.991737					114.639	0.991737
13.3674	0.939706		2.33597	-10.5734					56.1827	-10.5734
3.5372	0.112234		12.0477	0.974332					51.0953	0.974332
10.2839	0.903992		3.70421	0.716693					112.383	0.716693
1.09587	0.000826357		2.68541	-0.0220354					33.1991	-0.0220354
2.16987	0.000822115		13.292	0.984651					98.424	0.984651
0.000158227	-0.0019068		2.76545	0.439548					56.5651	0.439548
6.65168	0.298085		10.1917	0.923146					139.005	0.923146
3.356	0.14999		2.57436	-0.226761					20.9315	-0.226761
1.84641	0.0281068		14.0592	0.952685					90.9277	0.952685
0.000149012	-0.000533117		23.2001	0.99872					94.4724	0.99872
8.02951	0.980047		8.81554	0.982626					128.282	0.982626
6.53368	0.102044		14.1279	0.985136					53.4161	0.985136
36.1259	-0.109054		6.70494	0.865336					61.7431	0.865336
16.5704	0.599704		11.3088	0.950884					94.7689	0.950884
14.5418	0.95574		25.3249	0.990642					86.6827	0.990642
9.4336	0.424523		3.95691	0.859111					145.611	0.859111
1.63604	-0.000236568		2.1612	-0.299798					9.52738	-0.299798
5.84233	0.36779		4.2314	-0.0150145					56.0042	-0.0150145
4.63592	0.0996358		10.6494	0.988464					88.458	0.988464
5.63639	0.22156		14.5126	0.982653					90.496	0.982653
4.95902	0.00985561		17.8595	0.997589					56.9836	0.997589
3.16228	0.0606399		31.6737	0.998917					98.8877	0.998917
25.6989	0.764275		18.404	0.950642					90.3452	0.950642
68.6429	0.937293		5.02588	0.609679					139.93	0.609679
0.108766	-0.119322		0.00343666	-5.77762e-05					120.09	-5.77762e-05
3.12933	0.138251		20.3939	0.982235					82.5576	0.982235
2.61371	0.0652219		13.7422	0.886341					98.5849	0.886341
14.6286	0.718686		28.6534	0.998595					92.939	0.998595
3.86654	0.245683		5.70838	0.95304					119.557	0.95304
15.2736	0.718436		14.1731	0.958056					1.28723	0.958056
7.62911	0.58893		2.6057	-0.107421					159.251	-0.107421
11.9022	0.78914		2.62226	0.116025					92.2752	0.116025
3.16228	-0.787992		3.73673	0.501822					76.1793	0.501822
1.43711	-0.00618809		6.18489	0.916061					77.8626	0.916061
11.5131	0.921118		18.3961	0.996512					104.063	0.996512
2.21609	-0.0979368		2.3952	-10.1903					57.0963	-10.1903
23.7126	0.694521		2.30436	0.0326474					111.625	0.0326474
18.0998	0.69478		3.22714	0.848192					112.79	0.848192
2.56558	-1.51616		20.853	0.984441					66.4066	0.984441
2.92258	-0.300536		14.0392	0.968565					77.6239	0.968565
4.47095	0.0394581		2.22532	-1.39266					NaN	-1.39266
6.79577	-1.48669		13.1472	0.650118					1.64675	0.650118
0.00550571	-0.053883		16.4415	0.992411					95.5102	0.992411
13.0078	0.914397		11.2382	0.284909					78.9921	0.284909
4.87523	0.027503		2.15603	-0.266132					NaN	-0.266132
1.26702	-0.0192031		0.0975011	-0.146975					11.1147	-0.146975
7.57146	0.824314		33.0519	0.989951					85.7585	0.989951
12.3273	0.788264		27.2817	0.999034					98.5892	0.999034
3.10658	0.1321		3.16228	-14.4609					11.483	-14.4609
3.16228	-0.804255		14.3888	0.994272					84.442	0.994272
2.38769	0.0560018		3.16228	-10.966					93.8025	-10.966
17.9717	0.895614		0.010328	-0.000300255					10.53	-0.000300255
3.80203	0.0838369		5.60911	0.828131					32.0641	0.828131
15.7261	0.516781		5.24215	0.643452					69.8895	0.643452
10.6981	0.741908		22.4775	0.987308					90.88	0.987308
6.98713	-0.940697		2.54388	0.19142					10.105	0.19142
7.31184	0.988788		0.000150654	-0.000460801					4.6142	-0.000460801
15.1064	0.853157		36.6797	0.998908					91.5307	0.998908
1.21364	-0.00790158		8.68989	0.971045					33.9557	0.971045
0.00571676	-0.233994		7.1401	0.940184					126.721	0.940184
26.896	0.530052		20.5606	0.658956					69.8425	0.658956
0.0889927	-0.285987		2.53757	-2.96229					46.6909	-2.96229
14.7698	0.44674		19.13	0.98248					103.17	0.98248
12.4637	0.270695		6.29995	0.968535					125.15	0.968535
5.28596	-0.183839		15.0721	0.989681					4.60986	0.989681
2.37758	-2.28378		7.23283	0.686358					85.6213	0.686358
2.36992	0.00338448		12.1714	0.802511					75.1913	0.802511
1.36437	-0.254209		16.6766	0.935876					70.9535	0.935876
5.18697	0.300465		2.59576	-0.0573965					93.2134	-0.0573965
13.5837	0.84929		2.23246	-6.43479					NaN	-6.43479
5.99911	0.905159		2.39708	-7.87591					136.691	-7.87591
4.13377	-0.132115		22.1231	0.999605					93.9515	0.999605
2.01879	-0.140485		3.34145	-0.241779					125.391	-0.241779
8.27514	0.431429		0.00728787	-4.3074e-07					112.102	-4.3074e-07
12.7895	-0.288782		13.9432	0.960606					108.376	0.960606
37.3887	0.994834		6.43651	0.590764					168.697	0.590764
3.16228	-0.268313		25.5983	0.944425					65.0674	0.944425
5.09516	0.0786725		2.79333	0.631328					112.925	0.631328
10.7991	0.921054		3.88047	0.88961					49.7253	0.88961
0.158114	-0.345539		13.1721	0.946198					94.8651	0.946198
27.6929	0.98728		14.2879	0.942301					58.9984	0.942301
2.76052	-0.0204964		5.21129	0.821936					63.762	0.821936
10.8937	0.742663		1.64277	-2.21287					NaN	-2.21287
6.49166	0.288807		22.2138	0.905746					70.9861	0.905746
5.90733	-1.33105		14.0894	0.963283					70.8871	0.963283
47.7539	0.977787		26.4913	0.935153					53.9441	0.935153
14.5769	0.973323		2.37854	-1.13769					65.8617	-1.13769
2.23093	-0.00582776		10.1221	0.97869					106.071	0.97869
3.16228	-0.2381		28.4245	0.88414					19.5745	0.88414
7.48755	0.718324		2.27086	0.0209831					66.8679	0.0209831
20.0462	0.954692		6.74079	0.992716					95.1969	0.992716
2.53533	-0.446032		8.36567	0.980152					67.3667	0.980152
0.000172652	-0.00786647		3.16228	-0.0214921					42.0933	-0.0214921
10.4145	0.778316		12.4448	0.984992					81.0943	0.984992
2.2038	-0.214665		11.2804	0.952247					108.735	0.952247
0.0854553	-0.160877		21.7902	0.919329					93.0766	0.919329
10.0975	0.600761		5.78303	0.855569					80.9814	0.855569
8.77781	0.690254		9.0632	0.986912					52.698	0.986912
1.36408	-0.0575838		17.5417	0.959863					80.7371	0.959863
10.3529	0.767472		48.4175	0.99922					143.207	0.99922
7.82571	0.63159		22.9404	0.996482					139.741	0.996482
3.16228	-0.300616		4.62837	0.0180717					53.0585	0.0180717
5.43364	0.0679901		18.6277	0.973424					105.903	0.973424
0.00809557	-0.0287534		7.39515	0.937283					124.23	0.937283
1.00478	-0.00390251		23.4941	0.990469					97.1005	0.990469
2.35209	-3.9799		9.59939	0.968793					89.9496	0.968793
4.46197	-1.29028		25.1852	0.963312					109.408	0.963312
1.97763	-0.0548666		26.3079	0.994993					91.2055	0.994993
15.7916	0.581165		19.196	0.995482					106.576	0.995482
0.000152121	-0.00695479		2.3936	-1.35539					137.196	-1.35539
3.30143	0.0628136		18.6346	0.997					94.3928	0.997
9.2679	-0.870021		27.9265	0.994134					97.7099	0.994134
14.0642	0.993856		20.5604	0.999049					119.641	0.999049
2.73597	-0.288381		6.01078	0.061971					36.1734	0.061971
5.95831	-1.05623		6.81337	0.939379					78.0265	0.939379
1.14272	-0.0310199		8.43627	0.87436					66.9776	0.87436
0.00575369	-0.000294236		28.6384	0.999706					113.352	0.999706
7.5639	0.350629		7.00353	-0.454776					144.83	-0.454776
19.5463	0.812407		7.45022	0.901603					46.8768	0.901603
0.227487	-0.104258		16.3045	0.947202					89.05	0.947202
6.7566	0.58132		2.39224	-0.982286					96.0899	-0.982286
3.16228	-0.877686		1.18405	-0.0288874					1.87675	-0.0288874
6.66363	0.139943		17.4418	0.997231					98.7775	0.997231
17.1856	0.773961		11.0948	0.997551					87.0979	0.997551
5.45191	0.887394		2.35	-15.7538					95.7403	-15.7538
2.2014	-0.00194433		7.5218	0.471172					97.8806	0.471172
16.6804	0.243109		22.5749	0.992089					69.3762	0.992089
1.07585	-0.0217493		2.49125	-1.63329					63.5007	-1.63329
2.91707	-0.252852		2.42559	-2.74642					15.0862	-2.74642
3.16228	-4.59823		22.5823	0.965666					91.4978	0.965666
17.2059	0.656576		11.784	0.896815					121.522	0.896815
18.9596	0.941064		2.76526	0.0566183					140.04	0.0566183
3.16228	-18.3714		10.5695	0.898163					23.3682	0.898163
0.000150007	-0.000447697		6.74061	0.976914					173.73	0.976914
0.00280193	-0.0104976		2.94593	0.254311					83.5166	0.254311
3.16228	-71.8529		8.01789	0.888342					90.5906	0.888342
3.6928	-0.571356		0.0226065	-0.107998					105.198	-0.107998
1.77772	-0.0168262		3.16228	0.485449					60.5311	0.485449
6.656	-1.31992		2.36439	-0.00956503					166.522	-0.00956503
5.19084	0.972173		2.47259	-1.59531					106.711	-1.59531
0.160156	-0.281764		11.3381	0.983376					89.5256	0.983376
3.16228	-0.276884		16.6568	0.995422					102.487	0.995422
3.16228	0.0566366		17.5544	0.912332					103.867	0.912332
2.87067	0.08554		21.9056	0.998809					99.5334	0.998809
2.46502	-2.19737		14.4248	0.981141					76.5395	0.981141
6.01552	-0.666999		6.95808	0.847021					171.843	0.847021
5.07085	0.294103		29.6545	0.997566					114.282	0.997566
3.16228	-0.276704		23.1672	0.992077					67.8758	0.992077
5.7634	0.736223		9.46558	0.990368					106.709	0.990368
3.16228	-0.605945		23.7182	0.99245					109.891	0.99245
3.16228	-0.0398699		2.84174	0.192337					35.9314	0.192337
8.75797	0.47181		5.44124	0.0849456					75.8034	0.0849456
4.35739	0.600288		15.1801	0.985196					119.235	0.985196
0.0829706	-0.205158		16.9015	0.981136					104.416	0.981136
10.7426	0.992835		12.9017	0.965287					88.5268	0.965287
16.9059	0.916182		4.29233	0.0832025					33.2773	0.0832025
2.34239	-8.30294		0.00444199	-0.00034811					126.843	-0.00034811
16.8201	0.593064		10.1286	0.948281					132.522	0.948281
6.37502	0.562044		15.5642	0.8409					31.616	0.8409
16.3357	0.944569		20.4028	0.98549					89.4424	0.98549
4.00141	0.188999		5.17357	0.910263					176.982	0.910263
5.21677	0.290657		2.52561	-0.590106					106.168	-0.590106
3.16228	-3.99736		2.30752	-2.89811					42.7332	-2.89811
2.7349	-0.527789		6.37212	0.949749					23.6246	0.949749
1.86978	-0.368598		19.8929	0.956876					100.915	0.956876
11.4115	0.986728		2.49088	-1.4238					41.8146	-1.4238
2.16511	0.0095703		14.0671	0.988604					61.7088	0.988604
1.24871	-0.194929		2.51623	-0.0199947					91.8158	-0.0199947
12.5952	0.770017		4.57766	0.4422					101.111	0.4422
7.12043	0.366359		10.7219	0.995152					87.4127	0.995152
8.51784	-0.655546		6.94105	0.929965					86.2144	0.929965
14.262	0.988071		24.2411	0.998505					91.2879	0.998505
13.8224	0.957839		10.9595	0.996012					85.3244	0.996012
5.8719	0.413709		16.7081	0.76895					77.8543	0.76895
1.92275	-0.0435055		7.95511	0.994838					140.988	0.994838
0.0133312	-0.00864131		27.6545	0.980059					118.928	0.980059
18.327	0.868927		30.5656	0.954054					111.772	0.954054
18.532	0.840306		17.753	0.981986					60.9275	0.981986
0.0962946	-0.514664		14.3449	0.979678					60.7142	0.979678
5.24694	0.208025		0.0100047	-0.0152171					125.28	-0.0152171
24.035	0.923985		18.763	0.99087					86.6093	0.99087
8.15064	0.318851		7.8105	0.560476					100.268	0.560476
3.69246	0.0469468		11.0028	0.994626					97.6003	0.994626
0.67199	-0.00457247		13.7043	0.977033					96.2644	0.977033
9.38694	0.984786		22.1667	0.989661					86.2729	0.989661
0.0107033	-0.0196898		1.70232	-21.5746					29.2088	-21.5746
4.98511	-0.206797		5.22926	0.953859					115.65	0.953859
0.0107988	-0.0296591		30.3856	0.991727					91.7959	0.991727
1.4158	-0.00354126		14.4314	0.996148					98.8133	0.996148
4.32591	0.672054		10.8842	0.967241					92.1549	0.967241
2.87429	-0.0431875		3.12499	0.829734					71.5343	0.829734
17.8524	0.924665		21.5473	0.969336					91.3699	0.969336
3.77794	-0.19365		10.6806	0.994258					110.669	0.994258
0.00499259	-0.041468		27.0649	0.996092					110.906	0.996092
0.0132138	-0.0138676		8.434	0.985986					89.4184	0.985986
19.0937	0.991005		16.8949	0.948436					107.71	0.948436
14.5344	0.9537		15.9641	0.998696					101.835	0.998696
14.0564	0.592535		3.16228	-18.1464					114.553	-18.1464
4.86637	-0.698492		0.00119063	-2.73837e-05					68.6952	-2.73837e-05
0.00015001	-0.00774854		24.889	0.996592					113.8	0.996592
6.86318	-0.801939		23.0658	0.996302					90.4719	0.996302
2.46417	-1.46146		25.9866	0.997069					50.6596	0.997069
22.9196	0.731717		17.4944	0.990863					106.716	0.990863
0.000149012	-0.0131462		2.27505	-0.461659					NaN	-0.461659
11.6593	0.925798		18.8723	0.998848					104.219	0.998848
0.0325644	-0.0387211		19.6071	0.991578					118.348	0.991578
2.3603	-0.23592		9.94743	0.995294					106.61	0.995294
3.16228	-0.527695		13.3241	0.990644					88.5531	0.990644
3.28417	-1.11686		4.87309	0.541181					114.719	0.541181
5.47529	-0.839001		1.98748	-0.201828					15.3529	-0.201828
1.3833	-0.0246725		12.4337	0.992612					105.008	0.992612
17.2973	0.993774		22.4522	0.99214					112.555	0.99214
0.00423592	-0.000574502		3.759	0.931241					166.126	0.931241
3.16228	-4.82722		2.48675	-1.56066					70.1116	-1.56066
0.00672021	-0.0881478		21.5112	0.994554					100.275	0.994554
11.1025	0.77534		34.1238	0.966688					101.002	0.966688
21.9683	0.908477		7.97528	0.268449					98.6771	0.268449
2.92736	0.485607		3.16228	-3.06147					31.5422	-3.06147
2.55015	0.208484		15.1955	0.991729					8.86004	0.991729
6.24942	0.51806		43.0264	0.976563					86.7116	0.976563
12.4231	0.99579		2.44112	-0.866913					39.4085	-0.866913
20.3098	0.958523		18.6202	0.978811					110.111	0.978811
13.4935	0.781153		2.31845	-0.998692					NaN	-0.998692
0.00239421	-0.033316		27.5651	0.998057					100.506	0.998057
9.15284	0.56909		25.9441	0.933946					102.319	0.933946
11.5383	0.912069		2.49718	-3.91324					117.766	-3.91324
11.5673	0.978563		9.92938	0.981206					100.753	0.981206
22.7764	0.879965		0.00908276	-0.000481115					79.4437	-0.000481115
9.9558	-0.111144		20.3781	0.992682					99.3314	0.992682
0.158114	-0.718001		6.54594	0.608365					148.795	0.608365
7.16351	0.52489		20.4345	0.954072					158.82	0.954072
15.1872	-0.274192		4.71039	0.458352					86.9669	0.458352
2.48126	-1.68934		14.8682	0.952453					52.6401	0.952453
0.0747585	-0.287862		1.727	-0.110212					97.8069	-0.110212
4.71371	0.0654161		7.36882	0.938089					29.678	0.938089
11.5458	0.625423		8.46345	0.886992					91.387	0.886992
1.05401	-0.0083054		18.6238	0.989369					117.832	0.989369
4.72357	0.463132		8.7385	0.965525					87.5515	0.965525
12.1354	0.725341		13.4718	0.953847					49.0573	0.953847
23.1821	0.888935		3.16228	0.640949					75.1993	0.640949
10.2007	0.645108		10.9175	0.997691					114.355	0.997691
9.16407	0.514899		12.5287	0.929965					107.181	0.929965
2.76085	0.0118035		20.0264	0.997041					95.8299	0.997041
0.00562031	-0.00137169		4.72761	0.0865353					80.9169	0.0865353
3.16228	-3.71878		12.9891	0.996553					101.592	0.996553
7.96478	0.949741		25.8471	0.976158					57.0531	0.976158
7.02952	0.267638		6.12051	0.600443					179.321	0.600443
18.1534	0.841692		15.9213	0.989883					107.628	0.989883
15.4596	0.787925		2.6238	0.0398591					89.6609	0.0398591
6.57412	0.16278		21.1064	0.999241					92.7673	0.999241
3.16228	-1.44261		0.0996095	-0.129089					17.3638	-0.129089
12.5596	0.915373		4.15848	0.951516					6.44641	0.951516
3.84012	0.351623		18.3783	0.998296					116.286	0.998296
3.81879	0.119095		0.00918464	-1.79542e-05					65.0357	-1.79542e-05
0.000802493	-0.000653349		2.65183	0.120665					89.4718	0.120665
8.62617	0.550947		0.0892557	-0.103277					15.8946	-0.103277
6.34339	0.877741		31.937	0.994452					49.8122	0.994452
3.12871	-0.645298		23.6143	0.994711					99.0932	0.994711
21.2039	0.990382		9.43847	0.875079					93.7201	0.875079
5.06515	0.232359		12.9653	0.988243					109.749	0.988243
0.00496359	-0.000627835		23.5689	0.954998					105.393	0.954998
3.28333	-0.0086107		23.5883	0.988482					146.549	0.988482
7.37705	0.409686		15.0261	0.722583					111.613	0.722583
5.15909	0.406852		5.95216	0.83228					168.393	0.83228
4.02148	-1.01425		20.6224	0.803086					80.5898	0.803086
14.2254	0.208586		14.8267	0.996933					108.865	0.996933
3.16228	-0.396426		9.36037	0.681142					67.6829	0.681142
32.7931	0.990562		18.3598	0.994507					95.3468	0.994507
5.1794	0.417652		2.46648	-0.498587					39.7441	-0.498587
8.44661	0.335668		20.5568	0.990456					85.3301	0.990456
3.38268	-0.189217		21.3582	0.998529					95.7011	0.998529
6.11666	0.125134		9.0014	0.987931					96.2882	0.987931
5.48564	0.309648		18.2218	0.9994					70.5886	0.9994
11.569	0.334717		9.79712	0.147048					67.6829	0.147048
17.8201	0.951025		10.24	0.930355					158.941	0.930355
11.3474	0.502275		48.5899	0.999904					114.946	0.999904
2.3409	-96.6083		29.4663	0.992677					77.6401	0.992677
5.22492	0.0781731		36.6365	0.999175					71.8804	0.999175
2.44237	0.0275253		3.90478	0.397381					100.304	0.397381
8.04757	0.347248		11.8291	0.929669					101.681	0.929669
0.0048532	-0.000329994		10.1858	0.730446					85.145	0.730446
7.32291	0.947027		18.4862	0.987199					88.9955	0.987199
1.27584	-0.00420103		12.7603	0.956617					141.154	0.956617
12.5163	0.992819		23.0419	0.971025					97.1944	0.971025
4.87906	0.0482643		17.0808	0.997396					93.352	0.997396
1.7345	-0.085159		10.6806	0.989491					105.522	0.989491
14.7625	0.963581		13.3227	0.964132					88.2615	0.964132
1.65814	-0.00428572		18.4169	0.992042					121.15	0.992042
0.588892	-0.00349999		11.9854	0.905418					79.2388	0.905418
21.8782	0.862485		31.6744	0.998362					103.962	0.998362
0.00393626	-0.000838482		10.1229	0.997848					15.919	0.997848
2.46454	-0.0618794		22.1996	0.985804					81.9386	0.985804
0.00479681	-0.000726109		17.1359	0.799296					107.499	0.799296
10.1648	0.332183		13.4295	0.940385					104.275	0.940385
9.84993	0.460664		25.6097	0.999332					102.766	0.999332
10.171	0.966523		15.3468	0.875349					74.6522	0.875349
9.82148	0.419377		15.4267	0.990482					86.6931	0.990482
4.19515	-0.0693279		6.01162	0.957765					148.674	0.957765
15.5259	0.68941		19.9915	0.998688					104.088	0.998688
9.43644	0.739874		21.799	0.95662					103.448	0.95662
2.24078	-1.04488		12.881	0.91812					56.2191	0.91812
3.07191	-0.132082		18.4455	0.994115					83.3399	0.994115
3.30818	-0.924646		4.72857	0.694156					118.211	0.694156
3.16228	-1.95278		1.16207	-0.140382					176.138	-0.140382
1.7432	-9.87927		7.85863	0.98					97.5102	0.98
0.00212599	-0.000986201		18.9442	0.849006					71.6329	0.849006
0.205312	-0.118796		26.2676	0.999782					94.7864	0.999782
2.79226	0.00583814		3.16228	-0.45044					NaN	-0.45044
12.4812	-0.390739		15.6574	0.840168					40.3338	0.840168
5.78488	0.429143		28.9906	0.99795					64.0883	0.99795
1.87747	0.0107838		3.25492	-0.0685335					141.279	-0.0685335
0.00662459	-0.329747		4.34765	0.634029					59.6202	0.634029
16.2067	-0.292143		10.1381	0.939495					126.909	0.939495
11.1395	0.287502		28.1552	0.997487					89.7603	0.997487
6.3838	0.455838		0.00330576	-0.00768363					63.9446	-0.00768363
16.9027	0.26276		0.158114	-0.238318					168.761	-0.238318
22.106	0.964625		25.3333	0.967198					92.4178	0.967198
6.9705	0.532018		2.37654	-41.3866					84.5906	-41.3866
0.718963	-0.00101605		2.46449	-2.53342					124.482	-2.53342
9.01477	-0.0464254		23.1924	0.983059					94.1361	0.983059
27.973	0.945877		2.44465	-0.542763					92.3527	-0.542763
2.38021	-6.07668		0.320586	-0.867863					166.129	-0.867863
4.00815	0.131914		2.51104	0.118037					147.22	0.118037
6.82892	0.881943		21.2966	0.995773					98.2734	0.995773
7.62073	0.57311		7.62889	0.98694					95.6233	0.98694
3.16228	-0.702998		9.11281	0.979687					102.083	0.979687
14.8803	0.86463		4.43874	0.34282					84.9946	0.34282
6.08867	0.414917		16.7171	0.988525					110.924	0.988525
0.00722402	-0.00142359		10.8371	0.905609					112.909	0.905609
4.30804	0.0915875		14.0994	0.990472					105.64	0.990472
4.50332	-0.00600635		17.6824	0.99534					88.7171	0.99534
0.000161795	-0.00157427		9.76842	0.732423					111.916	0.732423
5.6925	-0.360338		9.63432	0.984076					60.0441	0.984076
0.00904841	-0.000477072		21.07	0.826245					129.271	0.826245
0.010252	-0.0156306		13.6793	0.853725					85.5589	0.853725
3.16228	-0.501002		4.62566	0.915335					5.67683	0.915335
9.02905	0.389876		2.82601	0.692829					41.8785	0.692829
7.17223	0.572618		14.1156	0.993719					1.62869	0.993719
3.16228	-2.40333		0.00683264	-0.000557579					87.876	-0.000557579
2.8116	0.102383		8.10937	0.858394					108.879	0.858394
0.100536	-0.386193		3.63477	0.407052					99.2368	0.407052
0.592087	-0.00807669		12.3685	0.916801					178.717	0.916801
2.32634	-23.9324		31.4906	0.998662					72.6742	0.998662
3.16228	-0.142064		2.47424	-0.975642					136.064	-0.975642
0.000158841	-0.0005316		18.9147	0.930164					105.872	0.930164
3.52701	0.0535305		2.2562	-100.814					NaN	-100.814
3.13023	-0.137141		12.4082	0.994265					70.2821	0.994265
3.59085	-0.00518144		19.8973	0.970954					97.9626	0.970954
0.189223	-0.208843		27.8961	0.983069					99.0326	0.983069
0.000150392	-0.0057503		12.2101	0.987243					179.401	0.987243
4.47513	-0.498407		23.1912	0.893489					93.9078	0.893489
3.16228	-4.5516		2.47913	-0.659904					114.002	-0.659904
3.59436	0.0202418		9.91954	0.988553					38.883	0.988553
3.16228	-0.384008		12.0113	0.908908					175.834	0.908908
14.4968	0.575048		14.0565	0.959189					22.84	0.959189
37.6693	0.928721		22.2469	0.945975					23.661	0.945975
2.83982	0.578313		0.142555	-0.190321					91.8685	-0.190321
0.00334572	-0.00159756		0.0696428	-0.0585774					90.3845	-0.0585774
9.46814	-0.121658		5.80449	0.689213					167.653	0.689213
7.02527	0.479712		9.7291	0.744713					127.302	0.744713
4.74523	0.0629008		4.3927	0.979861					123.175	0.979861
8.22144	0.629642		22.2363	0.992785					92.0835	0.992785
8.74148	0.793056		10.0416	0.989601					86.4427	0.989601
1.66539	-0.0560737		26.9756	0.995256					87.6669	0.995256
4.38582	0.810416		0.000504593	-0.000341051					137.951	-0.000341051
9.80938	0.947435		16.7792	0.951857					97.0076	0.951857
3.05278	0.132503		14.1381	0.969935					120.503	0.969935
2.10061	0.00685261		18.0022	0.989375					113.777	0.989375
5.60445	0.105781		12.5891	0.958013					78.2173	0.958013
5.26836	0.213956		6.65615	0.621772					89.4848	0.621772
9.63026	0.92793		22.3808	0.982901					88.0561	0.982901
1.36692	-0.0178889		13.8864	0.84087					101.835	0.84087
0.0650511	-0.229656		14.5609	0.97288					108.348	0.97288
1.10392	-0.0313492		4.8505	0.930121					122.24	0.930121
4.3312	0.131661		2.31806	-86.0457					161.612	-86.0457
2.76652	0.0209176		20.4658	0.990536					90.9873	0.990536
21.6082	0.867796		5.23857	0.648225					55.7372	0.648225
0.0063035	-0.020134		15.8837	0.970589					62.9801	0.970589
2.47062	-1.00933		5.37562	0.33629					76.1039	0.33629
11.8797	0.65501		17.5335	0.987987					72.9417	0.987987
23.2044	0.980164		7.49972	0.837034					98.1773	0.837034
3.16228	-0.211935		11.7465	0.89301					104.43	0.89301
14.9013	0.745193		5.82932	0.0483896					174.455	0.0483896
0.325012	-0.00538255		6.36237	0.829949					135.006	0.829949
2.42372	-0.0281444		11.6664	0.890553					140.009	0.890553
20.2744	0.830445		16.9371	0.996834					113.459	0.996834
0.175288	-0.23947		14.2401	0.99084					130.711	0.99084
12.6896	0.625543		3.16228	-2.47315					167.118	-2.47315
2.3876	-1.76562		21.2615	0.998437					106.049	0.998437
1.32557	0.0317905		6.23847	0.98004					36.9199	0.98004
5.72367	0.14255		13.1335	0.90915					79.4451	0.90915
3.16228	-34.3016		24.5478	0.998215					96.1192	0.998215
3.50976	-0.0187477		11.997	0.995524					85.6568	0.995524
4.99422	0.813892		24.0895	0.968443					73.5736	0.968443
11.2869	0.709053		9.18731	0.930697					95.4858	0.930697
2.05353	-0.1449		7.20799	0.726633					62.4147	0.726633
0.349915	-1.91468		12.6658	0.982384					35.8429	0.982384
7.25053	0.483375		8.70668	0.991202					174.596	0.991202
0.000149662	-0.000532679		5.79082	0.902833					126.92	0.902833
3.13687	-0.136396		5.02974	0.305074					112.631	0.305074
3.16228	-0.77811		14.2726	0.989336					15.2536	0.989336
0.00709336	-0.0231312		11.4853	0.992588					84.7773	0.992588
19.973	0.910366		14.4168	0.964986					99.6124	0.964986
6.09528	0.210581		1.62343	-0.00168843					91.4823	-0.00168843
3.16228	-0.766493		24.0196	0.995799					85.7663	0.995799
5.40276	-0.300043		13.0553	0.762464					69.803	0.762464
0.0080182	-1.12942e-05		3.16228	0.738021					172.237	0.738021
3.55833	0.101802		6.7767	0.825703					78.7456	0.825703
19.1129	0.99716		6.76879	0.978378					37.4819	0.978378
16.7943	0.886067		4.66243	0.890148					40.9556	0.890148
3.15625	0.190635		16.4055	0.960141					79.1931	0.960141
1.97809	-0.0118615		30.4725	0.999441					101.029	0.999441
20.8833	0.965611		6.16436	0.0304185					155.828	0.0304185
7.75714	0.963733		12.0317	0.995592					114.99	0.995592
0.154509	-0.306811		12.6821	0.991498					69.6597	0.991498
6.05221	-1.54687		13.8902	0.972741					133.658	0.972741
1.62101	-0.699333		0.00046539	-0.00185604					112.365	-0.00185604
0.0329925	-0.256098		10.6053	0.992665					36.5029	0.992665
11.9056	0.946873		8.99841	0.79292					132.037	0.79292
1.94271	-0.19629		3.16228	0.736189					138.93	0.736189
19.0336	0.940876		24.749	0.996975					86.9972	0.996975
7.42732	0.874825		2.3498	-28.9583					3.80621	-28.9583
25.2543	0.990204		4.73711	0.92224					58.3138	0.92224
0.163304	-0.0108103		6.52742	0.991776					97.7111	0.991776
11.0783	0.930459		3.38581	0.854825					56.7284	0.854825
1.15365	-0.0392153		5.13721	0.987836					42.5405	0.987836
3.71126	-0.574261		3.46422	0.419578					122.496	0.419578
8.93837	0.167227		14.5349	0.996211					96.6614	0.996211
5.45752	0.769502		22.3034	0.975585					87.1991	0.975585
3.4018	0.0298862		5.75133	0.51403					57.3694	0.51403
9.6679	0.736461		22.0982	0.999145					79.3806	0.999145
2.44025	-0.679385		4.57153	0.929201					175.465	0.929201
0.622151	-0.000148253		16.6373	0.997649					96.6614	0.997649
13.9212	0.920218		7.33943	0.666558					83.3103	0.666558
2.6477	0.0244724		26.0788	0.998698					110.22	0.998698
3.16228	-0.400772		24.5856	0.998121					113.354	0.998121
12.0999	-0.390718		12.1124	0.964641					111.723	0.964641
3.16228	-1.23072		18.713	0.974425					53.3613	0.974425
7.70915	0.674869		14.0505	0.991047					79.1185	0.991047
8.07359	0.205759		13.5785	0.847929					23.8328	0.847929
6.60701	0.909156		22.7863	0.981826					74.9825	0.981826
3.69103	0.589711		18.6888	0.981284					66.8267	0.981284
8.544	0.925612		11.1903	0.988742					107.352	0.988742
3.05227	-0.220889		9.43442	0.990794					82.9503	0.990794
0.0805257	-0.648439		19.6389	0.922211					71.5852	0.922211
11.6238	0.797591		16.4727	0.996125					71.7636	0.996125
4.24298	0.900037		4.51398	0.956048					43.9024	0.956048
6.37958	0.949119		16.2489	0.995013					129.286	0.995013
0.00238531	-0.0133796		11.2701	0.989198					116.106	0.989198
9.11583	0.769124		27.0217	0.998953					104.025	0.998953
0.00303543	-0.000626455		7.41394	0.996625					68.3649	0.996625
20.293	0.769678		20.4443	0.990411					92.2484	0.990411
4.80175	0.127978		3.58988	0.742981					29.8993	0.742981
7.14255	0.0328285		0.0698795	-0.070442					119.118	-0.070442
5.70365	0.541322		0.000150025	-0.0607489					51.2349	-0.0607489
14.9043	0.579654		22.2132	0.997878					95.0994	0.997878
35.2518	0.98095		8.15051	0.9198					59.4938	0.9198
10.3344	0.935401		13.4122	0.955831					92.7146	0.955831
4.30128	-0.942872		17.246	0.987131					82.4437	0.987131
8.18681	0.228806		15.004	0.892321					85.4188	0.892321
3.6454	-0.217622		9.29463	0.414933					86.2234	0.414933
19.9409	0.597519		16.6577	0.844355					81.8303	0.844355
4.84098	0.160979		18.992	0.98158					82.8895	0.98158
6.44943	-0.990547		10.3776	0.755728					139.371	0.755728
12.1292	0.975389		2.40575	-3.34122					146.121	-3.34122
6.79594	0.272495		15.2017	0.987189					81.0967	0.987189
2.62905	0.0830518		15.7967	0.595121					74.5463	0.595121
0.326444	-0.695668		2.26403	-0.785401					110.487	-0.785401
17.9363	0.702263		14.2191	0.997525					75.211	0.997525
5.55063	0.106799		2.35731	-45.6096					14.7833	-45.6096
0.218917	-0.612451		9.99973	0.993536					56.3031	0.993536
2.72769	-0.715908		3.84566	0.177426					16.2025	0.177426
5.82921	0.509051		29.615	0.982078					96.3934	0.982078
0.00312861	-0.00851862		3.85934	0.115886					60.0742	0.115886
7.45947	0.762206		5.8774	0.867705					130.515	0.867705
1.87515	-0.120141		6.73075	0.909221					63.7008	0.909221
18.9315	0.901339		12.5671	0.974787					108.396	0.974787
0.00426591	-0.0276689		7.65241	0.869937					86.9603	0.869937
29.7514	0.87692		8.36924	0.649438					134.883	0.649438
0.321514	-0.360053		30.8887	0.998898					100.498	0.998898
1.23247	-0.0090767		6.77359	0.980573					164.503	0.980573
6.78298	0.28256		8.28224	0.946681					97.3795	0.946681
3.16228	0.12481		2.21209	-5.68246					NaN	-5.68246
11.9442	0.80047		22.917	0.99318					87.6728	0.99318
4.27874	0.869666		25.5965	0.936351					112.634	0.936351
3.72197	0.0492784		7.75155	0.976054					83.0145	0.976054
0.0455798	-0.0876222		25.9893	0.997256					86.6315	0.997256
6.79941	0.593322		7.43315	0.992812					100.498	0.992812
11.9517	0.901475		35.5882	0.991046					78.8368	0.991046
1.47532	-0.146789		6.4219	0.9945					115.229	0.9945
4.16414	0.113058		26.3777	0.781907					74.3591	0.781907
13.2462	0.659486		1.92898	0.0717079					66.9441	0.0717079
7.1001	0.919937		2.62835	0.356905					100.427	0.356905
6.69979	0.765855		14.4709	0.950423					73.284	0.950423
2.86962	-0.0887325		17.8971	0.973921					113.889	0.973921
3.13171	0.0225137		6.86316	0.99283					56.5984	0.99283
0.00797121	-0.00105359		2.65517	0.459652					57.448	0.459652
36.2392	0.941986		21.0655	0.962486					65.9913	0.962486
3.70862	-0.00380922		19.8351	0.992091					89.9511	0.992091
7.49422	0.853173		20.2685	0.969606					93.0387	0.969606
11.5688	0.784087		16.507	0.99648					89.005	0.99648
9.93936	0.507053		8.6317	0.913979					102.907	0.913979
7.25205	0.697597		7.69844	0.975812					109.857	0.975812
5.46168	0.717837		4.81879	0.192806					92.8037	0.192806
19.2252	0.754052		7.37862	0.973424					48.4576	0.973424
0.000162082	-0.00151477		16.6556	0.961174					101.1	0.961174
2.10718	-0.0250257		13.0377	0.990558					51.3455	0.990558
6.20824	0.129356		15.8291	0.983459					45.9266	0.983459
5.39225	0.279302		1.95208	0.0185235					129.603	0.0185235
8.94954	0.439864		4.89597	0.306458					29.1732	0.306458
13.9158	0.629012		9.14494	0.685427					93.6664	0.685427
3.68678	0.191357		19.1293	0.982254					84.6812	0.982254
0.00253328	-0.00507717		2.30128	-4.85728					114.669	-4.85728
4.50837	0.170573		2.9866	0.389431					95.2655	0.389431
5.51231	-1.82765		6.52628	0.773315					82.4362	0.773315
19.5415	0.953816		9.04345	0.995996					72.9946	0.995996
5.33936	0.406565		17.4871	0.954103					104.238	0.954103
4.4881	-0.0118503		4.20566	0.629967					109.393	0.629967
26.5612	-0.814425		19.7854	0.960241					89.2041	0.960241
4.16892	0.415101		0.0307973	-0.0234144					76.3648	-0.0234144
5.03994	-0.199876		3.16228	-16.4605					81.1058	-16.4605
0.65302	-0.00332376		7.54917	0.988608					46.9155	0.988608
0.00269845	-0.0976599		5.36278	0.311253					146.273	0.311253
10.3148	0.303291		5.23115	0.939839					48.5709	0.939839
0.00412744	-0.0115868		18.5511	0.996677					10.2551	0.996677
2.95823	-0.311905		6.01047	0.796405					118.043	0.796405
0.00886324	-0.028349		17.3012	0.757818					96.4894	0.757818
2.99982	-0.466171		21.1467	0.974355					109.677	0.974355
0.00980596	-0.00496749		2.3295	-25.018					171.501	-25.018
0.00471996	-0.0451408		14.7463	0.835885					53.0058	0.835885
0.00133958	-0.000473043		15.0184	0.900842					81.1614	0.900842
17.777	0.863188		0.0277282	-0.191263					14.7423	-0.191263
12.2838	0.399818		15.0307	0.885027					91.2439	0.885027
3.27954	0.307002		16.855	0.947457					92.0997	0.947457
4.88077	0.959968		14.1162	0.964282					82.4977	0.964282
3.16228	-5.96568		2.49162	0.0149004					169.613	0.0149004
0.000151997	-0.000182025		4.9625	0.834046					54.5964	0.834046
20.0707	0.856803		19.233	0.97778					86.4787	0.97778
2.45078	-3.45859		12.21	0.986587					99.357	0.986587
30.584	0.997244		5.26716	0.934508					33.1772	0.934508
12.1377	0.593059		10.4971	0.983316					43.8599	0.983316
0.00509794	-0.00462002		2.81009	0.469024					102.828	0.469024
6.71364	0.172393		6.4835	0.992352					43.2911	0.992352
3.16228	-0.111823		22.2047	0.996705					84.393	0.996705
4.17183	0.657247		9.59732	0.890835					66.7382	0.890835
2.47278	-0.474811		10.7741	0.902148					91.0306	0.902148
2.09329	-0.0211579		3.13534	0.888516					172.955	0.888516
13.0139	0.483419		2.00673	0.0362751					64.0628	0.0362751
18.5546	0.974893		5.02061	0.978599					157.943	0.978599
3.16228	-3.41001		3.16228	-2.55833					79.2888	-2.55833
0.0063972	-0.270819		9.11184	0.994033					49.0577	0.994033
18.6342	-0.074248		30.4564	0.977834					87.373	0.977834
2.08804	-0.0210305		23.9264	0.997485					104.079	0.997485
6.46086	0.75133		11.5714	0.988652					77.0747	0.988652
3.16228	-1.89419		18.2384	0.974642					73.0853	0.974642
4.72168	0.567348		9.56471	0.804814					176.25	0.804814
20.0854	0.558338		31.2865	0.955159					64.5738	0.955159
2.63131	-0.560694		16.6762	0.938686					96.8015	0.938686
10.8761	0.931392		21.7259	0.978782					136.669	0.978782
0.348995	-0.570432		3.70275	0.390421					31.6048	0.390421
0.00224485	-0.000556541		22.677	0.952145					95.9068	0.952145
3.08896	0.0677575		20.3558	0.97819					115.049	0.97819
0.00442569	-0.0375671		24.3233	0.995191					106.197	0.995191
17.9372	0.767329		9.38548	0.797209					89.1239	0.797209
1.54705	0.00714962		15.5959	0.789929					106.591	0.789929
0.0066155	-0.00184556		0.774048	-0.00641315					170.092	-0.00641315
3.645	-0.779803		10.2745	0.820137					75.2628	0.820137
6.10468	0.0510189		9.64788	0.941763					31.4525	0.941763
11.5047	0.988708		2.58448	0.0563308					125.311	0.0563308
5.232	0.0873836		8.39313	0.752093					98.9255	0.752093
12.1616	0.810959		13.0885	0.989838					98.2439	0.989838
4.46236	0.572616		27.593	0.994343					105.873	0.994343
48.9639	0.977927		7.34663	-0.138901					90.7555	-0.138901
20.4376	0.980646		7.44471	0.907297					63.6324	0.907297
0.00668145	-0.0849684		15.3215	0.998156					83.901	0.998156
10.0515	0.497112		0.981347	-0.00088624					173.366	-0.00088624
0.00370485	-0.00145463		23.4903	0.995211					99.1494	0.995211
3.30728	0.129479		9.02905	0.851781					94.6757	0.851781
2.8216	-0.207553		2.14377	-0.314934					NaN	-0.314934
1.87269	0.00355157		14.8234	0.997139					94.7101	0.997139
5.08182	0.782984		21.6598	0.995604					97.1367	0.995604
15.4809	0.77177		12.0547	0.991528					83.3658	0.991528
3.16228	-1.14083		27.0001	0.970119					90.4908	0.970119
10.1306	0.740106		6.40812	0.961741					103.052	0.961741
0.108629	-0.458184		7.63666	0.975082					129.35	0.975082
5.07767	0.768858		11.4663	0.988661					62.8322	0.988661
0.00330818	-0.0165321		15.6059	0.999433					99.3108	0.999433
5.606	0.220577		12.4023	0.976109					85.0449	0.976109
10.3481	0.881656		0.00711566	-1.39067e-05					57.2586	-1.39067e-05
0.00912972	-0.00219544		23.8603	0.993775					79.0558	0.993775
0.00931991	-0.0274364		10.4465	0.992286					99.1948	0.992286
9.78213	0.754064		7.9082	0.784717					85.0704	0.784717
0.00330941	-6.09437e-05		10.8375	0.966585					89.8485	0.966585
7.06881	0.0530873		31.6853	0.996802					95.9303	0.996802
1.10032	-0.0559908		2.32094	-26.8736					12.7051	-26.8736
3.48698	0.111776		10.4108	0.971223					147.785	0.971223
4.26577	-0.808718		14.1867	0.703462					113.121	0.703462
41.09	0.390694		29.9429	0.998027					98.4984	0.998027
0.188248	-0.968715		22.2849	0.998541					92.7327	0.998541
6.616	0.80331		4.97115	0.320675					78.0563	0.320675
2.63541	0.138777		13.0193	0.974705					164.51	0.974705
2.83181	0.804207		6.5858	0.091622					171.747	0.091622
1.15661	-0.0290758		2.37959	-22.7228					178.368	-22.7228
0.312687	-0.00307827		2.47722	-0.848899					87.8112	-0.848899
0.00749574	-0.0050842		17.9725	0.998061					93.0059	0.998061
25.8692	0.83148		18.4291	0.996372					47.5057	0.996372
7.65608	0.682148		7.91461	0.83534					55.7809	0.83534
8.57768	0.756545		10.0925	0.975546					131.556	0.975546
6.08676	-0.102655		2.23607	#NAME?					NaN	#NAME?
2.93269	-0.714146		11.061	0.904338					88.1697	0.904338
11.2123	0.890921		5.99234	0.95101					145.849	0.95101
2.40249	-0.560743		16.1451	0.998172					105.117	0.998172
0.00281796	-0.129011		4.85859	0.356629					111.168	0.356629
0.273835	-0.53529		0.00423237	-0.0176216					110.941	-0.0176216
1.87254	-0.055132		13.1374	0.962268					121.774	0.962268
1.31914	-0.0069227		24.2788	0.997037					86.8181	0.997037
6.15201	0.318397		11.1581	0.902335					107.801	0.902335
6.35789	0.216526		14.6292	0.987353					108.529	0.987353
0.00814604	-0.0810559		2.93447	0.572002					87.9087	0.572002
3.317	-0.525358		11.4926	0.555949					109.675	0.555949
10.2474	0.448449		2.37959	-22.7228					92.9481	-22.7228
6.82679	0.470464		12.2406	0.987987					133.107	0.987987
5.50611	-0.771054		0.00225385	-0.000362114					10.5926	-0.000362114
3.88786	0.372085		16.0998	0.964517					99.5207	0.964517
9.37579	0.512992		2.45017	-1.60853					88.1697	-1.60853
6.08563	0.127455		0.0073113	-4.47002e-05					178.92	-4.47002e-05
3.33772	0.380094		3.93344	0.576219					58.4405	0.576219
6.51985	0.570625		27.3093	0.999337					84.1102	0.999337
16.7739	0.977688		5.96976	0.977661					154.263	0.977661
7.40193	0.472736		13.5923	0.989693					99.6776	0.989693
17.5217	0.975928		4.90077	0.780899					126.753	0.780899
29.7267	0.991749		6.50876	0.656359					90.0896	0.656359
13.0577	0.586573		0.00489683	-0.00684034					123.098	-0.00684034
8.6477	0.219202		7.13729	0.976755					69.0676	0.976755
5.10439	0.510252		25.4373	0.995392					70.1651	0.995392
5.72719	0.0264647		23.8873	0.99972					103.919	0.99972
3.16228	-2.83103		14.7947	0.991461					131.637	0.991461
0.234355	-0.342825		4.94625	0.240301					86.1703	0.240301
5.09314	0.665817		22.7921	0.994619					91.1632	0.994619
6.43231	0.443044		9.14684	0.921144					109.811	0.921144
2.57131	0.0240731		4.45207	0.823663					153.525	0.823663
19.6472	0.904591		8.14914	0.975522					47.2177	0.975522
10.7673	0.979856		0.000149252	-0.000110561					14.1841	-0.000110561
0.000149122	-0.000129237		2.26623	-0.524769					57.6414	-0.524769
2.55678	-1.00275		8.34639	0.955978					110.945	0.955978
4.08844	-1.04196		11.3465	0.978161					5.06266	0.978161
12.5901	0.283082		12.5799	0.715602					68.8659	0.715602
36.9495	0.930286		8.6655	0.874781					98.0686	0.874781
11.1969	0.469373		12.7766	0.878469					80.9174	0.878469
3.89733	0.626938		7.55238	0.875115					51.3576	0.875115
23.1207	0.697456		36.1745	0.981677					92.3794	0.981677
9.41705	0.0374562		9.41147	0.975834					48.719	0.975834
8.26447	0.838445		28.5776	0.975303					120.392	0.975303
0.258058	-0.855996		36.3235	0.993103					116.882	0.993103
3.16228	-16.1351		14.6309	0.711404					55.7459	0.711404
21.4055	0.986717		6.72496	0.935646					65.6777	0.935646
1.10013	-0.0779212		1.95131	0.0689233					75.4102	0.0689233
13.8413	0.895882		3.16228	-0.439515					33.299	-0.439515
5.17573	0.873942		14.5027	0.973341					82.5729	0.973341
8.94992	0.878996		7.85888	0.997564					175.045	0.997564
5.15182	0.0885294		6.2857	0.954744					139.403	0.954744
13.909	0.954092		13.37	0.91964					6.33933	0.91964
8.07178	-0.00255797		27.0542	0.999612					129.185	0.999612
3.1978	-0.117754		12.7529	0.983032					104.146	0.983032
3.92532	0.0756013		2.4142	-1.22934					158.192	-1.22934
7.90923	0.334512		10.9301	0.97955					83.6968	0.97955
13.845	0.419736		26.8985	0.991108					103.491	0.991108
16.1037	0.923114		9.37368	0.88911					101.894	0.88911
2.83962	-0.256947		30.9317	0.997585					101.092	0.997585
14.5045	0.840243		2.53226	-0.320765					96.6415	-0.320765
19.6887	-0.304859		18.586	0.967181					84.0488	0.967181
3.16228	-1.63127		18.846	0.993435					74.736	0.993435
3.78787	-0.341002		11.7401	0.776768					116.938	0.776768
0.00289533	-0.0575166		4.62113	0.901985					10.0154	0.901985
12.2194	0.431673		33.9177	0.998672					73.1095	0.998672
0.325577	-0.60852		8.96444	0.991764					95.5895	0.991764
0.0114745	-0.090991		4.69419	0.236927					4.67603	0.236927
7.17504	0.473984		19.8312	0.98574					90.8334	0.98574
14.4153	0.267391		17.2658	0.994846					73.7004	0.994846
41.2017	0.0384324		1.74524	-0.0227626					121.966	-0.0227626
2.54141	-0.306543		6.30944	0.896369					68.8362	0.896369
0.107821	-0.926021		34.9383	0.992792					127.031	0.992792
2.27334	-1.23659		13.7094	0.886564					135.481	0.886564
3.16228	-1.17268		2.92883	0.0718308					4.81259	0.0718308
0.000150453	-0.00266489		23.3755	0.908132					103.732	0.908132
0.7217	-0.0051488		3.16228	-1.04576					96.2354	-1.04576
2.84096	0.00392494		4.42497	0.254788					109.359	0.254788
0.925587	-0.0256781		21.9949	0.976208					53.7536	0.976208
4.11313	-0.161048		3.02018	0.0788332					151.123	0.0788332
11.1043	0.975982		7.18133	0.977129					97.9114	0.977129
49.2667	0.698262		3.81568	0.702739					31.5045	0.702739
0.0752377	-0.149543		8.65851	0.808212					90.7307	0.808212
1.1333	0.00344801		12.0406	0.819492					45.7307	0.819492
11.257	0.980395		8.79246	0.994637					97.186	0.994637
14.1217	0.86465		11.8579	0.858637					114.746	0.858637
8.63612	0.580943		4.52643	0.597397					52.7331	0.597397
13.8564	0.549886		12.5162	0.989674					89.6906	0.989674
4.96695	-1.07919		5.72524	0.871585					103.48	0.871585
2.10202	0.00795262		14.821	0.973096					110.067	0.973096
14.765	0.389713		28.2073	0.976864					105.956	0.976864
14.5188	0.643483		15.3141	0.993144					124.838	0.993144
43.0901	0.901519		9.27594	0.858217					78.4306	0.858217
3.31069	0.0416693		5.93934	0.89018					131.785	0.89018
0.00622099	-0.0419157		28.3129	0.998885					98.8338	0.998885
3.16228	-13.7215		4.47715	0.306482					118.877	0.306482
3.16228	-1.95927		9.3177	0.890885					49.4662	0.890885
7.93266	-0.704955		22.6749	0.975304					80.0114	0.975304
4.75317	0.0670852		0.0884285	-0.218602					121.682	-0.218602
10.3792	0.899542		7.04414	0.928964					11.9254	0.928964
2.30769	-18.1316		28.4248	0.990747					95.5504	0.990747
3.16228	-2.0379		31.6522	0.997877					54.8012	0.997877
8.41246	0.601488		23.4808	0.847629					115.855	0.847629
1.80658	-0.115474		12.8751	0.803668					61.2377	0.803668
1.17596	-0.0277862		34.9376	0.991566					5.41788	0.991566
0.16352	-0.466015		15.565	0.979344					82.0177	0.979344
23.804	0.823012		25.0449	0.994685					104.092	0.994685
2.47769	0.194178		8.99681	0.838317					107.654	0.838317
3.91864	-0.0867855		10.9907	0.964243					70.9855	0.964243
26.3401	0.986412		10.1638	0.88736					98.7647	0.88736
23.43	0.991086		27.8018	0.983831					94.6202	0.983831
0.20037	-0.481022		17.089	0.990877					136.203	0.990877
24.0957	0.423252		3.95442	0.886139					54.8666	0.886139
3.22909	-0.712051		10.6604	0.903471					15.2229	0.903471
7.82865	0.590553		3.5115	0.630898					175.868	0.630898
17.5098	0.961217		13.3988	0.984105					85.1805	0.984105
3.16228	-1.96763		20.3519	0.966227					130.156	0.966227
5.4164	0.500899		6.77175	0.665863					111.405	0.665863
3.16228	-3.21224		19.0751	0.976167					43.0451	0.976167
0.0251107	-0.00355775		2.34263	-0.661892					NaN	-0.661892
0.11067	-0.393149		10.0089	0.854004					67.5097	0.854004
4.00483	-1.09436		9.89267	0.987127					84.1183	0.987127
7.18492	0.774845		12.0318	0.972317					55.3317	0.972317
3.16228	-8.22994		28.0236	0.982591					73.0746	0.982591
2.3326	-2.8222		15.8407	0.987529					83.9259	0.987529
6.34874	-0.0181119		16.3054	0.993903					79.5427	0.993903
5.70064	0.0953716		13.7168	0.965335					88.2055	0.965335
0.0245024	-0.0891789		22.0131	0.882368					89.2548	0.882368
0.00561487	-0.00846699		9.37445	0.982665					78.964	0.982665
2.49325	0.0498867		10.8593	0.659824					19.1666	0.659824
0.00739743	-0.0212082		2.18548	0.00243883					122.783	0.00243883
2.82982	0.00584563		14.4438	0.998871					84.6606	0.998871
0.314563	-0.0431412		13.4673	0.936161					85.4633	0.936161
0.295345	-0.0293749		9.93681	0.988327					94.6424	0.988327
6.45765	0.692362		0.00435192	-0.013225					48.2017	-0.013225
7.36247	0.804314		29.5868	0.996403					95.7593	0.996403
1.11326	-0.0115321		14.9797	0.984501					55.0879	0.984501
0.00612086	-0.00128181		4.24865	0.378825					127.784	0.378825
3.7732	-0.444494		15.0131	0.998889					112.946	0.998889
1.80977	-0.00490914		14.1615	0.965858					9.31711	0.965858
10.2907	0.860444		7.18988	0.934614					97.5307	0.934614
10.355	0.85929		7.18098	0.939103					66.0464	0.939103
28.1542	0.959361		12.1321	0.969513					96.452	0.969513
5.15003	0.297877		14.6107	0.853084					122.419	0.853084
12.4665	0.76715		13.6729	0.987725					75.4926	0.987725
0.000150666	-0.0123474		13.9658	0.756437					77.9028	0.756437
14.407	0.693679		29.1172	0.985738					80.5862	0.985738
4.28607	0.0148481		19.7093	0.964342					90.7684	0.964342
5.40915	0.150696		10.2049	0.983113					111.377	0.983113
4.2405	-0.429948		5.79381	0.272774					112.635	0.272774
6.73668	0.719554		24.3746	0.968555					94.1795	0.968555
0.00698372	-9.82226e-05		7.09799	0.973171					69.2615	0.973171
10.3881	0.833384		6.1899	0.257918					141.782	0.257918
2.52471	0.08546		16.7868	0.984295					115.32	0.984295
0.0109328	-0.0128944		9.46687	0.417819					157.28	0.417819
2.55662	-0.394541		16.4105	0.99652					42.2316	0.99652
0.00828396	-0.00102141		9.32649	0.563316					58.6477	0.563316
1.37595	-0.0208531		16.6354	0.892982					84.734	0.892982
2.47204	-1.31736		9.3769	0.799223					52.9451	0.799223
0.246205	-0.855832		5.29955	0.843924					93.3648	0.843924
2.45423	0.0578887		5.28716	0.67572					29.9924	0.67572
0.0069371	-0.0549613		2.35605	-0.824857					113.004	-0.824857
19.9743	0.75079		5.55086	0.398654					78.5901	0.398654
0.0665999	-0.567061		17.5658	0.9889					117.249	0.9889
8.10757	0.743359		14.5426	0.984823					132.4	0.984823
16.5438	0.986953		5.96667	0.380727					159.135	0.380727
8.61003	0.374794		13.9702	0.919305					116.068	0.919305
5.6961	0.883826		20.6237	0.987693					119.224	0.987693
5.42751	0.240591		4.05612	0.539839					44.277	0.539839
24.979	0.978528		10.462	0.933861					167.842	0.933861
2.37177	0.0926554		7.57783	0.672019					77.9303	0.672019
6.52934	0.248968		19.0703	0.958532					109.121	0.958532
14.7292	0.99413		12.3161	0.996889					130.715	0.996889
2.35115	-0.143519		2.07933	-0.354937					144.533	-0.354937
2.58179	-0.664889		28.14	0.992506					81.126	0.992506
3.88885	-0.410566		9.12475	0.59919					108.379	0.59919
3.35471	0.103422		11.5617	0.460653					106.142	0.460653
21.5695	0.937599		16.6443	0.998791					79.2845	0.998791
0.0107329	-0.00826478		5.55176	0.825101					57.4426	0.825101
4.63461	0.600475		24.8679	0.996286					92.1805	0.996286
0.21102	-1.2856		15.7197	0.997064					85.7769	0.997064
5.42816	0.323077		20.4753	0.974726					97.0007	0.974726
3.16228	-15.5786		12.038	0.834817					65.0938	0.834817
5.53143	0.905235		0.0956927	-0.124332					14.3146	-0.124332
3.16228	-4.01491		13.2741	0.993793					52.0687	0.993793
10.8453	0.0144589		9.23286	0.806972					120.039	0.806972
3.16228	-2.00634		29.2867	0.996719					108.857	0.996719
18.3686	0.891926		26.3744	0.996846					92.8153	0.996846
5.6517	0.0408695		23.4891	0.948051					64.8489	0.948051
3.05525	-0.182685		17.1233	0.976663					56.1494	0.976663
21.5283	-1.29078		15.6469	0.991683					11.9704	0.991683
11.4968	0.511399		11.2997	0.878787					104.109	0.878787
4.00535	0.611789		3.58516	0.765276					54.0722	0.765276
3.81323	-0.449266		3.16228	0.662691					46.6267	0.662691
7.74737	0.822615		4.89424	0.881995					71.9297	0.881995
6.7659	0.5394		30.5801	0.945747					56.9828	0.945747
0.000154578	-0.000909268		4.03348	0.138218					80.3168	0.138218
3.16228	-0.606187		8.76251	0.984185					110.717	0.984185
27.6396	0.907203		19.2952	0.9908					19.2876	0.9908
3.68806	-0.0376673		10.9571	0.937722					95.5227	0.937722
2.1722	0.00253407		12.613	0.934475					64.7465	0.934475
2.0831	-0.315066		19.4326	0.997397					142.183	0.997397
0.00188172	-1.99021e-05		1.69535	-0.137989					135.226	-0.137989
2.385	0.0247361		20.3322	0.988493					119.846	0.988493
7.8164	0.825991		0.0971453	-0.114705					16.861	-0.114705
0.323548	-0.688781		3.68825	0.698239					92.2058	0.698239
2.06458	-0.69245		12.2794	0.784					81.8869	0.784
2.75725	0.0153944		16.3443	0.974434					134.474	0.974434
4.658	-0.349895		7.16715	0.645484					89.2178	0.645484
2.49637	-0.715284		5.61882	0.353716					7.04468	0.353716
19.9272	0.911357		11.7022	0.994359					137.86	0.994359
3.77737	-0.637159		5.66867	0.820308					116.004	0.820308
2.26853	-6.45692		23.2261	0.958638					87.7354	0.958638
0.246913	-0.75353		5.26467	0.74682					51.7586	0.74682
0.830454	-0.0479501		3.16228	-0.82988					161.621	-0.82988
2.35237	-0.826157		3.71322	0.0377455					92.772	0.0377455
7.2895	0.562221		5.28953	0.680562					7.56177	0.680562
2.75766	0.611877		10.0465	0.564669					140.059	0.564669
9.72708	0.836905		0.375676	-0.73791					116.621	-0.73791
11.2675	0.797804		29.9804	0.964573					124.638	0.964573
3.03924	0.0524035		2.32208	-0.0906379					166.171	-0.0906379
11.9705	0.68396		25.1767	0.997485					98.4438	0.997485
28.336	0.995954		3.53976	0.315969					138.036	0.315969
2.5184	-2.50902		11.5651	0.976962					142.968	0.976962
5.77072	-1.8315		1.41317	-0.0412864					127.154	-0.0412864
9.42099	0.581369		9.911	0.987859					81.2345	0.987859
16.4346	0.867837		20.8837	0.993666					77.4882	0.993666
2.06334	-0.566265		8.45833	0.942848					47.8471	0.942848
0.0773343	-0.570794		3.16228	-13.7509					NaN	-13.7509
0.444253	-0.00440895		10.6582	0.979608					154.294	0.979608
1.51093	-0.017966		11.5316	0.92697					66.715	0.92697
0.132624	-0.650183		27.7455	0.994717					85.8235	0.994717
5.50582	0.666054		13.3863	0.996349					137.443	0.996349
5.70637	0.0421244		25.5828	0.99667					138.517	0.99667
5.76541	0.839385		21.1816	0.617021					140.188	0.617021
3.16228	-25.9093		20.4826	0.987637					101.823	0.987637
10.5211	0.991209		21.4913	0.98618					67.1893	0.98618
13.0782	0.850053		27.923	0.996628					79.4605	0.996628
2.67123	0.00156551		11.1598	0.989724					65.2805	0.989724
3.26656	-0.236451		7.74307	0.912747					104.359	0.912747
5.6034	0.835473		16.9477	0.922174					67.4438	0.922174
14.8916	0.41698		16.9473	0.989399					49.6693	0.989399
6.54093	0.269714		11.4135	0.821662					135.952	0.821662
3.40093	-0.253018		8.20616	0.981381					122.747	0.981381
5.35166	-0.78174		25.0501	0.998536					89.6827	0.998536
2.67996	-0.00179255		11.6298	0.947661					90.017	0.947661
0.418858	-0.0067325		17.5518	0.988384					80.1385	0.988384
3.16228	0.470477		2.48246	-0.659765					22.7934	-0.659765
11.3521	0.210278		6.66938	0.458044					139.732	0.458044
20.6909	0.84047		12.2023	0.958997					89.0367	0.958997
12.8067	0.945631		15.4194	0.979664					157.014	0.979664
11.5453	0.774143		4.70057	0.596463					98.0305	0.596463
19.7879	0.169083		29.695	0.991733					90.0546	0.991733
8.34088	0.51984		33.5314	0.97739					83.9784	0.97739
3.31793	0.339294		21.1706	0.999228					123.314	0.999228
3.16228	-0.219855		10.5258	0.952339					72.9791	0.952339
0.767818	-0.0252381		4.97068	0.696835					65.1992	0.696835
2.47281	-0.589937		2.84555	0.609284					93.2531	0.609284
8.76166	0.535577		0.270036	-0.524547					83.6342	-0.524547
3.16228	-0.792612		18.7651	0.99692					109.878	0.99692
3.16228	-1.81152		0.158114	-0.264382					142.38	-0.264382
3.16228	-0.145086		14.3651	0.845169					97.0494	0.845169
3.16228	-1.33414		8.04779	0.746613					89.0367	0.746613
0.00568354	-0.0173819		7.3434	0.616528					89.3714	0.616528
0.00501796	-0.00315336		16.2765	0.948073					106.893	0.948073
3.16228	-1.51579		23.5878	0.852334					76.3255	0.852334
0.0195964	-0.060525		8.21317	0.839728					75.6364	0.839728
1.87942	-0.0344779		17.0532	0.983297					141.812	0.983297
11.551	0.736979		11.8203	0.987824					69.1947	0.987824
5.78116	0.66734		8.03048	0.36914					115.434	0.36914
8.09204	0.981357		24.0751	0.994349					104.471	0.994349
3.16228	-1.80941		13.0235	0.951078					66.7018	0.951078
5.91082	-1.16193		12.2238	0.982954					142.438	0.982954
17.566	0.927636		11.4557	0.988229					154.495	0.988229
3.16228	-0.600577		5.08005	0.584427					130.186	0.584427
0.0116717	-0.000752331		17.1911	0.993938					100.105	0.993938
0.0916581	-0.378942		15.9644	0.974603					86.7607	0.974603
10.0247	0.594605		8.7551	0.75882					32.14	0.75882
2.17789	0.0147351		4.81435	0.649309					106.249	0.649309
0.252294	-0.694115		2.25767	-0.47659					154.029	-0.47659
6.07214	0.742055		14.3048	0.979785					55.4224	0.979785
24.2602	0.830884		7.26171	0.947417					104.235	0.947417
10.3829	0.718721		6.52352	0.75558					101.353	0.75558
6.67484	0.713353		12.7202	0.920041					121.47	0.920041
5.28956	0.0726111		8.26903	0.949946					128.47	0.949946
0.0207222	-0.123645		5.6738	-0.575704					20.4963	-0.575704
3.16228	-2.48646		6.676	0.728817					143.807	0.728817
2.65026	-0.517683		0.00481524	-0.00849557					12.1466	-0.00849557
0.0053034	-0.000635949		25.9816	0.896576					115.745	0.896576
3.16228	-0.59267		6.66465	0.188477					83.5518	0.188477
13.7966	0.762051		3.22799	0.166388					33.4731	0.166388
0.378723	-0.301085		5.44845	0.957848					120.93	0.957848
10.0653	-0.569397		3.16228	-4.46281					151.249	-4.46281
3.12166	0.297916		12.4268	0.576269					70.6675	0.576269
6.74857	-0.898623		5.81268	0.919088					17.7104	0.919088
0.0614316	-0.285086		27.7725	0.995058					49.7726	0.995058
0.000156597	-0.00180349		5.09608	0.567229					173.068	0.567229
2.28172	-4.56339		9.44375	0.940976					26.4465	0.940976
7.78672	0.772594		2.13705	0.0784014					130.094	0.0784014
0.967347	-0.00477029		38.4578	0.996163					89.1081	0.996163
13.0635	0.0768708		18.2887	0.977653					97.5702	0.977653
23.298	0.687106		1.35944	-0.00265534					172.647	-0.00265534
17.2961	0.958721		14.1554	0.9876					93.9988	0.9876
3.84245	0.16632		18.6168	0.966934					91.4393	0.966934
4.23561	0.326804		10.0798	0.636913					107.371	0.636913
26.1161	0.843711		2.34436	-1.71064					97.5941	-1.71064
11.604	0.818204		9.29936	0.872871					73.8226	0.872871
4.86977	-0.785638		16.26	0.922246					108.683	0.922246
1.7283	0.0180246		10.7793	0.973436					106.796	0.973436
6.00491	0.808381		7.80379	0.990519					58.1556	0.990519
0.111745	-0.739769		8.9585	0.964498					107.121	0.964498
5.16907	-1.17197		0.195048	-0.185164					128.271	-0.185164
0.129055	-0.560487		10.29	0.886196					61.5925	0.886196
5.37697	-0.000338448		26.3625	0.896694					104.557	0.896694
13.8968	-1.02798		0.417563	-0.0730391					145.99	-0.0730391
4.06507	-0.331447		8.12288	0.995629					79.729	0.995629
6.78545	0.686461		22.786	0.996271					150.828	0.996271
13.7729	0.945914		8.45833	0.942848					91.9974	0.942848
5.5591	-0.349132		20.0315	0.995896					81.1018	0.995896
2.03218	0.103291		5.45994	0.98967					109.965	0.98967
2.6698	-0.0581344		31.8033	0.96208					95.465	0.96208
0.000160441	-0.00449363		4.97211	0.840599					69.321	0.840599
4.29585	-0.793344		12.9302	0.993747					147.667	0.993747
3.16228	-1.67304		18.3566	0.985747					107.485	0.985747
7.39157	0.280748		17.8948	0.753889					140.45	0.753889
3.13911	0.108153		21.0686	0.997848					94.3889	0.997848
5.02757	-0.15293		12.5462	0.911179					104.888	0.911179
0.0969255	-0.24255		11.2296	0.867027					115.054	0.867027
0.00917397	-0.00107264		4.94508	0.602357					83.5605	0.602357
9.83237	0.789015		4.17162	0.542274					124.693	0.542274
4.06086	0.362406		0.514085	-0.00263881					154.711	-0.00263881
0.00977896	-0.000213442		2.57809	0.265048					90.5217	0.265048
0.00612387	-0.00465226		24.3583	0.996286					98.3977	0.996286
2.44205	-1.79717		9.67254	0.915574					46.6496	0.915574
3.54338	0.789188		25.8757	0.966782					167.264	0.966782
12.2433	0.709398		3.16228	0.505545					91.5514	0.505545
5.97256	0.805292		3.45707	0.61452					79.1313	0.61452
3.16228	-1.95919		13.1887	0.969514					95.4541	0.969514
13.4815	0.775764		0.212213	-0.100517					0.785751	-0.100517
0.236695	-0.00871039		3.16228	-0.771932					135.786	-0.771932
1.31638	-0.178285		25.1891	0.991881					78.6582	0.991881
3.16228	0.492764		9.89715	0.57089					39.3511	0.57089
0.00252529	-0.0260989		15.0089	0.974728					125.22	0.974728
0.0676822	-0.111981		2.82069	0.127362					138.405	0.127362
4.31721	-0.870865		0.00151688	-0.000115285					155.155	-0.000115285
4.43605	0.323687		9.76955	0.57509					101.945	0.57509
4.75037	0.854439		6.26605	0.938833					33.3876	0.938833
0.00788794	-0.0077649		30.1128	0.998747					85.6815	0.998747
0.00232977	-0.0141685		4.95186	0.877763					70.0048	0.877763
3.16228	-5.7759		14.0551	0.995964					82.4152	0.995964
5.76943	0.101251		2.25992	-10.6954					NaN	-10.6954
16.8201	0.522417		26.1164	0.999066					92.2863	0.999066
0.124491	-0.47478		19.921	0.978785					100.065	0.978785
7.72569	0.802254		24.6258	0.973378					93.3149	0.973378
16.6755	0.728454		10.6683	0.73467					160.87	0.73467
6.76327	0.392185		21.5106	0.991163					97.0247	0.991163
1.8023	-0.11652		15.1565	0.988375					107.722	0.988375
2.47742	-0.921427		37.3914	0.856634					136.423	0.856634
0.000169779	-0.00416728		7.72683	0.3233					85.6181	0.3233
2.49585	-1.94822		16.6338	0.946456					79.2077	0.946456
28.1543	0.988144		7.98069	0.861363					139.069	0.861363
3.16228	-2.4675		21.9342	0.989999					90.4525	0.989999
0.503623	-0.000732043		12.9631	0.992593					87.6837	0.992593
3.37878	0.0680622		8.10727	0.958101					57.7762	0.958101
6.67663	0.756394		19.7052	0.99445					92.1157	0.99445
20.7848	0.846296		29.4142	0.989395					84.9893	0.989395
9.13817	0.895564		6.69833	0.780774					133.945	0.780774
5.14949	-0.445666		14.6934	0.97051					104.555	0.97051
0.14874	-0.26222		11.9515	0.962728					93.2036	0.962728
7.51735	0.124002		5.27263	0.956943					74.4655	0.956943
5.39148	-1.14306		9.03964	0.754132					104.555	0.754132
5.15971	0.336465		9.19284	0.817474					64.9927	0.817474
3.16228	0.55526		6.46867	-0.278198					11.5004	-0.278198
3.33079	0.219903		21.7155	0.899847					104.212	0.899847
5.36844	0.793214		21.9733	0.929751					65.7173	0.929751
0.205012	-0.192344		14.0956	0.962499					130.253	0.962499
16.9031	0.969729		10.8447	0.949856					116.238	0.949856
7.44497	0.938125		18.2525	0.948655					90.5876	0.948655
3.16228	0.0517776		0.347639	-0.392762					82.5934	-0.392762
16.7632	0.88971		20.0592	0.995442					101.505	0.995442
8.00401	0.809638		12.0681	0.954838					106.528	0.954838
2.96693	0.00724902		7.43041	0.915213					80.4989	0.915213
0.0120542	-0.000137516		3.21757	0.252109					62.38	0.252109
3.20749	0.0430414		9.30773	0.973636					161.947	0.973636
24.5886	0.364377		10.2496	0.640187					99.3879	0.640187
0.00497761	-0.0166514		22.4299	0.990884					96.3197	0.990884
8.67772	0.798586		11.9666	0.913168					82.2136	0.913168
0.519037	-0.00146241		3.16228	-154.015					50.2868	-154.015
8.12557	0.0614543		7.72455	0.992774					68.0529	0.992774
3.64718	0.135871		16.8381	0.970602					97.0431	0.970602
5.06339	-0.00778656		7.43232	0.965182					38.5834	0.965182
1.45093	-0.0433535		6.47915	0.837855					114.449	0.837855
12.8976	0.540507		12.7176	0.672008					88.313	0.672008
12.3414	0.749023		3.16228	0.648726					95.9637	0.648726
8.06789	0.18648		5.39446	0.971556					77.2001	0.971556
10.1284	0.955849		4.71149	0.687513					33.8451	0.687513
19.1931	0.926289		3.16228	0.387925					159.058	0.387925
1.22579	0.00068701		20.622	0.992327					72.5258	0.992327
2.8219	-0.188086		17.7969	0.98108					102.271	0.98108
1.61199	-0.078407		8.94832	0.981706					34.5707	0.981706
0.00708883	-0.0175037		16.5604	0.835593					43.7679	0.835593
0.670215	-0.0587033		4.48846	0.457697					141.174	0.457697
3.5163	-0.244911		1.69964	-0.147151					137.881	-0.147151
5.51801	-0.32881		19.0968	0.960046					84.7002	0.960046
[truncated: 392 more rows]

## Sheet: SI 7
		DIA			Fluorescence
Panels A-B		# of PBP2 molecules	# of bound PBP2molecules	# of active PBP2 molecules	# of PBP2 molecules	# of bound PBP2molecules	# of active PBP2 molecules
	TKL130	435	95.7529	40.4173	435	95.7529	40.4173
	TKL130/pKC128	2496.1	306.509	146.654	1261.5	154.903	74.1159
		DIA			Western Blot
		# of PBP2 molecules	# of bound PBP2molecules	# of active PBP2 molecules	# of PBP2 molecules	# of bound PBP2molecules	# of active PBP2 molecules
	AV127	ND	ND	ND	55.4916	20.2444	15.3911
	TU230(attLHC943) with 5uM IPTG	246	17.1052	13.6214	246	17.1052	13.6214
	TU230(attLHC943) with 15uM IPTG	ND	ND	ND	353.175	15.6221	12.4006
	TU230(attLHC943) with 25uM IPTG	1037.97	44.3214	36.8754	1171.94	50.042	41.635
Panel C		TKL130	TKL130/pKC128
	Number of tracks per area [1/um2]	0.0879507	0.0793675
		0.0275722	0.0214525
		0.040179	0.137366
		0.0530159	0.122549
		0.018104	0.0910031
		0.0536616	0.134555
		0.0574032	0.130393
		0.0226555	0.0692033
		0.0981327	0.0320828
		0.0495585	0.118715
		0.0142271	0.13508
		0.0582898	0.0239094
		0.0357561	0.0235325
		0.00618202	0.12031
		0.0936929	0.118683
		0.0319908	0.0502387
		0.0281278	0.0129874
		0.0639848	0.128146
		0.0484885	0.0913249
		0.0194246	0.0300853
		0.060256	0.0162704
		0.0338916	0.136859
		0.0153098	0.116905
		0.0577959	0.0636431
		0.0896259	0.118623
		0.0386205	0.1184
		0.0309906	0.0515891
		0.0531581	0.119407
		0.0713882	0.124114
		0.0186397	0.0794196
			0.122507
			0.123001
			0.0743131
			0.140607
			0.0472671

## Sheet: SI 8
						Doubling times
Panel A	Condition	Width [um]	Length [um]		Condition	Replicate 1	Replicate 2	Replicate 3
	AV127	0.9366	3.6569		MG1655	70.1695	68.2619	73.8616
	AV127	0.9309	3.7587		WT +5uM IPTG	70.1975	72.1124	70.5538
	AV127	0.9249	3.3671		WT +25uM IPTG	75.5791	76.5343	75.0563
	WT +5uM IPTG	0.973533	3.03651		AV127	75.6961	72.6546	75.8105
	WT +5uM IPTG	0.997132	2.95992
	WT +5uM IPTG	0.984767	3.11567
	WT +15uM IPTG	0.9369	3.3872
	WT +15uM IPTG	0.9193	3.6288
	WT +15uM IPTG	0.9282	3.3182
	WT +25uM IPTG	0.93849	3.06357
	WT +25uM IPTG	0.953569	3.07501
	WT +25uM IPTG	0.961886	3.10602
	WT +25uM IPTG	0.964481	3.18839
	WT +25uM IPTG	0.973469	3.05394
	WT +5uM IPTG (10h)	1.0215	2.933
	WT +5uM IPTG (10h)	1.0407	2.9126
	WT +5uM IPTG (10h)	1.0261	2.883
	WT +25uM IPTG (10h)	0.9448	2.9733
	WT +25uM IPTG (10h)	0.9793	3.0746
	WT +25uM IPTG (10h)	0.9403	2.9536
	Mut +5uM IPTG	0.922651	3.23753
	Mut +5uM IPTG	0.91887	3.1324
	Mut +25uM IPTG	0.895497	3.17533
	Mut +25uM IPTG	0.907673	3.10976
	MG1655	0.909458	3.14072
	MG1655	0.889996	3.24285
Panel B		Mass Spec (DIA)	Mass Spec (PRM)
	Condition	PBP2 fold change*	PBP2 levels**
	MG1655	1.1738	213
	MG1655	1.0633	-
	MG1655	1.3791	-
	WT +5uM IPTG	0.8899	238
	WT +5uM IPTG	1.1068	252
	WT +5uM IPTG	1.0033	247
	WT +25uM IPTG	3.794	1033
	WT +25uM IPTG	4.4169	1297
	WT +25uM IPTG	4.4399	1289
* PBP2 normalized with respect to PBP2 levels in WT+5uM IPTG
** Absolute number of PBP2 molecules per cell					Western Blot
		Fluorescence			PBP2 fold change*
	Condition	PBP2 fold change*		Condition	Replicate 1	Replicate 2	Replicate 3
	WT +5uM IPTG	1.0844		AV127	0.16418	0.182896	0.32965
	WT +5uM IPTG	0.9087		WT +5uM IPTG	0.856208	0.954856	1.18894
	WT +5uM IPTG	1.0069		WT +15uM IPTG	1.57768	1.30347	1.42585
	WT +25uM IPTG	1.5675		WT +25uM IPTG	4.68035	3.42862	6.18304
	WT +25uM IPTG	2.8235
	WT +25uM IPTG	2.8432		* Fold change with respect to WT +5uM IPTG
	WT +25uM IPTG	2.8108
	WT +25uM IPTG	2.7489
	Mut +5uM IPTG	0.6234
	Mut +5uM IPTG	1.651
	Mut +25uM IPTG	2.2799
	Mut +25uM IPTG	2.5948
	MG1655	-0.1564
	MG1655	0.1564
* Fold change with respect to WT +5uM IPTG
Panel C
	Fast tracking	Number of tracks	Diffusion constant [um2/s]	Bound fraction [%]	p-value Bound Fraction*
	AV127	2369	0.023174	36.54
	AV127	1232	0.02621	43.764
	AV127	1218	0.023049	38.446
	AV127	437	0.024769	31.214
	AV127	444	0.023343	32.454	4.05729e-05
	WT +5uM IPTG	6005	0.02065	6.7264
	WT +5uM IPTG	6500	0.019368	8.5647
	WT +5uM IPTG	4699	0.020578	5.5677	0.000210613
	WT +15uM IPTG	13694	0.020492	6.0471
	WT +15uM IPTG	11318	0.019553	3.7219
	WT +15uM IPTG	14892	0.019334	3.4999	0.0651396
	WT +25uM IPTG	7041	0.010929	3.5781
	WT +25uM IPTG	12866	0.011812	3.7461
	WT +25uM IPTG	10944	0.011783	5.4821
	Mut +5uM IPTG	4966	0.02346	14.722
	Mut +5uM IPTG	1816	0.025226	20.744
	Mut +5uM IPTG	2959	0.022937	14.899	0.00377038
	Mut +25uM IPTG	5892	0.020151	8.9782
	Mut +25uM IPTG	6800	0.014862	3.9742
	Mut +25uM IPTG	4266	0.018998	8.7878	0.163403
* p-value calculated according to two-lobed t-test with respect to WT +25uM IPTG

## Sheet: SI 9
	Condition	Width [um]	Length [um]	Average Fluorescence		Condition	Number of tracks	Avg diffusion constant [um2/s]	Bound fraction [%]	p-value Bound Fraction*
	WT +5uM IPTG -6h-	0.957784	2.90713	21.8356		WT +5uM IPTG -6h-	6005	0.02065	6.7264
	WT +5uM IPTG -6h-	0.969216	2.96178	19.9589		WT +5uM IPTG -6h-	6500	0.019368	8.5647
	WT +5uM IPTG -6h-	0.938842	2.89555	15.9876		WT +5uM IPTG -6h-	4699	0.020578	5.5677
	WT +5uM IPTG -8h-	0.988856	2.92848	19.3768		WT +5uM IPTG -10h-	3188	0.016816	13.564
	WT +5uM IPTG -8h-	0.97924	2.84411	19.2408		WT +5uM IPTG -10h-	2473	0.016513	13.944
	WT +5uM IPTG -8h-	0.962933	2.82252	19.3728		WT +5uM IPTG -10h-	2830	0.019446	11.222	0.00117271
	WT +5uM IPTG -10h-	1.02147	2.93296	16.4796		WT +25uM IPTG -6h-	7041	0.010929	3.5781
	WT +5uM IPTG -10h-	1.04071	2.91256	18.4335		WT +25uM IPTG -6h-	12866	0.011812	3.7461
	WT +5uM IPTG -10h-	1.02607	2.88297	18.1335		WT +25uM IPTG -6h-	10944	0.011783	5.4821
	WT +5uM IPTG -10h-	-	-	-
						* p-value calculated according to two-lobed t-test with respect to WT +25uM IPTG
	WT +25uM IPTG -6h-	0.952139	2.89669	45.4348
	WT +25uM IPTG -6h-	0.98081	3.00159	43.9362
	WT +25uM IPTG -6h-	0.938156	2.89403	47.2511
	WT +25uM IPTG -8h-	0.958979	2.90497	41.9392
	WT +25uM IPTG -8h-	0.975229	2.95001	52.4924
	WT +25uM IPTG -8h-	0.996991	3.1152	45.2842
	WT +25uM IPTG -10h-	0.944772	2.97335	51.6409
	WT +25uM IPTG -10h-	0.979315	3.07464	60.1699
	WT +25uM IPTG -10h-	0.940274	2.95364	-

## Sheet: SI 10
Panel A						Panel B
	Condition	Number of tracks	Persistent fraction [%]	p-value persistent fraction*		Condition:	AV127		WT +5uM IPTG		WT +15uM IPTG		WT +25uM IPTG		Mut +5uM IPTG		Mut +25uM IPTG
	AV127	865	71.768				Velocity [nm/s]	R^2	Velocity [nm/s]	R^2	Velocity [nm/s]	R^2	Velocity [nm/s]	R^2	Velocity [nm/s]	R^2	Velocity [nm/s]	R^2
	AV127	1290	79.26				0.501996	-0.306303	3.20253	0.880058	2.57569	0.466253	11.9739	0.96265	7.85119	0.942324	5.37529	0.840974
	AV127	1006	77.051	0.22098			2.1314	0.422186	5.62687	0.764831	15.2458	0.997871	0.00484	-0.0121203	4.52783	0.435389	9.58228	0.974803
	WT +5uM IPTG	143	69.0355				0.00470828	-0.0129496	20.6533	0.964312	14.5278	0.988308	4.27712	0.925022	9.10549	0.927475	6.5317	0.988812
	WT +5uM IPTG	551	89.6317				14.2732	0.996146	16.5957	0.990627	11.8755	0.733674	23.1001	0.965537	11.8537	0.968797	12.2056	0.982734
	WT +5uM IPTG	65	80.2817	0.657073			6.87314	0.852595	5.93522	0.781056	14.5642	0.966663	14.9373	0.972709	5.66288	0.273778	4.35646	-1.08292
	WT +15uM IPTG	1076	67.433				10.5735	0.99004	6.45772	0.962652	16.0614	0.983448	11.8854	0.998668	9.04596	0.969551	15.1893	0.986029
	WT +15uM IPTG	636	85.231				9.68121	0.849005	9.03011	0.993103	18.7411	0.96367	15.5009	0.86237	8.79719	0.924135	6.71123	0.8556
	WT +15uM IPTG	494	85.472	0.634179			7.40014	0.99455	16.6236	0.998107	19.8797	0.799162	16.8758	0.972651	9.88547	0.926386	2.59479	0.734531
	WT +25uM IPTG	156	85.1351				10.0152	0.98631	16.9273	-2.39619	18.9506	0.884799	18.2875	0.942088	12.406	0.813418	9.38127	0.916297
	WT +25uM IPTG	131	89.7163				6.77267	0.623441	0.725734	-0.0356044	23.0501	0.925184	22.4072	0.848933	0.00312383	-0.0606358	5.68637	0.981294
	WT +25uM IPTG	265	74.7541				12.6614	0.999533	21.3582	0.744442	19.9692	0.953365	1.21248	-2.58648	11.0859	0.989921	6.60028	0.772296
	Mut +5uM IPTG	1208	62.5231				16.747	0.995245	2.29627	-1.32511	0.00328185	-0.313966	9.54669	0.981037	15.2546	0.984183	11.1609	0.827456
	Mut +5uM IPTG	401	66.2324				11.6207	0.953161	2.88763	0.280167	19.2527	0.922592	14.0936	0.853268	4.6998	0.867992	12.662	0.812851
	Mut +5uM IPTG	292	64.0288	0.0141687			24.6353	0.930417	8.81484	0.990292	13.2586	0.983151	19.2864	0.933341	9.12203	0.957934	10.092	0.901863
	Mut +25uM IPTG	182	52.2876				11.617	0.985456	7.47015	0.963532	9.58487	0.349053	5.85688	0.91053	18.5321	0.997442	3.16228	0.098005
	Mut +25uM IPTG	269	43.0075				9.2037	0.94787	1.11308	-0.546349	24.5863	0.940294	19.3525	0.951156	1.11606	-0.916428	5.86846	0.983362
	Mut +25uM IPTG	312	63.7908	0.0155773			6.54426	0.759119	11.7299	0.98988	23.326	0.905345	3.22154	-45.4438	1.31068	-0.553316	10.9808	0.996756
* p-value calculated according to two-lobed t-test with respect to WT +25uM IPTG							17.1212	0.978752	9.50394	0.916815	5.73881	-1.48991	12.8307	0.978373	14.0438	0.981945	3.92678	0.86742
							12.5492	0.916997	19.09	0.985702	19.3347	0.98875	16.6184	0.938154	3.78381	0.761522	8.60147	0.960761
							12.7491	0.99292	13.538	0.74073	18.8287	0.881569	17.6318	0.958911	13.2463	0.714217	9.68154	0.993936
							6.68049	0.980675	10.1716	0.993612	3.85307	0.929547	16.9515	0.978404	9.5445	0.927622	13.2123	0.942297
							1.22314	0.291698	2.6377	0.382306	21.0781	0.975794	12.3207	0.978212	12.5258	0.779884	3.66608	0.47442
							12.0008	0.99634	15.8341	0.994274	10.621	0.645014	2.33268	-16.0241	11.8336	0.995474	1.85606	0.0985726
							0.000149392	-0.00371669	5.55486	0.733211	5.88814	0.77562	15.1557	0.988886	14.3255	0.980895	7.2769	0.990017
							14.1976	0.980601	11.8796	0.990298	19.2868	0.916691	9.11136	0.909952	11.23	0.967645	0.000151112	-0.0207434
							7.41626	0.980563	9.17953	0.962356	17.0036	0.658293	14.7083	0.99684	11.0744	0.979745	8.35004	0.997676
							3.18027	0.516491	7.62032	0.949448	13.2002	0.910989	14.5158	0.995865	6.53555	0.99149	3.16228	-10.7936
							17.0807	0.997674	13.0873	0.983435	6.5662	0.618137	15.5974	0.998946	6.92699	0.970838	16.4656	0.994621
							15.9744	0.997264	13.6361	0.999208	17.0364	0.973717	17.331	0.989281	3.4226	0.943131	10.8502	0.995284
							8.32024	0.424358	13.2284	0.957845	19.7545	0.936372	21.2944	0.982232	8.06001	0.539689	6.95688	0.910282
							3.247	0.679595	9.55431	0.98963	16.822	0.874238	12.0781	0.978762	11.4787	0.751499	2.37956	-2.40615
							12.8747	0.995173	15.5107	0.994891	21.6728	0.941034	14.1425	0.996704	1.85969	-0.232321	8.66481	0.994814
							11.6919	0.176874	12.5652	0.915759	14.3284	-34.8175	14.7041	0.994118	13.4647	0.990521	8.00791	0.991209
							12.9017	0.980591	14.6538	0.995288	12.1547	0.925028	13.6097	0.974643	12.1584	0.996822	7.00159	0.914817
							12.8305	0.981095	11.7153	0.999618	6.99551	0.665126	19.5349	0.976293	10.6396	0.959	5.9606	0.970599
							1.57909	0.0702553	11.3924	0.990056	19.8599	0.945862	11.7896	0.995976	6.30648	0.933009	6.85046	0.990334
							7.16804	0.053824	14.4719	0.985928	5.85634	0.717616	19.2788	0.998251	8.2695	0.98976	2.45852	0.192949
							13.8947	0.82971	11.7463	0.997178	6.68159	0.779732	16.4834	0.910638	0.00125308	-0.00995373	10.7148	0.983432
							6.93479	0.75651	5.2413	0.693404	10.4694	0.196143	16.4524	0.977881	12.3072	0.778562	13.221	0.983359
							3.46464	-2.2341	10.2887	0.987388	14.398	0.993832	16.1279	0.980138	10.3874	0.939557	3.85135	0.743177
							0.00169876	-0.0769307	18.0266	0.986735	7.1577	0.939714	0.930623	-2.87022	0.715956	-0.0261755	10.6098	0.953469
							0.00347723	-0.0146292	9.0627	0.997065	5.75273	0.844211	13.5962	0.988563	12.5515	0.994872	9.72251	0.328109
							2.24953	-2.13512	7.18989	0.432072	13.1202	0.912241	14.7515	0.964579	9.36313	0.984973	0.00105733	-0.122024
							18.6562	0.975011	13.0382	0.986335	7.48774	0.99548	13.9654	0.990287	6.13756	0.797842	11.0777	0.958213
							2.30612	-2.58999	13.2131	0.998893	18.1806	0.934185	14.773	0.985907	0.00264895	-0.00198492	6.32822	0.989462
							18.4229	0.9932	12.0255	0.955885	2.66988	0.302924	17.4757	0.99543	10.3604	0.998509	7.0438	0.973767
							11.6295	0.993148	3.16228	0.741217	14.4519	0.49685	17.6242	0.986069	0.00252652	-0.0545184	5.21321	0.179578
							12.2406	0.882109	8.50077	0.939117	11.0149	0.861968	13.3101	0.996089	0.006516	-0.00353022	0.00014905	-0.000615874
							12.8812	0.991481	16.7017	0.993576	10.7291	0.375844	12.8367	0.988567	12.644	0.841712	8.7873	0.999002
							8.8738	0.959916	8.77797	0.57983	14.0623	0.99317	15.1293	0.98124	7.53368	0.99958	6.13811	0.961388
							0.287694	-0.0204768	10.1035	0.983412	13.4098	0.898038	21.4548	0.862565	0.000149207	-0.00293084	7.73025	0.976507
							13.4003	0.948807	17.3549	0.997595	9.34666	0.997007	9.4909	0.960075	9.36496	0.922077	8.21659	0.936057
							19.4898	0.962629	4.29409	0.748572	4.3077	0.714708	8.9972	0.935887	10.792	0.979974	9.45135	0.591037
							17.183	0.996169	6.88792	0.953709	17.06	0.976607	12.8532	0.987109	5.88149	0.564901	8.14769	0.922135
							10.3416	0.953303	9.53434	0.74955	1.36046	-1.96438	1.3138	-3.91023	4.83776	0.0660671	15.3982	0.965164
							18.3203	0.985415	11.9409	0.9968	18.4293	0.97122	14.225	0.977728	8.64246	0.998134	6.1388	0.884934
							7.83389	0.959088	7.21266	0.655722	1.81301	-3.28014	16.4709	0.991812	16.1476	0.990736	12.1842	0.948558
							11.7548	0.961824	3.70426	0.999946	6.38433	-4.81427	16.653	0.9966	10.1244	0.987883	11.2214	0.997795
							4.83594	-0.0304762	0.884861	-0.986266	3.93973	0.979767	14.0647	0.990462	5.18532	-0.499075	5.90589	0.319367
							10.3309	0.946004	8.57407	0.976773	10.9331	0.896809	17.4657	0.898289	6.05723	-2.02518	5.89173	0.880331
							10.4783	0.980497	13.6951	0.996887	18.9626	0.840384	14.6715	0.918275	10.324	0.994663	10.9931	0.997758
							12.3301	0.993774	8.30721	0.978674	8.80745	0.862722	2.44035	-3.87404	0.878581	-0.0997555	9.94013	0.998203
							16.7856	0.977496	14.2759	0.956894	14.5235	0.981468	14.6623	0.998052	12.3057	0.970372	13.1415	0.998282
							12.573	0.863574	19.8017	0.949432	6.15011	0.144604	14.5991	0.997615	5.97795	0.651212	11.3654	0.975469
							9.20658	0.924244	14.952	0.910869	12.8632	-9.98332	13.2182	0.704276	11.0429	0.938178	12.1488	0.984858
							8.83882	0.998848	3.47888	0.648957	7.68806	0.955861	17.1024	0.99056	5.87544	0.988638	12.938	0.993201
							15.7141	0.985804	2.20328	-0.0327881	6.45261	0.678271	13.1061	0.993762	16.9668	0.998001	11.7718	0.987645
							18.3995	0.892785	13.4918	0.9908	3.16228	-2.79576	15.3354	0.965893	11.4427	-2.49054	10.3296	0.996981
							2.40028	-1.34593	10.2202	0.986201	11.3529	0.979305	15.0589	0.992291	10.3689	0.950782	11.8902	0.982665
							22.8031	0.969777	6.73901	0.956099	0.0035401	-0.0265168	19.0231	0.98128	16.6966	0.980762	7.98313	0.990287
							16.4841	0.985079	8.02749	0.983482	2.30703	-0.677179	12.2046	0.997989	2.13232	0.898801	5.06302	0.87778
							13.3714	0.977952	7.17235	0.919612	6.80387	-3.5246	17.8945	0.996808	8.26432	0.991691	14.8737	0.984567
							11.7942	0.999756	28.4658	0.968	17.6271	0.989269	9.29731	0.99551	10.2133	0.992617	13.5632	0.861758
							13.0667	0.996888	2.33455	-34.9181	5.59161	0.591043	11.9306	0.774835	10.9431	0.987406	8.49443	0.9995
							17.3564	0.944825	14.0359	0.99648	7.44444	0.655522	12.7817	0.995069	8.00113	0.987346	8.94642	0.421653
							10.4999	0.896995	4.57404	0.8868	10.135	0.958566	13.6343	0.913101	5.20955	0.99667	6.16737	0.93973
							12.899	0.940677	10.9944	0.990159	12.2182	0.62801	15.9158	0.964369	3.87274	0.938303	14.3084	0.989557
							11.8347	0.811998	8.75045	0.983378	13.8467	-5.59026	14.8953	0.86809	9.58352	0.869184	10.5289	0.230924
							17.8384	0.974731	12.0078	0.996636	13.1633	0.611669	10.7614	0.934226	10.1885	0.904966	10.8712	0.998509
							9.02621	0.869925	19.659	0.980621	11.6789	0.878283	13.7607	0.98867	3.03687	0.381182	13.909	0.993765
							17.3066	0.990622	14.4175	0.984261	10.7216	0.972978	10.3378	-0.633787	6.08518	0.94274	2.4127	-1.98376
							18.7316	0.965181	10.6934	0.940035	15.7051	0.890317	15.4855	0.992564	16.5769	0.995506	12.2377	0.987293
							15.2546	0.952837	11.139	0.989851	27.9926	0.929541	12.5624	0.999842	19.7222	0.825918	6.12772	0.270052
							9.57885	0.994416	10.4129	0.492665	17.9202	0.877264	16.9904	0.995609	3.95602	0.795339	7.28395	0.957959
							3.98593	0.946021	5.72639	0.925861	0.143366	-0.427726	20.2385	0.954421	9.57243	0.992535	3.74774	0.339041
							15.3642	0.999164	9.40568	0.983618	1.61121	0.879409	14.1183	0.940729	16.2092	0.99263	15.4687	0.937163
							15.0615	0.971518	16.1225	0.997298	4.83632	-1.95852	17.1257	0.742426	0.979639	-0.834281	1.05231	-0.272251
							3.82369	0.992226	11.8409	0.995408	24.3039	0.975498	12.8042	0.997321	1.89281	-1.30034	1.58258	-0.623339
							15.626	0.960061	13.1318	0.938249	14.2696	0.994013	13.4432	0.969326	16.8595	0.950267	10.5142	0.985643
							15.4103	0.998322	15.6713	0.998852	17.607	0.24098	6.14697	0.956344	21.2984	0.94536	0.035812	-0.223151
							19.6909	0.97421	12.3404	0.957943	21.7556	0.978869	14.9319	0.990579	13.558	0.993774	6.08159	0.99316
							9.18644	0.996166	7.22478	0.967093	16.844	0.98403	13.9506	0.998338	7.96441	0.653872	14.0481	0.987985
							20.6308	0.850242	10.5953	0.969549	15.7634	0.99582	8.25203	0.528691	12.4878	0.772726	11.8565	0.971567
							11.9838	0.697291	12.0372	0.998768	13.9646	0.913912	14.6446	0.958947	1.95683	-0.0864615	4.06359	0.943649
							14.7599	0.783959	15.7641	0.997443	17.9879	0.967426	14.0346	0.99532	10.1882	0.886811	8.68595	0.988892
							16.9726	0.96921	17.1709	0.99418	22.8494	0.988694	19.8148	0.98635	0.0011431	-0.00137491	4.23678	0.933267
							16.2712	0.966829	18.6874	0.982147	16.6425	0.989204	3.86424	0.768624	12.5632	0.519249	15.2056	0.996554
							17.661	0.91873	13.5895	0.982585	17.481	0.973798	13.5595	0.974062	6.69563	0.303719	11.3874	0.942803
							12.69	0.990289	13.3058	0.987246	19.0363	0.987212	5.44762	0.893876	10.8137	0.93541	0.00144719	-0.00335502
							4.81424	0.939761	11.0388	0.995189	16.2637	0.965186	4.29329	-1.04203	12.2492	0.997737	6.51133	0.976397
							14.1655	0.920473	9.95758	0.979431	27.4925	0.974002	5.19522	0.765291	1.86425	0.438233	9.66611	0.954734
							4.64659	0.166935	15.2476	0.986262	20.8191	0.979508	16.4735	0.949764	7.26217	0.597175	9.22669	0.99617
							12.5902	0.988296	2.40951	-0.799367	17.8778	0.953976	18.4415	0.994768	12.526	0.928695	8.84091	0.982302
							13.0106	0.98131	16.8154	0.852104	15.4785	0.983119	15.0124	0.97929	11.7273	0.858049	6.7559	0.684601
							21.702	0.91994	14.368	0.995254	11.8897	0.979972	9.08005	0.756087	14.5921	0.964944	4.83586	0.780146
							14.3158	0.974877	10.4402	0.987055	13.2923	0.972477	13.7793	0.990782	7.34774	0.864706	5.03805	-2.31373
							13.6063	0.926489	10.2381	0.972114	12.1097	0.941606	12.8361	0.941688	13.398	0.996677	10.7858	0.990907
							17.6096	0.918408	12.7985	0.995259	24.1613	0.830017	14.109	0.996658	10.1988	0.996337	13.4211	0.995603
							7.63949	0.945918	9.03604	0.957848	11.8128	0.997083	17.3373	0.913165	10.8312	0.986683	13.6318	0.151698
							3.16228	0.451963	0.000149465	-0.000236201	22.4031	0.97391	20.5916	0.994788	7.88826	0.936052	8.55104	0.92745
							8.60539	0.48792	0.819901	-0.0181474	19.0375	-4.87645	10.8889	0.974983	4.99166	0.990662	17.5877	0.995076
							14.34	0.990039	16.6649	0.989852	13.2256	0.898321	16.6722	0.970131	10.5216	0.989161	15.8277	0.950722
							15.6796	0.990312	12.2034	0.922087	9.55837	-0.534232	12.8224	0.996248	11.5201	0.698103	18.264	0.961079
							10.5971	0.985374	13.3986	0.985651	12.3152	0.98584	11.1445	0.809002	11.2885	0.995576	1.86827	0.0839686
							2.84038	0.791203	16.9274	-0.928955	18.6283	0.991713	13.2061	-0.435725	16.357	0.529377	0.00474426	-0.494505
							15.2839	0.883834	15.6254	0.980212	10.3653	-1.45584	6.92504	0.9596	2.28079	0.537359	11.2875	0.992463
							9.66368	0.939997	8.59909	0.983143	22.2247	0.987184	15.0814	0.867256	15.8447	0.997889	15.5979	0.998238
							14.884	0.930928	14.092	0.873621	22.0767	0.61975	13.9846	0.632139	8.92766	0.328948	5.35139	0.809057
							16.2781	0.915271	8.83139	0.995911	19.872	0.994436	14.5609	0.989195	7.53581	0.991972	12.4431	0.0602607
							9.81146	-19.5991	14.9801	0.829264	16.6958	0.994023	8.93964	0.935098	12.0099	0.986314	7.14759	0.72958
							16.7121	0.927259	8.47822	0.998956	27.3882	0.98626	18.0074	0.894443	7.18278	0.997247	6.87738	0.837933
							16.3759	0.827758	11.4505	0.974429	5.28721	0.991681	9.36145	0.975688	3.1081	-0.153701	9.78249	0.783627
							11.3231	0.978015	13.5868	0.999247	19.5931	0.971985	15.0496	0.983767	8.6639	0.98455	6.38042	-0.883665
							18.9666	0.966963	14.4483	0.990184	15.4662	0.905283	15.4317	0.994918	12.7339	0.995626	11.7895	0.99601
							4.67048	0.717346	0.000149214	-0.00470198	16.4712	0.929905	14.8811	0.984744	11.5201	0.996407	11.8725	0.939702
							11.8455	0.770571	12.5382	0.989348	17.4913	0.67994	5.82699	0.872536	21.0667	-0.0848557	14.6642	0.979812
							4.86667	0.865691	14.5128	0.99859	20.3826	0.983716	18.8891	0.965768	17.706	0.986417	12.6183	0.949994
							15.4566	0.941244	10.0314	0.92804	10.418	0.937991	17.9405	0.910408	9.84463	0.984149	8.78702	0.964056
							21.8988	0.981788	9.99684	0.995219	4.9954	0.336466	7.46413	0.606113	3.16228	-2.17091	13.2334	0.987896
							14.2076	0.956393	14.2222	0.927732	17.0422	0.855397	2.94973	0.902611	6.29286	0.853102	10.4287	0.972045
							3.16228	-0.438287	10.9358	0.966274	8.74598	-2.09635	6.35714	0.999879	12.3177	0.238902	9.02427	0.98278
							17.898	0.995931	3.4398	0.215706	21.3256	0.846213	13.6158	0.986999	11.2735	0.676063	9.68948	0.994603
							9.67542	0.992344	12.8182	0.967441	17.7329	0.669363	13.1933	0.996078	6.06313	0.902366	6.99657	0.974146
							12.7707	0.992559	10.7859	0.998264	2.98721	-0.109492	17.6678	0.98318	10.6492	0.958752	17.5437	0.998953
							17.9128	0.994336	19.2281	0.977544	17.9599	0.987584	20.1188	0.968662	3.99759	0.881098	17.1325	0.938493
							16.0669	0.974517	15.6589	0.880831	13.7581	0.999044	15.5648	0.979211	7.17636	0.988615	8.59296	0.963437
							4.50612	0.813252	11.6867	0.977998	9.65554	0.984181	14.5678	0.99443	15.1111	0.993249	11.8581	0.997316
							11.5331	0.922477	12.1291	0.955401	15.2725	0.993382	13.6515	0.981274	15.6828	0.962476	11.3848	0.98667
							14.5177	0.938587	15.9048	0.952428	19.7281	0.994412	10.0177	0.987471	17.1973	0.839064	21.0514	0.968589
							4.90624	0.904641	5.24215	0.989667	17.7625	0.961578	3.25517	0.448283	15.1317	0.968498	11.8572	0.822432
							18.6387	0.990073	5.02855	0.769358	22.2147	0.897968	12.5588	0.999252	5.25837	0.943273	5.93387	0.957317
							13.6583	0.973504	13.6804	0.966933	20.8222	0.966274	16.2029	0.996925	19.1078	0.99534	12.8797	0.970886
							16.6823	0.996295	15.7621	0.98101	6.58851	0.990927	12.5836	0.969882	11.2421	0.985807	0.568483	-0.0789111
							7.04764	0.971321	14.6887	0.998242	26.6612	0.891609	12.557	0.997719	10.2125	0.999263	6.46548	0.990349
							8.39741	0.986289	13.197	0.998405	9.19796	0.938488	17.9466	0.982375	10.3699	0.902518	8.21169	0.991824
							21.2735	0.954952	16.4329	0.967889	14.1706	0.972469	9.55359	0.991497	1.44868	-0.382023	13.6144	0.991974
							21.754	0.993034	16.9102	0.994165	15.8287	0.960123	14.7632	0.985341	13.8476	0.983763	13.9641	0.998055
							13.303	0.909309	9.95704	0.784457	21.9407	0.711139	13.2116	0.97653	13.5619	0.991773	2.4447	-5.49986
							16.8496	0.996132	14.9776	0.973976	18.2422	0.911453	11.699	0.965718	7.42038	0.959734	13.3588	0.951533
							0.000149098	-0.00785608	26.0637	0.980938	19.1881	0.953237	21.0541	0.989775	13.5684	0.984817	10.0164	0.976318
							10.6713	0.796441	14.5969	0.976714	15.8116	0.985846	1.78065	-1.77452	5.45384	0.669933	3.8623	0.974126
							21.4684	0.955202	17.4906	0.993902	33.2415	0.976974	12.236	0.958373	16.0314	0.995073	11.7146	0.993199
							18.9809	0.954068	17.4186	0.988468	17.4657	0.954366	7.40049	0.783443	3.24942	0.241629	5.32206	0.965217
							15.417	0.994237	12.6379	0.987997	20.8424	0.892327	17.021	0.995075	16.5715	0.997529	8.9739	0.980077
							11.5087	0.941956	13.7537	0.996902	15.4727	0.921662	12.5363	0.990405	10.1799	0.996568	4.55365	0.95664
							5.89801	0.761693	16.3887	0.996381	20.4331	0.950692	12.2726	0.998743	7.9406	0.998483	18.8431	0.971103
							2.43578	0.0867484	14.6979	0.978262	10.9602	-0.302177	12.2338	0.970638	1.1149	-0.344426	18.5235	0.889671
							15.9693	0.958557	11.0415	0.994026	6.94771	-0.816116	22.5044	0.978654	7.33622	0.603442	6.71494	0.625259
							8.43661	0.993112	12.9901	0.937385	12.1231	0.969468	0.00178905	-0.00038038	13.189	0.981945	6.09975	0.67228
							7.84123	-3.10841	12.5955	0.999094	8.48965	-4.15258	13.5764	0.993695	13.5139	0.863697	1.43727	-0.25826
							8.02799	-18.1887	21.8234	0.988254	15.1683	0.965487	14.4415	0.99113	3.62202	-0.124344	8.3102	0.991552
							19.6954	0.967195	14.8191	0.865855	20.7948	0.620931	10.5346	-0.833858	3.02048	-0.562828	8.37031	0.978477
							13.7208	0.689233	14.8931	0.994813	14.7023	0.839774	11.376	-0.290918	5.82727	0.91047	13.4519	0.98449
							15.1779	0.712057	14.3053	0.996086	12.0738	-9.25216	2.42953	-0.768602	13.2088	0.991566	18.1598	0.9763
							14.4143	-1.18907	14.0579	0.984266	6.7793	-2.37535	18.3197	0.946171	13.6127	0.823556	12.9114	0.95085
							10.7018	-1.02248	11.4883	0.994095	18.797	0.986872	11.5596	0.808385	9.97631	0.980092	10.4703	0.988303
							14.0028	0.997125	14.3421	0.998413	22.0114	0.975823	14.8269	0.942166	3.82823	-0.551244	13.6123	0.991111
							10.1546	-5.38034	13.929	0.997812	18.7291	0.925208	15.1392	0.988265	4.6826	0.933846	11.91	0.90753
							0.00106027	-0.0127	14.8017	0.913646	15.1219	0.938054	13.4615	0.993119	9.34903	0.997641	15.8372	0.914566
							3.63667	-3.53115	10.4733	0.98444	12.2224	0.864245	17.2663	0.968907	0.41914	-0.0377124	3.69055	0.0409239
							0.219827	-0.0180677	11.0473	0.995725	20.8779	0.938114	16.0675	0.992829	10.2139	0.61979	4.96959	0.667185
							15.7589	0.91045	19.4738	0.896561	22.5646	0.987197	15.8812	0.948942	11.7421	0.998055	1.1211	-0.106421
							7.84516	0.362038	9.29185	0.793791	24.4785	-1.14459	10.8676	-0.184761	14.7898	-0.124699	15.2632	0.99651
							7.4685	0.749149	11.5949	0.977792	19.406	0.99685	10.6156	0.974601	13.3633	0.897201	12.1282	0.68794
							15.9457	0.50042	6.45137	0.912731	14.3017	0.969999	13.7989	0.975764	11.6518	0.965908	3.54867	0.977393
							1.39278	-0.880081	19.1546	0.983958	22.2142	0.951954	14.2878	0.94794	0.000149383	-0.0186981	13.3261	0.998091
							18.1304	0.995672	14.4335	0.994621	4.49895	-0.0834172	14.985	0.733269	22.3107	0.97403	6.82208	0.757278
							12.8365	0.99534	14.8788	0.979588	5.72678	-0.376119	15.4922	0.996211	12.4612	0.889211	13.3926	0.992761
							15.4542	0.976937	14.4628	0.949096	19.5433	0.967626	14.606	0.965442	15.073	0.997921	7.62323	0.638459
							14.692	0.996327	15.8805	0.994391	20.2348	0.990239	17.1969	0.997637	0.00384309	-0.00421025	1.67479	-1.1889
							14.6184	0.4528	18.3317	0.989792	17.7032	0.982943	15.6624	0.959576	15.8059	0.966613	9.51471	0.996177
							0.585174	-0.0221668	18.3811	0.870733	15.7342	0.973516	15.6016	0.993656	6.569	0.744016	12.2983	0.996038
							13.3844	0.9663	16.4213	0.991652	23.2236	0.862221	18.0998	0.971959	19.2058	0.988156	4.62261	0.993728
							6.73891	0.951648	17.8993	0.988274	13.2362	0.976176	20.8377	0.992537	12.8405	0.99649	6.1753	0.984475
							5.29755	0.974615	11.4279	0.897699	17.8165	0.942846	2.08138	-0.582321	3.21797	0.839331	5.6359	0.964108
							10.7257	0.992588	0.00113437	-0.00340032	16.6205	0.994302	0.134465	-0.552589	7.24953	0.812758	15.3596	0.996507
							8.01882	0.926979	13.6263	0.976503	23.8261	0.956211	14.1376	0.991965	12.7251	0.983514	11.0872	0.980712
							14.0744	0.91917	12.4058	0.944912	20.991	0.940789	18.0813	0.997367	11.5674	0.950799	6.13642	0.950431
							11.8845	0.975104	15.0367	0.99652	17.9982	0.980241	12.8699	0.977221	13.167	0.80767	10.8721	0.989022
							8.3299	0.984085	16.9387	0.994574	18.6941	0.98177	9.72293	0.975845	15.9333	0.991904	15.5278	0.973599
							0.0086342	-0.392578	14.2082	0.937412	16.9981	0.971445	15.9425	0.979513	3.27378	-0.323519	0.0049861	-0.107115
							5.40539	-0.119273	18.2254	0.934261	17.6554	0.956367	16.1483	0.960024	12.398	0.998347	12.7218	0.975285
							10.1124	0.983563	13.0495	0.998532	17.4224	0.981108	14.668	0.95274	2.30691	-1.96158	10.5206	0.999954
							11.0929	0.811597	15.4376	0.998564	21.9753	0.873098	16.0648	0.996204	14.6946	0.990218	9.77448	0.969897
							18.4543	0.870359	9.36066	0.740591	15.9879	0.908237	15.9688	0.994462	17.0874	0.921839	7.58506	0.152114
							14.6393	0.461378	17.3313	0.9162	20.1464	0.61945	11.5327	0.986137	5.38941	0.802704	6.98953	0.828433
							9.33131	0.993756	15.8462	0.983626	16.4343	0.915908	15.0553	0.997503	13.1133	0.980062	4.16134	0.986677
							7.92626	0.946329	7.42802	0.944239	19.0792	0.973687	11.142	0.928404	4.7458	0.904551	2.503	0.816429
							8.9558	0.970949	13.5442	0.948744	30.8709	0.918875	21.3481	0.995684	3.11316	0.219504	5.72622	0.899668
							9.18145	0.972729	9.81156	0.991334	19.9971	0.885978	12.4985	0.983565	10.3654	0.943078	7.32685	-1.99497
							8.24439	0.881196	14.7854	0.859134	15.7183	0.994355	11.6472	0.990094	1.42505	-0.708669	11.2487	0.892357
							13.3931	0.998851	6.74694	0.699305	16.1856	0.875309	15.4937	0.980084	15.7257	0.905287	11.7841	0.999235
							5.11547	-1.90597	18.9625	0.887932	15.9502	0.968598	15.2355	0.979508	3.191	0.855602	0.0646728	-0.336156
							11.7013	0.935786	15.1749	0.958705	23.0739	0.714472	15.8978	0.995087	8.75729	0.975743	5.09785	0.945626
							13.5487	0.971023	14.2142	0.987267	20.6515	0.943497	15.6681	0.975494	12.6239	0.913093	3.56173	0.966987
							11.0974	0.998012	10.7941	0.914921	0.675116	-0.0538477	12.4015	0.980225	11.7006	0.965075	3.81059	0.952991
							13.0281	0.999551	16.8338	0.97819	25.2082	0.98203	15.1541	0.994971	14.9437	0.959694	3.2722	0.849035
							10.3189	0.971299	13.4502	0.996956	20.0991	0.409026	14.7122	0.993999	18.2294	0.991882	7.63506	0.948195
							5.61285	0.631792	17.7125	0.827694	8.70535	0.339609	8.37448	0.995093	10.4641	0.959458	13.7227	0.994796
							3.03684	-3.43751	16.0453	0.988102	0.446612	-0.080549	17.22	0.949807	8.49695	-1.03632	6.80196	0.977081
							9.04388	0.957859	20.6165	0.984989	15.9123	0.997501	12.9115	0.989208	3.77351	0.639053	2.9815	-0.564253
							4.768	0.587994	16.9809	0.97309	22.3753	0.927681	13.7063	0.984506	16.6306	0.97468	8.08784	0.99667
							9.22434	0.97471	14.4326	0.98964	15.3121	0.283455	16.8361	0.995212	11.4928	0.889623	6.67281	0.988444
							11.0565	0.978206	8.17061	0.940381	26.2339	0.965306	14.689	0.982652	9.41821	0.972798	10.3153	0.816464
							13.3358	0.946744	15.4546	0.963679	20.8062	0.874224	13.6948	0.978068	13.4168	0.977255	2.97403	0.311403
							13.634	0.983827	19.9228	0.967667	15.5838	0.982901	12.7855	0.999713	2.44205	0.507059	3.51149	0.986755
							7.2363	0.988692	11.7853	0.998742	22.1691	0.57791	13.954	0.965716	7.90715	0.789041	9.68787	-0.0725445
							14.6842	0.997824	18.8238	0.981417	20.3379	0.93372	5.99347	-2.4277	16.1351	0.989906	7.42777	0.994027
							11.6387	0.907109	13.1713	0.992002	10.112	0.561333	17.4579	0.965431	10.4049	0.975982	7.45581	0.97012
							13.3904	0.929907	12.782	0.99499	17.2473	0.980428	15.2847	0.988528	16.4628	0.861403	4.33598	0.811549
							15.5747	0.933242	17.2641	0.991535	20.3718	0.966563	14.4286	0.94048	1.65143	-0.540982	4.40228	0.925689
							18.3238	0.845803	12.2368	0.996153	26.144	-13.0409	10.7313	0.985965	10.9892	0.166006	2.52552	-1.35144
							13.6384	0.685979	12.2706	0.974685	25.5153	0.84678	13.5211	0.995899	2.03976	0.892392	2.8807	0.863909
							10.7588	0.979347	12.1367	0.999388	17.4976	0.988767	16.8909	0.997965	12.3795	0.889457	10.6936	0.998669
							6.75377	0.990467	14.3403	0.960924	29.7396	0.836564	16.2679	0.983777	7.04904	0.478094	2.62387	0.597936
							15.0688	0.996927	7.46707	0.927323	14.8806	0.973507	15.8272	0.997431	12.226	0.925156	5.8927	0.936365
							12.3653	0.947546	11.0281	0.96793	24.4925	0.959853	14.1535	0.977177	12.9839	0.983947	4.5394	0.915896
							5.62539	-0.00722772	14.8976	0.957292	18.8274	0.987082	14.2546	0.899985	12.1332	0.925953	15.5919	0.998885
							20.2212	0.992461	16.3503	0.99343	9.76095	-1.96207	14.482	0.998492	16.0115	0.727567	11.2306	0.996254
							19.6905	0.993839	11.6656	0.991014	13.6992	0.987145	17.8968	0.984803	5.07958	0.894183	11.2267	0.977955
							8.41025	0.999346	13.168	0.975533	43.2583	0.947396	13.767	0.996382	14.7392	0.99879	2.3706	-18.5631
							14.724	0.989421	4.56693	0.935723	17.1916	0.977358	20.0218	0.929215	9.38316	0.999592	11.9053	0.999094
							6.21147	0.769312	3.78323	0.798661	12.9359	0.753747	18.4136	0.958378	0.00688703	-0.0332465	3.79507	0.822769
							1.85485	-1.16337	17.0352	0.997678	15.3169	-0.21947	19.467	0.980801	13.3094	0.778667	2.6943	0.505398
							8.03311	-1.36382	10.2889	0.958647	23.7688	0.813676	9.67872	0.190161	13.1228	0.684222	9.78602	0.959884
							17.232	0.994169	16.5017	0.861366	14.1261	0.992488	19.162	0.95228	12.4441	0.988809	10.0744	0.998778
							13.8701	0.978663	18.9269	0.984437	10.6732	0.928065	10.1326	0.973263	11.2391	0.985558	1.91599	-0.325763
							10.2589	0.691645	15.3956	0.98777	19.1878	0.993767	0.0439271	-0.124612	12.3312	0.911194	11.3464	0.99322
							13.7063	0.97929	7.22164	0.962422	18.7792	0.977281	2.25504	-16.1831	16.7103	0.990442	9.72105	0.997586
							19.2046	0.900251	9.91233	0.995098	0.00414909	-0.442398	13.7873	0.998914	10.0481	0.972934	7.44835	0.961838
							13.9667	0.929139	12.8782	0.997147	15.103	0.986509	8.37212	0.997988	13.4629	0.997624	8.95369	0.992092
							9.94955	0.991003	14.2162	0.996438	20.7643	0.989598	13.4845	0.991995	13.9677	0.999136	14.654	0.999152
							16.0127	0.99049	14.4841	0.981299	23.8638	0.985463	9.90639	0.971071	6.88229	0.834949	9.47099	0.989098
							15.3951	0.907392	11.0344	0.982039	20.8518	0.956876	7.55112	0.96359	11.7858	0.93126	14.2997	0.994468
							11.3563	0.983019	11.3231	0.985028	21.5061	0.890821	14.1386	0.977373	1.97783	0.325213	10.6434	0.982092
							12.6346	0.992657	16.6849	0.987736	17.5016	0.502973	10.0063	0.988849	9.07426	0.936513	3.92484	0.705492
							10.2046	0.998411	16.9353	0.996865	19.566	0.969617	10.6823	0.907995	15.7934	0.989371	11.6653	0.9925
							7.27035	0.466135	13.8049	0.990276	5.50078	-0.606639	19.4171	0.984378	12.3907	0.981571	9.55238	0.941708
							14.1511	0.989087	14.9302	0.998636	13.4044	0.995782	14.8019	0.969115	6.63532	0.994146	12.4558	0.999736
							20.1118	0.937558	15.5474	0.989319	7.26497	0.650533	10.6976	0.883403	13.398	0.999178	5.15023	0.988093
							9.93112	0.990797	9.50172	0.954806	5.3933	0.787917	21.6969	0.9935	10.7248	0.998147	12.3518	0.98848
							13.9595	0.996854	14.8659	0.93909	25.7261	0.712594	9.33401	0.530207	9.03531	0.662932	10.1309	0.920953
							0.0476528	-0.241523	15.5161	0.997982	14.7934	0.980161	18.0003	0.998598	7.94396	-0.531666	3.44529	0.921373
							1.6517	-5.47432	18.0474	0.993059	13.9085	0.845502	10.5804	0.994749	17.0041	0.977203	17.8173	0.997388
							15.617	0.965962	16.2168	0.9776	13.6285	0.942097	15.8694	0.911369	11.4516	0.775404	9.10611	0.975114
							13.8068	0.998642	16.6672	0.992701	16.1145	0.944763	12.5904	0.880391	10.8341	0.960701	6.11682	0.458769
							17.138	0.938473	16.9894	0.999059	15.5235	0.988669	3.24975	0.856735	21.1508	0.982806	6.39732	0.951213
							12.8206	0.994927	18.9927	0.947599	15.3897	0.769748	20.2994	0.920243	8.10129	0.663117	14.0026	0.998041
							13.9021	0.985783	18.253	0.990831	19.0873	0.989405	14.9481	0.994396	13.0366	0.987507	12.5506	0.989326
							11.9651	0.888096	14.3594	0.969797	17.3818	0.988411	15.2785	0.936369	5.98077	0.950866	1.56515	0.0088687
							14.2887	-1.93769	10.4007	0.571004	12.7164	0.896682	10.9387	0.984849	17.1684	0.995918	2.5974	-0.0481704
							9.23395	0.161668	17.8408	0.910837	13.0019	0.944892	11.9399	0.953651	13.0223	0.958934	5.49664	0.768004
							13.6796	0.980583	15.6198	0.864436	31.5821	0.935693	14.4862	0.937805	10.0905	0.977584	11.9063	0.496823
							11.4078	0.933719	14.1297	0.983506	20.3784	0.603966	8.78655	0.971908	17.2594	0.936427	7.04505	0.960889
							13.1703	0.986749	4.39369	-0.903471	19.2016	0.989641	17.1477	0.985501	13.6714	0.989912	12.7642	0.965586
							23.4937	0.898992	15.2605	0.938226	18.1767	0.994333	20.4268	0.970213	4.75648	0.875437	5.78119	0.973173
							18.8322	0.89829	8.11672	0.951552	28.128	0.911487	15.2035	0.997123	10.04	0.994189	5.4871	0.880102
							13.8886	0.982082	15.8294	0.990912	10.9889	-0.79407	8.94692	0.984842	7.93314	0.976123	1.80506	0.459336
							15.1242	0.997617	9.9084	0.986518	16.9797	0.978567	13.0244	0.958794	14.7636	0.998676	10.2288	0.915296
							18.3958	0.968855	19.7618	0.919649	18.6664	0.749722	17.1135	0.978168	14.7515	0.984917	11.4688	0.993546
							16.3186	0.905525	5.60329	0.987885	18.2272	0.993803	16.7234	0.994929	5.18358	0.947549	14.4883	0.944239
							16.511	-0.47647	15.0021	0.989526	20.6421	0.963468	13.5121	0.996287	12.476	0.999386	16.7429	0.983624
							13.4487	0.993199	20.5134	0.912654	11.9843	0.39919	13.9176	0.998116	5.55637	0.987752	4.97403	0.883741
							18.3753	0.951856	16.8669	0.970173	13.4651	0.958546	10.9353	0.98964	8.37512	0.982368	13.4011	0.963678
							11.0667	0.99853	14.1377	0.996556	9.88869	0.974921	16.2877	0.985047	14.5843	0.995568	13.3295	0.9954
							14.3531	0.967532	15.3553	0.994428	21.0803	0.757293	13.7231	0.83772	11.1325	0.999209	0.000151016	-0.0675762
							19.8803	0.998657	12.9479	0.958831	16.9069	0.929009	11.3997	0.998426	1.5414	-0.267499	7.06794	0.932724
							16.9476	0.976427	20.6917	0.993305	22.5041	0.987843	6.01506	0.0348571	5.12163	0.965146	13.1564	0.997074
							18.6354	0.969063	11.9724	0.974238	35.7689	-0.0527678	17.0055	0.999089	5.44128	0.842931	3.29502	0.797248
							22.8094	0.911935	14.9275	0.964186	22.1511	0.986231	13.8295	0.927755	7.1379	0.993738	5.92433	0.94502
							14.0798	0.970712	1.06241	-0.278806	17.2091	0.973062	14.5605	0.993812	13.9879	0.991421	7.60512	0.804808
							3.00008	0.347035	12.4335	0.991061	17.4426	0.97269	14.3558	0.998075	4.5233	-1.57164	9.08266	0.968899
							16.1761	0.990128	8.93222	0.911866	16.0992	0.973452	18.7208	0.998604	0.00932954	-0.507911	4.15432	0.963696
							10.8089	0.827862	4.87744	0.0729789	18.1504	0.981322	15.9961	0.991661	12.9785	0.991161	14.4946	0.982278
							15.2179	0.992496	14.8497	0.98459	16.0727	0.9619	13.2591	0.979874	17.7979	0.995779	1.81615	-7.55359
							2.38904	0.632558	17.6921	0.97881	24.1666	0.587684	11.0545	0.986734	11.0716	0.971458	6.94875	0.994823
							4.98306	0.16757	11.0679	0.833745	22.1996	0.908823	25.0209	0.978468	13.3326	0.837656	7.41038	0.992098
							15.0564	0.943051	11.9512	0.9477	14.629	0.992838	10.7877	0.998139	5.29586	0.699555	7.04199	0.930409
							11.1111	0.981463	11.0087	0.563655	5.49375	0.671758	17.7156	0.998733	10.0834	0.985097	0.00197835	-0.0216274
							7.47124	0.865768	12.5033	0.996287	12.4202	0.746192	0.00401937	-0.0281646	18.1573	0.997724	6.14076	-1.91334
							21.0198	0.994061	9.45623	0.887687	20.6238	0.992201	2.38247	-1.00429	0.000149012	-0.00080089	1.72455	0.455007
							7.59337	0.651075	13.034	0.998196	21.2881	0.968421	9.44776	0.967576	9.30846	0.937071	3.62065	-3.05645
							15.6465	0.856092	2.41826	-25.9995	11.6535	0.846224	12.5286	0.991708	4.32982	0.772928	4.35678	0.979591
							5.92031	0.570206	13.2611	0.968175	15.5766	0.907912	16.5217	0.991153	5.98266	0.688929	7.44546	0.631376
							13.3285	0.962287	12.88	0.997489	19.3052	0.943655	19.7961	0.995456	13.0979	0.94259	1.67269	-0.569316
							11.0045	0.635651	22.2521	0.9859	24.2591	0.953501	9.0734	0.910699	11.0474	0.999074	8.28087	0.937195
							19.5762	0.965454	4.33627	0.75161	21.0091	0.975092	9.73692	0.985718	12.4903	0.998023	4.79045	-0.0124267
							14.0748	0.998237	11.9921	0.975047	15.5928	0.981745	12.1836	0.907604	1.4749	0.000293175	5.57112	0.880637
							16.5559	0.992163	12.8189	0.99587	17.9251	0.963886	17.8441	0.922568	14.0584	0.983806	11.8426	0.973304
							7.15165	0.988236	13.7441	0.969707	9.6592	0.361003	13.5286	0.99695	11.3925	0.990196	5.48788	0.956577
							8.47982	0.998702	17.8301	0.965624	14.9518	0.930084	18.2116	0.931032	13.4535	0.950847	7.40921	0.423572
							10.2558	0.988588	16.0101	0.99713	19.8597	0.970736	5.83556	0.373913	6.23058	0.894504	1.57037	0.35741
							3.24298	0.545445	12.6463	0.99368	20.9043	0.97173	14.2047	0.932674	19.5954	0.990709	9.01793	0.948982
							16.2284	0.983772	1.58041	0.40102	16.3647	0.935169	13.0532	0.973722	7.97486	0.83007	15.2987	0.992113
							16.3512	0.975377	7.17047	0.999033	23.5827	0.971928	19.5941	0.578178	10.5426	0.986025	4.59114	0.851804
							14.1093	0.951469	15.081	0.984173	17.735	0.974825	7.74529	0.90557	11.3994	0.795957	5.48476	0.972857
							6.94886	0.19199	14.4221	0.392007	14.679	0.968264	8.97995	0.98681	10.6783	0.858772	7.53607	0.974885
							12.3136	0.974713	12.9264	0.999561	19.0396	-0.0111546	16.8471	0.992075	2.16776	-0.974754	5.24025	0.865852
							6.85805	0.617869	14.5802	0.98067	21.3304	0.98553	13.8125	0.997507	12.5511	0.933415	9.63138	0.988597
							24.3015	0.985599	15.3121	0.982938	18.0052	0.99596	18.9578	0.991449	5.90227	-0.51008	11.3864	0.975048
							0.0444356	-0.485027	13.8363	0.962924	18.6353	0.987593	12.4407	0.947198	11.9124	0.758319	9.02386	0.987151
							17.2979	0.958476	0.000149522	-0.0730776	17.999	0.981083	14.7499	0.99215	14.6323	0.995081	8.54713	0.930103
							10.9115	0.727724	11.006	0.994518	26.5423	0.939106	11.0738	0.927636	12.8502	0.983421	9.93222	0.388539
							20.4546	0.959014	24.4984	0.951713	11.6026	0.994894	10.8129	0.99211	17.9652	0.934594	12.4538	0.994786
							10.8072	0.992431	15.4252	0.986387	20.6173	0.987085	15.9425	0.970605	13.8031	0.941142	13.5841	0.918001
							15.9283	0.945866	13.5151	0.997538	19.3586	0.990254	12.0915	0.769736	3.65426	0.699938	0.00254728	-0.0905355
							12.9338	0.915597	13.6712	0.993889	17.5002	0.852046	13.5384	0.995314	17.2192	0.994236	17.638	0.996624
							15.4832	0.648865	14.3186	0.999006	15.3214	0.747162	10.7041	0.941285	6.29938	0.997064	9.40544	0.964121
							10.0182	0.976753	19.8801	0.973114	19.9319	0.973511	12.3388	0.993031	2.62608	0.96736	5.07194	0.791459
							14.5352	-0.743232	11.9262	0.931686	11.5404	0.960602	18.5464	0.902172	13.1474	0.999036	6.10147	0.924365
							15.5138	0.992653	17.9096	0.977082	15.1157	0.664693	14.6774	0.993491	13.3541	0.960823	5.36792	0.777885
							4.44021	0.869294	16.5046	0.954522	15.9652	0.987312	14.7061	0.991457	9.67344	0.927703	12.4032	0.911389
							5.0962	0.895362	15.1725	0.991173	22.7967	0.993312	13.5357	0.997021	0.00519754	-0.000354567	9.69613	0.983717
							15.5847	0.978469	14.1237	0.957919	9.43504	-11.2764	12.6986	0.959441	6.77186	0.997367	4.09021	0.921518
							22.2026	0.964475	14.1156	0.994842	10.4874	0.988295	9.66946	0.971119	5.33652	0.956721	8.15136	0.923584
							16.2492	0.989434	14.4419	0.990156	7.05354	-0.09322	8.13351	0.81634	6.81383	0.901316	13.6196	0.989956
							3.06393	0.717621	13.3638	0.967553	17.0201	0.972447	10.601	0.92527	3.80131	0.313481	8.96082	0.93277
							12.4405	0.780319	13.7242	0.998471	14.2625	0.958506	6.17076	0.927913	7.48319	0.998962	4.78724	0.675871
							10.3326	0.320186	6.16867	-1.10019	9.46079	-2.09432	13.6376	0.910623	9.79565	0.0311629	4.8006	0.0105181
							11.0225	0.938109	10.2892	0.993777	26.5141	0.969843	10.2125	0.994548	8.96307	0.790247	10.95	0.882661
							13.246	0.999359	14.0629	0.977513	13.95	0.862172	6.5125	0.920489	9.34907	0.876499	0.0865714	-0.357278
							8.97646	0.781191	11.4615	0.975375	12.0682	0.942894	14.7162	0.99046	7.23476	0.981399	12.0176	0.891616
							19.3253	0.995034	3.10274	0.960147	16.6051	0.994161	18.7693	0.997205	4.68656	0.952592	8.06671	0.929612
							15.5897	0.989645	18.5356	0.971659	24.0019	0.8886	4.95958	0.912387	10.729	0.998284	11.4634	-0.938652
							14.5674	0.959533	14.1411	0.989275	2.44129	-1.2981	14.0484	0.998475	9.76921	0.988903	12.6894	0.963467
							13.9114	0.98532	12.1037	0.975091	25.0088	0.973389	16.0228	0.928086	0.00716042	-0.00918315	15.2696	0.977246
							16.3144	0.998913	11.8262	0.994029	24.5101	0.985762	12.239	0.350654	5.58945	0.94825	16.3731	0.996068
							15.9333	0.986643	5.37836	0.88301	12.7878	0.973421	9.49227	0.961399	13.1299	0.992028	3.45208	0.91435
							19.8177	0.982604	16.9117	0.984958	16.5852	0.938237	14.3009	0.996505	8.55298	0.960638	14.7099	0.998309
							14.4309	0.985261	8.45695	0.94748	23.0674	0.246936	13.8357	0.825616	2.41442	-1.13923	1.31942	-0.125691
							14.6845	0.996181	12.5259	0.9819	17.1711	0.946885	6.96352	0.0512191	8.20431	0.962296	17.9148	0.976438
							6.27268	0.406944	14.1803	0.987085	17.7404	0.992684	16.4356	0.980538	5.24566	0.896055	5.9114	0.993172
							17.3768	0.996621	17.1615	0.987903	21.7422	0.991703	9.65032	0.462764	14.4597	0.992312	6.46795	0.986919
							21.4244	0.993075	11.4733	0.975938	22.357	0.887948	11.4863	0.957498	6.74745	0.782256	10.6407	0.973807
							20.8976	0.975188	11.7546	0.977809	5.10931	-1.49143	6.26214	0.839835	12.8287	0.992261	11.304	0.9949
							11.0904	0.953481	14.1116	0.997128	27.8548	0.914636	11.0284	0.984855	13.7145	0.998703	8.18619	0.986112
							3.24674	-0.191279	16.8815	0.976191	17.4016	0.940522	10.3378	0.950142	5.78982	0.740282	12.6739	0.924683
							16.2557	0.99808	17.4238	0.877637	17.0245	0.9221	13.5873	0.969513	16.5447	0.986153	7.97489	0.98089
							26.3309	0.97238	7.21468	0.991174	28.5117	0.724688	9.1098	0.99228	12.4248	0.991437	9.49492	0.884427
							1.21483	-0.0848607	11.0571	0.99779	16.7271	0.994908	10.1746	0.998509	4.95382	0.99951	1.10203	-0.111422
							22.491	0.885994	15.3402	0.995923	30.3542	0.979948	12.1987	0.95925	13.4441	0.984625	2.69133	0.460563
							12.7958	0.942028	10.4222	0.994231	18.0879	0.955275	1.03966	-0.141755	14.2169	0.999165	4.4382	0.990137
							16.0141	0.992653	15.9756	0.997368	6.378	0.974087	11.1513	0.940461	9.00934	0.993731	10.0886	0.986399
							21.9744	0.991561	11.054	0.970464	17.4261	0.863786	13.7533	0.999384	11.0476	0.994581	7.61644	0.789766
							14.8921	0.930442	2.31351	-43.4063	14.839	0.993767	13.2817	0.916734	7.86631	0.955883	15.2609	0.910169
							20.173	0.992891	15.7822	0.992147	15.8564	0.985188	18.3175	0.994993	12.4891	0.985981	11.0028	0.93909
							18.2714	0.985899	16.107	0.92902	15.8982	0.990653	10.6882	0.896546	3.69101	0.858449	1.35285	-0.0188795
							14.4668	0.982749	5.32111	0.893305	19.5236	0.259419	19.577	0.978619	18.1159	0.865925	22.2916	0.98068
							0.00352366	-0.437268	11.524	0.904141	19.7612	0.893635	15.1608	0.965096	4.8258	0.998255	6.84537	0.933211
							7.25928	0.767614	12.3324	0.990746	17.1266	0.995196	14.7164	0.92608	1.15147	-0.544379	3.36426	-3.1917
							18.8756	0.901042	21.7029	0.941502	18.7699	0.975338	10.6139	0.980258	13.8153	0.984931	14.5288	0.954765
							16.4565	0.99171	15.0148	0.9724	0.0216932	-0.532856	12.761	0.980384	9.27364	0.995708	8.87756	0.98102
							16.5745	0.981039	15.1092	0.999019	9.98416	-0.220951	16.4766	0.949474	7.63886	0.969948	7.95251	0.998932
							18.1659	0.993937	0.00014928	-0.00031608	14.1949	0.978053	15.0823	0.982681	11.8491	0.990174	10.9865	0.967698
							8.04601	0.868106	8.13817	0.220726	12.1764	0.999072	12.9763	0.98299	7.59674	0.568959	8.53044	0.952807
							19.6691	0.993164	17.9365	0.98532	13.2584	0.96791	10.8786	0.964034	9.68577	0.875283	15.3105	0.997547
							13.4397	0.662346	15.1408	0.974096	16.2886	0.959151	11.1574	0.992789	2.26856	-2.73853	7.52517	0.969733
							3.62739	0.799543	16.5476	0.896633	20.7825	0.985257	2.52204	-0.364465	5.48903	0.823772	8.8595	0.992117
							19.3948	0.977267	12.5693	0.977522	17.2557	0.991993	5.78831	0.784654	4.08673	0.957701	2.9873	-1.44363
							33.6105	0.983011	17.4724	0.975243	8.84668	0.271202	15.3255	0.989046	8.31968	0.895884	15.8402	0.998882
							16.1841	0.979101	14.8218	0.919113	15.1725	0.870966	12.8991	0.99054	10.5508	0.993182	10.8067	0.941508
							14.2907	0.941535	11.5321	0.989932	16.7272	0.957044	11.1618	0.91931	13.903	0.819388	8.2864	0.96407
							19.672	0.987217	5.16204	0.983097	12.8289	0.919362	8.33923	0.971402	3.25657	0.305586	8.54874	0.996684
							4.90027	-1.96781	17.7477	0.996799	15.2657	0.98382	9.4778	0.960648	1.7793	-1.58834	2.07121	-0.0498204
							22.7628	0.927425	17.6456	0.998751	14.2646	0.891834	16.7673	0.965544	7.91841	0.989701	10.9435	0.975254
							3.63318	0.665766	18.166	0.992749	13.2872	0.96514	0.994297	-0.185558	5.9966	-0.37613	2.13603	0.398361
							19.1243	0.868606	19.669	0.945185	16.355	0.920222	5.83624	0.709884	7.45418	0.96603	8.81743	0.994208
							25.9072	0.909609	19.5118	0.938567	21.5704	0.990302	14.6318	0.990219	6.50714	-3.94568	15.1856	0.995037
							6.62008	0.494921	12.9079	0.986501	11.6294	0.893008	11.7539	0.959869	6.42161	0.925599	7.11141	0.989452
							2.61518	0.917885	13.9253	0.991036	31.7522	0.839996	14.8382	0.978554	16.5806	0.989331	13.6022	0.988989
							13.3083	0.896987	14.382	0.995272	23.8815	0.989828	9.58975	-0.260059	7.56833	0.941892	2.76814	0.564633
							14.5728	0.686541	12.8312	0.927172	19.4687	0.984483	12.5719	0.997094	11.6935	0.975076	13.6927	0.941497
							14.6223	0.858222	12.4192	0.996515	15.7096	-0.591617	12.5897	0.978739	12.8425	0.987863	8.99973	0.89708
							16.4874	0.955708	13.8106	0.843378	14.9041	-8.53779	8.45704	0.889983	16.2947	0.902327	0.0918308	-0.327958
							9.53704	0.967765	12.9267	0.991943	9.67497	-0.284466	5.9465	0.45226	5.16842	0.979129	10.3353	0.997426
							15.6805	0.982366	18.0648	0.995151	15.6444	0.0287087	14.225	0.996332	9.89131	0.998752	12.6685	0.748418
							14.3281	0.982388	12.2096	0.999082	15.0755	0.989856	5.22066	0.984485	10.1374	0.991162	11.6819	0.993152
							11.9733	0.948283	13.6154	0.997482	15.8741	0.661461	9.60239	0.997725	11.68	0.995558	12.9486	0.983127
							15.3372	0.852068	15.1412	0.930155	28.7089	0.237394	11.8671	0.973504	6.42487	0.99054	11.8244	0.215484
							1.63468	0.262386	16.1227	0.946975	17.1801	0.980019	10.3949	0.996227	11.3626	0.999558	7.17743	0.343018
							11.4697	0.915748	18.727	0.915643	10.1064	0.890167	13.6325	0.938778	5.74719	0.928781	7.63882	0.97242
							11.7139	0.991119	14.1654	0.998356	15.02	0.986612	8.97965	0.976924	7.02473	0.985252	12.4625	0.98953
							20.7454	0.984936	2.59422	0.14762	12.5117	0.99844	9.52178	0.946328	13.2127	0.994332	13.0347	0.991706
							21.4624	0.993209	19.2766	0.983529	14.6747	0.969	10.3194	0.85049	7.42164	0.856492	7.74499	0.957349
							16.063	0.899229	15.6072	0.968267	12.2954	-6.5332	17.2062	0.963446	9.5588	0.997327	11.0272	0.996312
							18.0294	0.91435	9.69646	0.99163	16.8068	0.979479	12.7012	0.992196	13.7532	0.964976	10.8659	0.997424
							14.9687	0.72061	12.9183	0.961837	18.0494	0.985574	13.8216	0.984355	12.9698	0.987952	8.70501	0.992563
							17.7956	0.996306	14.2964	0.992446	21.5833	0.978267	3.32308	0.107746	9.47214	0.985297	8.91812	0.994093
							3.07693	0.0257623	16.5169	0.96861	8.94613	0.928054	12.8702	0.984095	7.39787	0.981497	10.3266	0.958918
							18.7032	0.983322	15.6359	0.980428	19.8261	0.937209	10.7715	0.969299	16.1889	0.881215	10.7861	0.860224
							15.5892	0.46724	14.8715	0.943295	16.6503	0.995734	11.6293	0.987692	12.9636	0.990519	10.0088	0.967902
							21.1574	0.97825	18.0354	0.879434	12.976	0.83875	12.2907	0.996514	7.91358	0.947029	10.2233	0.967194
							7.66126	-3.48362	13.6617	0.989233	17.785	0.966835	11.1746	0.973154	11.0997	0.950263	4.0685	0.459915
							12.0915	0.997944	15.2371	0.987402	12.2513	0.971334	12.2564	0.548604	9.32898	0.904621	13.7457	0.928312
							12.0651	0.990285	6.59377	0.51052	11.1524	0.904854	8.73173	0.998621	17.0937	0.99073	6.91417	0.638722
							15.4422	0.899807	15.3367	0.421474	21.4378	0.98773	14.1557	0.997386	10.0104	0.764865	5.97908	0.998793
							7.07295	-0.250275	14.9826	0.946949	8.83621	0.801435	7.39348	0.225552	15.606	0.998309	8.77347	0.985003
							20.7002	0.93122	14.0271	0.998018	20.1171	0.514003	14.2856	0.989635	8.50685	0.0504586	3.99683	0.994789
							11.0091	0.998372	11.147	0.653441	19.0157	0.858703	4.46686	0.975589	2.63455	0.255123	2.56763	-2.16667
							8.5128	0.949422	13.3399	0.998034	16.9151	0.99175	13.9326	0.999246	10.3236	0.924761	8.90485	0.990597
							14.7981	0.995846	14.8808	0.92373	3.40358	-1.70831	11.7963	0.998637	11.5536	0.703106	7.54873	0.985439
							2.21493	-0.940838	0.000149061	-0.11889	20.5036	0.990462	13.903	0.925756	17.7179	0.953898	1.94744	0.298102
							12.0842	0.921641	16.9637	0.928156	19.7051	0.979646	7.40059	0.981873	9.05724	0.985807	16.8212	0.997506
							7.67812	0.795183	15.9205	0.854083	0.00292754	-0.512627	11.54	0.9975	10.1033	0.998252	9.98845	0.929495
							16.993	0.997289	18.6152	0.997552	15.1478	0.67569	12.6987	0.974426	10.1445	0.891761	11.2931	0.579527
							14.8059	0.968762	12.5486	0.483751	1.20019	-0.0228862	7.51755	0.886758	15.7855	0.0757946	10.9806	0.954736
							20.708	0.851297	16.2816	0.994776	16.6331	0.959373	9.41344	0.901163	15.7295	0.986047	9.50653	0.980504
							19.4993	0.856906	20.3455	0.881565	15.1632	0.956644	9.75394	0.791734	1.03195	-0.557497	17.6625	0.98666
							16.1852	0.768751	13.8326	0.981404	18.7353	0.996587	8.23173	0.959218	14.9152	0.957755	16.5908	0.997391
							10.6734	0.842152	14.4631	0.998161	21.1195	0.994881	14.0405	0.302179	5.39727	0.345736	12.3727	0.998735
							14.4695	0.987528	17.7878	0.999037	18.6841	0.99629	10.9749	0.8669	6.68341	0.922727	6.32742	0.944663
							22.1672	0.826705	12.5311	0.990227	20.9817	0.926054	14.4669	0.99217	8.33136	0.978986	18.1772	0.98406
							4.26041	0.766575	36.109	0.948844	17.2338	0.966919	14.4244	0.996477	6.50413	0.958297	10.7049	0.978308
							19.9457	0.988638	15.0891	0.990843	22.0221	0.983572	12.0408	0.994488	7.89843	0.912486	9.19899	0.991893
							17.2141	0.994825	11.878	0.997015	19.3006	0.979651	11.4537	0.938514	8.01322	0.966775	8.48425	0.524012
							14.5573	0.991404	8.86009	0.56264	15.7815	0.953308	13.6194	0.978801	8.65638	0.995194	8.6013	0.972206
							10.9885	0.599447	16.8826	0.978589	14.1512	0.562266	7.39426	0.946452	7.03312	-0.409828	16.8116	0.95105
							20.3717	0.937873	16.0917	0.967101	20.3297	0.971013	0.00386749	-0.0414654	10.0344	0.981929	9.98902	0.982454
							9.98435	0.979488	15.2337	0.996864	19.4371	0.956699	4.93344	0.169631	0.00141316	-0.0290381	8.04473	0.997785
							11.9878	0.984068	15.3468	0.954975	20.7205	0.875394	10.9269	0.932917	8.22173	0.978407	15.4629	0.972255
							12.2001	0.79564	17.3608	0.949166	26.136	0.955057	15.5727	0.995581	14.6118	0.998438	10.4619	0.999489
							16.6127	0.996153	19.0397	0.967346	17.923	0.943194	20.2123	0.33579	16.6552	0.995179	9.58588	0.981561
							25.0219	0.976618	1.24195	-3.11692	19.7182	0.994149	12.0767	0.973286	0.00233331	-0.0624382	4.36956	0.971862
							16.5925	0.990465	11.8619	0.999749	17.8255	0.994934	5.2837	0.764461	17.6783	0.904128	13.4602	0.956523
							20.2932	-1.33504	14.9653	0.992131	19.7706	0.960791	2.44246	-0.0512838	0.00303254	-0.0429204	15.3127	0.994947
							18.0317	0.995291	13.7039	0.998213	14.9435	0.9981	7.54424	0.627263	4.63676	-14.1095	5.46137	0.946645
							14.3686	0.974532	11.9152	0.950888	9.62182	0.0791878	8.15268	0.970521	22.3849	0.898359	11.8203	0.989986
							23.4672	0.816372	12.793	0.981692	17.4144	0.982971	6.57581	0.964217	6.07448	-0.35038	17.1035	0.975449
							18.8406	-0.121962	14.5032	0.996891	10.4873	-0.968538	10.5365	0.788973	15.766	0.699928	16.8397	0.989784
							3.92097	-0.131412	9.62535	0.989124	18.8454	0.97539	5.17964	0.916021	13.7542	0.930072	11.726	0.992735
							19.8775	0.941626	14.4022	0.932835	15.4352	0.828196	2.75713	0.290887	11.1262	0.997886	11.0373	0.969767
							22.9365	0.819585	16.1066	0.944232	17.331	0.996225	14.1353	0.982459	7.42006	0.981504	4.16621	0.614865
							11.4242	0.992558	18.4412	0.9851	18.3935	0.996712	11.1549	0.889115	8.74249	0.998727	3.10152	-1.0396
							12.8366	0.996891	15.4168	0.995815	15.7456	0.930939	12.1948	0.879444	2.31372	-9.10225	9.95656	0.997089
							16.7192	0.995801	13.1735	0.996522	19.064	0.997589	15.5911	0.976171	7.20748	0.818345	10.2021	0.973963
							17.2342	0.956667	13.8009	0.978111	15.8953	0.773888	13.1382	0.974937	14.5761	0.690402	18.2469	0.991488
							14.8452	0.947185	15.6025	0.995987	16.7112	0.672694	7.16582	0.992937	6.66418	-0.0813933	6.40084	0.839682
							15.0385	0.941686	15.0886	0.990674	16.2258	0.371564	2.2998	0.758502	1.88763	-0.149824	14.727	0.97748
							15.1296	0.993715	15.6841	0.887532	23.2625	0.988814	1.46061	-0.0376646	9.52955	0.996631	20.4352	0.991621
							17.5246	0.995958	16.967	0.888809	18.6749	0.986862	13.2757	0.966413	4.8289	0.714609	2.22979	-0.874452
							12.2967	0.940476	9.54925	0.992208	16.8062	0.98013	8.39477	0.94517	13.8302	0.949174	19.0089	0.994286
							10.929	0.971574	14.9777	0.97848	19.5879	0.9929	10.7831	0.129477	10.9394	0.999012	9.46791	0.969929
							17.1391	0.926987	9.12543	0.986958	17.3644	0.994878	8.642	0.925123	12.8287	0.979921	5.12112	-0.121106
							14.7832	0.975653	11.9692	0.994307	25.9095	0.988426	10.8778	0.406389	14.3583	0.868661	10.0623	0.979471
							21.0836	0.852948	17.0773	0.99742	14.8987	0.964416	15.6116	0.976602	10.2859	0.99944	11.2079	0.996031
							21.2343	0.991106	17.5435	0.964479	12.5211	0.658649	9.16807	0.983294	8.93288	0.974508	10.4764	0.92519
							5.38529	0.619561	13.7765	0.977966	18.1852	0.924199	14.3149	0.993292	11.8246	0.983389	5.80429	0.919089
							21.4558	0.969299	15.8431	0.993266	16.9252	0.95291	17.5793	0.986282	6.0187	0.844278	10.9063	0.930046
							16.925	0.993629	2.35536	-0.172084	15.4581	0.060386	13.5172	0.997713	0.606441	-0.040776	10.4053	0.950841
							8.57862	0.170498	17.7089	0.858844	20.9661	0.990808	2.27323	0.311004	8.64043	0.893899	5.34071	0.606454
							14.0741	0.922233	12.8427	0.992015	23.4313	0.986063	11.9579	0.996273	1.90679	-0.301212	13.6339	-10.0543
							15.8591	0.860062	17.3981	0.993771	12.6885	0.861269	16.9313	0.842857	7.37118	0.803078	13.7914	0.980885
							7.69276	0.83993	13.8265	0.948036	16.201	0.977023	21.2517	0.930465	6.74718	0.970186	3.46003	0.924382
							11.0549	0.132418	5.67165	0.95222	0.000149041	-0.0227442	6.66672	-0.601506	12.6237	0.999109	3.33001	0.483346
							12.1142	-0.150407	18.9016	0.985267	18.2563	0.912889	16.6816	0.929097	3.59987	0.19679	6.00141	0.983438
							18.6852	0.97831	12.9461	0.968944	13.824	0.737896	19.2407	0.987011	11.6545	0.869861	7.72908	0.934551
							16.9945	0.970021	18.21	0.940264	17.9268	0.986597	13.9	0.999184	5.01094	0.895557	11.5062	0.949566
							19.0801	0.971155	14.9534	0.997964	14.0226	0.765921	8.53742	-0.54367	18.1678	0.943571	14.5798	0.99773
							4.93832	0.731658	16.3108	0.994815	11.1328	0.992327	19.944	0.94448	1.00655	-0.01765	15.7518	0.986802
							19.7953	0.979373	17.3425	0.996254	14.3037	0.998671	13.4358	0.997192	10.1437	0.998871	10.0982	0.895245
							13.0103	0.986715	10.3738	0.846369	15.8086	0.946839	10.6236	0.971407	4.224	0.817697	5.85733	0.702688
							20.9628	0.960697	11.8592	0.9956	6.16975	0.512096	11.91	0.999545	7.83977	0.952873	14.947	0.99766
							14.7957	0.934475	11.3744	0.996625	22.837	0.9771	14.1385	0.997356	5.85524	0.875721	13.1769	-15.515
							17.1298	0.898676	13.6034	0.980915	11.0532	-2.65263	1.23376	-0.402521	6.86953	0.99171	14.7416	0.934852
							11.5575	0.94484	22.3934	0.991805	13.6843	0.947272	12.0522	0.969788	12.9761	0.950173	2.14824	0.387953
							14.9276	0.969857	14.1038	0.930607	10.098	0.967328	15.7744	0.992857	1.72946	-1.41346	12.7546	0.991353
							11.1696	-0.754327	11.6362	0.984228	11.4846	0.823407	14.8286	0.988756	10.4363	0.889224	13.2508	0.981485
							6.86511	-1.92196	17.6977	0.994384	22.0699	0.962808	11.6371	0.97807	12.1686	0.993193	2.39225	-1.29629
							21.8612	0.968553	17.7909	0.99362	22.2429	0.931823	13.5461	0.977458	21.3826	0.988895	15.7918	0.993004
							11.8542	0.938144	12.792	0.975509	21.2176	0.82801	8.61185	0.831175	14.5356	0.925644	6.75417	-1.76495
							11.3325	0.966284	12.3653	0.947669	7.26928	0.982287	7.78329	0.983137	1.34219	0.00527108	9.01938	0.924368
							17.8296	0.979964	13.6665	0.998893	20.1258	0.872676	12.25	0.997224	9.19928	0.984196	6.8568	0.915309
							14.9194	0.995715	14.5837	0.998994	16.543	0.945975	12.343	0.956697	3.48419	0.594088	14.4395	0.998074
							17.3424	0.982965	16.0939	0.992713	15.9626	0.891421	8.36975	0.936724	11.8922	0.92073	11.7864	0.993414
							10.9825	0.985538	13.9135	0.99837	17.3582	0.979298	12.4349	0.990975	16.6083	0.958334	8.95437	0.924282
							2.24139	-1.44071	18.8739	0.99063	8.19094	0.815745	15.2884	0.992471	12.4374	0.976384	17.9455	0.997758
							9.49666	0.979025	18.3556	0.975873	17.0745	0.993844	13.7521	0.958863	7.0325	0.973337	5.0278	0.663136
							20.4389	0.946507	13.983	0.988334	21.2139	0.989067	13.1658	0.971578	12.0718	0.918508	4.19219	0.0456866
							16.3735	0.951829	12.5408	0.995242	5.429	-1.30701	13.249	0.97224	18.8772	0.993355	0.96945	-0.227646
							14.8789	0.956517	0.611388	-0.00235134	9.05799	-4.17867	17.7964	-0.0585791	0.0257589	-0.387426	7.28393	0.951553
							21.0062	0.782876	16.6748	0.984086	14.5915	0.898376	11.6017	0.980754	1.54757	-0.103779	6.22421	0.819927
							22.2637	0.960118	16.173	0.924401	7.51444	0.953903	14.5605	0.973944	1.35214	-2.20715	8.64209	0.545256
							23.4779	0.910582	13.35	0.975767	19.2234	0.985732	14.3335	0.976584	9.47296	0.861568	7.22774	0.993281
							18.3175	0.957461	1.91295	-0.514482	19.1522	0.98289	18.1427	0.976972	3.17627	0.495194	7.86264	-0.402549
							19.1983	0.980019	12.9513	0.997578	2.17518	0.073743	1.86586	0.00606463	9.35361	0.938174	18.2982	0.931875
							11.5827	0.981582	13.6635	0.962645	19.1618	0.962178	3.16228	-12.6595	18.9905	0.863405	12.6063	0.844694
							11.0998	0.997213	16.0823	0.873684	20.8586	0.98358	15.9005	0.949443	11.2735	0.99393	8.58676	0.960776
							14.78	0.894995	18.6984	0.90549	9.43237	-0.961806	19.7845	0.988128	10.8977	0.879346	3.12017	-0.207558
							12.9877	0.61479	14.5639	0.987684	10.2709	0.918529	12.9639	0.936732	11.861	0.997973	17.2239	0.973783
							20.771	0.969327	13.7822	0.998754	17.0601	0.994076	13.7853	0.997371	12.5194	0.984955	5.25623	-0.249447
							16.5982	0.601057	15.6017	0.853503	22.801	0.973081	17.8468	0.953619	14.7369	0.958145	10.9947	-14.4513
							1.20936	0.638627	17.446	0.970033	15.5023	-15.0369	12.6601	0.672673	4.04811	0.975402	3.18904	-0.0656821
							9.81446	0.967269	12.6029	0.920261	22.3033	0.793935	7.75534	-1.88027	1.16053	-0.351257	6.4408	-0.991897
							14.2633	0.84345	13.373	0.962082	2.25714	0.0671602	8.90163	0.988933	6.49223	0.623263	4.10298	0.938809
							15.4925	0.991179	15.1417	0.958926	18.4821	0.986485	8.94203	0.964315	11.7747	0.996581	10.054	0.434541
							11.9845	0.992907	15.1699	0.975044	14.7254	0.895049	12.4484	0.762989	11.4546	0.993116	10.3468	0.941185
							2.82727	0.878168	14.0693	0.986142	21.5637	0.885256	17.4755	-0.0214718	9.78212	0.981313	12.8737	0.995147
							6.67423	0.864224	13.2787	0.990494	15.7491	0.990069	11.1381	0.962811	3.16228	0.385578	10.1563	0.99138
							4.05404	-1.45221	10.9305	0.997392	13.9496	0.974018	11.7922	0.964593	7.44899	0.913087	4.38594	0.739196
							15.2429	0.982172	1.369	-0.48516	10.1959	0.785317	14.2822	0.77435	16.7916	0.999438	11.0747	0.997796
							10.8976	0.843954	12.9278	0.973797	24.8492	0.72435	18.356	0.915684	11.1227	0.961962	9.07063	0.996317
							4.63571	-2.16761	21.3113	0.992865	15.624	0.951966	6.29331	0.484208	3.62104	-0.197589	12.894	0.952445
							20.6652	0.987533	16.1642	0.98311	12.4736	0.31347	13.3235	0.889443	12.0914	0.985687	6.98964	0.911984
							20.3409	0.940433	18.7731	0.976043	13.2517	0.747207	11.4412	0.995256	11.2806	0.999951	9.29126	-13.7918
							20.3799	0.884075	7.13435	0.565531	16.5243	0.981192	6.70488	0.979292	8.44729	0.729986	9.31059	0.980522
							21.3113	0.978797	16.7476	0.934398	18.5223	0.711369	11.5257	0.931843	8.52266	0.987787	3.5275	0.632714
							8.2599	0.851079	15.876	0.917458	24.8833	0.689546	4.65017	0.200419	15.1296	0.986885	10.2312	0.982803
							13.4646	0.965957	15.709	0.978452	26.0353	0.927117	13.2524	0.723125	11.596	0.997652	11.3122	0.980495
							11.9569	0.947757	12.9952	0.99432	20.2167	0.957011	12.8678	0.998148	3.15012	0.567455	7.8197	0.807631
							11.1233	0.992971	15.5892	0.972805	25.4351	0.932827	12.6056	0.556083	3.01953	0.920403	8.3922	0.984529
							3.2936	0.655556	15.0304	0.957045	14.0031	0.998763	8.93634	0.975298	33.6385	0.979709	5.58563	0.722738
							18.2443	0.981153	15.2736	0.936656	15.2267	0.944044	12.5717	0.997368	10.7549	0.935631	11.8546	0.95273
							21.1226	0.96678	14.5027	0.977912	8.79733	0.894226	12.8388	0.982663	10.1508	0.96663	3.62597	0.820576
							21.1935	0.964646	17.1549	0.914569	22.7822	0.736491	17.2249	0.856384	5.30184	0.988413	8.51719	0.995569
							28.7201	0.988063	14.7296	0.991158	16.8485	0.989809	7.69242	-5.50774	13.0637	0.944504	8.60079	0.892939
							13.1911	0.99781	16.5746	0.955395	15.8322	0.394672	9.41001	0.989117	12.9079	0.92201	9.40734	0.985517
							19.2485	0.989224	14.3344	0.992111	17.0881	0.942521	12.513	0.962181	14.1226	0.977641	12.8636	0.981388
							27.1443	0.913457	14.1066	0.995302	15.7892	0.971116	18.5483	0.992431	15.7916	0.991121	7.39845	-0.00972447
							0.000149048	-0.0142299	15.3775	0.952604	19.4625	0.990515	14.9475	0.734628	19.003	0.982526	4.77885	0.945141
							8.05689	0.940028	14.9705	0.987408	23.0039	0.944572	15.7025	0.990494	16.8087	0.856469	1.20732	0.0428257
							11.7874	0.994073	13.0823	0.883495	0.715473	-0.0744146	15.5751	0.997573	8.66875	-5.09352	13.717	0.986981
							11.3571	0.974905	16.7695	0.985849	15.7009	0.946006	12.1415	0.976005	7.11028	0.99188	2.25832	-0.666522
							15.0759	0.972818	12.1391	0.997135	11.3164	-4.12929	16.661	0.962492	6.88164	0.964211	8.26007	-0.916061
							6.06089	0.902036	15.642	0.970435	18.1677	0.976356	13.4122	0.911922	7.4661	0.980798	14.7702	0.994591
							14.2049	0.730528	15.7238	0.970864	28.5766	0.830133	16.1783	0.831757	10.8394	0.994407	4.28307	0.463548
							14.5022	0.996332	16.004	0.982742	8.96469	-0.3482	20.8386	0.974232	11.7274	0.901793	14.4457	0.971035
							8.32327	0.854257	15.1369	0.975268	15.1872	0.92877	8.93431	0.961	16.6819	0.982652	12.0079	0.97661
							11.486	0.914464	17.4887	0.989421	17.4716	0.972393	3.4691	0.843432	2.5782	0.141682	9.22818	0.833529
							14.0017	0.986242	8.21967	0.946071	14.737	0.979545	13.5348	0.993246	15.7565	0.989587	5.37942	0.95014
							11.643	0.995211	12.6667	0.981477	18.8484	0.972729	18.2436	0.945998	5.77215	0.759269	17.2362	0.656986
							10.151	0.906796	13.5105	0.992944	20.0051	0.987737	8.62266	0.943979	14.2839	0.991377	18.7483	0.995011
							3.9966	-0.83695	5.27768	0.958576	18.35	-0.246476	10.4391	0.990723	14.5	0.96269	9.44548	0.959312
							15.2777	0.938522	2.67616	0.952576	17.1806	0.906101	2.24954	-0.912877	13.7704	0.992931	12.8236	0.938355
							12.2805	0.31931	17.9104	0.916405	19.1996	0.987478	20.6131	0.955546	11.4272	0.981912	12.1324	0.839298
							9.97552	0.982132	17.7774	0.995752	23.1863	0.913182	16.6012	0.97393	11.5495	0.906557	6.48988	0.966718
							17.546	0.94348	0.781435	-0.171267	21.7891	0.979588	12.8539	0.752744	12.0911	0.998061	10.3924	0.707192
							11.9146	0.957574	16.1046	0.996778	16.8223	0.995345	0.00456026	-0.00912164	11.4304	0.954131	5.28416	-2.56505
							15.0499	0.914029	17.5166	0.425422	20.4866	0.450667	17.3984	0.982897	9.37795	0.793785	12.9486	0.987784
							2.51441	-0.0192577	17.9662	0.990471	29.3782	0.966092	11.667	0.977574	17.4396	0.982625	16.7026	0.96633
							12.7653	0.97898	9.98556	-0.933887	25.4088	0.96803	14.5827	0.995368	8.32957	0.951321	17.5662	0.998467
							2.48823	-0.160849	2.43785	-2.40256	24.124	0.85758	10.8887	0.954046	13.3304	0.993036	9.92479	0.979135
							14.2971	0.980263	15.8105	0.995823	20.0197	0.947789	22.2791	0.92485	14.0386	0.97365	8.1555	0.962568
							15.3642	0.785745	11.2881	0.9814	11.4874	0.997294			11.4315	0.856859	8.95654	0.896391
							11.5486	0.996354	17.5836	0.955518	17.5015	0.968165			11.7585	0.981052	0.000149014	-0.0214795
							18.5355	0.816371	16.4318	0.464331	26.1035	0.958997			10.674	0.997628	2.97387	0.83285
							7.35352	0.924629	13.6374	0.969299	19.1702	0.725027			11.0892	0.962143	9.50512	0.583575
							8.44746	0.986167	13.1116	0.996777	12.9232	0.999053			10.1056	0.990562	14.0163	0.988904
							12.4139	0.998218	13.5355	0.983488	18.7392	0.9639			8.25382	0.839872	8.35176	0.978242
							14.0554	0.900553	11.0354	0.974872	16.5203	0.993401			3.16228	-0.202501	13.6509	0.955576
							15.004	0.944106	11.043	0.975201	18.1825	0.781342			16.1952	0.997385	14.8459	0.922528
							10.7967	0.944449	2.20914	0.0237087	20.0826	0.85561			13.4704	0.987778	19.1139	0.476243
							9.88837	0.999284	16.7664	0.880753	14.9378	0.779863			10.7971	0.999523	5.76761	0.965953
							14.7144	0.973831	10.8482	0.988514	20.5667	0.914323			14.9801	0.987365	18.6356	0.916629
							15.267	0.939537	14.313	0.943436	18.7972	0.974442			6.36405	0.954336	0.00478655	-0.267972
							19.8622	0.994701	1.3648	-2.1196	20.4921	0.936144			11.1834	0.995611	3.04064	0.0867114
							18.0082	0.95927	18.295	0.987747	13.5396	0.985045			1.0849	-0.941683	9.09443	0.986962
							12.6078	0.987013	13.1886	0.85859	14.1571	0.98753			3.12515	0.842104	12.011	0.996489
							11.0104	0.832615	4.68276	-1.33378	23.5268	0.928107			9.14247	0.940732	13.0048	-1.48108
							14.8725	0.981591	10.9939	0.994015	18.2642	0.978224			5.92169	0.986583	6.74118	0.846213
							18.0383	0.850266	18.4877	0.997146	17.8109	0.879908			9.32753	0.736627	10.7339	0.938076
							8.3166	0.96127	8.88528	0.999097	0.00299918	-0.0170515			9.08944	0.988815	7.45666	0.383151
							18.9678	0.99316	15.4169	0.990756	19.534	0.611581			0.663146	-0.189367	8.04506	0.820076
							9.90238	0.836059	21.0805	0.993423	17.2259	0.985436			2.35821	0.625459	1.12374	-0.0339884
							11.3945	0.977381	12.2032	0.94382	29.665	0.975802			4.47481	0.911407	15.9151	0.979697
							16.1297	0.969704	18.8359	0.989476	6.12753	-2.04661			1.39463	-0.267347	16.0649	0.996429
							10.7314	0.995955	16.7847	0.990769	22.4361	0.988957			5.16333	0.896445	7.94445	0.910077
							13.7756	0.993852	13.1958	0.976577	20.4805	0.954716			22.615	0.898287	2.47011	0.365825
							1.65445	0.896554	10.3997	0.481918	19.7104	0.966836			11.8618	0.989354	2.16094	-0.410625
							10.3573	0.888569	13.7201	0.927724	12.4173	0.848715			5.75926	0.553169	6.07476	0.421406
							12.156	0.940826	10.0233	0.974291	14.0845	0.887878			12.4976	0.999395	10.2155	0.853907
							7.36596	0.99483	13.0547	0.990441	16.3235	0.997592			7.90751	0.96144	15.0461	0.891034
							15.3027	0.99792	12.3438	0.743297	4.69227	-0.256686			3.73209	-1.90343	4.60389	0.6848
							14.0847	0.909315	15.0821	0.987971	7.38649	0.748849			4.00259	0.978247	15.2916	0.997864
							17.7831	0.993986	15.6768	0.998132	10.5234	-7.53433			6.0436	0.938518	9.46552	0.985779
							1.40457	-0.29137	15.5038	0.978571	19.8488	0.984953			7.70474	0.993644	9.8177	0.70335
							1.77616	0.19944	15.5391	0.980496	9.41232	0.978863			15.3018	0.917237	2.62332	0.807532
							11.4605	0.999565	14.8461	0.957008	5.38191	0.465592			7.20418	0.967704	10.7714	0.980529
							13.4924	0.979372	1.0366	-0.23496	5.56396	-2.73855			14.5277	0.997895	11.9087	0.986616
							14.1963	0.948486	14.0292	0.965442	18.2944	0.951159			3.70822	0.790156	0.000149454	-0.00658483
							10.7811	0.920518	14.8395	0.988607	16.0583	0.978549			0.00183717	-0.00173873	14.0602	0.993234
							10.7747	0.981578	14.3668	0.987314	15.4129	0.912476			18.0471	0.978344	5.91426	0.76964
							9.64291	0.94777	10.3663	0.984545	1.8439	0.318453			12.3279	0.992271	14.1558	0.908507
							17.8891	0.970169	15.2392	0.994602	23.0675	0.917441			4.14217	-0.0772061	7.44169	-0.0624089
							21.1181	0.951251	14.9791	0.977471	13.3709	0.989518			2.95094	0.834837	0.000149018	-0.01739
							11.6048	0.920406	16.1629	0.990107	9.5234	0.990079			12.0308	0.915815	0.00014935	-0.00694963
							19.5802	0.983655	15.816	0.988409	6.23742	-1.91254			16.1393	0.94961	13.0654	0.978156
							4.06491	0.977922	11.1847	0.994146	13.8766	0.664811			9.90025	0.9966	15.8742	0.931828
							13.1385	0.995699	14.7976	0.986787	15.7203	0.118284			12.1435	0.987702	7.92783	0.772958
							8.7279	0.227898	15.2004	0.995866	10.4413	0.6892			7.02896	0.696238	7.57604	0.9903
							10.8618	0.776985	13.163	0.996796	16.4378	0.884055			8.22652	0.961841	8.23819	-3.82778
							14.9301	0.985659	7.9529	0.982365	16.0349	0.904859			11.468	0.944466	23.4341	0.99494
							14.5872	0.980507	14.5678	0.996794	16.4436	0.889132			15.0945	0.980459	16.8828	0.99572
							16.7409	0.943839	12.7021	0.999196	21.1333	0.963549			11.2571	0.812622	7.5598	0.891982
							17.4624	0.895922	8.78328	0.969772	16.3054	0.890833			15.0918	0.997027	11.6446	0.985015
							13.903	0.986705	16.7577	0.987137	19.2168	0.98892			9.38842	0.92514	11.2355	0.967818
							2.31993	0.87819	10.419	0.988872	1.91114	0.44843			9.96218	0.999777	9.12725	0.845062
							19.9858	0.970757	13.3659	0.966405	14.2521	0.658909			6.43362	0.859052	2.51526	0.331015
							23.5367	0.39865	17.2768	0.978919	1.26642	-0.477179			10.1254	0.983181	31.5955	-7.3597
							10.7938	0.969264	22.0055	0.978464	12.3563	0.953951			8.83602	0.940761	11.3184	0.949618
							6.05323	0.932024	16.2132	0.898344	15.179	0.966949			12.0693	0.883747	11.3898	0.995254
							15.8393	0.988692	15.7757	0.957025	12.0047	0.775541			5.71883	0.0211762	13.1116	0.960275
							13.9441	0.838824	19.11	0.98743	19.079	0.986266			3.84808	0.781434	3.8298	0.935396
							8.12934	0.766548	15.5226	0.987788	11.4105	0.992104			11.484	0.517861	10.0216	0.982626
							20.6656	0.991454	15.3034	0.839313	3.14808	0.712573			11.5748	0.95231	10.9193	0.979805
							11.5515	0.93885	11.2584	0.943647	8.26718	-0.534704			3.86217	0.300101	13.259	0.735996
							19.41	0.872457	13.2347	0.991446	20.6966	0.907631			2.21562	0.924547	8.02517	0.840167
							18.1125	0.846834	21.7656	0.949512	16.5488	0.978794			9.95952	0.9631	0.253751	-0.010331
							5.62589	-2.41435	13.682	0.987311	18.3244	0.932934			7.40614	0.719955	10.3481	0.987403
							12.8694	0.338433	12.4214	0.994614	18.0499	0.993025			9.37591	0.976198	4.42475	0.98823
							17.1882	0.950565	16.8954	0.978704	12.8002	0.982428			3.06213	0.975833	15.8317	0.997563
							17.1197	0.986277	15.2406	0.996562	14.3012	0.991579			16.1527	0.968332	10.7863	0.981666
							15.4001	0.958721	16.2227	0.975923	13.3516	0.625338			19.0817	0.964041	6.65402	0.932445
							12.946	0.998326	14.2208	0.984187	9.07344	0.936122			11.6017	0.934574	13.1855	0.936442
							19.3502	0.993325	16.629	0.984064	14.6623	0.756299			14.2681	0.906149	4.55147	0.501032
							19.4323	0.856885	13.8659	0.999105	20.3141	0.81289			12.1087	0.988753	11.6579	0.986175
							21.1902	0.938941	17.5609	0.997332	19.7643	0.900991			13.2623	0.999641	6.05312	0.355572
							20.5859	0.99108	16.3209	0.994521	2.2787	-0.318968			6.30276	0.931103	8.77109	0.984386
							8.84857	0.972587	15.0088	0.962962	5.18889	-0.326178			3.62565	0.564531	14.5821	0.998235
							14.7879	0.995788	13.9997	0.99662	23.2954	0.673954			2.60506	-0.028377	8.42437	0.690049
							11.1544	0.591738	10.7738	0.997876	13.3201	0.952467			12.502	0.998683	14.4762	0.988758
							21.543	0.987508	22.27	0.995864	7.6875	-2.0321			6.32197	0.977028	11.33	0.411123
							17.0299	0.921302	17.0475	0.99927	22.3138	0.971761			18.7149	0.850704	6.82895	0.948421
							14.1741	0.995744	16.2825	0.970778	17.7091	0.966983			9.40327	0.980243	7.9525	0.929994
							19.7601	0.977928	13.7886	0.982328	21.1094	0.975148			4.64913	0.917639	10.012	0.921541
							16.2782	0.98138	17.0332	0.927989	7.59554	0.754024			5.17812	0.975354	13.4044	0.673933
							10.1272	0.899139	13.941	0.99446	17.6177	0.844841			9.34299	0.495544	9.96985	0.986418
							17.5267	0.985079	14.4449	0.989789	12.6267	0.982923			17.5106	0.993132	10.095	0.774886
							18.039	0.86861	11.2267	0.99324	3.47193	-0.456545			0.00441884	-0.128682	14.3081	0.931801
							12.5451	0.994622	19.2409	0.973208	10.861	0.993119			8.29949	0.901818	0.000859699	-0.000149588
							11.6766	0.987358	13.2975	0.99436	18.2368	0.687977			9.69129	0.988712	11.6997	0.994072
							9.00682	0.968029	12.3509	0.997004	7.38537	0.653366			16.2992	0.99127	8.08802	0.919631
							20.7852	0.969211	24.8257	0.933773	13.7144	-0.102336			0.7133	-0.0660444	13.9156	-9.38412
							13.4436	0.995462	17.8054	0.990633	16.4969	0.994481			6.73191	0.98954	14.5136	0.986803
							6.06108	-3.65439	14.6862	0.997229	14.7349	0.531804			8.53385	0.955652	15.8749	0.996496
							12.3836	0.907814	18.1357	0.985051	10.1638	-0.143741			9.66323	0.689473	12.9103	0.962133
							8.41313	0.795289	13.4753	0.977037	18.4996	0.940907			4.92733	0.601443	11.9824	0.975256
							21.0382	0.995841	8.69348	0.843858	7.63087	-11.9178			12.8808	0.995279	7.60274	0.934464
							17.9743	0.943866	8.03051	0.984519	8.43097	-2.17366			14.1243	0.989788	6.36046	0.765064
							19.0594	0.996436	13.6915	0.967473	10.8397	0.974113			6.68135	0.480187	10.077	0.990257
							13.494	0.427154	13.7013	0.985182	15.2495	0.9938			2.45977	0.160232	12.1467	0.998715
							4.29429	-1.76517	2.52283	-1.33493	16.1406	0.932828			12.1454	0.942769	22.9003	0.114584
							14.7079	0.922638	17.6496	0.996789	0.0350417	-0.605099			17.0702	0.958595	10.9807	0.997342
							17.4974	0.935412	8.60631	0.998675	0.00493377	-0.00380115			9.25433	0.778235	12.2203	0.945985
							17.5113	0.989159	18.4273	0.990115	13.9315	0.978504			4.31365	0.961517	10.4658	0.985379
							11.2832	0.999305	17.6422	0.82684	22.7033	0.884655			9.25127	0.919937	10.2079	0.898394
							13.9299	0.904091	16.1597	0.976547	12.26	0.812426			11.6223	0.976416	13.9364	0.930611
							6.53105	0.831631	15.9949	0.998023	16.4532	0.944389			6.48215	0.895916	10.4465	0.79267
							18.3371	0.944962	18.8284	0.978667	9.50921	0.534816			9.10402	-0.0195489	6.89009	0.997801
							26.105	0.869611	15.9526	0.983295	15.4823	0.933247			10.9953	0.980471	13.3477	0.984085
							17.0793	0.974649	12.6481	0.983529	11.4775	0.965158			13.043	0.992521	11.9084	0.985312
							23.3017	0.976137	14.5853	0.990036	0.942806	-0.0304096			16.1997	0.852723	2.59407	0.129184
							19.0961	0.821336	9.59284	0.997804	6.79048	-7.11535			13.1267	0.716976	12.3974	0.944174
							18.0138	0.978443	13.0055	0.989849	9.1357	0.909696			11.8796	0.997329	14.0972	0.983606
							14.6499	0.994571	12.3491	0.994839	18.9456	0.966037			10.1408	0.819503	9.06906	0.931219
							20.938	0.969172	13.4577	0.975291	26.0033	0.577985			8.59895	0.978183	18.5061	0.846982
							2.68188	0.821884	2.28465	-897.332	9.9038	-0.797136			5.4039	0.971311	13.1407	0.981992
							14.5282	0.98416	12.7623	0.965428	17.4883	0.999226			8.74544	0.949509	7.23984	0.965621
							18.7656	0.987159	17.5869	0.8325	4.60071	0.589238			6.93161	0.537052	10.2362	0.948767
							9.76497	0.994102	15.8299	0.994701	13.4469	0.955697			0.00372196	-0.173021	8.7671	-7.26406
							11.4388	0.99507	15.171	0.99849	4.54318	0.479411			11.4261	-0.099845	9.98962	0.990517
							17.0347	0.9613	11.7363	0.95711	18.618	0.991407			18.8001	0.748834	14.4927	0.867115
							2.45534	-1.02809	13.077	0.996174	9.67185	0.953312			15.2676	0.998188	10.4502	0.945899
							14.719	0.971563	15.6755	0.998254	30.2007	0.953131			6.83196	0.971147	8.48889	0.942869
							17.7909	0.897286	12.8441	0.92146	8.76107	0.430766			7.28425	0.991839	1.0739	-0.348216
							14.5117	0.986417	14.4812	0.99699	8.4045	0.886143			6.03635	0.919963	8.6508	0.973356
							7.75233	0.0835839	1.55863	-0.460729	15.9706	0.998867			16.436	0.779087	13.7491	0.844898
							8.56288	0.744731	13.2534	0.999403	8.94612	0.900404			7.86966	0.984898	14.7886	0.977856
							12.4242	0.948039	15.4374	0.992294	25.0325	0.951577			14.5588	0.31894	15.0054	0.995858
							12.8424	0.996241	11.8053	0.895078	21.2928	0.988821			19.5226	0.990133	12.4283	0.959872
							15.8849	0.937466	13.7331	0.999763	3.17205	-1.85096			0.0925124	-0.574828	4.97589	0.950979
							21.537	0.798106	16.2233	0.997153	19.0555	0.613327			11.3698	0.968767	10.0959	0.972873
							32.0985	0.979091	13.6448	0.996944	8.63641	0.753565			7.60371	0.529082	6.69806	0.834065
							17.4981	0.966686	12.9152	0.986482	14.8936	-0.653185			11.9379	0.910379	10.66	0.968807
							14.8468	0.928499	13.9948	0.997138	13.2006	0.966941			16.1815	0.928238	11.2265	0.986968
							19.2271	0.969185	13.9792	0.980732	1.41582	-0.0846417			10.2803	0.994536	8.55339	0.799479
							23.8844	0.984155	18.5637	0.984245	11.4479	0.877942			10.5267	0.963952	12.2852	0.983548
							18.2606	0.880463	13.0228	0.971462	11.8364	0.118289			15.7844	0.982941	0.00665009	-0.00246559
							8.16773	-4.41134	7.78611	0.993165	22.4588	0.990791			12.5013	0.980499	8.11724	0.796201
							5.42058	-3.97157	17.4204	0.934371	15.8749	0.937455			1.85222	0.092313	14.7831	0.817743
							18.2345	0.982949	14.6829	0.98411	17.9273	0.982777			10.7847	0.98288	14.214	0.80806
							19.0496	0.980008	12.2181	0.990243	1.32953	-0.0535526			8.0637	0.962185	9.68091	0.953703
							16.779	0.980156	15.2648	0.935494	10.7043	0.163016			11.314	0.99206	5.9705	0.944236
							23.2331	0.93223	15.0583	0.995884	7.66276	0.681058			13.3274	0.989156	14.6739	0.981658
							17.0082	0.919876	14.6291	0.993681	5.40024	0.720002			0.968667	-0.211344	9.50902	0.980897
							17.9582	0.979364	15.9327	0.995468	16.4729	0.959207			9.37731	0.998845	15.4132	0.955275
							24.309	0.920274	17.221	0.991721	19.09	0.877453			8.28729	0.978622	6.87943	0.970633
							14.7526	0.995786	4.92815	0.829859	14.6125	0.922415			5.61339	0.558337	2.88872	-0.334871
							15.179	0.962913	9.48854	0.404767	14.1816	0.953119			15.1546	0.931486	10.8387	0.876146
							20.396	0.992453	8.46599	0.98532	21.8776	0.969922			12.6566	0.992075	12.6622	0.993341
							14.2401	0.990298	16.6657	0.991579	11.4592	0.717077			7.25683	0.989881	13.1308	0.999425
							15.7569	0.920313	12.7488	0.997957	10.7566	0.393317			6.59885	0.760999	3.61698	0.220029
							18.1718	0.969435	14.3648	0.97424	19.6178	0.986026			8.86056	0.984084	11.8521	0.696461
							14.9724	0.783234	5.46266	0.986635	0.751763	-0.532397			3.00317	0.162095	10.7982	0.925669
							18.145	0.775913	13.1529	0.972447	20.6184	0.955224			12.5024	0.999268	15.2956	0.998051
							18.1672	0.864087	17.3415	0.95666	6.67551	-0.75451			9.94791	0.988609	12.9262	0.996324
							3.89999	-2.27093	14.4581	0.93889	18.1544	0.961703			15.9486	0.996857	5.66125	0.986361
							18.6558	0.978196	9.55886	0.705049	31.5019	0.863334			14.0444	0.817531	0.000149302	-0.00465421
							3.16228	-6.85599	10.4482	0.993498	21.7905	0.986559			12.4162	0.840922	5.34418	-0.198017
							18.9385	0.974519	14.656	0.995021	19.3994	0.870608			11.1793	0.953817	9.95804	0.846767
							7.51327	0.367932	15.1062	0.818869	17.8306	0.70046			4.15217	0.659548	12.7497	0.880792
							6.22733	-0.297288	12.1517	0.951069	23.1642	0.92738			11.81	0.990454	0.000150949	-0.0103986
							10.7131	0.555504	12.363	0.99337	25.431	0.981415			9.73992	0.961694	15.0948	0.980089
							15.8412	0.979522	17.6564	0.969799	19.5282	0.995189			11.0227	0.994817	13.972	0.97251
							18.0972	0.946849	11.9489	0.301241	5.60563	0.991406			7.31635	-14.7506	3.40261	-0.602779
							17.9964	0.871507	13.2842	0.222987	27.2197	0.986			14.4298	0.990118	10.3501	0.934872
							18.2814	0.922851	8.47308	0.715982	21.4866	0.787786			7.66837	0.805592	14.4795	0.868893
							22.8325	0.91739	8.89817	-15.7403	16.0885	0.966088			12.9184	0.998094	12.6372	0.95223
							10.4782	0.885976	15.9225	0.99472	13.9175	0.97604			10.3114	0.960114	21.9683	0.87247
							23.3839	0.987267	15.3338	0.988309	11.735	-0.407317			10.4243	0.670834	17.236	0.992595
							13.7145	0.930374	16.0732	0.950142	23.173	0.950453			5.00237	0.686776	12.8463	0.731584
							19.7074	0.937778	12.7047	0.937766	14.3489	-0.954653			10.9779	0.976287	6.96803	0.948598
							13.1498	0.999049	16.262	0.965226	9.04752	0.98418			8.58954	0.180709	12.2513	0.998457
							4.77222	0.151287	9.41466	0.949223	26.3124	0.990189			15.5346	0.998023	10.3293	0.750235
							18.1429	0.962793	0.00265247	-0.0974385	18.8779	0.964807			10.325	0.912034	10.1076	0.988832
							10.1422	0.906731	18.7519	0.988486	16.8684	0.800772			19.9284	0.787406	7.87355	0.636942
							18.8975	0.996871	12.9494	0.745829	19.6478	0.97246			17.6124	0.999331	11.7871	0.996768
							18.708	0.953447	11.4911	0.998022	15.142	0.930218			17.374	0.987982	17.9728	0.950105
							21.2704	0.98181	15.9656	0.995799	9.86623	-2.13637			15.2198	0.972615	13.4678	0.986094
							6.51504	-3.10694	9.04293	0.996696	20.4663	0.892759			18.6936	0.992637	3.86359	0.862982
							25.8092	0.944356	14.6796	0.993177	18.7691	0.984454			7.03778	0.996387	10.7269	0.973534
							22.017	0.965621	5.79804	0.994835	12.9887	0.737796			8.05722	0.988764	6.41787	0.392647
							14.6675	0.986923	13.2018	0.996624	15.9228	0.964297			7.47088	0.42229	4.1888	0.936864
							14.2064	0.976748	10.845	0.365206	18.2252	0.981741			19.7153	0.981584	12.6786	0.98315
							21.4312	0.961407	12.8048	0.996871	18.2712	0.990388			6.74418	0.965925	10.432	0.990159
							15.6654	0.942936	5.55486	-0.0310316	20.5326	0.994499			7.92643	0.998724	15.1192	0.978112
							17.065	0.985238	8.14199	0.982358	5.45842	-2.29973			11.8367	0.622708	21.0309	0.953032
							8.04871	0.964396	15.6449	0.98482	13.7898	-0.0190204			19.1447	0.962198	4.01461	0.306618
							18.5266	0.982785	10.3949	0.934737	21.8303	0.962671			13.145	0.980027	12.5027	0.980165
							15.2924	0.927406	17.4538	0.99861	16.5442	0.980941			13.8927	0.998418	12.6373	0.986364
							19.6079	0.987295	10.4574	0.556091	27.2206	0.985243			12.7519	0.961436	16.6422	0.9641
							16.6089	0.788106	13.0529	0.961044	17.3159	0.953244			19.9449	0.990717	11.9578	0.999237
							20.3599	0.869366	13.8506	0.984687	11.2397	0.997398			17.4093	0.99362	17.3716	0.993292
							16.0043	0.439595	11.7426	0.94194	19.0855	0.958173			15.6886	0.910578	8.89716	0.980024
							13.1792	0.985376	11.9964	0.983618	22.1687	0.980801			9.46322	0.974024	12.1283	0.997066
							21.8854	0.977085	10.282	0.708718	7.7638	-9.75163			14.6671	0.960815	5.4533	0.777498
							19.0285	0.996059	18.7883	0.976721	19.0293	0.989665			7.68338	-10.07	15.8135	0.953008
							12.0503	0.973174	15.5208	0.989404	3.34873	0.336146			11.3931	0.993531	12.1846	0.990076
							16.2234	0.905085	6.16114	0.913207	15.1749	0.903299			15.1987	0.998015	11.8795	0.968053
							14.4142	0.991575	0.00540682	-0.0927875	7.51945	-0.698932			18.066	0.962892	13.9066	0.978322
							26.0871	0.914777	11.954	0.555529	23.8022	0.984161			11.529	0.543534	17.4513	0.976688
							19.9806	0.972062	10.0648	0.994583	11.0469	-13.4569			8.02967	0.929945	14.8092	0.997245
							24.656	0.991088	14.0411	0.98059	20.3329	0.966404			8.06403	-1.1238	13.7531	0.995896
							22.0758	0.990945	14.029	0.993911	22.9275	0.935704			3.3785	0.330331	16.5477	0.998295
							7.47937	0.992912	20.9076	0.952515	13.7832	0.822488			19.1561	0.981392	9.29896	0.975257
							15.6367	0.996343	16.3601	0.830029	14.0204	0.67262			12.7721	0.985832	16.5859	0.993357
							18.1816	0.954049	11.4856	0.994197	12.6473	0.632581			7.08226	0.991815	16.8251	0.997881
							15.7004	0.98709	14.0583	0.880916	18.9978	0.989503			14.8396	0.95269	10.0498	0.982394
							18.7379	0.970617	14.8395	0.917424	19.3348	0.994438			16.9961	0.995506	11.4862	0.872804
							8.46968	0.902755	11.0848	0.973346	27.7169	0.905036			8.4758	0.894986	10.9197	0.977883
							23.803	0.99071			16.412	0.952973			0.241515	-0.0173196	19.454	0.980012
							14.9893	0.980827			16.8739	0.996002			9.56945	0.983227	6.6219	0.887177
							13.0779	0.236148			15.6201	0.97864			9.14141	0.995422	18.3094	0.985291
							20.4095	0.984742			14.0784	0.836289			0.000149044	-0.0164203	13.1137	0.99783
							15.3637	0.898543			18.5832	0.736825			18.829	0.907697
							1.41078	-0.454492			26.5048	0.832415			5.72019	0.986868
							11.0859	0.858105			22.5247	0.961311			10.5306	0.934662
							11.5098	0.990641			15.7885	0.956207			11.1497	0.872964
							21.616	0.98675			21.0157	0.88321			13.4448	0.815105
							9.39106	0.982695			9.64069	0.965733			2.88186	0.463238
							23.2407	0.964555			23.6306	0.987542			19.197	0.988041
							14.8442	0.984602			21.7656	0.9945			7.82368	0.810281
							7.91254	0.369275			18.8349	0.727427			9.83563	0.963219
							19.2339	0.930194			17.5303	0.997728			1.56793	-0.503159
							1.13998	-0.070418			19.4385	0.564435			7.4373	0.989495
							17.6295	0.81696			13.4258	0.996712			12.6579	0.683891
							4.51714	-3.33758			18.8777	0.990828			5.00475	-4.47952
							18.2912	0.991766			17.6691	0.575675			6.84897	0.94535
							24.9247	0.983012			8.37249	0.974991			10.0946	0.917618
							23.5829	0.983123			18.3114	0.340894			13.2472	0.994065
							21.8966	0.941237			25.7261	0.975281			14.7248	0.978936
							23.8426	0.936859			15.3194	0.864141			14.0074	0.969426
							15.4124	0.557209			12.4831	0.87124			7.0858	0.941146
							6.33063	0.921851			21.1615	0.929887			15.1924	0.952271
							19.8695	0.96328			13.2397	0.831637			6.92166	-1.22678
							16.0174	0.866175			15.9364	0.998167			2.44127	-3.2686
							15.8748	0.838788			19.8712	0.525951			14.3879	0.882773
							20.6665	0.9706			22.9506	0.992845			6.38512	0.721367
							17.2786	0.995824			18.1887	0.905877			17.61	0.970914
							23.249	0.960488			17.2797	0.936538			9.15691	0.460845
							5.15964	-2.2788			24.2062	0.989025			0.000149469	-0.0332682
							19.6016	0.96968			19.071	0.884366			15.1118	0.890686
							16.8177	0.991008			17.1361	0.779479			10.7173	0.87716
							22.6695	0.957931			15.3805	0.944555			5.7354	0.995884
							14.4938	0.98253			16.6136	0.998716			2.34273	0.947191
							27.2434	0.991557			8.4682	0.345228			16.639	0.993144
							12.1684	-0.735185			8.31791	0.73755			0.977892	-0.332756
							1.3507	0.767072			22.6813	0.977681			19.5734	0.853376
							11.915	0.990496			20.1049	0.942143			4.36317	0.61454
							20.4987	0.990753			17.0592	0.982295			14.8821	0.989082
							15.2652	0.93922			22.0231	0.983161			16.7835	0.997871
							21.9405	0.852393			13.1856	0.998318			11.1049	0.793453
							2.30473	-0.903215			6.27515	0.730709			15.5531	0.985512
							21.4351	0.990547			19.7123	0.972987			20.9375	0.98686
							15.9972	0.996052			16.0554	0.981916			12.533	0.996208
							4.13719	-1.63436			18.4188	0.986795			16.2317	0.987733
							22.2159	0.968778			10.9571	0.835641			8.59964	0.988951
							22.056	0.972974			6.45594	-2.04969			14.0263	0.605233
							13.5666	0.584313			12.722	0.89985			5.34827	0.854352
							13.8127	0.988246			11.5243	0.977236			13.8227	0.999216
							18.756	0.917018			11.4581	0.958886			12.2146	0.882176
							17.5552	0.973164			11.4681	0.940545			20.1063	0.879313
							18.7024	0.943194			2.59625	-6.58642			4.34314	0.458672
							18.1151	0.996658			3.64181	0.935381			16.064	0.939687
							25.288	0.965833			18.3942	0.979813			14.9767	0.995907
							13.3104	0.9704			3.81492	0.970364			14.0339	0.932761
							18.991	0.987664			13.3397	0.98799			8.35179	0.9456
							16.6083	0.733394			20.7619	0.991197			15.5708	0.976833
							19.1406	0.990142			20.2094	0.951406			10.9093	0.995142
							2.2033	-0.515516			16.9233	0.361198			12.7638	0.966275
							14.817	0.970421			22.3313	0.981623			13.5791	0.977955
							14.1467	0.989081			14.1004	0.927185			1.01686	-0.193223
							18.7625	0.986145			15.9837	0.95225			13.9134	0.939551
							21.8538	0.970311			19.6536	0.997063			7.62947	0.604402
							22.2558	0.934954			22.8618	0.99159			14.0651	0.992571
							16.2671	0.941639			17.6183	0.823521			15.1134	0.996996
							20.1077	0.9699			23.5793	0.970405			6.47603	0.816231
							11.8809	0.995406			11.0207	0.885095			13.1762	0.960522
							7.50878	0.764255			23.6385	0.912067			11.0027	0.765884
							18.6958	0.958735			26.3295	0.956364			19.687	0.979603
							3.16228	0.846966			22.2606	0.690506			9.47117	0.993693
							19.1279	0.938699			18.9075	0.957158			12.1281	0.971577
							16.5837	0.993314			13.5466	0.864639			7.6568	0.03563
							23.1027	0.976248			0.273245	-0.513856			18.0142	0.998603
							16.9441	0.992912			29.2026	0.788293			12.0813	0.941708
							23.8588	0.961103			24.6041	0.829544			14.586	0.740963
							24.3223	0.970927			14.5046	0.854877			14.9529	0.9942
							1.09832	-0.476316			15.501	0.975119			11.1959	0.992166
							22.1062	0.973476			19.519	0.984327			5.97491	0.970563
							23.2587	0.649542			20.6781	0.987218			19.803	0.935425
							16.614	-4.31964			17.4744	0.951297			17.8321	0.99527
							20.5708	0.92888			1.24381	-0.0739473			3.25711	-1.07302
							18.2596	0.991025			16.6821	0.94332			16.8656	0.996992
							23.4429	0.932775			18.8022	0.955089			10.6143	0.972593
							23.7274	0.971139			18.4054	0.938749			10.8115	0.888628
							20.5463	0.994459			28.7222	0.972762			8.45873	0.962855
							20.5708	0.941933			20.7318	0.215876			10.2999	0.803897
							1.24726	0.357834			23.809	0.863702			10.2878	0.906204
							21.283	0.933209			1.66351	-0.412817			12.2123	0.906531
							20.4702	0.971922			19.3691	0.991675			9.47838	0.992619
							20.053	0.957443			24.8892	0.911238			10.0105	0.853524
							9.01894	0.345761			18.8231	0.925047			10.1267	0.927744
							27.7094	0.974541			20.4017	0.993062			13.569	0.996965
							15.4047	0.940764			18.1367	0.99379			6.48152	0.992171
							16.0268	0.987813			19.847	0.992679			3.89927	0.846917
							26.8286	0.936101			23.3257	0.871466			0.917301	-3.06494
							21.2732	0.995093			20.7059	0.939548			5.48833	0.806962
							20.9636	0.98207			13.5812	0.796375			5.18902	-1.17957
							19.4696	0.980015			18.33	0.973594			5.41071	0.992654
							13.4512	-0.370821			13.2001	0.301406			0.00280231	-0.0461826
							14.1322	0.665204			22.8071	0.988281			11.753	0.999177
							17.4893	0.994921			2.35347	-5.05066			29.2981	-128.362
							2.01986	-0.153591			20.2639	0.986846			8.15078	-3.94929
							12.9512	0.987838			11.2947	0.758689			11.9881	0.978764
							6.58592	-9.48619			21.6984	0.977268			8.04902	0.991369
							3.62041	0.177925			15.7711	0.990852			15.3208	0.995399
							16.4482	0.987599			14.7824	0.407439			6.62383	0.976731
							19.2245	0.993041			18.0118	0.995433			0.526253	-0.0661172
							19.204	0.99018			18.8903	0.88498			9.66722	0.980051
							20.236	0.98138			19.3084	0.991166			11.6127	0.934954
							20.0099	0.63412			9.44887	0.929635			11.6472	0.746603
							19.9154	0.990403			10.614	0.998438			8.19451	0.944562
							15.4155	0.977373			11.7155	-0.807272			20.15	0.881238
							12.944	0.997402			14.426	0.8106			7.72273	0.976218
							20.6182	0.898521			16.3848	0.620594			3.2279	0.935905
							11.2902	0.912172			25.839	0.924351			1.66223	-0.331748
							12.9499	0.960286			23.2104	0.971581			9.82027	0.973063
							9.79066	0.961884			8.85754	0.0489445			11.3392	0.460906
							17.5003	0.98596			0.0016254	-0.000943186			8.95019	0.891737
							20.3917	0.861798			21.6368	0.558341			0.00145617	-0.000645607
							13.233	0.844574			15.6556	0.950282			11.5986	0.989753
							16.3746	0.999366			21.9294	0.979884			9.16175	0.973691
							23.2751	0.993881			18.2446	0.871484			16.7162	0.993111
							27.511	0.956029			16.9631	0.907745			10.8816	0.951668
							27.8946	0.946552			16.0717	0.259413			3.55397	0.175916
							21.5119	0.987158			20.5131	0.995157			14.1974	0.859829
							15.5406	0.990537			0.158114	-0.584008			9.82258	0.995125
							11.2794	0.944299			21.8638	0.92191			11.7233	0.988451
							21.3304	0.995233			15.8876	0.961693			4.01054	0.748753
							15.4195	0.984612			20.3282	0.984078			10.8889	0.776316
							20.0481	0.986163			17.9483	0.843979			10.4145	0.931562
							14.9653	0.843095			5.3532	0.389539			4.10727	0.558278
							18.4328	0.961521			21.2906	0.944264			16.4139	0.752223
							21.0914	0.93133			21.4719	0.937176			11.1678	0.988418
							14.6631	0.997118			16.6193	0.985566			14.655	0.993736
							13.1199	0.981043			22.6776	0.99454			7.15814	0.981391
							19.2885	0.93135			18.8524	0.933299			7.81916	0.867596
							19.0851	0.947876			19.5578	0.838495			16.2493	0.965142
							17.7965	0.990203			13.2864	0.666639			7.35793	0.998333
							12.8711	0.983501			22.839	0.974347			8.98142	0.781749
							22.0397	0.667985			25.9617	0.976136			12.8867	0.983142
							17.2325	0.886403			22.8133	0.993919			10.3171	0.994748
							23.5702	0.910838			19.156	0.997522			13.9881	0.989539
							22.9612	0.95192			24.9127	0.95461			5.75855	0.0949735
							15.9926	0.843164			16.4472	0.771747			3.64421	0.215328
							18.5712	0.909591			15.8415	0.995968			12.7749	0.997275
							17.9313	0.98078			18.5098	0.98983			11.5125	0.915848
							16.5938	0.995769			18.6552	0.996467			10.3438	0.965692
							14.3493	0.860109			21.9842	0.930086			9.41644	0.971798
							19.7496	0.887558			17.7135	0.970555			15.964	0.943604
							18.4739	0.913482			16.4042	0.918163			8.5399	0.99435
							18.952	0.944812			1.77416	-1.73653			10.6756	0.9843
							17.8963	0.988784			9.71894	0.917456			13.4137	0.637878
							23.1934	0.935349			23.519	0.895357			9.54645	0.992608
							11.2492	0.994444			10.7403	0.486357			5.03656	0.996229
							1.31376	-2.75015			18.1678	0.863706			12.4388	0.986559
							16.7754	0.975118			20.0425	0.633517			2.74298	0.864508
							14.2541	0.875274			19.7577	0.971842			15.8947	0.998751
							19.3193	0.955249			18.0742	0.554947			20.8314	0.97334
							7.07986	0.964014			16.3391	0.965332			9.44715	0.995089
							19.1759	0.930976			15.8501	0.986109			8.85705	0.992806
							23.2595	0.98854			14.6912	0.91531			14.1304	0.968962
							19.784	0.956703			19.5185	0.997277			6.93031	0.998569
							21.4627	0.763946			16.9377	0.988766			11.122	0.994254
							7.08591	0.914108			17.1589	0.877388			12.5876	0.986239
							5.72989	0.972531			22.0473	0.990933			14.2699	0.950122
							17.5235	0.561278			21.199	0.970301			9.5102	0.973295
							15.3053	0.794006			24.4347	0.915706			4.77653	0.932206
							16.3509	0.9752			17.8471	0.89119			10.4575	-0.457752
							4.82163	0.142022			15.9141	0.990703			6.60212	0.651102
							12.4397	0.949321			16.2736	0.914138			10.8031	0.98939
							12.4809	0.995879			3.16228	-0.0888625			12.7968	0.967139
							12.7201	0.988585			15.6713	0.971507			9.33257	0.994231
							9.42214	0.815528			16.4922	0.960918			12.9026	0.98536
							10.8095	0.762228			22.0354	0.944437			12.5428	0.911216
							7.68437	0.36953			17.3644	0.603334			12.1421	0.243242
							16.3997	0.333324			24.8594	0.987571			15.1138	0.921375
							6.89724	0.908569			14.7728	0.974433			0.000149012	-0.0211355
							9.95151	0.996883			2.04114	-0.242383			11.7552	0.990229
							11.9994	-0.932276			22.8123	0.967758			11.1849	0.870508
							20.4685	0.966785			6.14729	0.857789			14.8859	0.977599
							11.8162	0.616788			24.102	0.989852			15.0531	0.988081
							17.5053	0.96367			28.0679	0.98612			11.5702	0.878774
							9.3092	0.992699			26.5369	0.951398			6.60896	-0.217686
							13.0564	0.936367			1.4573	-0.429842			4.47756	0.894732
							19.2374	0.987285			17.0623	0.987943			14.8485	0.994181
							19.3592	0.975613			20.9243	0.379972			0.000149023	-0.225621
							16.7209	0.974578			18.5066	0.896468			14.9002	0.99704
							23.2479	0.574935			19.5363	0.93456			9.76316	0.962428
							2.32715	0.606851			19.1128	0.939038			12.8825	0.972811
							3.9028	-2.63013			17.1422	0.839281			5.61091	0.929511
							9.90971	0.945263			14.9536	0.9734			10.247	0.935648
							3.09691	0.65255			17.3168	0.99905			4.0992	0.834591
							24.2185	0.946349			4.08115	0.240166			9.89819	0.98695
							13.5799	0.986427			18.0005	0.980016			14.5055	0.999057
							15.1229	0.734209			21.8411	0.892796			12.0156	0.895864
							12.216	0.959366			25.7195	0.970053			12.3446	0.94099
							10.5776	0.989438			19.1077	0.981752			6.05532	0.943786
							12.9775	0.995781			17.4949	0.99221			15.6977	0.893248
							13.7788	0.969229			1.78432	-13.0155			15.2148	0.996256
							11.8844	0.744415			12.4716	0.48901			3.07707	-1.32603
							8.29721	0.154796			16.6383	0.983733			13.3135	0.987673
							5.04409	0.911861			19.539	0.998197			11.3347	0.994068
							14.2201	0.998602			24.3396	0.852092			10.1696	0.909241
							15.4436	0.923781			4.7643	-0.861251			7.45162	0.513746
							11.879	0.949517			21.0144	0.948041			11.2557	0.995767
							14.6032	0.82381			20.7271	0.812407			3.68468	-1.31277
							14.4964	0.991583			9.07837	0.407702			7.58184	0.784239
							6.04593	0.986743			1.17371	-19.2088			15.2163	0.972496
							16.2923	0.989658			19.2701	0.970415			28.4355	0.770204
							21.7408	0.902102			11.9851	0.905502			13.559	0.998123
							11.7	0.898027			19.4068	0.839379			11.5868	0.997014
							7.64359	-5.92254			3.16228	-11.9057			14.1776	0.877671
							13.5304	0.907749			25.9225	0.775454			12.1575	0.946616
							12.0345	0.976442			13.4022	0.980682			11.4847	0.990991
							16.871	0.919709			17.907	0.779364			14.2137	0.830063
							16.77	0.957469			11.5472	0.984337			12.5536	0.910954
							7.73887	0.725661			8.04755	0.328094			10.807	-0.622625
							12.4019	0.987132			6.64548	0.549583			7.46087	0.997687
							16.5938	0.930453			0.923428	-1.36902			3.36594	0.649953
							14.1572	0.995835			20.1526	0.979292			11.7895	0.890787
							14.3373	0.998518			19.6909	0.984045			4.68541	0.883234
							9.22675	0.903997			14.7043	0.718679			0.00444024	-0.036456
							15.2957	0.791962			20.3245	0.914341			2.00346	0.030877
							13.2095	0.906772			18.7077	0.986372			20.5847	0.915067
							19.5422	0.991241			13.797	0.966057			10.9109	0.988614
							19.2121	0.922188			19.9739	0.991366			14.8083	0.996194
							16.6838	0.995333			20.1392	0.994936			6.13679	0.954427
							16.668	0.967259			16.584	0.923926			11.7433	0.998507
							14.7265	0.89097			22.8404	0.0614877			13.5686	0.942826
							19.8088	0.944929			21.8929	0.889838			5.29815	0.987106
							16.3997	0.984095			24.687	0.899644			3.39564	0.499937
							13.6727	0.984548			7.54825	-3.67739			0.158114	-0.721777
							11.9529	0.993244			22.023	0.869675			1.19357	-0.100995
							29.6222	0.905554			16.2833	0.974809			11.3827	0.905809
							7.10969	-3.28271			4.83018	-1.32872			8.03765	0.991218
							2.76264	-0.439214			14.6346	0.944461			12.8243	0.990171
							9.70726	0.998844			19.5733	0.976719			21.1738	0.984511
							18.3696	0.99015			10.1498	0.992343			13.4426	0.993935
							18.1323	0.990065			22.1319	0.881812			12.5407	0.982657
							18.3429	0.975299			14.3393	0.973782			17.4003	0.984345
							18.5907	0.963752			18.0177	0.984421			5.49298	0.979711
							17.9934	0.965345			6.15998	0.449662			13.7962	0.961106
							14.1317	0.695002			18.4033	0.99549			16.8858	0.995838
							21.5525	0.970128			25.9492	0.940604			14.0962	0.996408
							17.0146	0.951979			17.4027	0.974068			12.5983	0.999354
							5.41291	-4.01406			22.5437	0.928942			8.75155	0.811212
							14.8499	0.905606			17.2389	0.888431			11.0339	0.163972
							22.4904	0.955472			23.3297	0.987822			10.2638	0.99504
							5.03967	-0.512457			15.6279	0.966526			10.9111	0.992858
							0.263686	-0.00690967			11.2434	0.647127			8.57902	0.943267
							16.5039	0.990445			18.6011	0.982918			15.5736	0.9985
							17.8005	0.953398			11.6363	0.996587			6.38123	-1.83848
							10.3064	0.982961			23.9	0.974823			14.862	0.991818
							19.1115	0.970556			16.9598	0.970177			3.37657	-0.646524
							10.1787	0.980389			14.6962	0.989982			3.05907	0.330345
							22.529	0.983287			22.4855	0.980033			11.3034	0.978343
							11.4323	0.0664103			19.1858	0.975622			1.7241	-0.52175
							15.6357	0.993644			28.5594	0.922724			5.57003	0.541413
							14.053	0.982186			1.29862	-0.118154			22.6991	0.978471
							16.5465	0.712117			20.1762	0.970455			8.58729	0.980925
							16.6169	0.939194			9.48151	-0.390183			13.0155	0.997554
							11.3339	0.989541			23.5881	0.931285			11.7446	0.970869
							16.1351	0.9655			22.511	0.970695			14.1452	0.956846
							16.649	0.931831			24.0083	0.776434			15.3752	0.997132
							5.96194	-4.45677			17.2728	0.80817			14.7759	0.978089
							6.58329	-0.458406			15.8478	0.995197			14.6852	0.992753
							19.0895	0.983593			17.8422	0.875581			9.15475	0.954331
							15.8234	0.814956			18.332	0.993692			12.2521	0.989775
							3.03843	0.499787			20.3794	0.955889			0.686006	-0.230533
							18.4109	0.952941			12.2996	0.926051			10.3861	0.973868
							20.6422	0.993365			18.6986	0.980855			12.5298	0.88347
							11.6842	0.97437			9.35689	0.972385			17.4776	0.949598
							16.6453	0.989857			8.06868	0.443732			16.5196	0.962675
							14.5564	0.993305			15.7255	0.734532			7.30305	-1.75249
							15.553	0.954759			1.85999	-1.70688			7.64822	-0.0838054
							20.917	-2.58648			22.1992	0.994103			28.5618	-5.42695
							2.72352	-0.967384			13.6134	0.912953			12.5234	0.925284
							22.2794	0.978688			18.554	0.911204			7.49232	0.997238
							18.556	0.956238			19.3806	0.91554			2.88789	-0.0685472
							22.3439	0.981081			3.16228	0.718235			8.91907	0.891928
							14.8466	0.995985			2.03126	-0.435624			14.1393	0.960923
							19.571	0.937063			18.4076	0.979851			20.2284	0.864944
							23.6805	0.914117			7.60968	0.782064			6.07339	-6.08048
							7.55681	0.758702			21.2317	0.983078			13.6267	0.965352
							18.1085	0.925612			19.4108	0.985411			11.5507	0.995375
							28.4234	0.942197			15.8008	0.678189			12.8578	0.987819
							20.2565	0.888025			17.2265	0.985954			11.6361	0.993895
							0.000149012	-0.0473728			16.3891	0.948166			9.8671	0.725563
							17.3006	0.964446			15.7005	0.987611			4.98652	0.674491
							19.7811	0.992349			13.9214	0.975834			13.7597	0.996557
							19.4323	0.967631			17.0699	0.991431			7.82899	0.913668
							15.6838	0.979072			14.7706	0.973668			10.6262	0.940527
							23.9651	0.941578			25.0777	0.982129			2.64266	-1.1148
							13.7071	0.986618			19.7923	0.986523			9.87963	0.826571
							21.3596	0.956042			21.4072	0.749716			11.5555	0.985118
							13.8763	-5.04612			19.555	0.361327			17.0548	0.980413
							13.6179	0.994817			17.7907	0.960634			9.83912	0.938646
							21.0076	0.993798			19.6313	0.988092			14.5988	0.986746
							14.6236	0.934981			5.04982	-0.634407			10.4567	0.995143
							17.2609	0.978262			23.2426	0.94108			10.6333	0.997864
							24.5051	0.99826			18.5384	0.986707			16.348	0.993895
							16.16	0.980796			13.1496	0.987718			12.8272	0.996144
							17.2019	0.989558			19.017	0.943149			17.3405	0.772511
							17.6983	0.939632			18.8547	0.991738			5.22886	0.961706
							19.5284	0.777379			13.2539	0.932257			12.5621	0.992676
							16.0369	0.940553			22.7503	0.972168			13.7211	0.952401
							15.9405	0.9899			22.1883	0.945725			17.3678	0.989427
							0.971982	-0.244212			18.7517	0.971062			14.5748	0.998823
							25.2587	0.989775			19.7847	0.957557			14.7527	0.896726
							12.4067	0.977296			21.8946	0.993506			0.00304944	-0.182867
							14.5124	0.999395			17.1248	0.989064			8.44035	0.723385
							21.3447	0.957259			14.2939	0.936082			9.74241	0.913608
							23.3614	0.915133			15.5276	0.946343			10.6766	0.700849
							19.9073	0.978498			5.87281	-5.42646			14.55	0.995868
							24.4873	0.93423			18.9582	0.98693			17.3075	0.976293
							7.57522	0.860064			11.4423	0.755966			10.9201	0.917205
							19.041	0.94217			16.3903	0.977202			16.878	0.969162
							23.0489	-0.00261416			17.6085	0.995213			7.7979	0.971844
							0.00287309	-0.00554676			19.1995	0.960685			15.9656	0.989002
							21.3073	0.993709			18.8837	0.945671			11.219	0.873301
							20.5722	0.99148			20.5986	0.768454			10.5357	0.952132
							20.4389	0.925024			12.4264	0.994207			17.0992	0.883519
							25.9467	0.980445			22.5814	0.945565			17.1827	0.701466
							16.1852	0.908573			16.7793	0.992465			10.8818	0.922247
							14.662	0.989137			16.7058	0.883472			19.6509	0.838463
							16.5992	0.888238			17.3443	0.971183			12.4671	-0.378597
							21.8776	0.984982			16.1149	0.98823			14.2132	0.928126
							8.99851	0.910943			17.5384	0.978913			10.4563	0.908535
							21.6308	0.979137			23.6213	0.950671			15.3842	0.956285
							15.1443	0.869368			18.096	0.993826			14.5488	0.995217
							9.92993	0.772152			16.091	0.80271			13.0329	0.985426
							14.5077	0.953052			18.816	0.985987			0.653842	-2.67985
							5.49693	-1.49836			20.7084	0.993419			14.6147	0.662256
							19.4273	0.993281			18.4849	0.991317			11.9467	0.994335
							12.4564	0.871703			16.2122	0.808258			7.92995	0.939259
							21.234	0.98407			18.2036	0.950201			12.2051	0.998274
							23.3672	0.958088			15.9327	0.982825			9.78006	0.993437
							15.8221	0.974777			18.9912	0.989633			1.27789	0.206315
							22.3326	0.972015			19.3393	0.975198			14.017	0.994919
							31.3692	0.968538			18.1619	0.968672			17.2887	0.986459
							12.5715	0.990172			10.225	0.984244			12.2486	0.934643
							1.43918	-0.579755			20.0815	0.899957			0.53558	-0.0288876
							2.03302	0.815073			13.0737	0.806424			16.8193	0.994206
							0.00276496	-0.00980593			12.4822	0.985884			10.4227	0.831763
							16.5434	0.954019			15.2407	0.995994			3.2076	0.32863
							25.3636	0.905494			18.0959	0.993239			6.88389	0.725199
							11.0315	0.898433			20.925	0.791369			8.29379	0.758529
							13.6775	0.691413			21.2566	0.950912			8.37783	0.822043
							22.9013	0.989375			17.1478	0.997145			17.0282	0.961578
							18.5252	0.991134			15.2162	0.9903			11.5563	0.993418
							8.68679	0.929398			13.6033	0.968104			17.4714	0.984625
							22.2285	0.976455			19.3058	0.984578			10.7164	0.953398
							18.3077	0.904775			15.4595	0.994582			13.4285	0.965209
							9.9389	0.941482			20.3949	0.946487			16.7797	0.994891
							13.4184	0.948259			14.8268	0.835112			12.4962	0.996202
							16.4791	0.987428			17.0513	0.958281			10.3594	0.985912
							14.0043	0.653768			19.7506	0.987265			10.518	0.968513
							20.0811	0.982709			17.1573	0.8821			8.52474	0.981078
							20.476	0.998099			20.4188	0.948076			11.8462	0.996157
							18.8415	0.990023			24.894	0.993142			7.2398	-1.82521
							11.8308	0.897926			17.506	0.987678			17.4727	0.985799
							16.7393	0.968004			23.9224	0.986734			13.4069	0.973326
							18.1567	0.9947			19.736	0.951394			11.2901	0.993762
							22.0339	0.939278			19.4536	0.997642			13.2791	0.978248
							16.3908	0.955827			18.8372	0.993644			12.3774	0.926693
							18.5011	0.511018			23.2045	0.991529			12.9169	0.996488
							23.2384	0.883565			16.2187	0.946385			17.4542	0.986973
							18.5508	0.966213			20.3554	0.933386			10.5236	0.998243
							15.5052	0.981236			10.7086	0.982174			3.23353	0.579754
							1.48634	-0.0618412			5.07723	0.842341			11.2119	0.930486
							13.5835	0.983677			13.4891	0.483442			13.3339	0.974601
							20.8105	0.981423			10.6968	0.246401			16.3208	0.96259
							17.9619	0.98124			11.3601	-4.57821			8.63526	0.991896
							20.1331	0.993572			9.84118	0.839895			16.2021	0.516431
							19.5894	0.795137			10.521	0.822795			2.29089	-9.33919
							0.00391311	-0.158301			10.8494	0.974323			13.064	0.993146
							17.1751	0.973696			10.3881	-5.99022			16.8818	0.996985
							16.8826	0.986051			14.8837	0.641934			6.97895	0.981659
							13.7832	0.95842			4.57522	0.741761			35.0237	0.957583
							18.243	0.990393			2.84621	0.353887			10.2345	-1.08105
							22.4518	0.907058			0.0739206	-0.421622			8.53777	-0.627437
							0.13368	-0.638098			7.18365	0.95324			10.2155	0.995665
							13.6041	0.785326			14.9686	0.987925			8.83439	0.99466
							10.8854	-1.65485			1.41919	0.643444			16.6697	0.987837
							8.00388	0.958249			21.0854	0.958189			11.9105	0.875508
							26.2593	0.872333			1.03918	-0.183927			3.01007	0.957547
							25.2909	0.884226			7.28949	-0.655498			10.2604	0.927622
							24.1449	0.958067			16.7277	0.958361			11.7795	0.994656
							11.2013	0.688304			14.9271	0.0874991			9.08333	0.981228
							1.86027	-0.153053			13.1274	0.70177			7.56761	0.923782
							18.9895	0.990355			15.8343	0.993848			21.7917	0.9564
							20.246	0.991374			7.19207	0.994928			12.3616	0.670786
							16.7588	0.996276			14.4851	0.938498			9.60949	0.901684
							24.0534	0.960484			6.15226	-0.476593			14.288	0.987042
							20.5497	0.978339			10.2677	0.965797			12.9296	0.993222
							17.357	0.955397			7.05788	-2.70944			12.8787	0.996825
							17.4545	0.983955			5.52399	0.201391			11.2633	0.995726
							23.1619	0.955405			22.2737	0.97478			6.8434	0.233045
							16.4665	0.938783			9.96731	-1.15056			4.38637	0.646308
							18.1876	0.964456			8.92229	0.79906			1.18125	-7.98983
							17.1525	0.984695			15.8065	0.99838			17.4556	0.932435
							13.7267	0.907161			8.59375	0.927211			11.3903	0.99443
							19.6199	0.994567			14.3481	0.970537			15.9605	0.99655
							20.3524	0.932601			6.20693	0.657678			9.32494	0.9989
							16.6129	0.992211			13.5735	0.675785			16.0584	0.998196
							12.3793	0.976657			11.4934	0.933775			17.6355	0.990566
							13.1939	0.986225			10.9231	0.921632			8.40934	0.884766
							5.67079	0.996705			11.276	0.98722			8.62083	0.986453
							21.1438	0.871585			8.0656	0.85286			13.9927	0.99807
							1.38838	-0.679972			13.3004	0.991417			5.23585	-0.976513
							29.6535	0.883041			15.0509	0.757044			10.6816	0.973831
							24.3755	0.639754			23.2856	0.989707			8.28348	0.940378
							19.7331	0.937329			8.52691	0.999937			17.5564	0.997979
							17.6393	0.971628			13.3166	0.69353			17.0249	0.997291
							6.6284	0.171221			17.8494	-0.998771			14.7443	0.995623
							1.11318	-0.499641			10.2109	0.837848			12.9634	0.89292
							15.0134	0.595484			4.70822	-0.421406			20.3656	0.987599
							17.4036	0.994593			6.56877	0.202151			17.512	0.993119
							1.88653	0.745646			23.5835	0.723799			5.90229	-3.34741
							23.783	0.932653			0.00699343	-0.0149805			11.7037	0.974501
							19.7532	0.955594			12.0187	0.280511			17.3457	0.983507
							21.2826	0.986725			7.85179	0.98426			18.3474	0.987295
							13.0672	0.967118			0.00574778	-0.00749118			18.5707	0.975855
							11.4844	0.996338			11.395	0.644563			11.4745	0.791706
							19.2304	0.659336			14.8603	0.646229			12.3202	0.935178
							18.0979	0.987245			2.34496	-19.9083			14.7088	0.977639
							15.4314	0.878981			13.863	0.684371			13.3485	0.984884
							25.2562	0.919641			8.61099	0.91745			16.9673	0.992335
							23.9507	0.952107			7.94908	-2.41677			15.988	0.842347
							27.7366	0.977474			13.71	0.34887			10.676	0.955169
							19.8874	0.966247			4.83748	0.496033			11.7931	0.992814
							2.29404	-61.4523			13.1381	0.726353			2.77523	-0.962406
							20.5249	0.959203			20.0058	0.942207			21.9979	0.910125
							1.85748	-0.532943			18.1061	0.975728			12.0778	0.737916
							0.0290482	-0.184837			9.42151	-1.30258			13.3932	0.99786
							19.5805	0.952639			22.489	0.961396			16.7933	0.993495
							3.37834	0.485861			1.29314	-0.185583			18.2183	0.953993
							21.9127	0.995156			13.8748	0.997602			10.4426	0.889623
							4.86607	0.967713			1.84469	-1.43883			10.5192	0.941699
							11.852	-25.8008			3.89226	-2.12175			9.78818	0.877117
							15.4774	0.989452			13.7532	0.987545			17.147	0.997316
							1.64912	-0.031096			10.0348	0.931896			11.2569	0.993482
							12.6977	0.896648			15.7912	0.729656			13.1593	0.983735
							1.18959	-0.0628605			8.36002	0.802089			13.2111	0.982848
							18.2635	0.953238			0.00303494	-0.00356286			12.2077	0.778316
							1.96445	-1.20689			6.72866	-0.637151			11.988	0.990942
							17.7043	0.686566			13.768	0.855125			2.23081	0.180682
							20.7485	0.972062			16.461	-0.0716992			12.717	0.982854
							10.1276	0.0550987			2.75647	-0.521773			16.2285	0.994605
							8.703	0.869836			9.24941	0.779531			11.0358	0.991294
							3.05969	0.48732			10.4738	-0.801372			16.613	0.921742
							15.7437	0.944576			10.759	0.964722			10.6077	0.974359
							0.000149012	-0.00877671			2.49768	0.703699			2.55364	-2.15664
							1.48833	-0.360177			13.546	0.980113			15.123	0.997544
							8.99387	-0.294345			14.4333	0.0331937			10.0942	0.998486
							19.6412	0.94426			19.0668	0.972075			15.1225	0.950407
							2.68441	0.963614			12.3224	0.966367			10.4361	0.0328407
							18.4376	0.992259			9.69859	0.857806			2.59041	0.430715
							1.71882	-0.954949			10.7987	-0.284559			12.619	0.989173
							17.5072	0.994472			20.8956	0.991991			11.5537	0.906427
							17.5511	0.979605			4.465	0.677939			13.0471	0.99889
							18.5169	0.408189			18.3547	0.988715			0.824878	-0.117994
							4.6602	0.941038			4.4105	0.481917			16.7204	0.951683
							1.70114	-3.79458			9.61896	0.995051			7.20726	0.975488
							8.86368	0.885409			14.1319	0.939886			5.78418	0.962408
							13.7275	0.996565			0.0044381	-0.00858043			16.0824	0.972878
							13.0407	0.818641			6.09481	0.791218			7.15117	0.53182
							20.9303	0.987148			12.4702	0.962445			13.5391	0.997005
							13.1719	0.944958			3.98804	-0.486499			7.83864	0.951042
							6.72975	0.663725			1.05146	-0.0466255			10.5077	0.995951
							13.8243	0.456024			6.43121	0.930358			12.4881	0.994948
							3.31796	0.641454			21.997	0.988795			8.6335	0.988672
							16.544	0.988715			4.3144	-1.2871			2.3796	0.794001
							5.74415	0.892634			13.9653	-18.5429			7.12773	0.979285
							6.47507	0.583683			8.81465	-0.718003			12.5429	0.94753
							15.4947	0.832823			11.2222	0.954721			5.18751	0.363347
							26.0006	0.849934			9.57873	0.993596			16.8028	0.988809
							18.1061	0.986858			11.673	0.943939			19.2089	0.997787
							14.4422	0.976674			10.9764	-1.68848			9.88239	0.9706
							19.1066	0.908869			18.9574	0.84348			2.92627	0.97202
							12.9334	0.99778			8.16129	-2.90702			14.7153	0.878089
							20.5487	0.761415			13.9382	0.605409			8.71935	0.707663
							11.7501	0.925363			9.32431	0.350863			4.95961	0.950522
							9.3455	0.981161			13.7699	0.944915			14.7074	0.991976
							5.08566	0.806225			5.50734	-1.51215			10.2458	0.985263
							12.3613	0.957586			1.93876	-0.808871			14.5479	0.973485
							26.4385	0.981685			18.5435	0.995605			13.8915	0.82723
							3.47923	-1.39161			9.62724	-2.23734			7.47705	0.89625
							16.1716	0.956657			5.83262	0.731751			7.19993	0.956042
							20.2714	0.947711			8.24996	0.775497			13.0167	0.999191
							11.9306	0.910312			19.7877	0.976078			13.1505	0.97416
							16.7741	0.993427			18.5856	0.968063			6.95966	0.0422718
							1.25367	-0.585036			12.3532	0.853981			10.2588	0.991575
							10.1191	0.992347			16.4985	0.828422			2.03399	-0.949765
							11.1011	0.984499			19.1078	0.990543			11.1485	0.988103
							11.5452	0.961256			1.21994	-0.305223			10.1083	0.981755
							7.83543	0.962409			17.9375	0.765116			5.95941	0.902271
							0.683765	-0.0541426			17.3615	0.978055			3.70006	-0.705091
							14.9442	0.995479			7.67177	-3.46257			9.10314	0.961855
							7.33357	0.813944			17.4777	0.998685			14.4517	0.940177
							11.1931	0.997989			18.1285	0.986329			20.2754	0.996999
							13.8672	0.93088			0.145259	-0.326619			5.59424	0.959838
							14.9416	0.852621			6.61434	-0.359462			12.3135	0.906094
							1.43745	-0.15272			17.0005	0.907181			12.2144	0.973895
							14.6476	0.971592			12.4834	0.951042			9.32121	0.926945
							3.92734	0.479991			4.12247	-0.309713			15.7761	0.990703
							13.4618	0.93265			11.2889	0.509143			7.05555	0.989951
							14.6656	0.97895			18.1309	0.979722			12.4088	0.981789
							5.51437	0.986251			8.65966	0.744709			15.1809	0.918492
							17.6247	0.994585			10.4105	0.3883			6.04459	-0.0969191
							3.90388	0.666954			17.1072	0.95872			11.6209	0.92393
							3.16228	-1.26006			22.0135	0.943899			13.7886	0.997037
							7.55593	0.932664			4.50087	0.940319			4.95754	0.859725
							12.3013	-8.37193e-05			4.83258	-1.21274			10.8122	0.974019
							0.00249822	-0.0612107			4.05361	-1.09288			12.5674	0.993913
							5.05595	0.921657			2.33344	0.285663			1.48524	0.100057
							11.3101	0.982313			1.06615	-0.613985			9.17235	0.880695
							14.5188	0.996066			13.7792	0.320922			11.9144	0.776284
							24.1187	0.966			25.8759	0.81813			1.6628	0.296949
							15.2174	0.946726			15.239	0.969044			7.29019	0.99797
							20.0011	0.935941			10.3838	0.977008			13.5865	0.840681
							15.5781	0.979372			2.66457	0.0301311			3.69381	0.507837
							2.87671	-1.30715			5.86515	0.949834			16.0143	0.995611
							21.1399	0.986497			4.72653	0.707519			3.16144	-0.584161
							2.71943	0.792678			15.1201	0.832374			10.4027	0.973191
							10.229	0.878579			13.597	0.798852			6.19338	0.58821
							14.33	0.979089			15.5777	0.571045			7.13158	0.715304
							21.0584	0.675772			8.53232	-0.361099			14.9703	0.961181
							0.00771697	-0.524661			7.93771	-1.68475			8.87607	0.953104
							9.6244	0.165005			15.4713	0.699033			6.95379	0.976372
							11.5254	0.977756			18.7366	-0.163577			1.63709	-0.138231
							8.3245	0.920071			9.52624	-0.356676			8.73828	0.612576
							6.44133	0.410667			9.91632	-9.75762			9.23998	0.993371
							2.75261	0.627038			0.000149403	-0.0330414			9.41677	0.899623
							15.6852	0.96644			39.8309	0.474456			11.6442	0.956197
							6.82415	0.779186			16.3032	0.994954			12.2141	0.938728
							11.064	0.916034			8.51295	-12.6256			9.37118	0.9237
							14.6369	0.973146			16.6033	0.951918			10.8954	0.909806
							15.0765	0.997523			17.7292	-1.28388			20.0513	0.972107
							17.5764	0.972494			11.8804	-1.06352			13.0488	0.981182
							8.30503	0.972676			16.2713	0.982317			15.8613	0.99783
							7.5352	0.921307			18.8001	0.996905			8.99183	0.99819
							26.7243	0.873806			5.96788	0.849331			12.7818	0.995804
							14.578	0.99163			0.0052536	-0.00102789			15.2428	0.899363
							14.7566	0.927576			12.6266	0.755456			13.6355	0.960428
							2.32092	0.237737			12.0002	0.813965			9.76471	0.993311
							12.5	0.188522			15.7912	-0.573448			7.45314	-0.21135
							21.9475	0.990459			9.73651	0.898345			1.74008	-0.643078
							14.9341	0.995711			16.2601	0.900784			14.5143	0.939469
							2.58144	-0.0966608			2.30688	-0.68605			10.8845	0.987286
							11.1537	0.971038			4.47402	-0.223835			11.1707	0.921251
							4.17935	0.297485			0.000149977	-0.00246309			10.9428	0.989368
							14.1889	0.989456			2.04718	-0.033932			8.48042	0.873524
							14.3237	0.9911			8.98948	0.855971			9.76615	0.982789
							13.5852	0.971542			18.0387	-0.895571			6.98535	0.992703
							9.54412	0.969349			3.59123	0.196314			11.9718	0.927616
							12.7343	-1.55148			7.35307	0.611548			11.1576	0.648484
							5.87024	0.916623			9.15036	0.536012			6.16538	0.722828
							9.92018	0.887216			20.8942	0.700077			0.000149314	-0.00384433
							3.57469	0.591349			14.5649	0.916249			7.24991	0.658174
							12.847	0.979127			16.9153	0.989878			11.9602	0.993463
							12.4953	0.974003			10.2076	0.621312			11.6114	0.993409
							12.9646	0.992606			11.9096	-0.387677			17.3755	0.962756
							15.6206	0.990922			5.58453	-1.40718			20.5431	0.996635
							2.85519	0.195842			13.334	0.146877			2.27354	0.209784
							15.3698	0.996088			0.00238924	-0.00864692			7.81156	0.980043
							15.2531	0.993754			1.57036	-1.05004			11.2612	0.98915
							6.15244	-0.594536			18.2301	0.880339			3.03472	0.923229
							12.5269	0.998369			14.352	0.973968			0.240886	-0.0208265
							19.4092	0.982332			30.5384	0.921102			10.4212	0.997539
							1.34656	-2.47456			21.24	0.970988			9.02349	0.980374
							21.9745	0.992948			16.6847	0.982514			10.9331	0.972419
							14.9928	0.965572			14.4399	0.64955			7.08956	0.958176
							5.01247	0.925251			11.8894	0.678307			8.02475	0.976789
							2.36833	-5.51557			3.53394	0.0584433			10.3033	0.947835
							2.21854	0.953179			14.9899	-0.105316			11.0351	0.997677
							18.1462	0.98891			8.48869	-0.00900666			13.3759	0.963112
							2.96506	0.730247			27.6205	0.839853			14.4537	0.97185
							21.7531	0.99483			11.7127	-0.667411			1.41833	-0.134112
							11.1458	0.478142			23.0237	0.987685			12.8443	0.99846
							11.7817	0.936673			11.6202	0.955026			15.5251	0.987281
							18.6156	0.98269			8.78187	-0.69712			17.3376	0.993047
							14.6421	0.994361			1.28969	0.00582034			17.7235	0.981489
							22.9386	-0.0317954			1.50083	-0.276056			1.8639	0.0682077
							16.3201	0.91354			0.000149034	-0.1109			4.70023	0.92246
							11.6439	0.983843			14.7035	-2.5551			13.0039	0.99825
							9.05905	0.980395			15.1509	0.127483			12.1386	0.639265
							1.89962	0.322191			19.3549	0.914564			10.6735	0.893412
							11.3417	0.978021			17.2822	0.446548			12.838	0.997557
							12.7711	0.995342			22.9833	0.901511			12.1781	0.995612
							11.0195	0.990147			14.1699	0.847589			6.88419	0.950384
							15.4779	0.990581			8.68395	0.620861			2.25774	-0.655878
							1.82724	0.105675			8.61096	0.869413			18.6221	0.955042
							18.8951	0.9965			10.5749	0.598472			9.25599	0.990117
							14.8046	0.993541			10.7354	0.895162			9.70297	0.983203
							0.0787057	-0.184159			12.0304	0.84576			9.99096	0.996729
							2.39649	-6.92141			16.1884	0.954409			7.39687	0.996468
							20.4031	0.965495			21.5808	0.847287			1.65421	-4.00932
							6.00807	0.898755			21.2382	0.951669			19.7315	0.975853
							0.687268	-0.527716			9.83037	0.894274			6.73662	0.990096
							14.7155	0.966691			16.5093	0.73481			8.93924	0.998359
							15.1955	0.791526			20.9106	0.965816			13.87	0.976817
							8.65975	0.775454			5.69264	0.989951			9.10819	0.712881
							10.8015	0.960572			10.1368	0.953778			8.97185	-0.89788
							5.12425	0.86203			5.31326	0.892438			6.47693	0.984351
							7.11119	0.967337			6.86862	0.784198			8.66524	0.975666
							14.4375	0.98478			18.4431	0.980286			15.2564	0.978236
							15.7386	0.996456			15.423	0.938616			7.47893	0.903563
							2.66253	-1.65861			16.7952	0.999112			1.50354	-0.210154
							12.6268	0.883875			15.3083	0.942478			8.8838	0.986846
							19.8473	0.983922			16.4582	-24.0712			15.3905	0.840408
							1.38386	-0.552531			16.5323	0.96962			11.1556	0.952623
							1.30927	0.428419			2.60589	-0.256457			12.4852	0.993856
							29.1931	0.86573			4.93694	0.110288			8.34271	0.992852
							14.3084	0.917095			20.0976	0.975108			9.9684	0.89144
							18.238	0.958417			11.0238	-0.875061			10.155	0.796055
							3.20938	0.904688			19.468	0.472894			2.29227	-0.868663
							14.3979	0.839842			22.8939	0.989429			8.39998	0.99289
							5.01871	-0.25983			0.000149452	-0.0147524			0.230297	-0.0292661
							16.8822	0.99047			15.7041	0.896658			12.3458	0.994222
							18.8698	0.973921			21.5175	0.979594			8.72114	0.995229
							11.1365	0.913974			6.22311	0.848576			9.96183	0.97556
							9.98589	0.807033			16.3909	0.787485			10.0627	0.89918
							4.99244	0.682592			18.3693	0.984002			11.9545	0.960432
							9.46789	0.414134			17.8299	0.914858			17.3953	-0.705487
							16.3382	0.997965			14.3045	0.953712			14.9681	0.987707
							22.8074	0.897245			0.00198313	-0.000466444			5.38492	0.794495
							1.38844	-0.616824			8.26709	0.974467			16.318	0.974266
							11.5257	0.628142			0.755333	-0.20212			6.55493	0.999638
							3.15792	-0.253319			12.0852	0.976548			8.6381	0.998809
							18.7872	0.981725			0.00476527	-0.39243			12.531	0.998769
							10.8904	0.978795			15.1175	0.995488			2.24793	-9.82862
							9.61453	-1.73763			18.1537	0.98333			1.78409	-2.5051
							14.5141	0.99385			13.3008	0.897362			4.50776	0.378744
							8.56121	0.960808			16.5528	0.98283			11.7666	0.997187
							14.7536	0.984544			19.7904	0.990075			10.2029	0.990334
							14.6243	0.895055			29.2627	0.79004			2.52643	-0.00339735
							4.68765	0.73895			22.0646	0.919456			13.8959	0.999496
							10.5614	0.609507			27.0305	0.971629			2.32735	-0.424383
							6.72903	-0.517682			23.4674	0.917427			12.1665	0.989785
							14.137	0.98364			15.5	0.69976			11.4438	0.94111
							0.843864	-0.553679			18.9835	0.752153			6.66443	0.968607
							18.7025	0.991452			8.56659	-2.93557			15.4196	0.998323
							4.18057	0.987155			17.0879	0.97813			10.4435	0.794482
							22.0609	0.663307			8.82765	-0.583049			11.3085	0.751426
							19.0846	0.946175			11.0624	0.988202			6.27859	0.948104
							13.3063	0.978753			7.62057	-2.44559			6.93379	0.955935
							12.3221	0.994385			18.1731	0.960688			15.9211	0.998281
							1.6516	-1.4274			16.1888	0.955637			13.3359	0.986594
							3.31429	0.466998			17.3903	0.59396			5.77699	0.95236
							10.7689	0.631168			5.41188	0.737717			8.3562	-0.263996
							4.97838	-1.14001			15.9947	0.736687			15.4478	0.985122
							7.12488	-5.15799			18.5262	0.983661			11.6548	0.86628
							1.91767	-0.539736			11.4755	0.829006			11.9707	0.808629
							10.5621	0.452503			2.78076	-0.192391			8.24028	-0.944018
							2.50158	-4.0182			2.6875	-1.08735			7.35866	-0.176328
							13.6999	0.0601263			9.31778	0.896819			19.3841	0.99034
							10.1021	0.941336			14.8037	0.936413			8.32667	0.969651
							7.06908	0.556994			13.7756	0.943216			3.16228	-3.71843
							4.43424	-0.0857208			0.000149075	-0.00176065			2.67924	0.246139
							14.0312	0.985515			18.4419	0.95286			16.7668	0.995815
							15.1794	0.875796			11.5287	0.890746			13.7734	0.996942
							3.33594	0.469074			12.6033	0.972644			5.44972	0.992714
							3.44074	-0.646316			11.9951	0.970522			7.38557	0.97047
							7.62214	0.935693			14.5806	0.940142			12.0983	0.868502
							13.8716	0.988084			16.8915	0.991552			10.2505	0.978197
							17.7537	0.996445			18.3856	-0.963615			7.29297	0.992449
							4.79394	0.981417			9.28131	-4.8801			18.7394	0.657876
							2.03465	-0.28897			15.9045	0.998682			7.00154	0.834752
							11.1942	0.885892			0.767562	-0.00614383			15.9582	0.960354
							5.60683	-0.877169			41.1093	0.930126			7.02458	0.915551
							4.89929	0.7718			11.4574	0.876421			6.38912	0.988163
							0.000151583	-0.105168			13.506	0.0677436			17.9161	0.989031
							17.469	0.988485			7.46267	0.982435			11.7658	0.957938
							8.08006	0.328076			10.4034	-21.0901			8.94828	0.946739
							0.00744542	-0.0111953			13.2188	0.884189			20.3491	0.905851
							15.4656	0.969912			5.15028	-3.6692			16.3644	0.880985
							7.57702	0.802568			3.52106	0.184387			17.8891	0.866851
							23.1402	0.987232			14.4063	0.94229			16.8102	0.964596
							11.8606	0.79647			15.426	0.931093			15.1881	0.999536
							17.2016	0.784332			16.6097	0.987583			22.3079	0.914854
							12.7356	0.393028			13.5727	0.953866			9.83917	0.748215
							32.7529	0.382001			24.8916	0.953479			12.5497	0.990211
							4.05626	0.9378			9.13259	0.045839			18.4188	0.989916
							6.27605	0.976047			4.45706	-2.16345			12.7053	0.986887
							15.2283	0.639969			7.98006	-1.66876			12.5677	0.997948
							17.1902	0.974016			5.95126	0.951203			13.5223	0.997523
							1.20459	-3.38144			8.66754	-3.97206			18.104	0.864666
							6.87653	0.992734			7.41372	0.951168			15.6678	0.988048
							7.48019	0.952256			8.45247	0.149562			1.10594	-0.0756381
							5.88819	0.978715			15.7885	-4.30193			13.8298	0.970995
							1.37243	-0.281323			19.5163	0.925087			9.77715	0.812246
							1.42644	0.801508			15.8266	0.96852			14.7742	0.971054
							15.7776	0.921355			14.1562	0.719885			16.2508	0.95123
							10.3896	0.999382			9.06011	0.537749			8.17643	0.976331
							0.569367	-0.292974			17.5785	0.900515			11.7027	0.990768
							0.0714004	-0.26687			21.1297	0.966936			9.39323	0.988172
							1.23854	0.00373886			16.78	0.983131			11.4412	0.994525
							16.6472	0.979829			0.480253	-0.011656			12.8093	0.996682
							12.1651	0.612605			15.7944	0.986938			5.47137	-2.20672
							0.000149017	-0.101176			3.9441	0.39752			17.1692	0.938622
							0.684005	-0.0328601			19.458	0.996218			13.4834	0.993191
							3.16228	-1.48157			7.40288	0.790901			9.18276	0.950305
							14.6675	0.996371			9.77901	0.990669			16.5043	0.971254
							10.3845	0.979545			11.8009	0.491745			13.5805	0.997561
							8.15174	0.939502			11.187	-2.08486			15.0405	0.96192
							2.15952	0.127621			12.905	-2.33885			13.8655	0.990138
							10.5208	0.936239			7.41191	0.666826			0.277448	-0.0259317
							3.53948	0.792842			14.6944	0.990705			4.70597	-1.06624
							2.28009	-1.44124			5.92116	-0.222453			14.3222	0.957299
							9.53232	0.985842			11.7676	0.922339			19.8978	0.964105
							16.7742	0.586988			12.8335	0.996923			10.8015	0.818166
							1.3766	0.3976			7.84847	-2.01961			11.812	0.97898
							8.89556	0.900655			8.48579	0.918336			14.6086	0.999388
							7.52887	0.919361			4.1109	-1.14164			0.0274774	-0.481701
							6.68345	0.988418			10.9581	0.969963			13.2309	0.994934
							6.07183	0.575172			23.9568	0.97273			9.59984	0.704957
							3.37248	0.59765			20.8928	0.959757			13.2073	0.976933
							8.45876	0.998465			3.56786	0.557933			7.67731	0.992698
							14.3022	-0.214305			13.3816	0.993465			7.15017	0.0417811
							3.94672	0.963469			0.112587	-0.0812771			13.2416	0.998286
							15.5713	0.760058			12.4512	0.379322			12.4434	0.981989
							13.3527	0.96756			16.4414	0.964283			8.90139	0.874736
							15.3114	0.976273			9.97387	-0.148762			9.6575	0.937562
							11.1785	0.999658			16.9766	0.510918			13.2087	0.790577
							5.18358	0.940965			9.63436	0.998175			18.6362	0.99006
							16.6365	0.991696			3.17365	-2.31057			21.8969	0.984646
							16.5166	0.969607			10.4806	0.979174			8.80632	0.988952
							20.5422	0.977524			10.6301	0.732511			7.22749	0.826449
							13.2393	0.925183			14.9959	-4.21019			12.4338	0.943904
							18.4292	0.742292			11.5144	0.978153			8.30849	0.771655
							1.27189	-0.566587			12.7367	0.802738			9.98247	0.988944
							12.9486	0.961721			9.69293	0.954226			20.6265	0.96728
							6.92049	-3.25748			7.97641	-7.16016			10.7017	0.991653
							15.1655	0.943914			6.12949	0.671204			6.11167	0.990979
							17.9721	0.80828			21.1412	-2.64064			12.7804	0.908585
							13.6333	0.857108			19.8342	0.95462			14.0081	0.976432
							26.961	0.971543			14.7184	0.990905			16.9787	0.977894
							17.0461	0.99173			7.66505	0.924902			11.8544	0.966333
							10.7785	0.924172			5.59754	-3.63276			6.85056	0.404296
							14.5902	0.935141			10.5472	0.885963			9.91664	0.98554
							11.4879	0.997048			18.1315	0.668713			14.5689	0.998846
							12.6746	0.951383			11.7302	0.958054			17.6148	0.971676
							21.447	0.994607			17.9057	0.924255			8.86226	0.632686
							19.4004	0.99117			13.8891	0.830787			8.88168	0.9653
							23.9145	0.889738			3.13712	-0.632324			10.3281	0.999412
							11.1652	0.848681			27.579	0.984799			13.148	0.946757
							13.8268	0.975585			8.68461	0.251689			18.4826	0.951977
							4.24885	0.310505			14.0329	0.265751			14.129	0.99718
							22.9109	0.975428			23.1712	0.984632			15.3917	0.965708
							20.0698	0.891837			21.7809	0.94758			13.3404	0.95172
							12.4905	0.96581			20.8297	0.813179			8.27881	0.975027
							12.9303	0.679241			15.5959	0.978051			14.9907	0.98648
							15.4842	0.984899			8.81949	-24.1108			7.70538	0.876942
							13.9915	0.957122			13.7782	0.973298			15.4018	0.974393
							12.1195	0.990924			16.9684	0.379942			14.7545	0.994091
							15.9628	0.98686			17.0777	0.830888			14.6312	0.990071
							15.9893	0.915223			10.6501	0.96666			3.15596	-0.374784
							6.18832	0.758192			6.50794	-1.13968			7.18158	0.934809
							18.9197	0.978084			9.17853	-2.03753			13.3258	0.989322
							11.9852	-0.484753			10.6059	-1.00935			8.25653	0.997928
							10.6262	0.843555			19.8262	0.969238			12.4468	0.998904
							17.9343	0.994258			19.5896	0.905738			14.5998	0.935449
							15.9147	0.979664			16.2412	0.989601			5.32175	0.42229
							10.6461	0.987911			15.3284	0.978308			12.1054	0.985594
							22.669	0.956231			16.8944	0.889482			9.75797	0.992156
							15.8562	0.973606			19.2213	0.923508			17.4676	0.985316
							13.3403	-1.18836			17.3471	0.59691			9.84784	0.976467
							13.3136	0.997065			12.4621	0.979812			16.4198	0.997466
							11.98	0.828258			25.0216	0.951351			11.8248	0.960659
							14.0015	0.97589			14.6233	-0.550658			14.4982	0.999359
							19.1632	0.988719			18.2882	0.952873			22.8235	0.967125
							17.3468	0.992887			17.3049	0.978968			13.2053	0.913667
							7.46238	-1.78807			12.7812	0.938985			13.8434	0.993952
							19.5725	0.945437			8.14208	0.311428			7.86708	0.864617
							18.0822	0.960686			5.36825	0.953356			7.39763	0.906897
							20.4222	0.741406			11.121	0.983847			15.368	0.995455
							14.3418	0.996214			19.3942	0.965453			7.90413	0.954447
							15.8487	0.99635			16.9755	-1.57554			10.7241	0.98295
							20.7655	0.98753			14.5693	0.929455			17.7084	0.972809
							17.1491	0.856016			19.8604	0.49107			11.2348	0.984173
							13.4861	0.995194			12.7398	0.995609			5.11778	-1.66501
							14.2163	0.973512			20.7393	0.121712			11.7589	0.998474
							20.9477	0.807621			14.3011	0.850543			9.97141	0.955519
							13.5336	-0.321846			20.2506	0.92879			15.3705	0.960287
							12.3925	0.98762			14.8753	0.395012			19.0434	0.995469
							21.773	0.938314			18.7267	0.624788			19.0313	0.998785
							18.5808	0.953879			15.2086	0.914838			23.1683	0.936987
							19.2937	0.992174			6.71883	0.984912			22.8517	0.95492
							10.0078	0.983988			19.298	0.981048			17.0314	0.988208
							22.6827	0.929798			17.3644	0.768155			1.85554	-0.0551865
							20.7841	0.993654			18.2951	0.65921			13.6204	0.9941
							15.8361	0.955387			19.0205	0.966587			20.4265	0.972405
							13.3584	0.993576			1.51709	0.0163986			21.7921	0.941714
							13.2908	0.998771			20.4907	0.814502			18.7418	0.842064
							11.5311	0.862165			10.3971	0.842775			16.9895	0.997501
							14.3352	0.975813			9.65514	-0.542			20.1473	0.977942
							3.589	-2.30633			26.6885	0.951636			12.5997	0.998586
							15.2204	0.995136			23.2198	0.994147			11.7158	0.976827
							11.141	0.670198			19.8922	0.647856			12.3105	0.999575
							15.5505	0.965999			11.8498	0.943663			14.5871	0.997586
							22.257	0.979574			16.4357	0.994539			5.39835	-0.235965
							17.6268	0.988441			25.6699	0.851367			15.1595	0.993563
							13.8539	0.897188			10.9076	0.399402			13.6832	0.889661
							27.6267	0.980771			24.4304	0.979546			15.8504	0.987866
							10.3403	0.354107			16.8589	0.95569			17.6083	0.969112
							18.9968	0.966371			9.34451	-0.658597			2.30024	-3.19733
							21.6917	0.837772			11.5829	-0.111329			20.2132	0.994416
							13.0305	0.997069			20.6336	0.842583			3.82209	0.0175817
							2.23574	-0.207377			3.05482	-0.800317			19.3123	0.992576
							12.2797	0.904123			12.8952	0.473042			15.6366	0.979664
							26.5884	0.624689			16.8206	0.986078			8.63073	0.987753
							6.6784	0.899963			8.23491	0.787721			16.8819	0.990768
							19.8866	0.964711			14.4094	0.99177			17.9119	0.99364
							3.50655	-1.9415			16.0978	0.74559			10.4746	0.971734
							15.6183	0.741284			11.4877	-0.614337			12.9733	0.974151
							13.3252	0.827978			20.4322	0.992191			17.6613	0.860808
							17.7705	0.972314			12.6459	0.985424			10.7692	0.984819
							16.7492	0.99077			13.0533	0.988706			11.1243	0.991564
							15.5876	0.964852			18.3305	0.90968			9.24374	0.981222
							17.2597	0.922947			5.8795	-1.03256			5.38865	0.962103
							19.3217	0.973564			12.8839	-0.199196			0.000149375	-0.000855533
							14.6041	-0.412214			18.5146	0.828682			16.3671	0.991132
							21.702	0.994849			22.2002	0.97495			11.4109	0.951788
							10.1308	0.983822			14.2215	-0.369361			7.12335	0.968553
							11.9029	0.969793			17.8406	0.990753			14.3355	0.98985
							17.7826	0.990911			7.7243	-2.14021			18.06	0.956008
							13.8541	0.712283			20.0561	0.91674			13.1525	0.991808
							28.0004	0.95085			15.0112	0.792777			0.00195464	-0.00788788
							19.9169	0.992059			1.09846	-0.324655			20.7146	0.978449
							16.5147	0.857261			24.881	0.935595			2.93927	0.926375
							21.7156	0.985095			2.54079	-0.399065			13.6285	0.972858
							21.4936	0.976773			23.4851	-3.73706			15.501	0.955775
							25.6005	0.951949			17.1445	0.885029			16.4078	0.997279
							23.8863	0.985464			13.4287	0.931689			12.2877	0.857
							18.0729	0.978639			14.28	0.910394			12.9214	0.994524
							17.4303	0.894818			10.017	-0.412308			13.0508	0.86945
							17.0208	0.981084			12.9543	0.831363			11.8673	0.986243
							15.5882	0.988338			22.8863	0.878588			4.77328	0.338228
							20.5718	0.937338			7.20486	-6.42973			20.9465	0.836426
							13.7151	0.574735			24.3453	0.947062			12.0213	0.996844
							14.9094	0.970627			21.6509	0.365998			15.3275	0.988181
							17.0574	0.973607			22.0618	0.885665			13.2222	0.992204
							0.00990558	-0.257809			25.4633	0.987816			15.3941	0.98957
							17.804	0.955157			13.9842	0.806715			17.6793	0.950691
							15.5888	0.925637			14.4998	0.970723			17.8498	0.990069
							14.6737	0.56413			12.4819	0.253221			7.80007	0.841553
							22.1266	0.990147			8.61107	0.969804			13.4853	0.967217
							19.9817	0.978678			16.6065	0.994224			5.25947	0.742836
							19.1067	0.6053			17.3195	0.903047			12.2378	0.737994
							17.2763	0.99181			19.6557	0.863856			8.63331	0.854935
							18.3199	0.975605			8.34987	0.601814			7.31208	0.989616
							15.1169	0.84696			11.7992	0.0875545			15.9948	0.999476
							17.5667	0.990904			24.4102	0.694844			12.3384	0.967804
							19.5512	0.979416			12.4761	0.915489			12.2572	0.999438
							17.1517	0.996797			11.2826	-5.10819			12.221	0.993476
							10.27	0.913394			2.55406	0.222741			13.2454	0.745115
							13.997	0.983752			9.72384	0.931404			2.98302	0.41395
							19.2251	0.963			15.0944	0.975494			18.7386	0.992992
							24.0868	0.958267			17.258	0.817361			7.3805	0.96364
							15.6248	0.985119			6.6822	-5.14551			10.6644	0.99614
							18.8294	0.97149			17.9943	0.987601			3.97796	0.966586
							18.8425	0.985729			7.94234	-0.881629			8.26172	0.973219
							16.5917	0.802503			17.0351	0.995227			7.52678	-4.26527
							12.3569	0.975039			19.404	0.977079			18.3707	0.982712
							17.2166	0.97809			15.7539	0.794132			8.99114	0.998033
							2.0164	-0.805075			18.169	0.434502			8.14441	0.962288
							16.53	0.986129			17.054	0.975738			15.684	0.976383
							19.4131	0.956809			0.158114	-0.584329			4.81563	0.961287
							16.9872	0.996191			16.1087	0.98419			15.3105	0.997383
							14.8849	0.978546			9.59982	-3.94032			13.3138	0.97741
							19.0793	0.990405			15.9577	0.970837			13.5384	0.855646
							20.5621	0.888031			21.9451	0.974243			11.0087	0.978678
							6.10717	-7.77296			20.0708	0.966386			2.17042	0.841501
							16.3006	0.905073			24.7623	0.970002			11.8636	0.998207
							5.54704	0.78185			10.0701	0.997726			12.8609	0.993355
							21.3672	0.976694			14.6171	0.888057			0.918588	-0.437725
							11.729	0.98855			15.8763	0.733997			8.42113	0.942587
							16.4605	0.953908			18.2722	0.929142			12.7728	0.996012
							15.4294	0.961345			9.12246	0.999757			16.9365	0.974779
							23.3795	0.966122			18.7666	0.992135			13.2822	0.99853
							16.3616	0.806822			16.2982	0.00965052			11.8692	0.994284
							19.7415	0.978031			7.51977	0.705251			3.83661	0.343695
							10.5256	0.916776			18.311	0.600476			13.0393	0.993551
							22.0821	0.991681			23.5022	0.944779			16.0159	0.98706
							19.0881	0.873588			22.5494	0.994475			7.35036	0.991017
							19.2141	0.578206			9.60172	-1.66773			0.00320635	-0.200217
							21.3411	0.935317			14.8236	0.85446			4.40717	0.868435
							17.0208	0.727899			22.3423	0.975187			11.0284	0.910162
							22.5124	0.931444			19.7816	0.948136			10.0142	0.968764
							10.0778	0.952688			1.93596	-29.5526			3.54003	0.99697
							1.2029	-0.107723			3.79752	-0.482772			15.0699	0.993439
							20.1561	0.972697			7.0012	0.95898			7.55961	0.983709
							17.8606	0.975321			15.6934	0.829497			14.6892	0.994445
							9.61763	0.712244			2.9882	0.376844			9.23492	0.989413
							23.1293	0.994231			14.8986	0.722789			13.3143	0.853042
							15.3259	0.986647			14.0612	0.173387			12.2215	0.91868
							18.1941	0.988401			17.2354	0.805269			15.5437	0.991224
							19.2812	0.95995			21.6567	0.174741			11.7641	0.998828
							16.585	0.978604			18.5633	0.963276			12.1662	0.999389
							18.6862	0.992874			14.8738	0.919029			13.3642	-0.493986
							22.1059	0.937958			18.9585	0.989242			1.66184	-1.49908
							21.0279	0.0480127			19.4234	0.659549			10.7329	0.855062
							16.1521	0.978531			21.1339	0.92836			7.78365	0.97103
							14.8891	0.807782			22.9245	0.956096			14.4493	0.995984
							13.3961	0.988156			16.5767	0.703471			10.2104	0.989646
							19.6566	0.943598			9.68021	0.730292			14.6955	0.99912
							17.8539	0.934786			12.3011	0.502247			15.5162	0.998848
							13.6167	0.863758			15.9097	0.967726			12.9397	-2.57428
							25.4957	0.992952			18.7322	0.962201			12.461	0.977563
							17.0051	0.996398			25.9826	0.989213			6.99508	0.880517
							16.9086	0.941564			4.91543	-0.923076			6.14889	0.916643
							14.9934	0.966839			18.9905	0.905897			13.338	0.986103
							20.8537	0.991178			2.75874	-2.19072			3.28644	0.931141
							15.7634	0.98584			1.05022	-0.166855			10.972	0.998388
							16.9674	0.996925			13.9397	0.879595			11.7289	0.945032
							17.2769	0.938824			9.76819	0.960395			1.35563	-3.68959
							14.2588	0.826015			19.1257	0.974257			9.98497	0.968494
							15.9083	0.997979			17.3462	-0.851497			19.2049	0.97255
							14.4891	0.979041			14.4233	0.864617			4.59315	0.995822
							17.1603	0.979096			10.5779	0.969337			7.96978	0.899597
							19.4913	0.750686			11.424	0.989447			2.96441	0.946648
							8.15283	0.910613			23.3273	0.925454			18.446	0.996982
							19.9287	0.989264			29.496	0.972066			12.1523	0.915941
							13.0959	-2.1601			16.6326	0.697192			14.3273	0.972202
							15.9405	0.983088			14.2076	0.981588			12.0363	0.999254
							14.783	0.976756			14.1256	0.602541			8.86058	0.951492
							3.28895	0.859787			10.5611	0.947225			9.39564	0.993266
							11.7273	0.990377			14.4802	0.803325			5.52179	0.955715
							10.2821	0.990956			24.3035	0.964296			2.92186	0.62042
							0.000149407	-0.025005			22.8322	0.992263			4.96279	0.945088
							25.7867	0.987061			16.7628	0.958656			12.5493	0.99914
							22.501	0.989469			24.1657	0.982187			11.1	0.963066
							3.54345	-0.10085			3.05384	-1.53535			4.20444	0.801345
							19.6881	0.807519			23.0921	0.848752			15.0449	0.996499
							14.8647	0.993759			18.5476	0.985613			1.99469	-0.202138
							5.73443	-1.5227			8.01703	0.689756			8.72684	0.993987
							17.268	0.977743			10.1531	0.822564			13.2115	0.956129
							18.0975	0.997143			14.955	0.989218			3.01612	0.389038
							17.0289	0.950835			5.28694	-1.85817			9.32688	0.99786
							19.9411	0.97482			7.13233	-4.47559			0.530577	-0.00129956
							0.682691	-0.334111			5.21797	-0.903813			13.0464	0.994444
							17.2697	0.99249			10.7473	0.960632			8.69459	0.987652
							19.1044	0.944729			19.7206	0.992115			15.3168	0.994044
							13.3496	0.970357			15.503	0.999651			15.9154	0.992614
							15.8838	0.858913			17.7	0.794436			22.9189	0.992134
							20.5733	0.979224			10.1302	0.912376			3.5235	0.935957
							14.2852	0.995392			20.1612	0.98222			14.9305	0.912978
							13.8914	0.991687			14.6535	-3.34693			7.17386	0.982198
							20.2407	0.993331			13.6263	0.406891			13.3166	0.957307
							12.0476	0.783682			13.7857	0.875296			10.4682	0.977714
							16.4596	0.946483			18.2614	0.911483			6.52366	0.951774
							13.5578	0.971976			5.25375	-3.29158			13.7715	0.937326
							19.754	0.722199			10.5633	-1.11127			14.124	0.99849
							2.38528	0.871843			18.9989	0.820944			8.23191	0.499709
							5.92705	0.976382			6.95723	-12.477			7.40798	0.980152
							17.4747	0.870791			21.5609	0.978895			15.4683	0.675887
							9.52831	0.936062			15.7399	0.708249			5.86671	0.9841
							11.9278	0.994341			12.6926	0.869051			2.74686	0.711023
							17.1717	0.996495			18.6375	0.954242			6.17658	0.913634
							26.8697	0.874763			21.1695	0.770365			6.07761	0.921997
							22.9814	0.912239			21.4482	0.942756			0.753034	-0.234121
							14.7504	0.991983			8.03924	-8.61466			7.39114	0.90131
							18.1288	0.994556			21.5876	0.899869			18.9032	0.948819
							16.2659	0.977935			14.4251	0.982672			10.0724	0.951695
							21.7743	0.90241			7.27613	0.741216			9.38017	0.619936
							24.6899	0.948883			19.149	0.988518			13.4895	0.840745
							14.4649	0.995382			4.72946	0.382995			16.6579	0.988085
							17.8202	0.955749			25.2893	0.953758			12.0537	0.999729
							25.4953	0.957194			20.6272	0.924702			14.1303	0.995147
							8.85414	0.947444			12.0073	0.409104			2.51695	-0.421176
							18.2763	0.978084			9.15522	-0.289974			13.6079	0.988291
							2.98069	-0.661898			25.31	0.896581			16.2117	0.995851
							18.6468	0.668319			15.6157	0.923701			6.70644	0.86817
							0.300162	-0.0148538			22.7398	0.986913			15.1391	0.998655
							1.75135	-2.09478			8.34935	0.78392			10.3102	0.98737
							8.3006	0.682179			18.4318	0.938774			9.87333	0.956501
							16.8812	0.987865			26.5611	0.838755			7.24081	0.907492
							21.8062	0.871756			28.3593	0.765772			9.75569	0.904247
							18.6649	0.996212			24.1914	0.948367			14.3536	0.967972
							18.9119	0.993825			0.694391	-0.387191			14.7652	0.997129
							10.3226	0.883509			10.114	0.824154			5.23518	0.540603
							20.0493	0.928861			22.3615	0.926665			12.8157	0.948267
							20.3468	0.993482			23.6104	0.958188			9.23436	0.892288
							17.3085	0.99223			0.000149843	-0.168178			13.5745	0.954204
							24.0606	0.933867			14.8163	0.851013			9.85771	0.968666
							18.5633	0.986696			10.725	0.265734			13.8168	0.647209
							26.6627	0.941212			14.1506	0.0681718			9.8357	0.998437
							6.39452	0.990205			24.1719	0.770532			9.9769	0.999674
							15.1173	0.821678			20.745	0.980739			15.7727	0.984703
							20.9874	0.81611			1.79046	-4.8352			10.1727	0.988196
							18.2928	0.991058			20.8026	0.86785			7.09155	0.947224
							20.8433	0.900463			0.00832015	-0.00057665			10.7117	0.959284
							14.5577	0.735027			2.05348	-0.564526			13.6955	0.866221
							14.9934	0.983094			17.839	0.982254			13.6862	0.93337
							18.952	0.997085			21.81	0.9155			8.54587	0.969818
							30.9341	0.97898			24.7612	0.979135			13.6159	0.99497
							21.5858	0.96859			2.91622	-1.17693			22.1873	0.989163
							18.7518	0.981923			6.81039	-2.99044			0.00416426	-0.000954782
							13.8361	0.994856			19.4949	0.894302			8.55347	0.981992
							19.6374	0.968668			14.9406	0.993158			9.3693	0.978304
							13.9258	0.997436			7.35221	-3.68599			11.7216	-2.97833
							24.2994	0.993888			25.5966	0.835552			9.73773	0.871492
							16.9257	0.977094			17.8524	0.687354			11.6927	0.985553
							17.3179	0.989766			15.3695	0.890073			12.9968	0.968445
							22.242	0.887941			21.1657	0.812181			11.9008	0.995295
							7.90033	0.895262			15.5923	0.996301			1.87085	-1.24039
							15.1367	0.920094			11.5586	0.935584			14.2693	0.89928
							28.709	-0.740436			21.8001	0.8182			3.38586	0.348145
							20.6368	0.955837			14.7976	0.854453			13.9831	0.998377
							14.3246	0.913583			16.9677	0.977405			9.70552	0.990089
							19.2937	0.985312			18.817	0.860362			13.6618	0.996711
							22.8846	0.984425			10.3458	0.850773			12.6614	0.987361
							2.60815	0.899672			13.2779	0.989337			14.0224	0.994433
							23.5369	0.963015			5.29034	0.600429			8.85861	0.138532
							22.5697	0.990505			19.1313	0.906887			2.86055	-0.366245
							26.3697	0.799313			14.0191	0.473058			8.74372	0.935453
							21.5183	0.735045			18.2593	0.707275			17.6499	0.924544
							20.3583	0.848079			17.6976	0.976787			13.1027	0.996169
							17.4436	0.995563			14.9319	0.986436			14.0091	0.955582
							16.2754	0.943997			11.2732	0.6026			0.000149778	-0.00182424
							3.68384	-1.52742			21.038	0.986013			11.9652	0.991775
							20.8551	0.925959			20.2102	0.976029			9.44612	0.966214
							17.6933	0.910392			26.4971	0.992166			4.99498	0.993132
							19.9504	0.990741			24.4136	0.85865			12.9635	0.982224
							18.9873	0.994475			18.1754	0.984871			11.646	0.954908
							3.84634	0.710097			20.8292	0.964882			21.3336	0.980377
							1.79484	0.480945			21.1493	0.941471			13.1611	0.989212
							3.13305	0.452498			2.38572	-0.647181			12.0183	0.988597
							18.6618	0.868003			17.8151	0.99748			3.46318	0.740488
							33.402	0.961544			19.9597	0.991221			7.81026	0.931318
							10.203	0.936784			28.7034	0.944711			9.87069	0.95068
							15.0691	0.786523			14.3195	0.690307			4.59921	0.26497
							21.7994	0.955778			30.6232	0.883697			11.8146	0.981154
							17.2671	0.984796			24.8058	0.792371			12.6839	0.848395
							21.8392	0.976817			14.2152	0.909435			15.0943	0.981979
							25.2213	0.870147			21.4521	0.979935			11.9421	0.922729
							18.5635	0.997064			17.6798	0.844391			3.78706	0.843265
							18.5325	0.951537			12.794	0.998759			10.3713	0.988193
							19.6529	0.946746			7.52668	-3.73972			12.8265	0.919909
							8.32193	0.801467			13.058	0.86197			2.94414	0.0658171
							13.3319	0.934226			20.5034	0.930114			11.5597	0.988495
							1.25875	-5.75254			17.7436	-0.501042			9.39993	0.959744
							4.63378	0.866542			28.7843	0.925503			16.8346	0.985939
							14.8663	0.754891			26.2817	0.913265			12.7145	0.922911
							17.2406	0.994054			27.3665	0.989781			14.0676	0.99308
							18.6306	0.994058			20.2515	0.946165			8.64679	0.806189
							12.3525	0.993043			22.936	0.976224			5.97154	0.979095
							13.7831	0.997087			11.4777	0.718501			15.4955	0.996074
							20.4745	0.959489			13.1561	0.999392			11.1082	0.71385
							16.2991	0.9742			16.4393	0.987062			1.87547	0.103372
							17.8756	0.95191			16.8835	0.97004			22.3027	0.990073
							17.7125	0.982975			6.40978	0.540386			0.0455536	-0.266152
							2.33031	0.150157			0.000149648	-0.0211526			10.4162	0.995613
							14.7995	0.995864			14.1121	-1.32155			9.86633	0.949822
							21.1024	0.985435			3.76944	-0.523155			2.28383	0.684038
							16.3296	0.995147			22.5783	0.897582			17.8851	0.998765
							14.7376	0.969			20.0071	0.921718			13.4644	0.959063
							20.1519	0.983207			6.78319	-0.751335			20.2566	0.970738
							22.802	0.968191			20.953	0.994021			11.9907	0.615422
							16.0986	0.996906			17.7156	0.967457			11.5274	0.979871
							16.8035	0.8235			14.5689	0.956733			20.4529	0.980285
							25.5049	0.982373			12.7297	0.945325			10.0717	0.848353
							23.624	0.992223			7.772	0.686008			11.5489	0.77473
							19.8434	0.988038			7.80057	0.832584			14.6479	0.997211
							6.31248	0.927235			16.9214	0.787163			9.76856	0.97231
							9.85622	0.517004			20.6886	0.982457			12.0331	0.989404
							20.2562	0.981676			17.6374	0.738466			6.06232	0.760357
							18.7881	0.986223			14.1261	0.948885			15.9444	0.916074
							26.8829	0.957417			17.2043	0.996207			11.5532	0.306812
							21.2735	0.982693			13.6417	0.973968			14.9008	0.911711
							17.822	0.95659			26.9736	0.956024			8.87012	0.995425
							1.2169	-0.424664			16.3669	0.676098			8.13335	0.950473
							17.7478	0.862978			21.2024	0.984543			8.01502	0.920063
							16.8554	0.985609			22.7502	0.867671			10.3802	0.99467
							13.2243	0.996058			16.3676	0.836035			9.52671	0.989089
							18.4705	0.938595			16.9434	0.965669			12.1315	0.576929
							19.5984	0.990529			1.78717	-0.256556			13.8277	0.959762
							16.0696	0.887891			23.3473	0.992496			5.59525	0.463506
							15.2765	0.995962			25.5365	0.951261			12.6228	0.980916
							20.4587	0.953632			17.1874	0.985563			10.5755	0.832143
							18.8103	0.735463			25.9922	0.976135			12.9147	0.99876
							17.1228	0.796738			13.1152	0.9571			9.62156	0.94788
							0.887168	-0.305151			29.1884	0.789089			6.72639	0.858686
							14.0178	0.969274			25.1558	0.779437			11.2311	0.983673
							16.1961	0.984117			9.49727	0.915442			17.5375	0.997076
							28.8188	0.890925			19.5665	0.983413			13.4095	0.99839
							21.5527	0.977125			3.41943	-1.16817			4.91737	-0.446164
							20.8548	0.974366			22.5579	0.988986			12.1473	0.924799
							3.87294	0.914236			18.0623	0.893583			1.57753	-1.74172
							18.305	0.950689			19.1947	0.955732			14.3708	0.993647
							10.8031	0.993941			21.9811	0.781017			4.57966	0.704812
							17.6439	0.939616			19.3212	0.984			13.507	0.967197
							17.5073	0.975239			10.9521	0.948765			12.035	0.962082
							20.4396	0.987584			15.1508	0.977839			12.5222	0.97112
							16.9277	0.979279			5.81574	0.972024			2.21477	-1.3195
							14.1122	0.161349			25.6783	0.96009			9.45092	0.886893
							13.4889	0.989523			15.2475	0.701845			2.22795	-1.22288
							20.7508	0.966185			2.50768	-0.0221639			12.1057	0.941742
							19.9783	0.986015			23.0417	0.97697			12.7244	0.919301
							2.38642	0.586513			20.8957	0.996999			12.008	0.980066
							0.000149057	-0.0739568			22.8057	0.908843			13.3448	0.966125
							15.3082	0.993378			14.8774	0.991346			11.4567	0.977371
							19.8648	0.933735			11.5827	0.993942			11.0911	0.998817
							14.2747	0.990094			20.5366	0.969923			13.5308	0.99907
							19.8353	0.98995			22.2071	0.988449			1.00125	-0.0426002
							17.225	0.939335			28.2386	0.578219			10.3685	0.980823
							10.1705	0.876848			18.5969	0.975476			18.9194	0.824994
							7.43459	0.974299			10.0125	-0.0964041			5.71526	0.874124
							13.734	0.982672			14.0402	0.861934			3.34792	0.341809
							12.4156	0.964983			22.4782	0.865753			6.89086	0.67427
							19.5278	0.940939			15.5369	0.780369			14.2081	0.993422
							25.0532	0.987811			9.45165	-4.97071			11.8949	0.956834
							21.797	0.992136			9.3956	0.926819			19.28	0.978425
							17.5527	0.975566			1.92867	0.165471			14.5795	0.975363
							21.6896	0.966612			7.91769	-1.26132			16.1519	0.927838
							0.000149604	-0.0828627			30.7993	0.853933			20.2451	0.967451
							19.4243	0.936111			26.5557	0.766945			17.8233	0.990304
							22.0373	0.929574			21.0669	0.981363			12.6711	0.211522
							0.917366	-5.37974			18.2914	0.996232			11.6786	0.99845
							18.3612	0.971422			10.4741	0.964887			15.9828	0.994322
							18.9408	0.940603			20.2142	0.992579			6.27363	0.863844
							31.5697	-0.0613305			17.8514	0.928551			6.42043	0.993175
							17.9006	0.978296			24.4125	0.976763			4.30524	0.99385
							18.0496	0.996555			20.0469	0.996872			22.3203	0.992507
							17.6509	0.976442			19.4958	0.972101			16.3754	0.981116
							18.9483	0.966433			13.7277	0.812564			20.0372	0.955318
							2.46033	0.0240458			19.9518	0.854274			13.5149	0.990863
							4.11988	0.975818			19.7196	0.990644			5.4791	0.635292
							19.2001	0.996136			17.8111	0.98035			21.3639	0.992894
							1.81369	-0.674701			18.9896	0.936121			23.7019	0.805532
							19.544	0.968772			18.3933	0.960978			9.73961	0.975285
							1.16402	0.638747			13.0976	-0.646598			4.00718	0.80244
							24.3759	0.965256			14.8086	0.98273			7.44874	-0.999182
							0.759188	-1.32156			18.7122	0.653963			21.1348	0.90337
							16.5395	0.888952			23.3799	0.977656			17.6753	0.987303
							2.49433	-2.21743			19.4652	0.609536			3.67338	0.549839
							24.0445	0.920157			1.30824	-4.96767			11.7652	0.997636
							1.96928	0.0958346			20.4897	0.969098			19.7587	0.992732
							23.2023	0.985487			22.732	0.866937			20.1338	0.994097
							19.8316	0.986327			22.3443	0.864931			19.3201	0.783957
							0.529993	-0.0169917			21.6749	0.986924
							18.2734	0.992682			19.6299	0.934064
							16.9964	0.86529			19.8511	0.987522
							0.471467	-0.443158			9.25968	0.996268
							23.5457	0.937528			23.0536	0.850642
							2.50254	-4.32642			25.2938	0.986214
							18.1911	0.992105			19.9883	0.949086
							17.8846	0.980752			18.7587	0.985321
							19.8069	0.991105			27.9485	0.883987
							18.0042	0.897378			13.5771	0.469102
							19.5297	0.959398			22.6358	0.8659
							0.556185	-0.603728			18.6367	0.985101
							22.3463	0.985755			3.02629	0.848887
							1.50152	-0.129931			19.3796	0.997565
							2.41284	-3.81905			14.2882	0.836163
							12.2332	0.986011			23.0457	0.979086
							13.9533	0.983326			24.2744	0.983234
							19.0323	0.93588			14.8192	0.996892
							20.0951	0.939216			21.7166	0.990044
							22.7325	0.918435			22.8154	0.893885
							26.9853	0.960508			11.2561	0.912494
							5.2238	0.540003			11.8097	0.983571
							9.44756	0.909939			6.63617	-2.96132
							7.75394	0.777508			14.0234	0.584545
							17.8296	0.979136			12.7586	0.761662
							20.0589	0.971016			10.1773	0.972723
							16.016	0.887038			9.59182	0.978103
							18.4347	0.982831			16.2541	0.815261
							17.3549	0.766469			3.12097	-0.316581
							14.0377	0.996802			8.0754	-0.748837
							19.1368	0.983697			14.1641	0.973228
							19.1906	0.979906			11.0748	-1.07137
							16.81	0.621031			7.29483	0.291741
							12.8656	0.99283			0.00864537	-0.00581146
							19.4962	0.866112			11.8439	0.985017
							17.598	0.995407			5.25391	0.561989
							18.3303	0.975131			2.09246	-0.671064
							14.8997	0.870646			5.50177	-3.34762
							23.2949	0.841874			7.84735	-0.781539
							22.6963	0.98416			14.1705	0.678788
							20.7895	0.825291			17.0162	0.722834
							21.3651	0.974938			11.6353	-0.642664
							15.2579	0.992895			11.1006	0.831501
							26.473	0.973891			14.7817	-0.305029
							18.0191	0.944275			13.8793	-0.778123
							18.9843	0.845662			5.58718	-0.502124
							4.64836	-2.54179			5.79946	0.603905
							18.4386	0.976544			15.7919	0.994943
							18.5551	0.99144			9.25149	0.992507
							19.8166	0.992701			14.0986	0.943003
							23.0782	0.915579			6.99546	0.826957
							20.9977	0.948395			9.25831	0.392615
							17.9938	0.901766			16.2476	-0.863012
							9.45033	0.708992			5.20793	0.793923
							21.6079	0.978098			0.487549	-0.200341
							19.1185	0.993162			0.00310325	-0.0030304
							19.0686	0.923323			13.0957	0.0112887
							20.6969	0.945216			4.86723	-439.566
							3.49474	0.983651			22.8561	0.956134
							18.4194	0.96072			1.30908	-0.236117
							18.0861	0.973825			14.2295	0.931479
							22.8428	0.93469			9.26097	0.705869
							19.6781	0.829203			10.393	0.900281
							11.3096	0.974195			4.77089	-0.771532
							21.9792	0.875527			10.9031	0.88095
							2.15803	-0.959673			9.08163	-9.6686
							25.9514	0.938794			0.000149012	-0.231684
							19.5052	0.944342			6.98293	-4.49449
							15.9072	0.980176			7.30444	0.682151
							16.9879	0.986952			0.158114	-0.645432
							17.8872	0.697601			8.41323	-0.837213
							15.6734	0.981574			2.27902	0.0823527
							17.9724	0.980409			14.2074	0.942384
							21.1897	0.983622			17.7441	0.651342
							21.7534	0.985762			1.30786	-0.487673
							15.904	0.981556			2.29323	0.0834879
							17.8244	0.911604			14.5087	0.705809
							3.16228	-0.419412			1.42533	-0.800935
							15.6267	0.981805			8.63446	0.83282
							20.4988	0.922437			3.13585	-0.468594
							16.1915	0.984249			7.69819	0.959368
							14.4741	0.817426			16.9317	-1.30971
							14.4133	0.99476			3.62008	-0.951794
							18.2105	0.981244			10.051	-1.29076
							1.74612	-15.7129			14.428	-1.84566
							22.0386	0.938331			14.0927	0.955658
							16.5922	0.357499			18.4247	0.985083
							14.7027	0.99879			7.50447	0.551965
							8.14809	-1.04528			3.49784	-2.292
							17.4063	0.983731			2.92503	0.436924
							21.191	0.995239			8.62416	-0.282367
							20.5184	0.932312			21.8101	0.953695
							21.6052	0.984326			8.43183	0.562214
							9.62539	-0.150409			12.4015	0.38702
							21.9583	0.992973			14.4085	0.770769
							12.9039	-0.0877863			16.8479	0.833778
[truncated: 1,003 more rows]
