# Supplementary material for: The transpeptidase PBP2 governs initial localization and activity of the major cell-wall synthesis machinery in E. coli
Source: eLife. 2020 Feb 20;9:e50629. doi: 10.7554/eLife.50629 (PMC7089770; doi:10.7554/eLife.50629)
Supplement: Figure 2—source data 1. — The file Dataset-Fig2.xlsx contains: Figure 2B Values of switching rates of PAmCherry-PBP2 and msfGFP-PBP2 tracks from low frequency imaging and number of tracks considered. Figure 2C Values of histogram counts of track lengths of msfGFP-PBP2 tracks for lifetime measurements. [file elife-50629-fig2-data1.xlsx]

## Sheet: Panel B
Rate of switching form persistent to immobile [1/s]
Strain	Replicate 1	Replicate 2	Replicate 3	Averages
TKL130	0.0167	0.0207	0.0182	0.0185333
Overexpression	0.0276	0.0298	0.0132	0.0235333
AV127	0.015	0.012	0.013	0.0133333
TU230-5uM IPTG	0.0170068	0.00365177	0.00886525	0.00984127
TU230-15uM IPTG	0.025	0.009	0.007	0.0136667
TU230-25uM IPTG	0.00524109	0.00423012	0.0163837	0.00861829
TU230-L61R-25uM IPTG	0.0329121	0.03367	0.0269687	0.0311836
Rate of switching form immobile to persistent [1/s]
Strain	Replicate 1	Replicate 2	Replicate 3	Averages
TKL130	0.0046	0.0203	0.0176	0.0141667
Overexpression	0.0144	0.0156	0.0146	0.0148667
AV127	0.033	0.041	0.025	0.033
TU230-5uM IPTG	0.0480769	0.0647452	0.0724638	0.061762
TU230-15uM IPTG	0.048	0.035	0.043	0.042
TU230-25uM IPTG	0.0378788	0.0925926	0.0587173	0.0630629
TU230-L61R-25uM IPTG	0.0290867	0.0211721	0.0351617	0.0284735
Number of tracks
Strain	Replicate 1	Replicate 2	Replicate 3
TKL130	109	83	99
Overexpression	107	70	49
AV127	502	776	741
TU230-5uM IPTG	98	359	40
TU230-15uM IPTG	569	458	280
TU230-25uM IPTG	95	67	151
TU230-L61R-25uM IPTG	125	163	196

## Sheet: Panel C
Values for lifetime distribution
time interval = 1 second
Number of steps	3	4	5	6	7
Replicate 1, histogram counts	80	57	32	25	16
Replicate 2, histogram counts	129	66	47	27	12
Replicate 3, histogram counts	164	76	49	17	19
time interval = 12 second
Number of steps	3	4	5	6	7
Replicate 1, histogram counts	367	146	71	27	9
Replicate 2, histogram counts	140	51	33	10	4
Replicate 3, histogram counts	59	17	12	1	1
Number of tracks
Condition	Replicate 1	Replicate 2	Replicate 3
time interval = 1 second	210	281	325
time interval = 12 second	620	238	90
