# Supplementary material for: The transpeptidase PBP2 governs initial localization and activity of the major cell-wall synthesis machinery in E. coli
Source: eLife. 2020 Feb 20;9:e50629. doi: 10.7554/eLife.50629 (PMC7089770; doi:10.7554/eLife.50629)
Supplement: Figure 3—source data 1. — The file Dataset-Fig3.xlsx contains: Figure 3C-D. Numerical values of the distribution of peak intensities, average peak density, pixel noise and number of cells considered for untreated and A22-treated cells carrying either mCherry-PBP2, MreB-msfGFP, or GFP-RodZ fusion. Figure 3E Number of tracks, average diffusion constants, and bound fractions from high frequency imaging for non-treated, A22- and Mecillinam- treated cells from TKL130, including p-values for bound fractions and diffusion constants. Figure 3F Number of tracks and persistent fractions from low frequency imaging for non-treated, A22- and Mecillinam- treated cells from TKL130, including p-values for persistent fractions. Figure 3—figure supplement 2 Numerical values of the distribution of peak intensities, average peak density, pixel noise and number of cells considered for untreated and A22-treated cells carrying either mCherry-PBP2, MreB-msfGFP, or GFP-RodZ fusion. Figure 3—figure supplement 3 Number of tracks, average diffusion constants, and bound fractions from high frequency imaging for non-treated and A22-treated cells from AV127, including p-values for bound fractions and diffusion constants. Figure 3—figure supplement 4 Width, length and doubling time from OD600 measurements for non-treated, A22- treated and Mecillinam- treated cells from TKL130. [file elife-50629-fig3-data1.xlsx]

## Sheet: Panel C-D
Panel C: Distribution of normalized peak intensities
for MreB	Intensity values -bin center-	untreated	A22 treated (20 ug/ml)	A22 treated (50 ug/ml)		Pixel noise limit			untreated	A22 treated (20 ug/ml)	A22 treated (50 ug/ml)
	0.222222	0.495501	0.621176	1.06076		0.89562		Number of cells	263	161	168
	0.666667	0.430949	0.399113	0.391643
	1.11111	0.378217	0.256573	0.210996
	1.55556	0.296391	0.183052	0.111279
	2	0.200019	0.14104	0.0794847
	2.44444	0.123648	0.103529	0.0563618
	2.88889	0.0718249	0.081023	0.0361294
	3.33333	0.0318211	0.0390111	0.0289035
	3.77778	0.0227294	0.0240068	0.0130066
for RodZ	Intensity values -bin center-	untreated	A22 treated (50 ug/ml)			Pixel noise limit			untreated	A22 treated (50 ug/ml)
	0.222222	0.7765	1.2599			1.4736		Number of cells	142	144
	0.666667	0.5947	0.9018
	1.11111	0.4536	0.5006
	1.55556	0.3296	0.2835
	2	0.226	0.1757
	2.44444	0.1512	0.0928
	2.88889	0.1087	0.0381
	3.33333	0.1002	0.0431
	3.77778	0.0629	0.0232
for PBP2	Intensity values -bin center-	untreated	A22 treated (50 ug/ml)			Pixel noise limit			untreated	A22 treated (50 ug/ml)
	0.222222	0.804779	0.941673			1.3782		Number of cells	149	166
	0.666667	0.600704	0.719527
	1.11111	0.45094	0.498779
	1.55556	0.375235	0.367448
	2	0.235344	0.269648
	2.44444	0.190909	0.15648
	2.88889	0.118495	0.124346
	3.33333	0.105329	0.0922113
	3.77778	0.0691221	0.0433114
Panel D: Values for average peak densities
For MreB
untreated	1.11556
A22 treated (20 ug/ml)	0.826735
A22 treated (50 ug/ml)	0.53616
For RodZ
untreated	0.858
A22 treated (50 ug/ml)	0.5421
For PBP2
untreated	1.05494
A22 treated (50 ug/ml)	1.00734

## Sheet: Panel E-F
Panel E: fast tracking
Condition	treatment time [min]	Number of tracks	D [um^2/s]	p-value of D*	Bound fraction [%]	p-value of bound fraction*
untreated	0	912	0.0402447		21.8787
	0	2228	0.0400533		18.2863
	0	826	0.0472511		25.7848
	0	1724	0.0386303		19.7958
	0	2538	0.0411262		22.4749
	0	1861	0.0472609		23.8523
A22 treatment
with 20 ug/ml	10	1226	0.0457763		14.455
	10	1003	0.0488939		20.0685
	10	2337	0.0457997	0.107754	15.1356	0.0287549
	30	632	0.0500865		19.8145
	30	506	0.044377		18.6542
	30	566	0.0438971		21.6491
	30	514	0.0456771	0.149715	16.0626	0.112148
	120	773	0.0293602		29.7687
	120	1453	0.0276517		17.1982
	120	2172	0.0309808	0.000883448	24.3069	0.563495
with 50ug/ml	30	251	0.0448787		11.2507
	30	237	0.0431293		18.749
	30	395	0.0412588	0.789686	14.0251	0.0115215
Mecillinam treatment
with 100ug/ml	10	3544	0.0334584		21.6509
	10	3138	0.032402		18.6513
	10	1390	0.0369611	0.0127944	17.4223	0.170676
	30	4448	0.0385934		21.261
	30	2430	0.0382226		22.5753
	30	1498	0.0419609	0.13906	18.1287	0.483346
	120	2872	0.025318		31.2461
	120	1797	0.026807		28.3239
	120	2001	0.0185946	0.0113567	33.9734	0.00213273
Panel F: slow tracking
Condition	treatment time [min]	Number of tracks	Persistent fraction [%]	p-value persistent fraction*
untreated	0	109	42.0886
	0	83	43.318
	0	99	41.2162
A22 treatment	30	34	3.61446
with 20 ug/ml	30	30	10.2273	0.000852553
Mecillinam treatment	30	57	2.81
with 100 ug/ml	30	25	12.5
	30	18	1.92	0.000449575

## Sheet: SI 2
Panel B: Distribution of normalized peak intensities
		for MreB		for PBP2		for RodZ
	Intensity values -bin center-	untreated	A22 treated	untreated	A22 treated	untreated	A22 treated				Number of cells	Pixel noise limit
	0.1	1.70598	3.79843	4.92322	2.45321	1.95241	5.0521		for MreB	untreated	164	0.74
	0.3	1.69873	3.36153	2.15436	2.08292	1.9248	2.94808		for MreB	A22 treated	84	-
	0.5	1.65523	2.31298	1.6483	2.04985	1.41599	1.91645		for PBP2	untreated	65	0.8
	0.7	1.6214	1.9943	1.33744	1.72585	1.23456	1.28443		for PBP2	A22 treated	85	-
	0.9	1.51025	1.12051	1.04826	1.42167	1.03734	0.844056		for RodZ	untreated	116	0.75
	1.1	1.33385	0.740154	1.01212	1.12411	0.911126	0.66872		for RodZ	A22 treated	115	-
	1.3	1.06563	0.580815	0.788004	1.00509	0.784909	0.583092
	1.5	1.02697	0.313537	0.759086	0.899291	0.761243	0.407756
	1.7	0.84574	0.251858	0.636187	0.780267	0.607417	0.330283
	1.9	0.679008	0.164479	0.628957	0.641406	0.678414	0.240576
	2.1	0.548523	0.169619	0.498828	0.403358	0.461479	0.187568
	2.3	0.454283	0.149059	0.412076	0.443033	0.366817	0.126404
	2.5	0.340712	0.0462596	0.267488	0.290947	0.244545	0.122327
	2.7	0.299633	0.0359797	0.332552	0.29756	0.264266	0.0611635
	2.9	0.248889	0.0359797	0.310864	0.204985	0.236656	0.0693186
	3.1	0.166732	0	0.245799	0.178536	0.177492	0.0489308
	3.3	0.157066	0.0154199	0.231341	0.145474	0.189325	0.0570859
	3.5	0.0894068	0.0102799	0.151817	0.138861	0.169603	0.0407756
	3.7	0.0869904	0	0.144588	0.152086	0.173548	0.0570859
	3.9	0.0531608	0.0102799	0.144588	0.0793492	0.149882	0.0244654
Panel C: Values for average peak densities
	untreated	A22 treated
For MreB	0.6078	0.2734
For PBP2	0.4438	0.509
For RodZ	0.5676	0.2806

## Sheet: SI 3
AV127 cells
		D0	D1	D2	F0	F1	F2	number of tracks	chi2	p-value of bound fraction*
untreated	Replicate 1	0	0.00701314	0.0324997	36.5397	23.2215	40.2388	2369	0.0548026
	Replicate 2	0	0.00672696	0.0351414	43.764	17.6766	38.5594	1232	0.0470942
	Replicate 3	0	0.0039304	0.0294116	38.4458	15.3711	46.1831	1218	0.0429608
	Replicate 4	0	0.00601757	0.0306364	31.214	16.3946	52.3914	437	0.0924699
	Replicate 5	0	0.00578791	0.0313575	32.4536	21.1709	46.3755	444	0.0952824
A22 treated (50 ug/ml)	Replicate 1	0	0.00240792	0.0375579	51.5079	24.4406	24.0515	1237	0.192274
	Replicate 2	0	0.00421352	0.0402828	51.5921	14.9933	33.4146	1091	0.05523
										0.0102285
* p-value calculated according to two-lobed t-test between treated and non-treated conditions

## Sheet: SI 4
		A22 treatment	Mecillinam treatment			Width [um]
	time [min]	OD600	OD600			Replicate 1	Replicate 2
	0	0.008	0.008		untreated	1.05	1.09
	45	0.018	0.015		A22 treatment	1.22
	100	0.022	0.019		Mecillinam treatment	1.21	1.22
	153	0.039	0.035
	200	0.061	0.056
	310	0.199	0.125
	389	0.425	0.157			Length [um]
	441	0.722	0.168			Replicate 1	Replicate 2
					untreated	3.33	3.47
					A22 treatment	2.64
					Mecillinam treatment	2.51	2.48
