# Supplementary material for: The transpeptidase PBP2 governs initial localization and activity of the major cell-wall synthesis machinery in E. coli
Source: eLife. 2020 Feb 20;9:e50629. doi: 10.7554/eLife.50629 (PMC7089770; doi:10.7554/eLife.50629)
Supplement: Figure 4—source data 1. — The file Dataset-Fig4.xlsx contains: Figure 4B Number of tracks and bound fractions from Bound-molecule-FRAP measurements at different time lags with A22-treated cells from TKL130. Figure 4C Values of histogram counts of track lengths of msfGFP-PBP2 tracks from A22-treated cells for lifetime measurements. Figure 4—figure supplement 1 Number of tracks and bound fractions from bound-molecule-FRAP measurements at different time lags with non-treated cells from TKL130. [file elife-50629-fig4-data1.xlsx]

## Sheet: Panel B
FRAP measurements
time point [min]	Number of tracks	Bound fraction [%]
reference	632	19.8145
reference	506	18.6542
reference	566	21.6491
reference	514	16.0626
0	955	12.4347
0	888	9.21961
0	748	10.4256
3	711	14.8827
3	693	14.0853
3	849	16.2827
5	1221	15.5432
5	1452	19.6775
5	1933	16.801
10	466	22.4548
10	498	16.1153
10	2412	17.3181

## Sheet: Panel C
Values for lifetime distribution
histogram counts for time interval = 1 second
Number of steps	3	4	5	6	7
Replicate 1	399	208	140	81	66
Replicate 2	350	194	121	73	68
Replicate 3	667	297	139	98	34
Replicate 4	453	234	130	101	70
histogram counts for time interval = 12 second
Number of steps	3	4	5	6	7
Replicate 1	177	81	37	22	8
Replicate 2	475	196	93	50	25
Replicate 3	193	81	22	15	15
Replicate 4	356	182	76	38	25
Number of tracks
Condition	Replicate 1	Replicate 2	Replicate 3	Replicate 4
time interval = 1 second	894	806	1235	988
time interval = 12 second	325	839	326	677

## Sheet: SI 1
	FRAP measurements
	time point [min]	Number of tracks	Bound fraction [%]
	reference	912	21.8787
	reference	2228	18.2863
	reference	826	25.7848
	reference	1724	19.7958
	reference	2538	22.4749
	reference	1861	23.8523
	0	784	13.9517
	0	698	8.08056
	0	2767	9.90502
	3	1750	10.7953
	3	1265	14.4531
	3	1548	13.9728
	3	1475	7.72027
	10	2429	12.0998
	10	2219	14.0532
	10	1681	12.2563
