# Supplementary material for: The transpeptidase PBP2 governs initial localization and activity of the major cell-wall synthesis machinery in E. coli
Source: eLife. 2020 Feb 20;9:e50629. doi: 10.7554/eLife.50629 (PMC7089770; doi:10.7554/eLife.50629)
Supplement: Figure 5—source data 1. — The file Dataset-Fig5.xlsx contains: Figure 5C Number of tracks, average diffusion constants and bound fractions of PAmCherry-PBP2 tracks from high frequency imaging during depletion of Rod-complex components, including p-values for bound fractions and diffusion constants. Figure 5D Number of tracks and persistent fractions of PAmCherry-PBP2 tracks from low frequency imaging during depletion of Rod-complex components, including p-values for persistent fractions. Figure 5—figure supplement 1 OD600 measurements during depletion of Rod-complex components. Figure 5—figure supplement 2A-B Shape measurements during depletion of Rod-complex components. Figure 5—figure supplement 2C-D Mass spectrometry measurements (DIA method) of MreC, RodA, RodZ, and PBP2 during depletion of Rod-complex components. Protein levels are normalized by the mean of the corresponding protein level in MG1655. Figure 5—figure supplement 2E see data for Figure 5C. Figure 5—figure supplement 2F Number of tracks, average diffusion constants, and bound fractions of PAmCherry-PBP2 tracks from high frequency imaging at different times of RodZ depletion, including p-values for diffusion constants and bound fractions. Figure 5—figure supplement 3D Pearson correlation coefficients between (i) mCherry-PBP2 and GFP-RodZ or (ii) MreB-mCherry and GFP-RodZ signals for each cell. [file elife-50629-fig5-data1.xlsx]

## Sheet: Panel C-D
Panel C:
	Number of tracks	Avg diffusion constant	p-value Diffusion constant*	Bound fraction [%]	p-value Bound fraction*
TKL130	912	0.0402447		21.8787
	2228	0.0400533		18.2863
	826	0.0472511		25.7848
	1724	0.0386303		19.7958
	2538	0.0411262		22.4749
	1861	0.0472609		23.8523
RodA	10563	0.0299569		19.6235
	7179	0.0350278		15.7667
	4581	0.0302366		16.7336
RodA repression 9h	2188	0.031144		14.651
	4216	0.0245473		18.5308
	3614	0.0206636	0.14447	24.4946	0.581252
MreCD +50uM IPTG	3287	0.0399002		14.7732
	1807	0.0363689		20.3819
	922	0.0411504		20.2262
MreCD depletion 6h	4267	0.0278896		17.1766
	2492	0.018313		16.8774
	2738	0.033009	0.0485083	13.4203	0.297636
RodZ +100uM IPTG	2180	0.030706		27.2544
	1994	0.0443801		40.8481
	1148	0.0356625		27.4829
	2269	0.036313		24.5024
	3298	0.0301241		38.3198
RodZ depletion 6h	3827	0.025755		10.4403
	1236	0.030992		11.9191
	1399	0.0272459		25.3955
	5414	0.013931		12.4178
	926	0.0165721	0.016525	7.13852	0.00386866
ΔponA	686	0.0423894		15.3553
	773	0.0432315		9.91368
	1671	0.041238	0.953032	12.5659	0.00174617
Panel D:
	Number of tracks	Persistent fraction [%]	p-value Persistent fraction*
TKL130	109	42.0886
	83	43.318
	99	41.2162
RodA	99	51.261
	38	40.385
	49	51.695
RodA repression 9h	154	32.82
	180	30.41
	47	16.8	0.0273142
MreCD +50uM IPTG	61	39.66
	108	26.42
	70	43.08
MreCD depletion 6h	27	27.5
	63	10.8
	20	25.81	0.110449
RodZ +100uM IPTG	43	61.24
	53	45.283
	23	62.903
RodZ depletion 6h	117	44.512
	71	20.106
	29	52.941	0.201883
ΔponA	34	32.26
	107	46.86
	100	39.13	0.54822
* p-value calculated according to two-lobed t-test between treated and non-treated conditions

## Sheet: SI 1
Doubling times from OD600 measurements
	RodA native	RodA repression	MreCD induction	MreCD depletion	RodZ induction	RodZ depletion	TKL130
Replicate 1	89.125	96.646	70.74	82.915	71.698	83.459	70.169
Replicate 2	87.063	99.25	74.508	92.638	74.732	77.686	68.262
Replicate 3	91.281	85.128	69.463	85.68	72.037	81.827	73.862

## Sheet: SI 2
Panels A-B		TKL130	TKL130/pKC128	MreCD induction	MreCD depletion (3h)	MreCD depletion (6h)	RodA induction	RodA depletion (5h)	RodA depletion (9h)	RodZ induction	RodZ depletion (4h)	RodZ depletion (12h)
	Width [um]	1.039	1.066	1.09978	1.10752	1.21383	1.1108	1.13499	1.25465	1.12271	1.17022	1.38144
	Length [um]	3.202	2.891	3.2678	3.04062	2.82837	5.17066	4.62769	3.48527	3.1287	2.98704	2.78026
Panels C-D
Mass spectrometry measurements	Normalized protein amounts (normalized with respect to levels in the WT)
		MreC induction	MreC depletion (6h)	RodA native	RodA repression (9h)	RodZ induction	RodZ depletion (6h)	RodZ depletion (9h)
	Replicate 1	3.00867	0.461125	1.32807	Not detected	1.78007	0.0773305	0.100992
	Replicate 2	8.13389	0.436134	1.6639	Not detected	2.01161	0.083887	0.0808854
	Normalized PBP2 amounts (normalized with respect to levels in the WT)
		Replicate 1	Replicate 2	Replicate 3	Averages
	MG1655	0.973447	0.882634	1.14392	1
	TKL130	1.50717	1.62825	1.64418	1.5932
	TKL130/pKC128	8.74031	8.12693	10.5597	9.14233
	RodA native	8.77698	9.00435	-	8.89066
	RodA repression (9h)	6.08107	5.42839	-	5.75473
	MreC induction	1.51304	1.75541	-	1.63422
	MreC depletion (6h)	1.61468	1.79754	-	1.70611
	RodZ induction	1.40665	1.40202	-	1.40434
	RodZ depletion (6h)	1.74883	1.49232	-	1.62058
	RodZ depletion (9h)	1.35561	1.08322	-	1.21941

## Sheet: SI 2, panel F
	time [h]	Number of tracks	Avg diffusion constant [um^2/s]	p-value Diffusion constant*	Bound fraction [%]	p-value Bound fraction*
	0	2180	0.030706		27.2544
	0	1994	0.0443801		40.8481
	0	1148	0.0356625		27.4829
	0	2269	0.036313		24.5024
	0	3298	0.0301241		38.3198
	2	4847	0.0372601		12.2722
	2	6814	0.0265259		7.74661
	2	3996	0.0259499		7.32288
	2	6831	0.0304742		8.48732
	2	5251	0.0291608	0.126996	10.318	0.000175084
	4	684	0.0260906		15.9432
	4	4123	0.0199345		8.08992
	4	3763	0.0227637		13.0305
	4	3663	0.021037	0.00436075	12.3399	0.001883
	6	3827	0.025755		10.4403
	6	1236	0.030992		11.9191
	6	1399	0.0272459		25.3955
	6	5414	0.013931		12.4178
	6	926	0.0165721	0.016525	7.13852	0.00386866
	8	7866	0.012637		15.892
	8	4753	0.0111831		17.1693
	8	2117	0.0115122	0.000460592	19.5525	0.0192864
	10	943	0.013711		24.148
	10	3674	0.0112937	0.00322184	20.1725	0.150393
	12	1554	0.0114656		15.4542
	12	6375	0.012151		39.6034
	12	5014	0.0141976	0.000591102	21.4257	0.403467
* p-value calculated according to two-lobed t-test with respect to t=0

## Sheet: SI 3
Panel B				Panel D
Pearson Correlation coefficients
Cell ID	PBP2-RodZ	MreB-RodZ		Cell ID	PBP2-RodZ	MreB-RodZ
1	0.343458	0.861086		1	0.0734928	0.685947
2	-0.355296	0.765521		2	0.4325	0.62403
3	0.680834	0.856028		3	0.6949	0.718344
4	0.637908	0.90619		4	0.865677	0.760215
5	0.435439	0.874105		5	0.11099	0.810171
6	0.515789	0.936703		6	0.744417	0.897039
7	-0.615	0.934083		7	0.54684	0.54342
8	0.281784	0.833666		8	0.430052	0.927803
9	0.323094	0.899173		9	0.656499	0.728928
10	0.442688	0.759691		10	0.840609	0.451121
11	0.14363	0.866658		11	0.292446	0.896474
12	0.676636	0.90802		12	0.805214	0.756269
13	0.475416	0.85814		13	0.0969783	0.841199
14	0.650295	0.859402		14	0.408401	0.783342
15	0.670017	0.882131		15	-0.338807	0.650092
16	0.598529	0.899662		16	0.213842	0.860819
17	0.582869	0.914365		17	0.345305	0.772051
18	0.431804	0.921029		18	0.461447	0.719964
19	0.348001	0.860822		19	-0.115034	0.672564
20	0.664943	0.625874		20	0.0825434	0.374276
21	0.580884	0.831101		21	-0.27481	0.450804
22	0.354948	0.899504		22	0.376446	0.744561
23	0.130396	0.945488		23	0.615937	0.780684
24	0.531749	0.899212		24	0.348644	0.823127
25	0.555031	0.772826		25	0.699194	0.595151
26	0.111219	0.955571		26	0.631152	0.855138
27	0.267351	0.940519		27	0.190579	0.711075
28	0.697576	0.852599		28	0.798049	0.556871
29	0.468077	0.878063		29	0.622244	0.866913
30	0.095555	0.91018		30	0.154675	0.722083
31	0.506795	0.834976		31	0.467149	0.695982
32	0.662722	0.723077		32	0.713717	0.822203
33	-0.0275831	0.893794		33	0.729704	0.585037
34	-0.147866	0.899364		34	0.541809	0.46302
35	0.627951	0.945699		35	0.491558	-0.00381364
36	-0.0142319	0.928439		36	0.575329	0.809282
37	0.525738	0.932801		37	0.388665	0.640458
38	0.460379	0.88896		38	0.304285	0.414753
39	0.743802	0.909294		39	-0.0154095	0.898772
40	0.233435	0.917656		40	0.529836	0.76092
41	-0.110732	0.817418		41	0.33758	0.837212
42	-0.00147159	0.930678		42	0.82211	0.774197
43	0.626925	0.873026		43	0.819839	0.720553
44	0.516269	0.877784		44	0.477411	0.574089
45	0.232161	0.857071		45	0.717595	0.720308
46	0.510267	0.907239		46	-0.0942626	0.599359
47	0.487485	0.903954		47	0.486023	0.584999
48	0.0315827	0.769239		48	-0.0660673	0.947556
49	0.314118	0.825531		49	-0.230322	0.422135
50	-0.168435	0.873672		50	0.0368109	0.740006
51	0.490363	0.920993		51	-0.143857	0.810452
52	0.143295	0.904238		52	0.0366614	0.753827
53	0.236178	0.89246		53	0.331438	0.629318
54	0.319468	0.954218		54	0.5283	-0.0767202
55	0.271737	0.946529		55	0.795602	0.722976
56	0.503021	0.847887		56	-0.292252	0.559986
57	0.221636	0.954104		57	0.779841	0.634164
58	0.293985	0.931908		58	0.761586	0.854816
59	-0.0061049	0.836908		59	0.347539	0.666451
60	0.50421	0.858401		60	-0.185559	0.221735
61	0.188185	0.93705		61	0.161511	0.919207
62	0.300737	0.897988		62	-0.0395804	0.721663
63	-0.36883	0.814091		63	-0.306038	0.662607
64	0.241617	0.924893		64	0.265989	0.72487
65	0.297894	0.765318		65	-0.100522	0.41988
66	0.538225	0.811373		66	0.701465	0.896957
67	0.159898	0.703758		67	-0.214003	0.799524
68	0.612814	0.904827		68	0.638465	0.706419
69	-0.25307	0.846257		69	0.287536	0.606166
70	0.367041	0.791757		70	0.530492	0.418632
71	0.326903	0.918066		71	0.532865	0.863546
72	0.319191	0.835006		72	0.176053	0.673436
73	0.365778	0.961155		73	0.284954	0.855249
74	0.288985	0.898367		74	0.326025	0.469046
75	-0.0622887	0.937585		75	0.257129	0.680096
76	0.669927	0.809407		76	0.773738	0.691483
77	0.407067	0.915779		77	0.651086	0.735038
78	0.74868	0.930611		78	-0.474055	0.868005
79	0.519942	0.93774		79	0.541727	0.488566
80	0.899433	0.888538		80	-0.024839	0.594483
81	0.746516	0.768513		81	0.83529	0.809788
82	0.566896	0.721392		82	-0.162385	0.446782
83	0.348193	0.901802		83	0.569399	0.643222
84	0.317913	0.866881		84	0.373697	0.576593
85	0.306512	0.86607		85	0.780927	0.910045
86	-0.103467	0.834766		86	0.804312	0.731288
87	0.493916	0.776096		87	0.257591	0.596706
88	0.194198	0.797319		88	0.82389	0.710377
89	0.433993	0.900438		89	0.684829	0.769031
90	0.375565	0.818		90	0.0126559	0.799524
91	0.270646	0.895794		91	0.571374	0.323814
92	0.355234	0.877757		92	0.631874	0.448868
93	0.456126	0.788067		93	0.728265	0.464421
94	0.731738	0.923075		94	0.296907	0.799772
95	0.166078	0.926707		95	0.501672	0.459575
96	-0.262603	0.938099		96	0.720208	0.53605
97	-0.51462	0.850744		97	0.467886	0.642618
98	0.258834	0.952437		98	0.0205231	0.7885
99	0.650631	0.91782		99	0.792235	0.813407
100	0.00225375	0.870193		100	0.0591154	0.898808
101	0.134416	0.93025		101	0.0692239	0.7516
102	0.532187	0.932251		102	0.292514	0.852712
103	0.799761	0.952162		103	0.239704	0.886697
104	0.396437	0.728295		104	0.344777	0.726743
105	0.612846	0.898229		105	0.147057	0.568973
106	0.345531	0.822195		106	0.48323	0.881944
107	0.583464	0.779164		107	0.14691	0.787173
108	-0.0733293	0.907854		108	0.523098	0.817721
109	-0.00199035	0.836402		109	0.484012	0.732117
110	-0.0753329	0.948275		110	-0.0136135	0.857787
111	0.00897967	0.931232		111	0.368512	0.877198
112	0.346427	0.738622		112	-0.168916	0.959151
113	0.451523	0.914113		113	0.690255	0.92235
114	0.27054	0.929857		114	0.112378
115	-0.202913	0.925031		115	0.372359
116	-0.141558			116	0.344153
117	0.0189189			117	-0.329951
118	0.489158			118	0.503991
119	0.671394			119	0.277409
120	0.294317			120	0.60406
121	0.188577			121	0.535209
122	0.247285			122	0.876333
123	0.769053			123	0.413397
124	0.329541			124	0.513656
125	0.278661			125	0.549197
126	0.628224			126	-0.409081
127	0.249618			127	0.792736
128	0.310327			128	0.488097
129	-0.0757148			129	0.81251
130	0.103877			130	0.0456034
131	-0.137347			131	0.917023
132	0.351544			132	0.307405
133	0.332144			133	0.0873758
134	-0.190466			134	0.718756
135	0.297958			135	0.333368
136	0.279646			136	0.776506
137	0.0335065			137	0.208232
138	0.244833			138	0.653103
139	0.595455			139	0.355802
140	0.249547			140	0.436209
141	0.394415			141	-0.240719
142	0.318825			142	-0.136446
143	0.30617			143	0.665535
144	0.051082			144	0.285096
145	0.395172
146	0.612516
147	0.572858
148	0.0940442
149	0.524288
150	0.263575
151	0.648756
152	0.181364
153	0.16908
154	0.182383
155	0.212797
156	0.611613
157	0.4806
158	-0.0349198
159	0.426816
160	0.671233
161	0.0724579
162	0.442742
163	-0.286957
164	0.323805
165	0.483243
166	-0.0947287
167	0.159295
168	0.608515
169	0.733218
170	0.346195
171	0.81477
172	0.155626
173	0.260361
174	0.108106
175	0.587102
176	-0.0934543
177	0.300466
178	0.174115
179	0.0598396
180	0.533205
181	-0.00419984
182	0.297886
183	0.464985
184	0.34969
185	0.21196
186	0.451159
187	0.236169
188	0.458593
189	0.497527
190	0.1521
191	0.224225
192	0.201509
193	0.362307
194	0.285631
195	0.570695
196	0.0926208
197	0.352969
198	0.352458
199	0.638873
200	0.149641
201	0.509143
202	0.558014
203	0.343396
204	0.477464
205	0.0959108
206	-0.0657244
207	0.0779666
208	0.269351
209	-0.196275
210	0.429593
211	0.207285
212	0.169894
213	0.128515
214	0.426465
215	0.136131
216	0.0374504
217	-0.1655
218	-0.148876
219	0.344194
220	0.129699
221	-0.0898021
222	-0.176768
223	0.51121
224	0.591299
225	-0.0586974
226	0.245854
227	0.507719
228	0.364235
229	-0.101089
230	-0.359056
231	-0.175702
232	0.428809
233	-0.0715268
234	0.487651
235	0.560895
236	-0.0812236
237	0.453103
238	0.770564
239	0.181196
240	0.149587
241	0.484931
242	0.668934
243	0.59522
244	0.129506
245	0.243815
246	0.507856
247	0.185046
248	0.45626
249	0.221786
250	0.264213
251	0.192945
252	0.708241
253	0.153872
254	0.268173
255	0.264098
256	0.766166
257	0.45667
258	0.571197
259	0.460089
260	0.526363
261	0.178373
262	0.74155
263	-0.048445
264	0.367834
265	-0.18305
266	0.615774
267	0.389496
268	0.36472
269	0.592168
270	0.672125
271	0.434893
272	0.664967
273	0.584901
274	0.178641
275	0.25787
276	0.312573
277	0.327043
278	0.0417793
279	0.0224527
280	-0.0761377
281	0.594153
282	0.600045
283	0.520054
284	0.529602
285	0.347178
286	-0.107234
287	0.416736
288	0.212551
289	0.106164
290	0.171647
291	-0.208417
292	-0.122165
293	0.572532
294	0.375107
295	-0.235892
296	0.0876126
297	0.718703
298	0.598374
299	-0.0930971
300	-0.326612
301	-0.235255
302	0.543868
303	0.402975
304	0.175502
305	0.622067
306	0.570021
307	0.777181
308	0.304726
309	0.101403
310	-0.0500142
311	0.397085
312	0.518136
313	0.725078
314	0.0850457
315	0.207272
316	0.658407
317	0.366894
318	0.238109
319	0.599373
320	0.507197
321	0.778448
322	0.3572
323	-0.0107884
324	0.331711
325	-0.0185963
326	-0.167134
327	0.220978
328	-0.0971403
329	0.133384
330	0.123801
331	0.0536176
332	0.0484774
333	0.181695
334	0.28109
335	-0.0730443
336	-0.0920497
337	0.147224
338	0.00515202
339	-0.117156
340	0.120712
341	0.114263
342	0.264134
343	-0.0733334
344	-0.274637
345	-0.309595
346	0.00519757
347	-0.038209
348	0.102764
349	-0.0420303
350	0.0235924
351	0.0430329
352	0.0980579
353	0.00834343
354	0.348079
355	0.0644382
356	-0.0575228
357	-0.118596
358	0.00212774
