# Supplementary material for: The transpeptidase PBP2 governs initial localization and activity of the major cell-wall synthesis machinery in E. coli
Source: eLife. 2020 Feb 20;9:e50629. doi: 10.7554/eLife.50629 (PMC7089770; doi:10.7554/eLife.50629)
Supplement: Figure 6—source data 1. — The file Dataset-Fig6.xlsx contains: Figure 6C-D For filamentous NO53 cells, numerical values of correlations between contour curvature and normalized MreB-msfGFP intensities for the full contour, side walls or flat regions with number of cells considered. Figure 6E-F For filamentous NO53 cells, numerical values of the distribution of contour curvatures for the full contour, side walls or flat regions with number of cells considered. Figure 6—figure supplement 1 For NO53 cells, numerical values of the (i) correlations between contour curvature and normalized MreB-msfGFP intensities, and (ii) distribution of contour curvatures for the full contour and side walls. Figure 6—figure supplement 2 For filamentous NO53 cells, numerical values of (i) correlations between curvature and normalized MreB-msfGFP intensities, and (ii) curvature distributions after applying curvature or intensity correction methods. [file elife-50629-fig6-data1.xlsx]

## Sheet: Panels C-F
Panels C-D	Full contours					Side walls					Flat regions
Intensity-Curvature correlations		Replicate 1	Replicate 2	Replicate 3			Replicate 1	Replicate 2	Replicate 3			Replicate 1	Replicate 2	Replicate 3
	Curvature [1/um]	Avg intensity	Avg intensity	Avg intensity		Curvature [1/um]	Avg intensity	Avg intensity	Avg intensity		Curvature [1/um]	Avg intensity	Avg intensity	Avg intensity
	-0.9	0.92006	1.07924	1.13382		-0.5	1.01561	1.0215	1.05078		-0.5	1.14032	0.854964	0.964183
	-0.7	1.02379	1.135	1.05677		-0.3	1.04616	1.02044	1.02682		-0.3	0.983286	1.02069	1.00335
	-0.5	1.04226	1.02661	1.05317		-0.1	1.02337	1.01193	1.01108		-0.1	1.00934	0.999903	0.993439
	-0.3	1.0579	1.02773	1.03507		0.1	0.980076	0.993049	0.991633		0.1	0.995324	0.997762	1.00992
	-0.1	1.03019	1.01513	1.01325		0.3	0.953903	0.96627	0.958876		0.3	0.978254	1.0291	0.986738
	0.1	0.969808	0.984867	0.986749		0.5	0.969492	0.945743	0.923258		0.5	1.02285	1.03514	1.00549
	0.3	0.908923	0.935808	0.933788
	0.5	0.762114	0.824532	0.813065
	0.7	0.575433	0.662283	0.660281
	0.9	0.476615	0.560071	0.530904
	1.1	0.375025	0.454633	0.432107
	1.3	0.324515	0.36154	0.345495
	1.5	0.294507	0.325241	0.310888
	1.7	0.263583	0.279635	0.269556
	1.9	0.248522	0.248872	0.243937
Panels E-F
Curvature distributions		Replicate 1	Replicate 2	Replicate 3		Side walls					Flat regions
	Curvature [1/um]	Frequency	Frequency	Frequency			Replicate 1	Replicate 2	Replicate 3			Replicate 1	Replicate 2	Replicate 3
	-0.9	0.00170515	0.00181566	0.00156473		Curvature [1/um]	Frequency	Frequency	Frequency		Curvature [1/um]	Frequency	Frequency	Frequency
	-0.7	0.00464248	0.00556252	0.0075056		-0.5	0.0263666	0.0368097	0.0401737		-0.5	0.00149683	0.00565146	0.00457275
	-0.5	0.0214575	0.0307507	0.0350728		-0.3	0.122588	0.144462	0.144649		-0.3	0.0414322	0.0763461	0.0737101
	-0.3	0.103939	0.119817	0.124695		-0.1	0.346781	0.319314	0.320669		-0.1	0.484253	0.462084	0.48519
	-0.1	0.302259	0.270666	0.282719		0.1	0.350883	0.322295	0.321578		0.1	0.426296	0.401356	0.385272
	0.1	0.318788	0.280256	0.290199		0.3	0.118522	0.134706	0.137733		0.3	0.0352652	0.0426428	0.046683
	0.3	0.121476	0.124406	0.137365		0.5	0.0170708	0.0225189	0.0214683		0.5	0.0031134	0.00318537	0.00143325
	0.5	0.0295351	0.0361317	0.0329865
	0.7	0.0156948	0.0189159	0.0129631
	0.9	0.0122721	0.0164895	0.0117673
	1.1	0.0123343	0.0212762	0.0118563
	1.3	0.014836	0.0223987	0.0145659			# of cells
	1.5	0.0132429	0.0203024	0.0130012		Replicate 1	89
	1.7	0.0142261	0.0181566	0.0126577		Replicate 2	87
	1.9	0.0074429	0.00790638	0.00823071		Replicate 3	83

## Sheet: SI 1
Intensity-Curvature correlations		Full contours					Side walls
			Replicate 1	Replicate 2	Replicate 3			Replicate 1	Replicate 2	Replicate 3
		Curvature [1/um]	Avg intensity	Avg intensity	Avg intensity		Curvature [1/um]	Avg intensity	Avg intensity	Avg intensity
		-0.9	1.03568	0.984304	NaN		-0.7	0.98978	1.0047	1.3092
		-0.7	1.00997	0.944278	1.04369		-0.5	1.06692	1.03837	1.11989
		-0.5	1.08631	1.01315	1.04606		-0.3	1.03795	1.03404	1.08805
		-0.3	1.04409	1.01962	1.08945		-0.1	1.01586	1.01522	1.0083
		-0.1	1.00878	1.00626	1.00909		0.1	0.988173	1.0032	0.994194
		0.1	0.991224	0.993736	0.990912		0.3	0.986447	0.973953	0.959745
		0.3	0.96844	0.947853	0.947085		0.5	0.948459	0.961039	0.970408
		0.5	0.854815	0.878428	0.871108		0.7	0.838013	0.947408	0.960704
		0.7	0.722955	0.76205	0.74992		0.9	0.816746	0.873865	1.00519
		0.9	0.596061	0.624313	0.630864
		1.1	0.46532	0.499776	0.483219
		1.3	0.378323	0.409696	0.374366
		1.5	0.303174	0.338434	0.319554
		1.7	0.253983	0.282442	0.286552
		1.9	0.225761	0.254085	0.248193
Curvature distributions		Full contours					Side walls							# of cells
			Replicate 1	Replicate 2	Replicate 3			Replicate 1	Replicate 2	Replicate 3			Replicate 1	88
		Curvature [1/um]	Frequency	Frequency	Frequency		Curvature [1/um]	Frequency	Frequency	Frequency			Replicate 2	188
		-0.9	0.00494056	0.00541054	0.00412741		-0.9	0.00866724	0.0100082	0.00805533			Replicate 3	87
		-0.7	0.00926355	0.00877385	0.0083382		-0.7	0.016482	0.0161907	0.0160293
		-0.5	0.0242782	0.0206186	0.0171767		-0.5	0.0419864	0.036617	0.0322213
		-0.3	0.0765401	0.0635739	0.0546569		-0.3	0.127096	0.110329	0.100163
		-0.1	0.164081	0.157198	0.161469		-0.1	0.265843	0.255431	0.279821
		0.1	0.200479	0.199843	0.221087		0.1	0.298167	0.298231	0.337754
		0.3	0.138413	0.145993	0.148962		0.3	0.167732	0.171232	0.171196
		0.5	0.0684345	0.0797141	0.0716668		0.5	0.0449702	0.0555404	0.0390561
		0.7	0.0426123	0.051784	0.0462353		0.7	0.00930662	0.015166	0.00642799
		0.9	0.0458932	0.0440155	0.0490286		0.9	0.00284172	0.00546523	0.00113914
		1.1	0.0529566	0.0522958	0.0513216		1.1	0.00163399	0.0015371	0
		1.3	0.0626061	0.0562441	0.0564496		1.3	0	0.000204946	0
		1.5	0.0557357	0.0513819	0.0491954
		1.7	0.0341207	0.0365029	0.0386892
		1.9	0.00995831	0.0116071	0.0148003

## Sheet: SI 2
Panel A
Intensity-Curvature correlations after curvature correction		Side walls before correction					Side walls after correction							# of cells
			Replicate 1	Replicate 2	Replicate 3			Replicate 1	Replicate 2	Replicate 3			Replicate 1	89
		Curvature [1/um]	Avg intensity	Avg intensity	Avg intensity		Curvature [1/um]	Avg intensity	Avg intensity	Avg intensity			Replicate 2	87
		-0.5	1.01561	1.0215	1.05078		-0.5	0.877812	0.865114	0.94327			Replicate 3	83
		-0.3	1.04616	1.02044	1.02682		-0.3	1.00264	1.01147	0.9955
		-0.1	1.02337	1.01193	1.01108		-0.1	1.00372	1.00022	0.99129
		0.1	0.980076	0.993049	0.991633		0.1	0.997224	0.995342	1.00396
		0.3	0.953903	0.96627	0.958876		0.3	1.00952	1.01918	1.00552
		0.5	0.969492	0.945743	0.923258		0.5	1.03479	1.03519	1.15817
Panel B
Curvature distributions			Replicate 1	Replicate 2	Replicate 3			Replicate 1	Replicate 2	Replicate 3
		Curvature [1/um]	Frequency	Frequency	Frequency		Curvature [1/um]	Frequency	Frequency	Frequency
		-0.5	0.0263666	0.0368097	0.0401737		-0.5	0.00227269	0.00397391	0.0037754
		-0.3	0.122588	0.144462	0.144649		-0.3	0.031117	0.0509476	0.0517401
		-0.1	0.346781	0.319314	0.320669		-0.1	0.405273	0.397544	0.399832
		0.1	0.350883	0.322295	0.321578		0.1	0.480187	0.444671	0.451074
		0.3	0.118522	0.134706	0.137733		0.3	0.0593975	0.0762431	0.0804846
		0.5	0.0170708	0.0225189	0.0214683		0.5	0.00808257	0.0105462	0.00773957
Panel C
Intensity-Curvature correlations after intensity correction		Side walls after correction
			Replicate 1	Replicate 2	Replicate 3
		Curvature [1/um]	Avg intensity	Avg intensity	Avg intensity
		-0.5	0.864927	0.849979	0.922049
		-0.3	0.99175	1.00034	0.985633
		-0.1	1.0024	0.999181	0.990548
		0.1	1.00171	1.001	1.00923
		0.3	1.00018	1.01464	0.99776
		0.5	0.993855	0.986601	1.09703
Panel D
Intensity- Centerline curvature correlations			Replicate 1	Replicate 2	Replicate 3
		Centerline curvature [1/um]	Frequency	Frequency	Frequency
		-0.5	1.03561	1.09744	1.14433
		-0.3	1.04458	1.0356	1.07388
		-0.1	1.02903	1.02164	1.01518
		0.1	0.975552	0.983642	0.983605
		0.3	0.94297	0.934964	0.920702
		0.5	0.861591	0.941349	0.977891
Panel E
Centerline curvature distributions			Replicate 1	Replicate 2	Replicate 3
		Centerline curvature [1/um]	Frequency	Frequency	Frequency
		-0.5	0.00683515	0.00906868	0.00835736
		-0.3	0.0767417	0.0922916	0.0933038
		-0.1	0.415013	0.395965	0.397721
		0.1	0.415013	0.395965	0.397721
		0.3	0.0767417	0.0922916	0.0933038
		0.5	0.00683515	0.00906868	0.00835736
