# Supplementary material for: The transpeptidase PBP2 governs initial localization and activity of the major cell-wall synthesis machinery in E. coli
Source: eLife journal article supplement (doi:10.7554/elife.50629), 2020-02-20
Supplement: supp [file elife_poa_e50629_Supplementary_file_3.xlsx]

## Sheet: Strain List
Strain	Genotype	Source
TKL130	MG1655 mrdA::PAmCherry-mrdA	(Lee et al., 2014)
EW07	TKL130 ΔmreCD, pFB121	This study
EW49	TKL130 ΔrodZ, pFB290	This study
AV48	186attB::Ptet-dcas9, mrdA::rPAmCherry-mrdA,	This study
NO53	MG1655 mreB-msfGFPsw	(Ouzounov et al., 2016)
	(after removal of KAN resistance cassette from NO50)
TU230(attLHC943)	MG1655 mrdA::aph (Plac::msfgfp-mrdA)	(Rohs et al., 2018)
TU230(attLPR122)	MG1655 mrdA::aph (Plac::msfgfp-pbpA(L61R))	(Rohs et al., 2018)
S352	MG1655 ΔponA::aph	This study
FB83	MG1655, lacIZYA::frt, mreB-mCherrySW yhdE::frt	(Bendezú and Boer, 2008)
AV07	MG1655 mrdA::mcherry-mrdA	(Vigouroux et al., 2018)
AV127	186::dCas9, mrdA::sfgfp-mrdA	This study
FB60 (iFB273)	MG1655 lacIZYA::frt, rodZ::aph, Plac::gfp-rodZ	(Bendezú and Boer, 2008)
S504	FB83, rodZ::aph, Plac::gfp-rodZ	This study
S505	AV07, rodZ::aph, Plac::gfp-rodZ	This study

## Sheet: Plasmid List
Plasmid	Relevant genotype	Source
pKC128	cat PmrdA::rPAmCherry-mrdA	(Lee et al., 2014)
pFB121	bla lacIq Plac::mreC mreD	(Bendezú and Boer, 2008)
pFB290	bla Plac::rodZ	(Bendezú et al., 2009)
pDB192	bla Plac::sfiA	(de Boer et al., 1990)
pcrRNA G20-R20	CRISPR array cloning vector	(Vigouroux et al. 2018)
pTKred	aadA λ-Red enzymes	(Kuhlman and Cox, 2010)
pAV10	PPhlF-Cas9-gRNA	(Vigouroux et al., 2018)
pAV101	pSW23t-mrdA::msfgfp-mrdA	This study
pKD13	Template vector for gene deletion.	(Datsenko and Wanner, 2000)

## Sheet: Primer List
Primer	Sequence
DmreC_fw	ATCGGATGCAGGCAGGGGAAGTGTCTGTTTACCCTGCCTGGTCTGATACGATAAGTGTAGGCTGGAGCTGCTTC
DmreC_rv	TCAGCAAGAAAATCCACGGCCAGAGCACCCCATTGACTACACTACTCCAGAATTCCGGGGATCCGTCGACC
V171	ggctgcaggaattcgatatcaag
V180	tcgataagcttgatatcgaattcctgcagccgccgtgccatcggggtc
V394	taggcgcaatcactttcgtcagtgagggttaattgcgcgc
V395	gtgaacagttcttcacctttagacatccgctgcgttttctactcaaag
V396	ctttgagtagaaaacgcagcggatgtctaaaggtgaagaactgttcac
V397	gcgcgcaattaaccctcactgacgaaagtgattgcgccta
