# Supplementary material for: The transpeptidase PBP2 governs initial localization and activity of the major cell-wall synthesis machinery in E. coli
Source: eLife. 2020 Feb 20;9:e50629. doi: 10.7554/eLife.50629 (PMC7089770; doi:10.7554/eLife.50629)
Supplement: Supplementary file 1. — (a) Unperturbed conditions. Measurement results at different levels of PAmCherry-PBP2 and msfGFP-PBP2 as well as msfGFP-PBP2(L61R). Protein levels are measured based on fluorescence, mass spectrometry (DIA and PRM), and Western Blots. (b) PBP2 dynamics under different perturbations corresponding to Figures 3 and 5. [file elife-50629-supp1.xlsx]

## Sheet: a
Table 1a. Relative and absolute levels as well as bound and persistent fractions of the different PBP2 fusions in non-perturbed conditions.
Strain	IPTG level	Fluorescence signal#	Bocillin signal$	DIA$	PRM*	GFP-Western#	Bound fraction	Diffusion constant	Persistent fraction
MG1655	NA	NA	1 ± 0.05	1 ± 0.08	213	NA	NA	NA	NA
TKL130	NA	1 ± 0.05 ##	0.9 ± 0.2	1.59 ± 0.04	435 ± 40.5	NA	22.0 ± 1.1	0.042 ± .002	42.2 ± 0.6
TKL130/pKC128	NA	2.9 ##	2.5 ± 0.9	9.14 ± 0.73	3028 ± 223.5	NA	12.3 ± 0.7	0.025 ± .001	47.8 ± 1.4
MG1655	NA	0 ± 0.16	ND	1 ± 0.08	213	NA	NA	NA	NA
AV127	NA	ND	ND	ND	ND	0.23 ± 0.05	34.0 ± 5.0	0.024±.001	76.0 ± 2.2
TU230(attLHC943)	5uM	1 ± 0.05	ND	0.83 ± 0.05	245.7 ± 4.1	1 ± 0.1	7.0 ± 1.5	0.021±.004	79.6 ± 5.9
TU230(attLHC943)	15uM	ND	ND	1.48 ± 0.17	ND	1.44 ± 0.08	4.4 ± 1.4	0.010±.001	79.4 ± 6.0
TU230(attLHC943)	25uM	2.56 ± 0.25	ND	3.5 ± 0.18	1206.3 ± 86.7	4.76 ± 0.8	4.3 ± 1.1	0.012±.001	83.2 ± 4.4
TU230(attLHC943) (L61R)	5uM	1.14 ± 0.51	ND	ND	ND	ND	16.8 ± 1.9	0.024±.001	64.2 ± 1.1
TU230(attLHC943) (L61R)	25uM	2.44 ± 0.16	ND	ND	ND	ND	7.3 ± 1.7	0.018±.002	53.0 ± 6.0
#Fold change wrt. TU230(attLHC943)+5uM IPTG, ##Fold change wrt. TKL130, $Fold change wrt. MG1655, *Absolute number of
PBP2 molecules per cell, ND: No data, NA: Not applicable, ± standard error

## Sheet: b
Table 1b. Relative PBP2 levels, average diffusion constants, bound and persistent fractions of the
PAmCherry-PBP2 fusion under several perturbations.
Perturbation	Perturbation time [h]	PBP2 fold change (DIA)*	Bound fraction [%]	Average diffusion constant [μm2/s]	Persistent fraction [%]
A22 (50 μg/ml)	0.5	ND	14.67 ± 2.2	0.043 ± 0.001	ND
A22 (20 μg/ml)	10 min	ND	16.55 ± 1.8	0.047 ± 0.001	ND
A22 (20 μg/ml)	0.5	ND	19.04 ± 1.2	0.046 ± 0.001	6.92 ± 3.3
A22 (20 μg/ml)	2	ND	20.72 ± 4.0	0.031 ± 0.001	ND
Mecillinam (100 μg/ml)	10 min	ND	19.24 ± 1.3	0.034 ± 0.001	ND
Mecillinam (100 μg/ml)	0.5	ND	20.65 ± 1.3	0.040 ± 0.001	5.74 ± 3.4
Mecillinam (100 μg/ml)	2	ND	31.18 ± 1.6	0.024 ± 0.003	ND
RodA repression	9	6.0 ± 0.3	19.23 ± 2.9	0.025 ± 0.003	26.68 ± 5.0
MreCD depletion	6	1.8 ± 0.1	15.82 ± 1.2	0.026 ± 0.004	21.37 ± 5.3
ponA deletion	NA	ND	12.61 ± 1.6	0.042 ± 0.001	39.19 ± 9.9
RodZ depletion	0	1.5 ± 0.0	31.68 ± 3.3	0.035 ± 0.003	56.48 ± 5.6
RodZ depletion	2	ND	9.23 ± 0.9	0.030 ± 0.002	ND
RodZ depletion	4	ND	12.35 ± 1.6	0.022 ± 0.001	ND
RodZ depletion	6	1.7 ± 0.1	13.46 ± 3.1	0.023 ± 0.003	39.42 ± 4.2
RodZ depletion	8	ND	17.54 ± 1.1	0.012 ± 0.000	ND
RodZ depletion	10	ND	22.16 ± 2.0	0.013 ± 0.001	ND
RodZ depletion	12	ND	25.49 ± 7.3	0.013 ± 0.001	ND
* Normalized by the PBP2 levels in MG1655, ± standard error
