# Supplementary material for: The transpeptidase PBP2 governs initial localization and activity of the major cell-wall synthesis machinery in E. coli
Source: eLife. 2020 Feb 20;9:e50629. doi: 10.7554/eLife.50629 (PMC7089770; doi:10.7554/eLife.50629)
Supplement: Supplementary file 2. — (a, b) Measurements of PAmCherry-PBP2 in TKL130 and TKL130/pKC128, constraining D0 = 0 (a) or leaving D0 free (b). (c) All measurements carried out with the msfGFP-PBP2 or msfGFP-PBP2(L61R) fusions. [file elife-50629-supp2.xlsx]

## Sheet: a
	2-state				3-state
Figure 1	D1	F0	F1	chi2	D1	D2	F0	F1	F2	Number of tracks	chi2		D0 = 0 um2/s if not shown otherwise
TKL130	0.0398486	26.6676	73.3324	0.197535	0.00713961	0.046562	21.8787	12.5187	65.6026	912	0.168309		F0: population size for tracks which have D0 as avg diffusion constant
	0.0369838	23.2276	76.7724	0.0890149	0.0125827	0.0518342	18.2863	24.5255	57.1882	2228	0.045237		F1: population size for tracks which have D1
	0.0444778	29.8931	70.1069	0.167908	0.0132346	0.0586266	25.7848	18.5988	55.6164	826	0.137226		F2: population size for tracks which have D2
	0.0347674	24.0156	75.9844	0.0919058	0.014699	0.0526022	19.7958	29.5651	50.6392	1724	0.0527197		chi2: normalized sum of residuals
	0.0374629	25.8961	74.1039	0.0686163	0.0160925	0.0543901	22.4749	26.8499	50.6753	2538	0.0388934
	0.0425488	26.0224	73.9776	0.104501	0.0232931	0.0652257	23.8523	32.6234	43.5244	1861	0.0848676
TKL130/pKC128	0.0221402	20.8185	79.1815	0.0859247	0.00756905	0.0327323	12.7568	30.2058	57.0374	4251	0.027439
	0.0247706	17.5256	82.4744	0.0669226	0.00894883	0.035099	10.9706	28.3385	60.6909	4295	0.0217624
	0.0228969	21.0925	78.9075	0.071214	0.00657374	0.0309056	13.1145	24.6082	62.2773	4263	0.0219674
Figure 3	D1	F0	F1	chi2	D1	D2	F0	F1	F2	NB	chi2
A22 treatment (20 ug/ml)
time [min]
10	0.0450254	20.338	79.662	0.157788	0.00902118	0.0538182	14.455	15.357	70.188	1226	0.12659
10	0.0469601	23.4421	76.5579	0.105878	0.01403	0.0573604	20.0685	15.6181	64.3134	1003	0.0866517
10	0.0433835	19.0932	80.9068	0.0648091	0.0145412	0.0554234	15.1356	19.9771	64.8873	2337	0.0397346
30	0.0453425	21.9564	78.0436	0.209983	0.0268221	0.0702577	19.8118	37.2585	42.9297	632	0.19391
30	0.0424961	20.6164	79.3836	0.188934	0.0187993	0.0517764	18.6533	18.2574	63.0892	506	0.180085
30	0.0404464	24.468	75.532	0.183591	0.0214949	0.059203	21.649	31.8037	46.5473	566	0.168509
30	0.0418872	20.2244	79.7756	0.186406	0.0184509	0.0606065	16.0609	29.7337	54.2054	514	0.160436
120	0.0283802	35.6795	64.3205	0.130049	0.00873118	0.037816	29.7687	20.4183	49.813	773	0.107505
120	0.0271021	26.7707	73.2293	0.112489	0.00580598	0.035986	17.1982	22.8659	59.9359	1453	0.0467066
120	0.0301162	31.4313	68.5687	0.0885828	0.00727573	0.0395876	24.3069	20.1622	55.5309	2172	0.046882
A22 treatment (50 ug/ml)
time [min]
30	0.0445143	18.8585	81.1415	0.35592	0.00860219	0.0533673	11.2507	16.8291	71.9202	251	0.325093
30	0.0421846	23.7934	76.2066	0.40164	0.0109383	0.0511739	18.749	16.2451	65.0059	237	0.379421
30	0.0394385	18.4047	81.5953	0.257442	0.0131767	0.0495962	14.0251	19.682	66.2929	395	0.237144
Mecillinam treatment (100ug/ml)
time [min]
10	0.0314228	27.8473	72.1527	0.0794959	0.00930187	0.043581	21.6509	23.1364	55.2127	3544	0.0332138
10	0.0303024	25.2798	74.7202	0.0840071	0.00901144	0.0425222	18.6513	24.5672	56.7815	3138	0.0298506
10	0.0338888	22.6796	77.3204	0.0927704	0.0122565	0.0488464	17.4223	26.8234	55.7543	1390	0.0491819
30	0.0365509	26.146	73.854	0.0653555	0.0101274	0.0478399	21.261	19.3056	59.4334	4448	0.0260098
30	0.0347473	28.0478	71.9522	0.0830132	0.0115686	0.0515445	22.5753	25.8016	51.6231	2430	0.0293712
30	0.0384567	21.8229	78.1771	0.0935654	0.0138714	0.0533749	18.1287	23.6556	58.2158	1498	0.0521617
120	0.0233545	37.261	62.739	0.0736128	0.00782846	0.0352052	31.2461	24.8306	43.9233	2872	0.0287254
120	0.0246696	34.4257	65.5743	0.0937086	0.00805416	0.0368634	28.3239	25.0199	46.6561	1797	0.043657
120	0.0179998	42.3877	57.6123	0.0818861	0.00488538	0.0261531	33.9734	23.4656	42.561	2001	0.0367748
Figure 4	D1	F0	F1	chi2	D1	D2	F0	F1	F2	NB	chi2
with A22:
reference	0.043	21.452	78.548	0.213228	0.0268598	0.0703398	19.8145	37.3509	42.8345	632	0.19391
reference	0.043	20.732	79.268	0.189108	0.0188134	0.0517862	18.6542	18.2789	63.0669	506	0.180085
reference	0.043	25.2442	74.7558	0.187272	0.021496	0.0592048	21.6491	31.8061	46.5447	566	0.168509
reference	0.043	20.571	79.429	0.187141	0.018462	0.0606234	16.0626	29.7559	54.1815	514	0.160436
time [min]
0	0.043	17.5224	82.4776	0.157842	0.02	0.06	12.4347	30.9675	56.5978	955	0.121319
0	0.043	11.6788	88.3212	0.173381	0.02	0.06	9.21961	23.0347	67.7457	888	0.134074
0	0.043	13.9315	86.0685	0.174346	0.02	0.06	10.4256	27.4511	62.1232	748	0.139212
3	0.043	15.8402	84.1598	0.217386	0.02	0.06	14.8827	16.2527	68.8646	711	0.147081
3	0.043	15.2425	84.7575	0.230139	0.02	0.06	14.0853	17.745	68.1697	693	0.167173
3	0.043	16.7288	83.2712	0.264205	0.02	0.06	16.2827	13.3812	70.3361	849	0.165865
5	0.043	16.8641	83.1359	0.148724	0.02	0.06	15.5432	18.6588	65.798	1221	0.0936548
5	0.043	21.5619	78.4381	0.150549	0.02	0.06	19.6775	21.7758	58.5467	1452	0.103415
5	0.043	18.7829	81.2171	0.101855	0.02	0.06	16.801	22.5032	60.6957	1933	0.0706922
10	0.043	22.4111	77.5889	0.351719	0.02	0.06	22.4548	9.06765	68.4776	466	0.243113
10	0.043	17.9042	82.0958	0.27334	0.02	0.06	16.1153	20.2409	63.6438	498	0.205667
10	0.043	18.2305	81.7695	0.121589	0.02	0.06	17.3181	16.3662	66.3157	2412	0.0614807
without A22:
reference	0.0398486	26.6676	73.3324	0.197535	0.00713961	0.046562	21.8787	12.5187	65.6026	912	0.168309
reference	0.0369838	23.2276	76.7724	0.0890149	0.0125827	0.0518342	18.2863	24.5255	57.1882	2228	0.045237
reference	0.0444778	29.8931	70.1069	0.167908	0.0132346	0.0586266	25.7848	18.5988	55.6164	826	0.137226
reference	0.0347674	24.0156	75.9844	0.0919058	0.014699	0.0526022	19.7958	29.5651	50.6392	1724	0.0527197
reference	0.0374629	25.8961	74.1039	0.0686163	0.0160925	0.0543901	22.4749	26.8499	50.6753	2538	0.0388934
reference	0.0425488	26.0224	73.9776	0.104501	0.0232931	0.0652257	23.8523	32.6234	43.5244	1861	0.0848676
time [min]
0	0.0488829	17.8808	82.1192	0.119925	0.0177315	0.0685196	13.9517	25.2414	60.8069	784	0.0764048
0	0.0397115	10.9177	89.0823	0.118673	0.0178514	0.0561184	8.08056	29.4381	62.4813	698	0.0810516
0	0.0488892	14.2356	85.7644	0.0725539	0.0160309	0.0644301	9.90502	22.1793	67.9157	2767	0.0346394
3	0.0464126	14.7089	85.2911	0.0912877	0.0188813	0.0675607	10.7953	29.218	59.9868	1750	0.0476385
3	0.0528482	21.0671	78.9329	0.14387	0.0115484	0.0710698	14.4531	21.3813	64.1656	1265	0.0670858
3	0.0526057	19.3206	80.6794	0.10898	0.0117784	0.0666853	13.9728	18.1226	67.9046	1548	0.0581056
3	0.045194	12.1132	87.8868	0.10436	0.0201277	0.0675629	7.72027	33.0141	59.2656	1475	0.0639889
10	0.0464448	15.5061	84.4939	0.0690078	0.019246	0.0628529	12.0998	25.5398	62.3604	2429	0.0430382
10	0.0451757	17.9294	82.0706	0.0637505	0.0150536	0.0567912	14.0532	19.1547	66.7921	2219	0.041367
10	0.0461288	16.2024	83.7976	0.0945884	0.0170343	0.0627903	12.2563	24.5573	63.1863	1681	0.0584324
Figure 5	D1	F0	F1	chi2	D1	D2	F0	F1	F2	NB	chi2
RodA	0.0282144	27.9102	72.0898	0.0741331	0.00799887	0.0405542	19.6235	26.164	54.2125	10563	0.0165126
	0.0326656	22.9882	77.0118	0.073859	0.00990942	0.0462793	15.7667	26.0586	58.1747	7179	0.0198933
	0.0283215	25.9076	74.0924	0.0895567	0.00793162	0.0414844	16.7336	27.9131	55.3533	4581	0.0209506
RodA repression 9h	0.0295238	21.2816	78.7184	0.0811379	0.00838887	0.0394567	14.651	22.8366	62.5124	2188	0.0335365
	0.0231473	28.5493	71.4507	0.0995699	0.00611461	0.0342315	18.5308	28.0602	53.409	4216	0.0194421
	0.0193759	35.1401	64.8599	0.092942	0.00582563	0.0309351	24.4946	30.8869	44.6185	3614	0.026985
MreCD +50uM IPTG	0.0374622	19.5701	80.4299	0.0622969	0.0126079	0.0498011	14.7732	22.6876	62.5392	3287	0.029167
	0.0341766	25.6332	74.3668	0.0945847	0.0107138	0.0463059	20.3819	22.2286	57.3895	1807	0.0557204
	0.0364939	26.6616	73.3384	0.157326	0.0122491	0.0579129	20.2262	29.2838	50.49	922	0.0877028
MreCD depletion 6h	0.0250028	24.582	75.418	0.0966793	0.00891576	0.0397975	17.1766	31.9365	50.8869	4267	0.0234842
	0.0167327	26.7644	73.2356	0.0958164	0.00598401	0.0272013	16.8774	34.8217	48.3009	2492	0.02892
	0.0317479	21.3077	78.6923	0.0867454	0.00757068	0.0416764	13.4203	22.0029	64.5768	2738	0.0299868
RodZ +100uM IPTG	0.0280843	33.4073	66.5927	0.0821075	0.00970747	0.0428968	27.2544	26.7201	46.0254	2180	0.0350869
	0.0401514	43.1641	56.8359	0.110205	0.0178263	0.0593358	40.8481	21.3121	37.8397	1994	0.0917417
	0.0328585	32.7145	67.2855	0.134072	0.00996612	0.0471056	27.4829	22.3434	50.1738	1148	0.0849071
	0.0334455	29.1089	70.8911	0.113195	0.0107363	0.0470733	24.5024	22.3566	53.141	2269	0.0665273
	0.0277818	45.0899	54.9101	0.130555	0.00816705	0.0433236	38.3198	23.1577	38.5225	3298	0.0827183
RodZ depletion 6h	0.0235595	18.1284	81.8716	0.0956388	0.00786319	0.0345803	10.4403	29.5836	59.9762	3827	0.0279114
	0.0266621	17.9579	82.0421	0.145459	0.0119087	0.0460892	11.9191	38.9046	49.1763	1236	0.0748935
	0.0232529	29.8333	70.1667	0.110099	0.0118551	0.0432334	25.3955	38.0116	36.5929	1399	0.0626408
	0.0123709	24.9996	75.0004	0.0836217	0.00500226	0.0228937	12.4178	43.8744	43.7078	5414	0.0129865
	0.015164	19.0643	80.9357	0.126443	0.00521398	0.0236663	7.13852	35.7014	57.1601	926	0.0556819
ΔponA	0.0388724	20.9345	79.0655	0.152398	0.0143518	0.0563744	15.3553	28.1695	56.4752	686	0.110749
	0.0409196	14.1841	85.8159	0.150362	0.0116711	0.051441	9.91368	18.5962	71.4902	773	0.114002
	0.0384499	17.7795	82.2205	0.0981119	0.0118909	0.0516694	12.5659	22.9284	64.5057	1671	0.0497777
RodZ depletion [h]
0	0.0280843	33.4073	66.5927	0.0821075	0.00970747	0.0428968	27.2544	26.7201	46.0254	2180	0.0350869
0	0.0401514	43.1641	56.8359	0.110205	0.0178263	0.0593358	40.8481	21.3121	37.8397	1994	0.0917417
0	0.0328585	32.7145	67.2855	0.134072	0.00996612	0.0471056	27.4829	22.3434	50.1738	1148	0.0849071
0	0.0334455	29.1089	70.8911	0.113195	0.0107363	0.0470733	24.5024	22.3566	53.141	2269	0.0665273
0	0.0277818	45.0899	54.9101	0.130555	0.00816705	0.0433236	38.3198	23.1577	38.5225	3298	0.0827183
2	0.0347873	16.3681	83.6319	0.0631409	0.011428	0.0456652	12.2722	21.5368	66.191	4847	0.0215795
2	0.0236853	14.3753	85.6247	0.0724331	0.0109834	0.0371725	7.74661	37.5034	54.75	6814	0.0306307
2	0.0240716	15.1373	84.8627	0.0700501	0.00814417	0.0334455	7.32288	27.456	65.2211	3996	0.0246032
2	0.0278563	14.3708	85.6292	0.0581536	0.0107953	0.0396758	8.48732	29.1569	62.3558	6831	0.0139162
2	0.0274739	17.5901	82.4099	0.0628261	0.00853902	0.0371012	10.318	24.9318	64.7502	5251	0.0191395
4	0.0219111	21.9538	78.0462	0.218723	0.00934032	0.0398322	15.9432	37.8815	46.1753	684	0.119821
4	0.0184269	16.963	83.037	0.0694831	0.00656125	0.0268063	8.08992	31.1968	60.7132	4123	0.0205466
4	0.0203638	18.2088	81.7912	0.0588603	0.0100933	0.0327734	13.0305	38.3832	48.5863	3763	0.0183251
4	0.0189429	20.3244	79.6756	0.080036	0.00748956	0.030109	12.3399	35.1579	52.5022	3663	0.0181789
6	0.0235595	18.1284	81.8716	0.0956388	0.00786319	0.0345803	10.4403	29.5836	59.9762	3827	0.0279114
6	0.0266621	17.9579	82.0421	0.145459	0.0119087	0.0460892	11.9191	38.9046	49.1763	1236	0.0748935
6	0.0232529	29.8333	70.1667	0.110099	0.0118551	0.0432334	25.3955	38.0116	36.5929	1399	0.0626408
6	0.0123709	24.9996	75.0004	0.0836217	0.00500226	0.0228937	12.4178	43.8744	43.7078	5414	0.0129865
6	0.015164	19.0643	80.9357	0.126443	0.00521398	0.0236663	7.13852	35.7014	57.1601	926	0.0556819
8	0.0109054	29.0229	70.9771	0.0875627	0.00469669	0.0230042	15.892	47.6286	36.4794	7866	0.0110367
8	0.00975028	29.2363	70.7637	0.0809815	0.00439911	0.0202049	17.1693	47.2791	35.5516	4753	0.016265
8	0.0100811	34.4162	65.5838	0.10605	0.00410956	0.0220604	19.5525	47.272	33.1755	2117	0.0331202
10	0.0113374	32.9335	67.0665	0.108236	0.00641166	0.0290047	24.148	51.346	24.506	943	0.0638145
10	0.00996902	30.8186	69.1814	0.0680691	0.00483782	0.0206727	20.1725	47.282	32.5455	3674	0.0230754
12	0.00971204	32.0698	67.9302	0.197017	0.00356185	0.021479	15.4542	47.2503	37.2955	1554	0.0596098
12	0.0101449	48.7087	51.2913	0.142998	0.00418649	0.023192	39.6034	35.0866	25.31	6375	0.0749284
12	0.011846	34.0453	65.9547	0.137355	0.00460009	0.0260716	21.4257	43.4524	35.1219	5014	0.0234813
Table 2a. Comparison of 2- and 3-state diffusion models for all measurements with cells carrying the PAmCherry-PBP2 fusion.

## Sheet: b
	2-state					3-state
	D0	D1	F0	F1	chi2	D0	D1	D2	F0	F1	F2	Number of tracks	chi2
TKL130	6.49032e-11	0.0398486	26.6677	73.3323	0.197535	2.40412e-11	0.00714206	0.046564	21.8798	12.5202	65.6001	912	0.168309
	0.000210532	0.0373103	23.2475	76.7525	0.0874238	8.90387e-06	0.0126564	0.0519106	18.3029	24.6137	57.0834	2228	0.0452338
	4.7552e-09	0.0444773	29.8929	70.1071	0.167909	4.90091e-10	0.0132351	0.0586272	25.7849	18.5994	55.6157	826	0.137226
	0.000148137	0.0350034	24.0288	75.9712	0.0910186	3.25712e-09	0.0146995	0.052603	19.7959	29.5661	50.6381	1724	0.0527197
	0.000103272	0.0376056	25.8835	74.1165	0.0680831	5.41029e-06	0.0161487	0.0544561	22.4818	26.9361	50.5821	2538	0.0388919
	2.68634e-10	0.0425491	26.0226	73.9774	0.104501	3.92219e-10	0.0232761	0.0651919	23.8509	32.5851	43.564	1861	0.0848676
TKL130/pKC128	0.000912054	0.0239822	22.2486	77.7514	0.0690947	0.000166384	0.00869169	0.0341629	13.5874	32.4173	53.9953	4251	0.026819
	0.00094985	0.0264615	18.6025	81.3975	0.0542979	0.000270021	0.0107859	0.0371923	11.8534	32.0948	56.0518	4295	0.0205408
	0.000772297	0.0243653	21.9783	78.0217	0.055692	0.000219246	0.00807328	0.0323228	14.2492	26.782	58.9687	4263	0.0206707
Table 2b. Leaving D0 free in 2- and 3-state diffusion models for TKL130 (native) and TKL130\pKC128 (overexpression) cells.

## Sheet: c
	2-state				3-state
	D1	F0	F1	chi2	D1	D2	F0	F1	F2	Number of tracks	chi2
AV127	0.0222176	43.688	56.312	0.0832919	0.00701314	0.0324997	36.5397	23.2215	40.2388	2369	0.0548026		D0 = 0 um2/s if not shown otherwise
	0.0258877	50.2119	49.7881	0.0684967	0.00672696	0.0351414	43.764	17.6766	38.5594	1232	0.0470942		F0: population size for tracks which have D0 as avg diffusion constant
	0.0240693	46.6527	53.3473	0.0686674	0.0039304	0.0294116	38.4458	15.3711	46.1831	1218	0.0429608		F1: population size for tracks which have D1
	0.0241738	36.5743	63.4257	0.121548	0.00601757	0.0306364	31.214	16.3946	52.3914	437	0.0924699		F2: population size for tracks which have D2
	0.0226063	39.9339	60.0661	0.13663	0.00578791	0.0313575	32.4536	21.1709	46.3755	444	0.0952824		chi2: normalized sum of residuals
AV127 + A22	0.0217962	67.5314	32.4686	0.312122	0.00240792	0.0375579	51.5079	24.4406	24.0515	1237	0.192274
(20 ug/ml, 30 min)	0.031478	60.4449	39.5551	0.0821727	0.00421352	0.0402828	51.5921	14.9933	33.4146	1091	0.05523
WT + 5uM	0.0192675	17.9057	82.0943	0.0677594	0.00589466	0.0276323	6.72645	29.9605	63.3131	6005	0.0126321
	0.0172868	17.4865	82.5135	0.0616677	0.00754524	0.02841	8.56467	39.6247	51.8106	6500	0.0130647
	0.0189041	14.4851	85.5149	0.0668288	0.00635278	0.0269564	5.56775	29.2351	65.1972	4699	0.0136379
WT + 5uM	0.015832	24.5079	75.4921	0.0783485	0.00496095	0.0236676	13.5641	31.66	54.7759	3188	0.0145338
at 10 hours	0.0157099	22.7619	77.2381	0.0632882	0.00507191	0.0220043	13.9443	27.906	58.1497	2473	0.0187118
	0.0180384	19.7941	80.2059	0.0741909	0.00608802	0.0263211	11.2217	30.1663	58.612	2830	0.0148696
WT + 15uM	0.0180003	16.391	83.609	0.0821891	0.00708923	0.0297819	6.04714	38.4631	55.4898	13694	0.00926973
	0.0168089	14.2819	85.7181	0.0874249	0.00699028	0.0287999	3.72189	40.8216	55.4565	11318	0.0110525
	0.0164401	13.5949	86.4051	0.0883344	0.00712661	0.0287496	3.49994	42.021	54.4791	14892	0.0105005
WT + 25uM	0.00945782	15.9642	84.0358	0.0736815	0.00442692	0.0185272	3.57807	51.9567	44.4652	7041	0.0152691
	0.00983535	13.9298	86.0702	0.0772229	0.00522666	0.0207442	3.74608	55.4045	40.8495	12866	0.0118554
	0.00991839	15.2915	84.7085	0.0672937	0.00541327	0.0210606	5.48205	56.0392	38.4788	10944	0.0118847
Mut + 5uM	0.0221272	22.6298	77.3702	0.072008	0.0065269	0.0308187	14.7221	25.8315	59.4464	4966	0.0142528
	0.0243911	28.42	71.58	0.0775586	0.00594098	0.0324148	20.7443	21.5201	57.7356	1816	0.0269433
	0.0207292	22.2042	77.7958	0.0766697	0.00841135	0.0328006	14.8987	34.416	50.6853	2959	0.0247816
Mut + 25uM	0.0179248	20.0316	79.9684	0.0955611	0.00667491	0.029828	8.97818	38.0449	52.9769	5892	0.017963
	0.0123873	15.3011	84.6989	0.107558	0.00571419	0.0239291	3.97421	47.8004	48.2254	6800	0.0202621
	0.016889	20.0078	79.9922	0.0909185	0.00658317	0.0284234	8.7878	39.3638	51.8484	4266	0.0237184
Table 2c. Comparison of 2- and 3-state diffusion models for all measurements with cells carrying the msfGFP-PBP2 fusion.
