# Supplementary figures and images for: The transpeptidase PBP2 governs initial localization and activity of the major cell-wall synthesis machinery in E. coli
Source: eLife journal article supplement (doi:10.7554/elife.50629), 2020-02-20

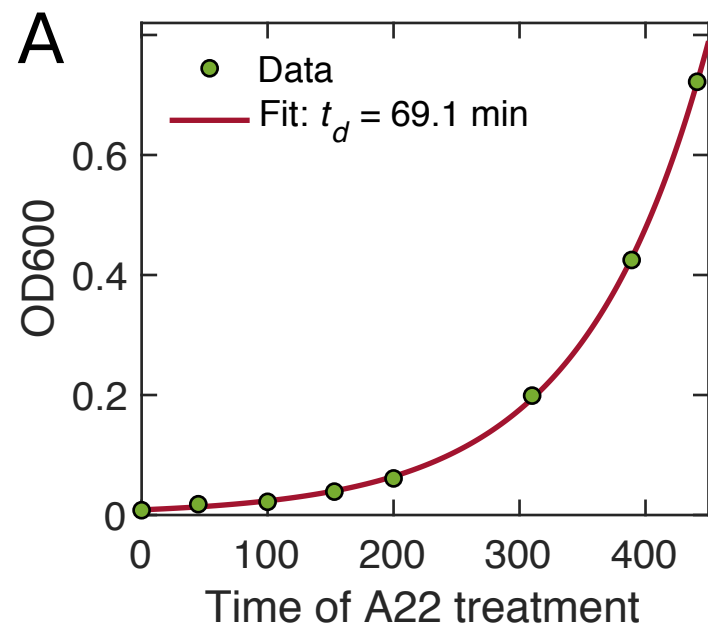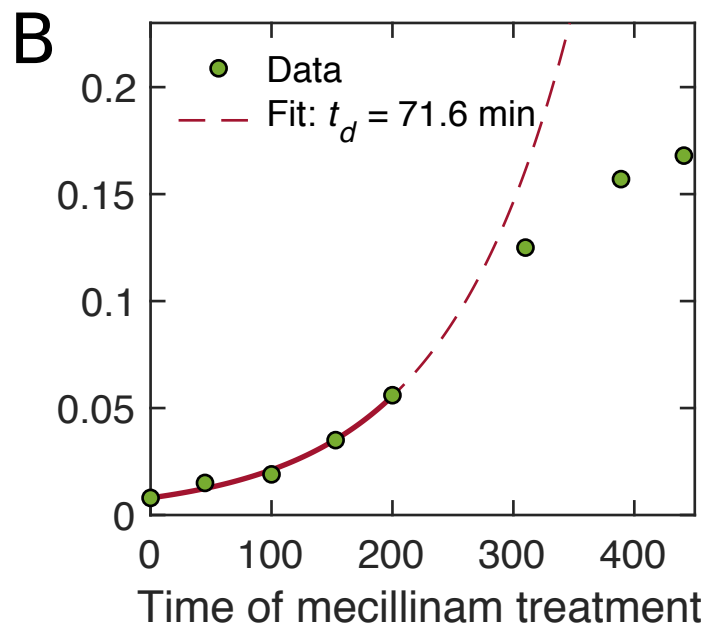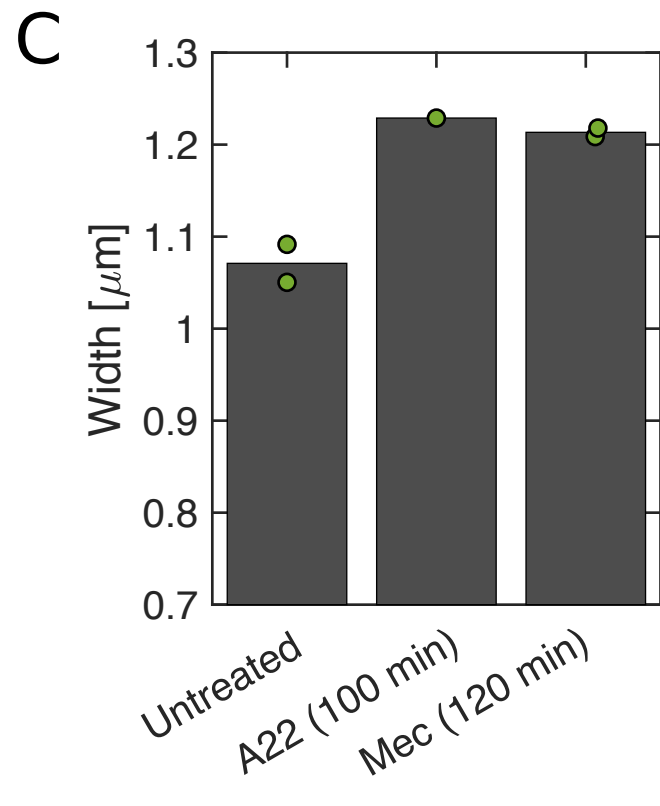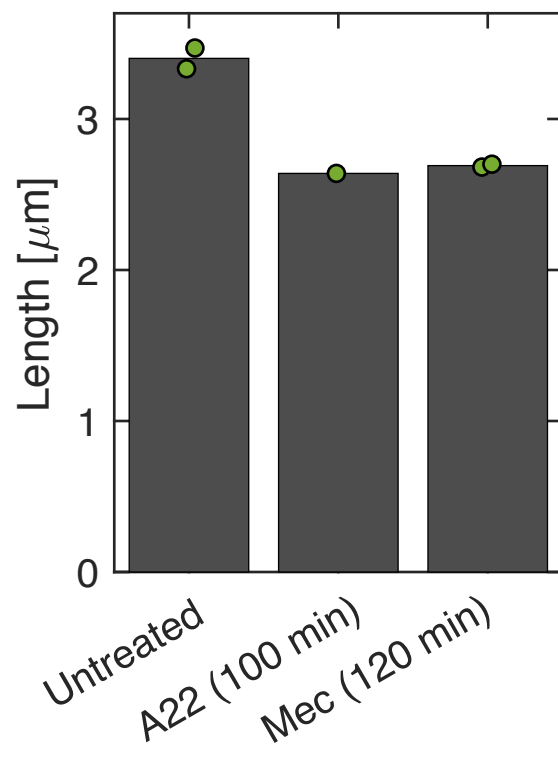

Supplement: supp [file elife-50629-supp-v1.zip]

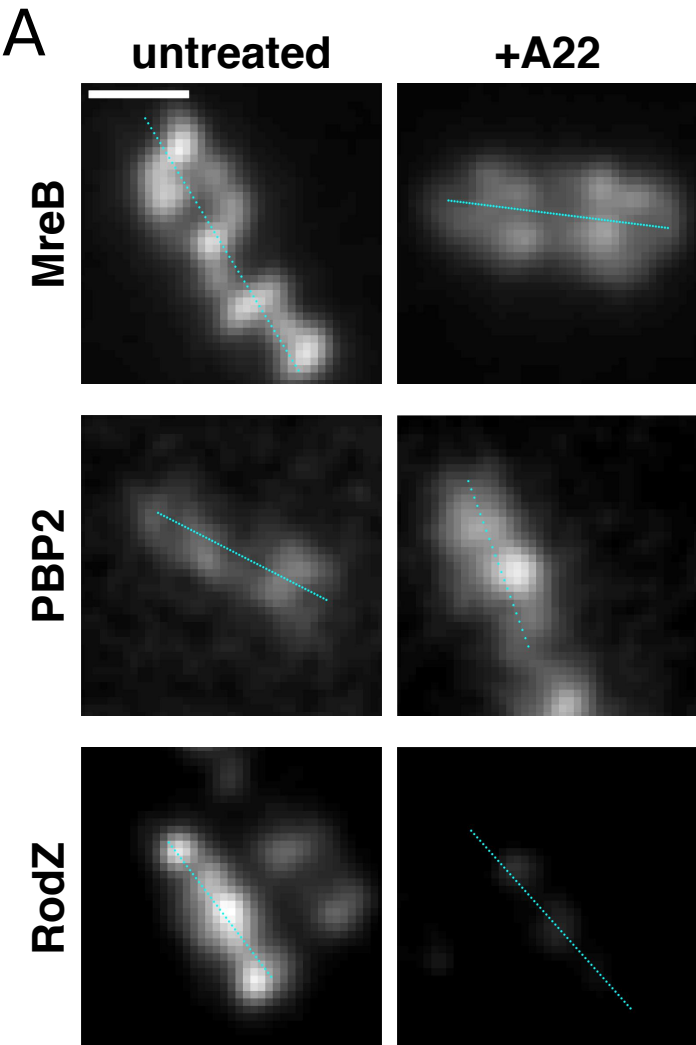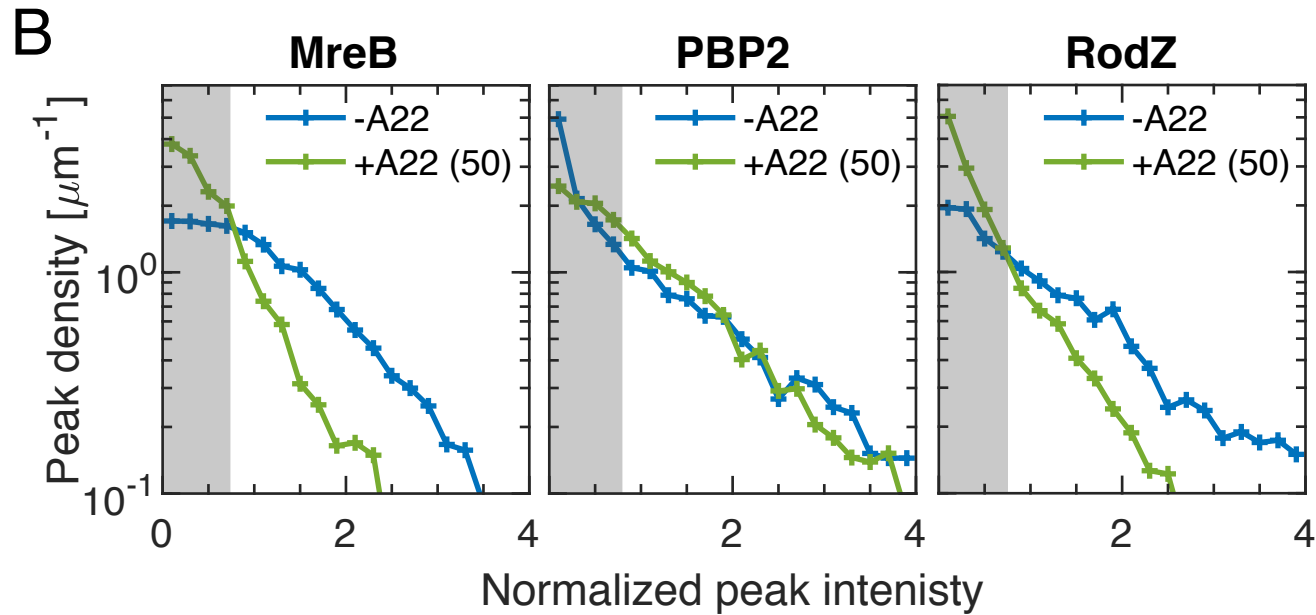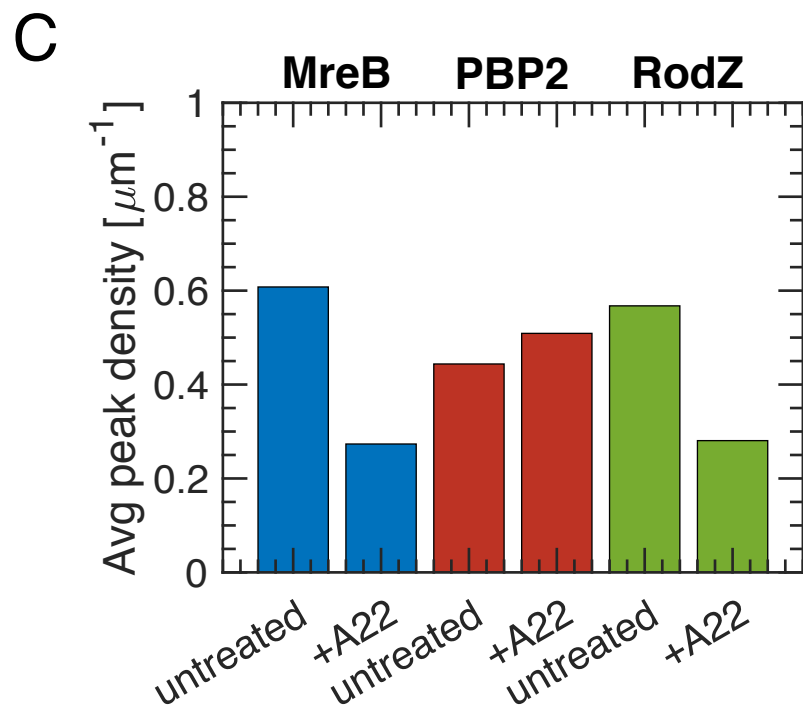

Supplement: supp [file elife-50629-supp-v1.zip]

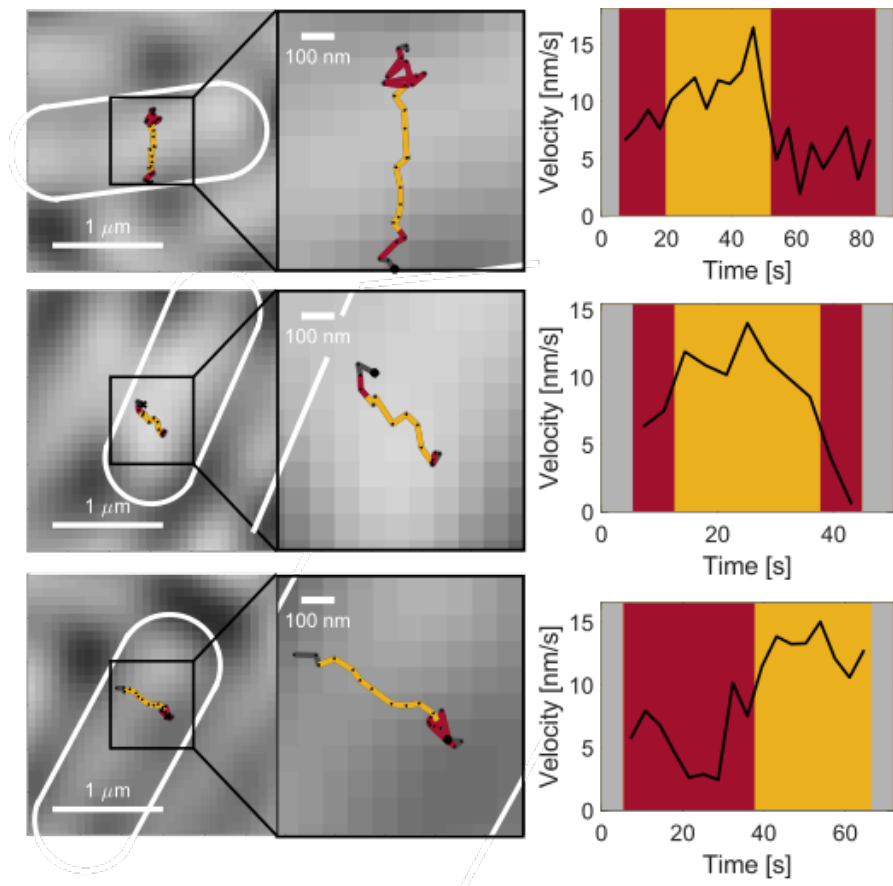

Supplement: supp [file elife-50629-supp-v1.zip]

**A**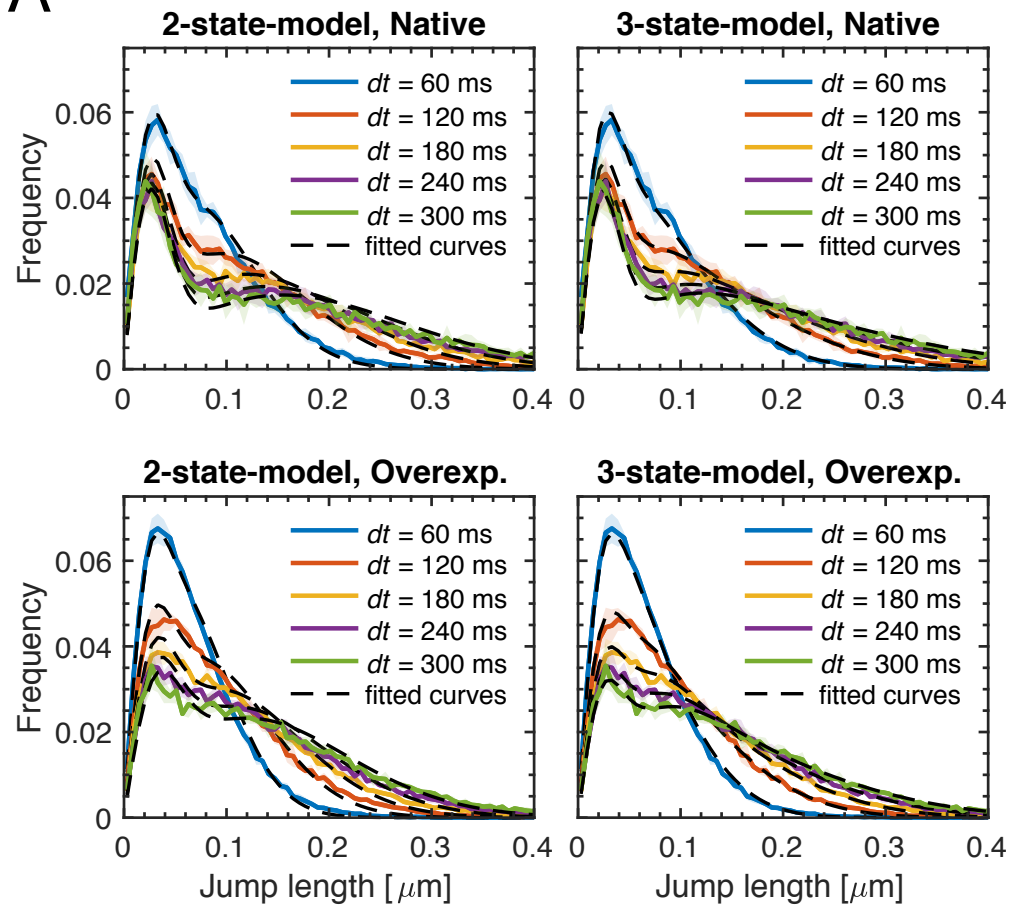**B**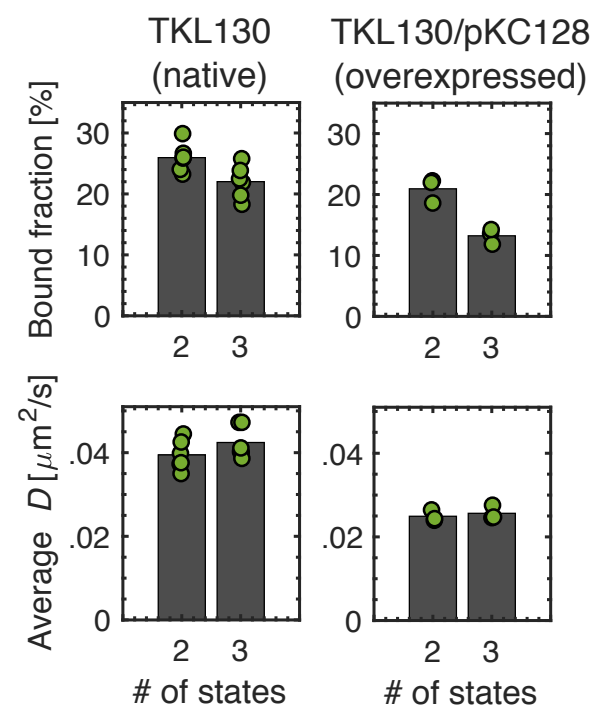**C**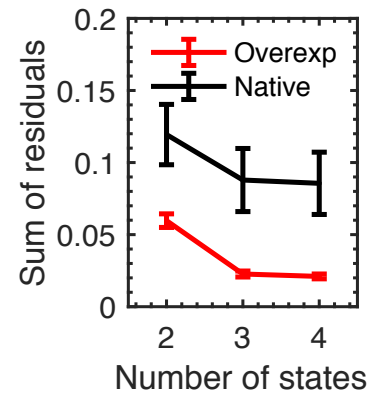

Supplement: supp [file elife-50629-supp-v1.zip]

**A**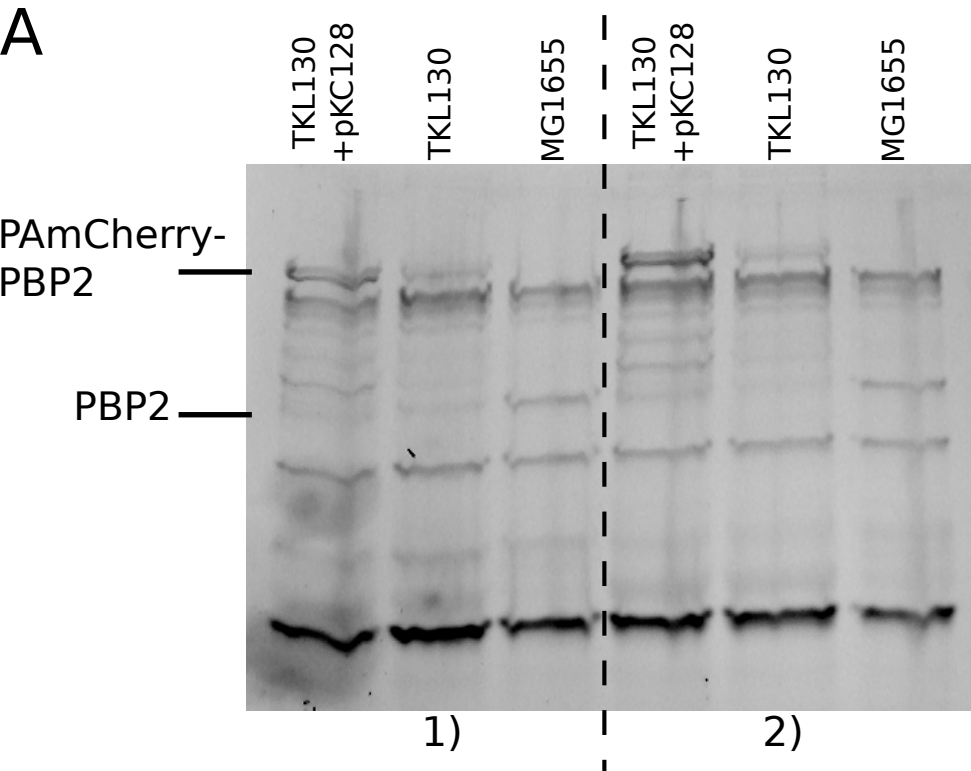**B**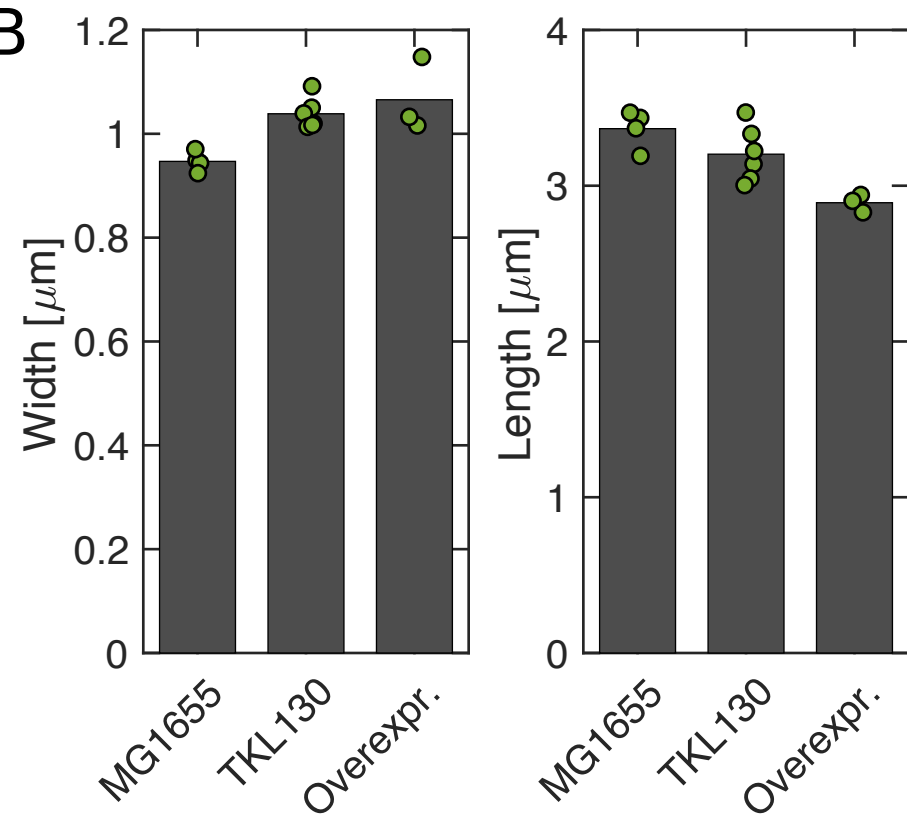**C**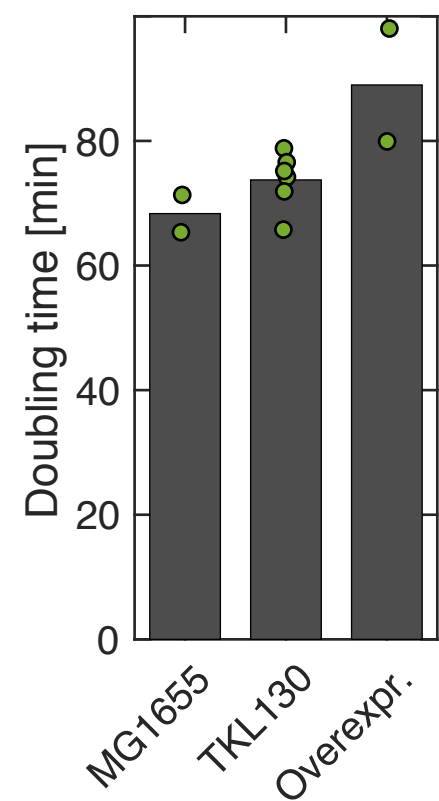**D**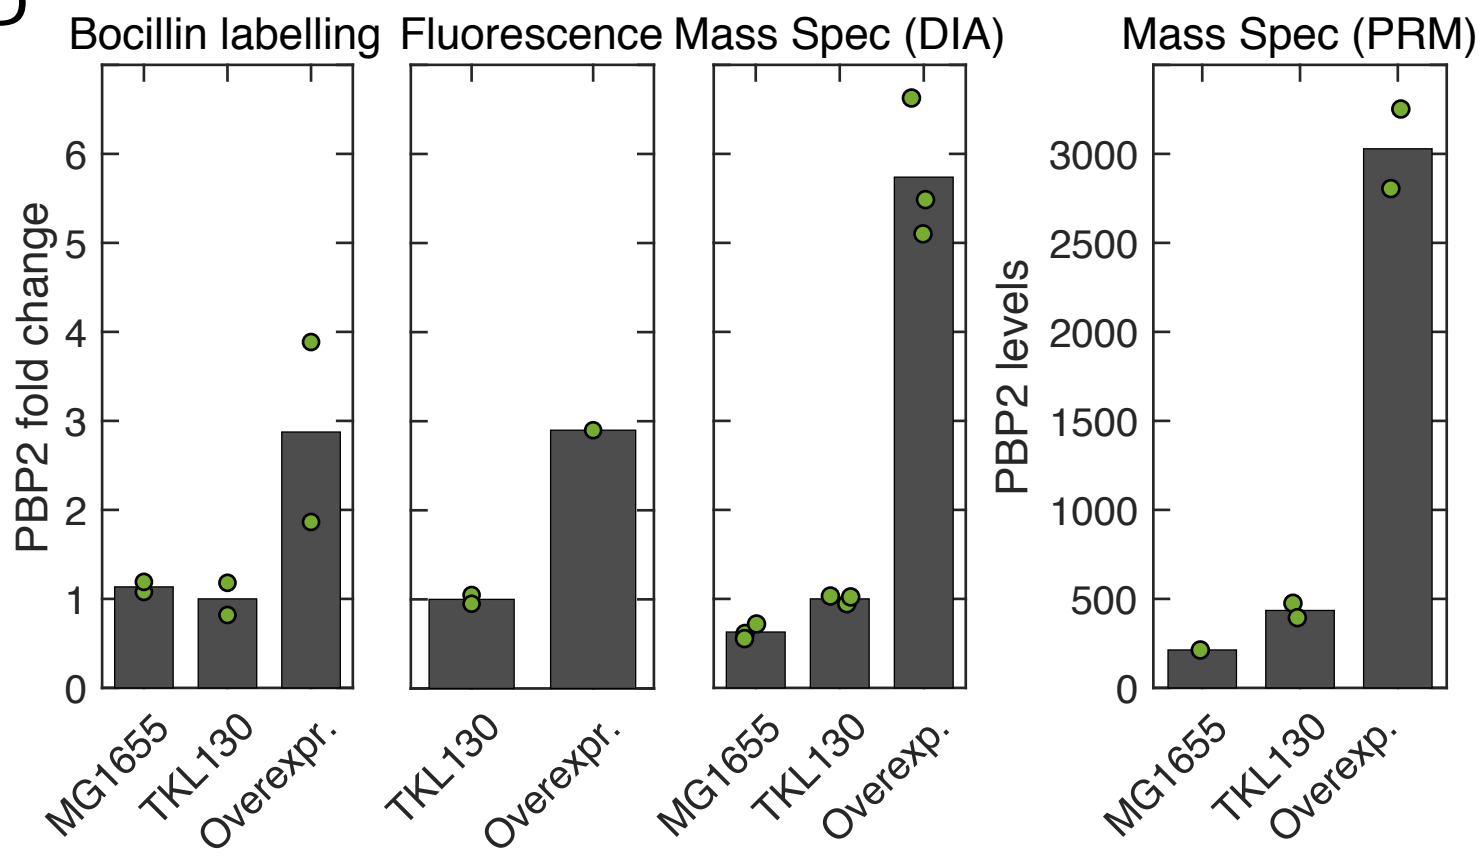

Supplement: supp [file elife-50629-supp-v1.zip]

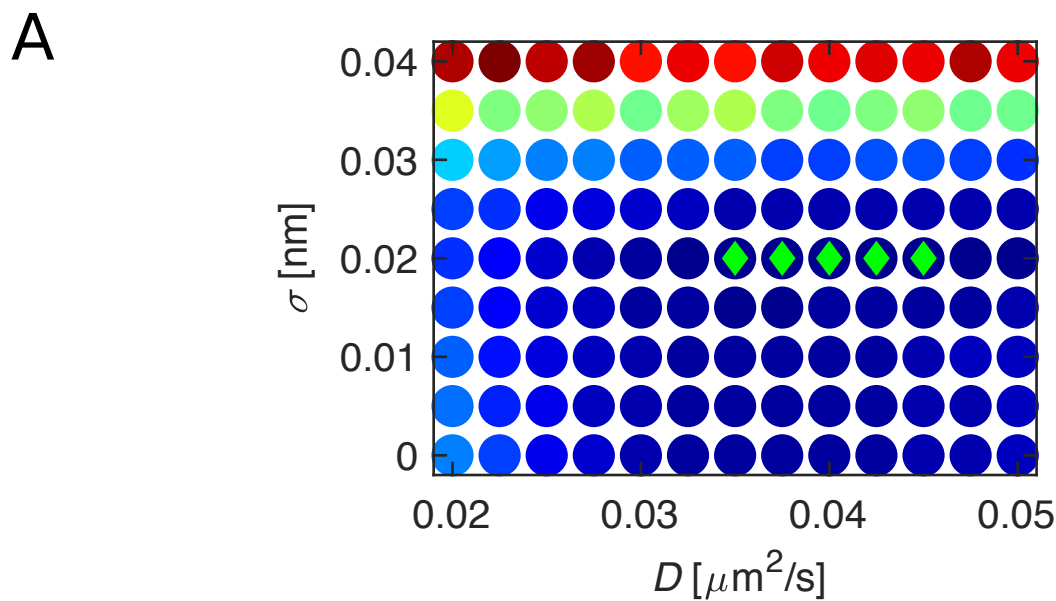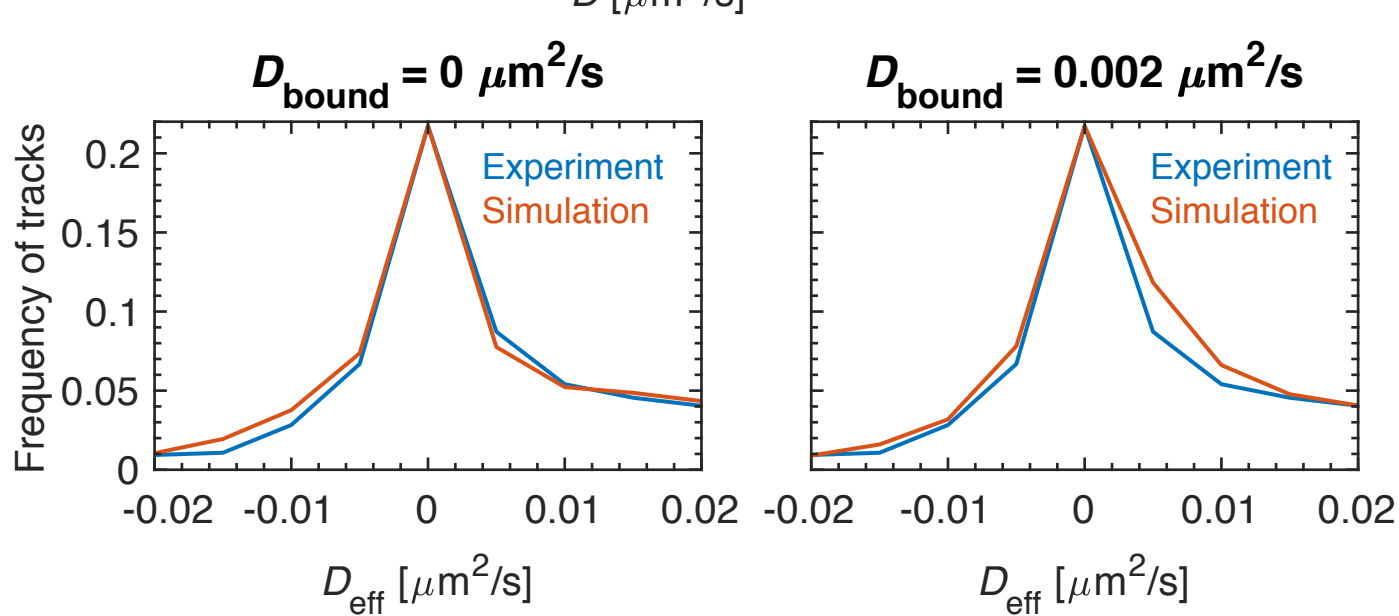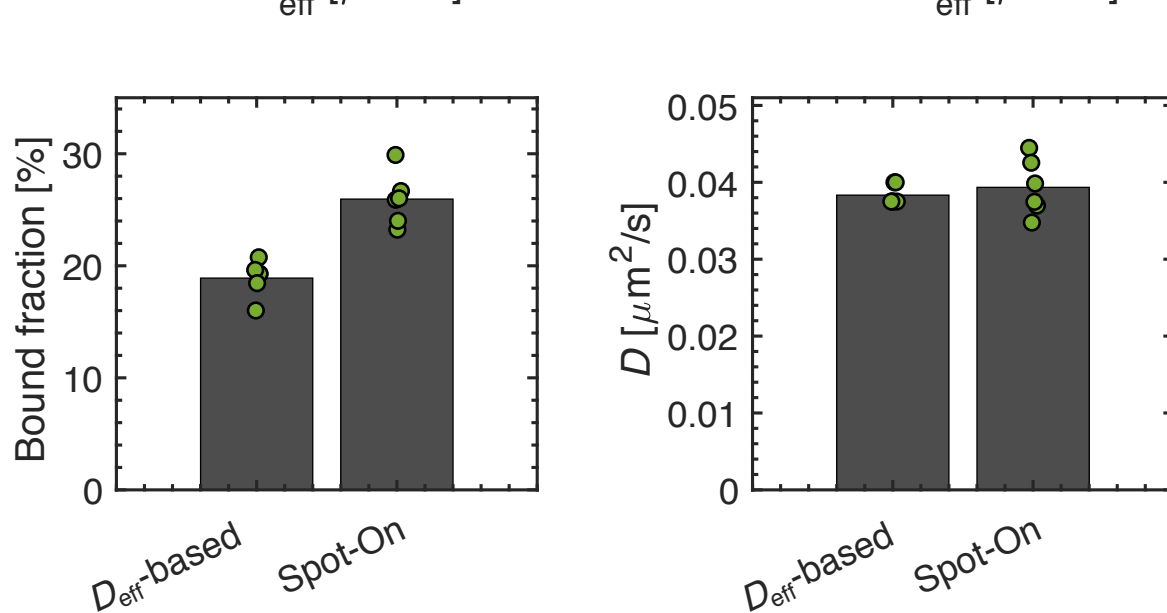

Supplement: supp [file elife-50629-supp-v1.zip]

**A**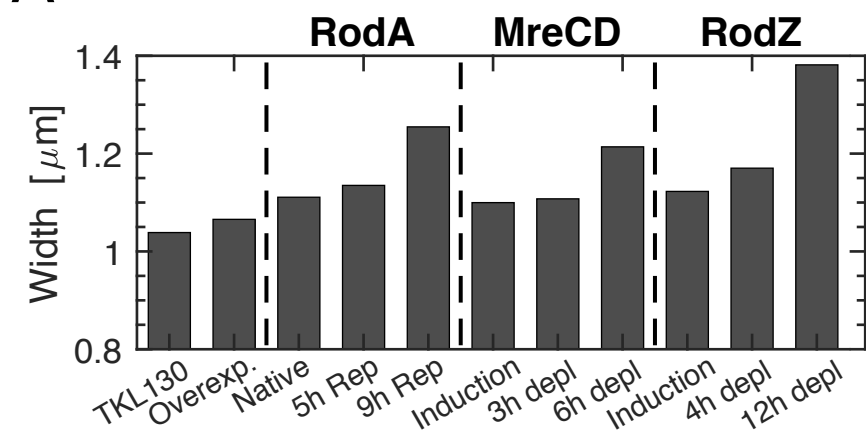**B**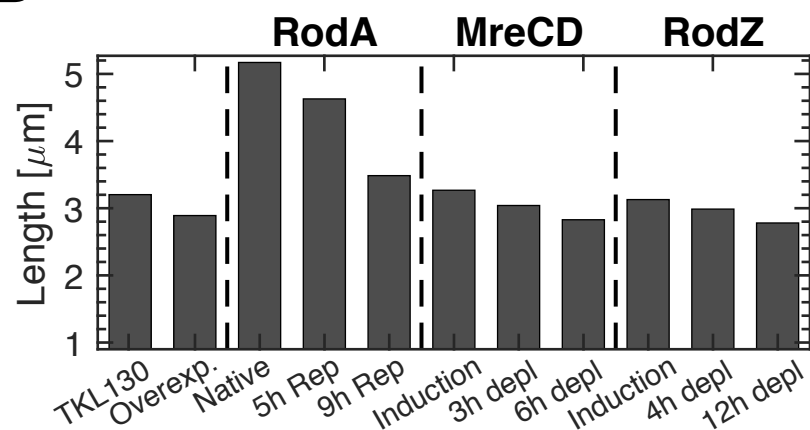**C**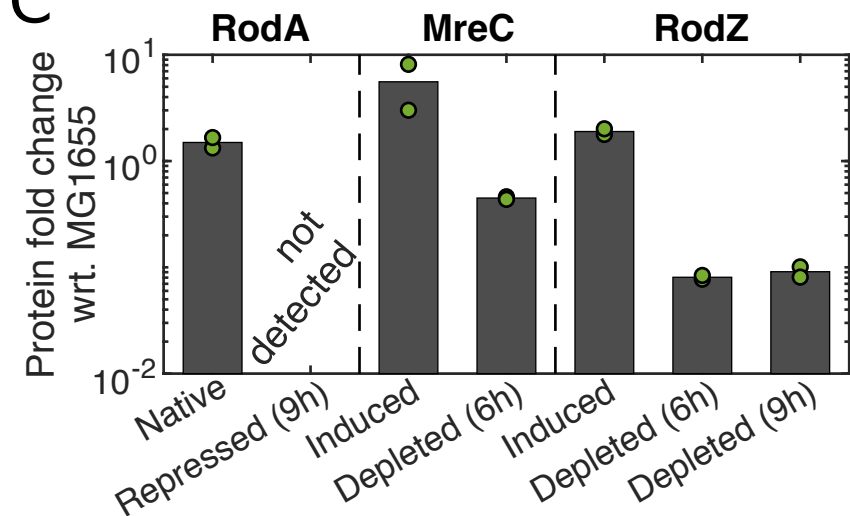**D**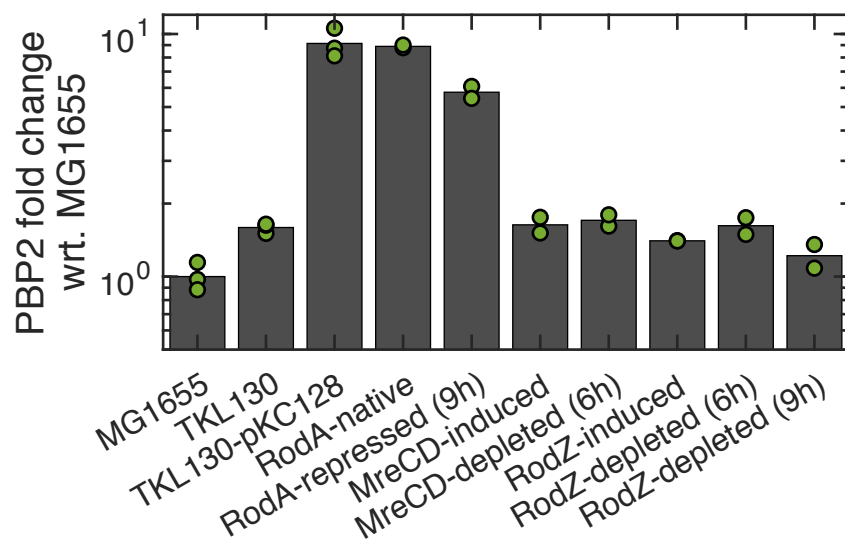**E**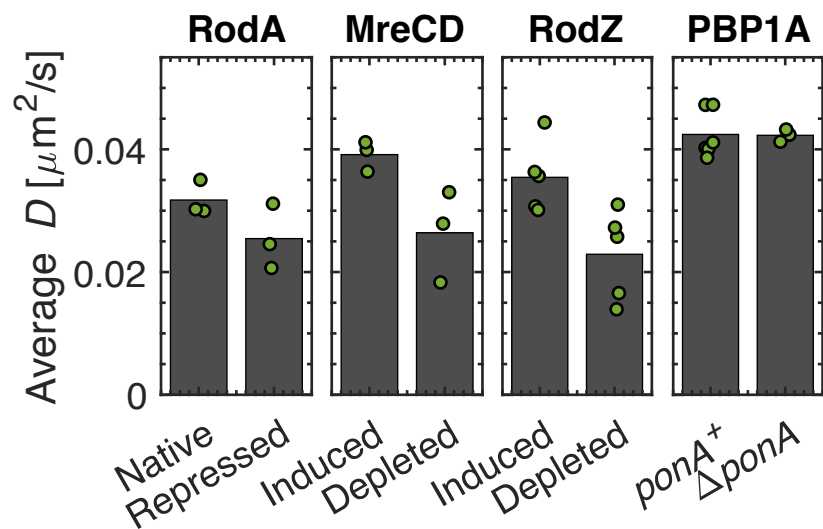**F**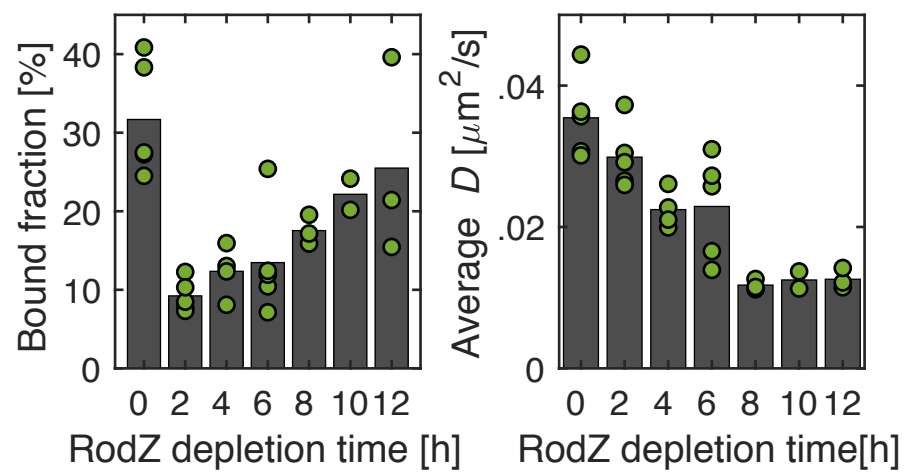

Supplement: supp [file elife-50629-supp-v1.zip]

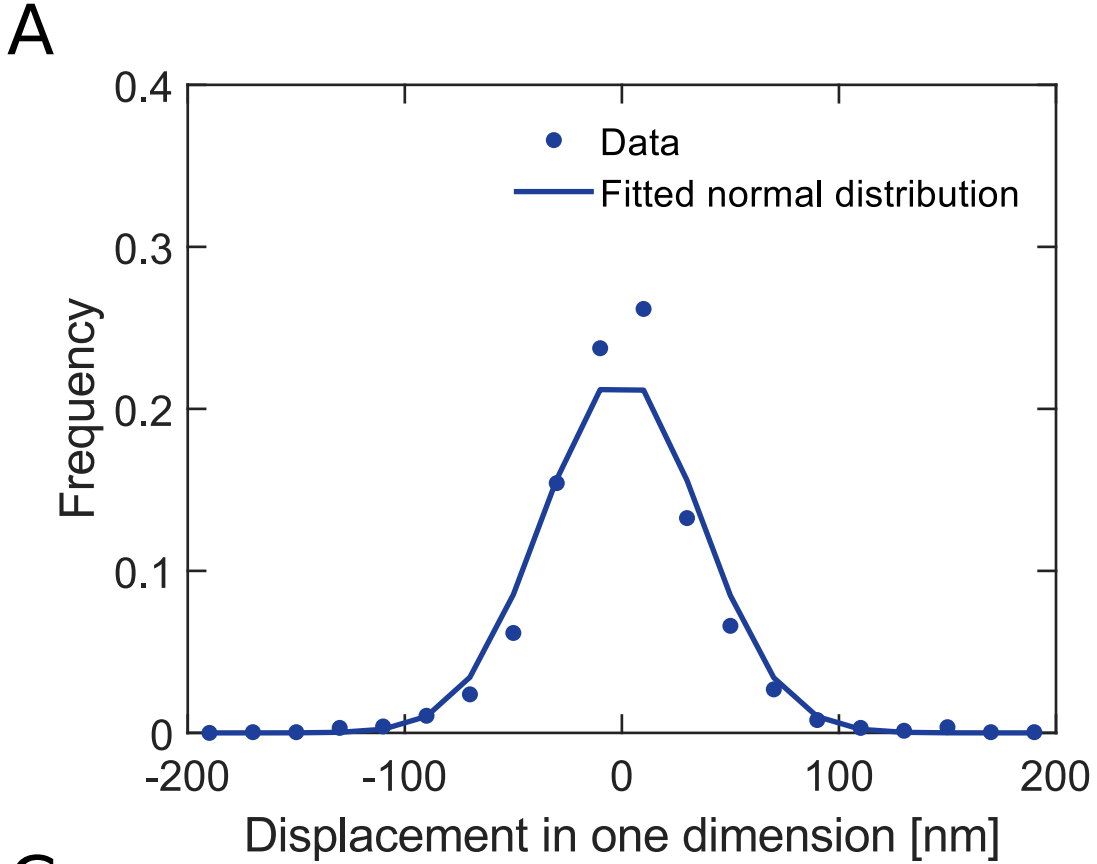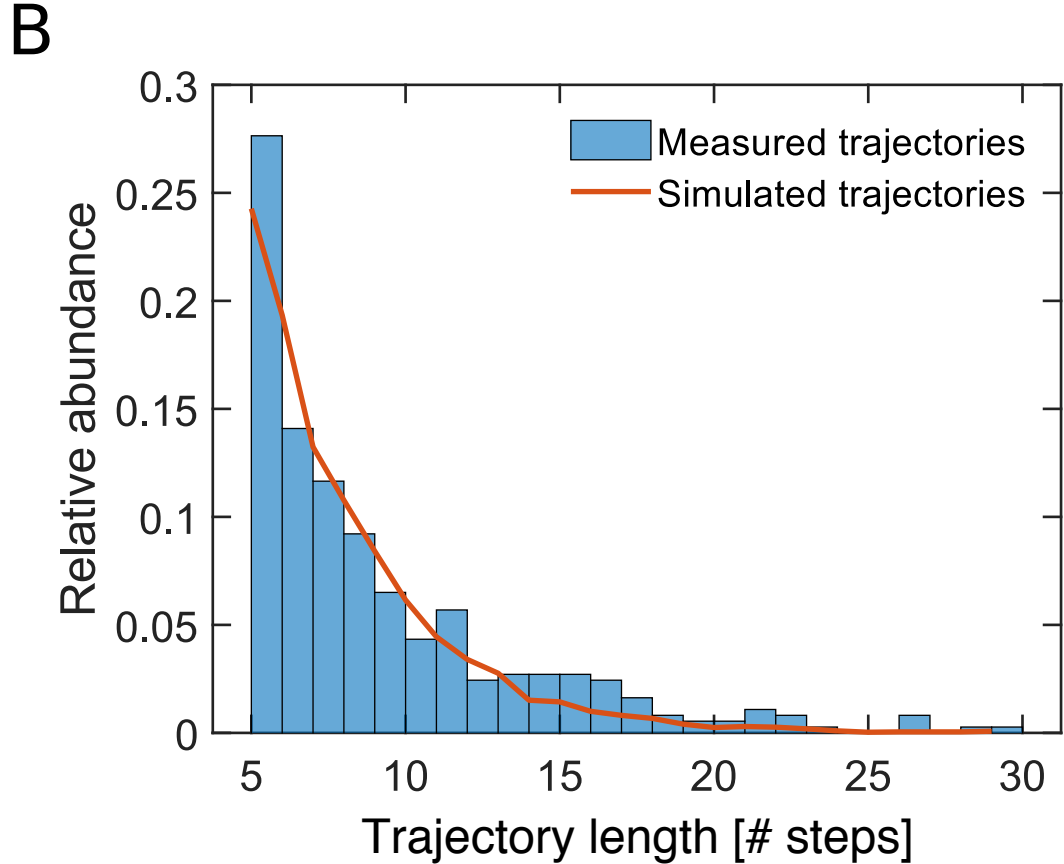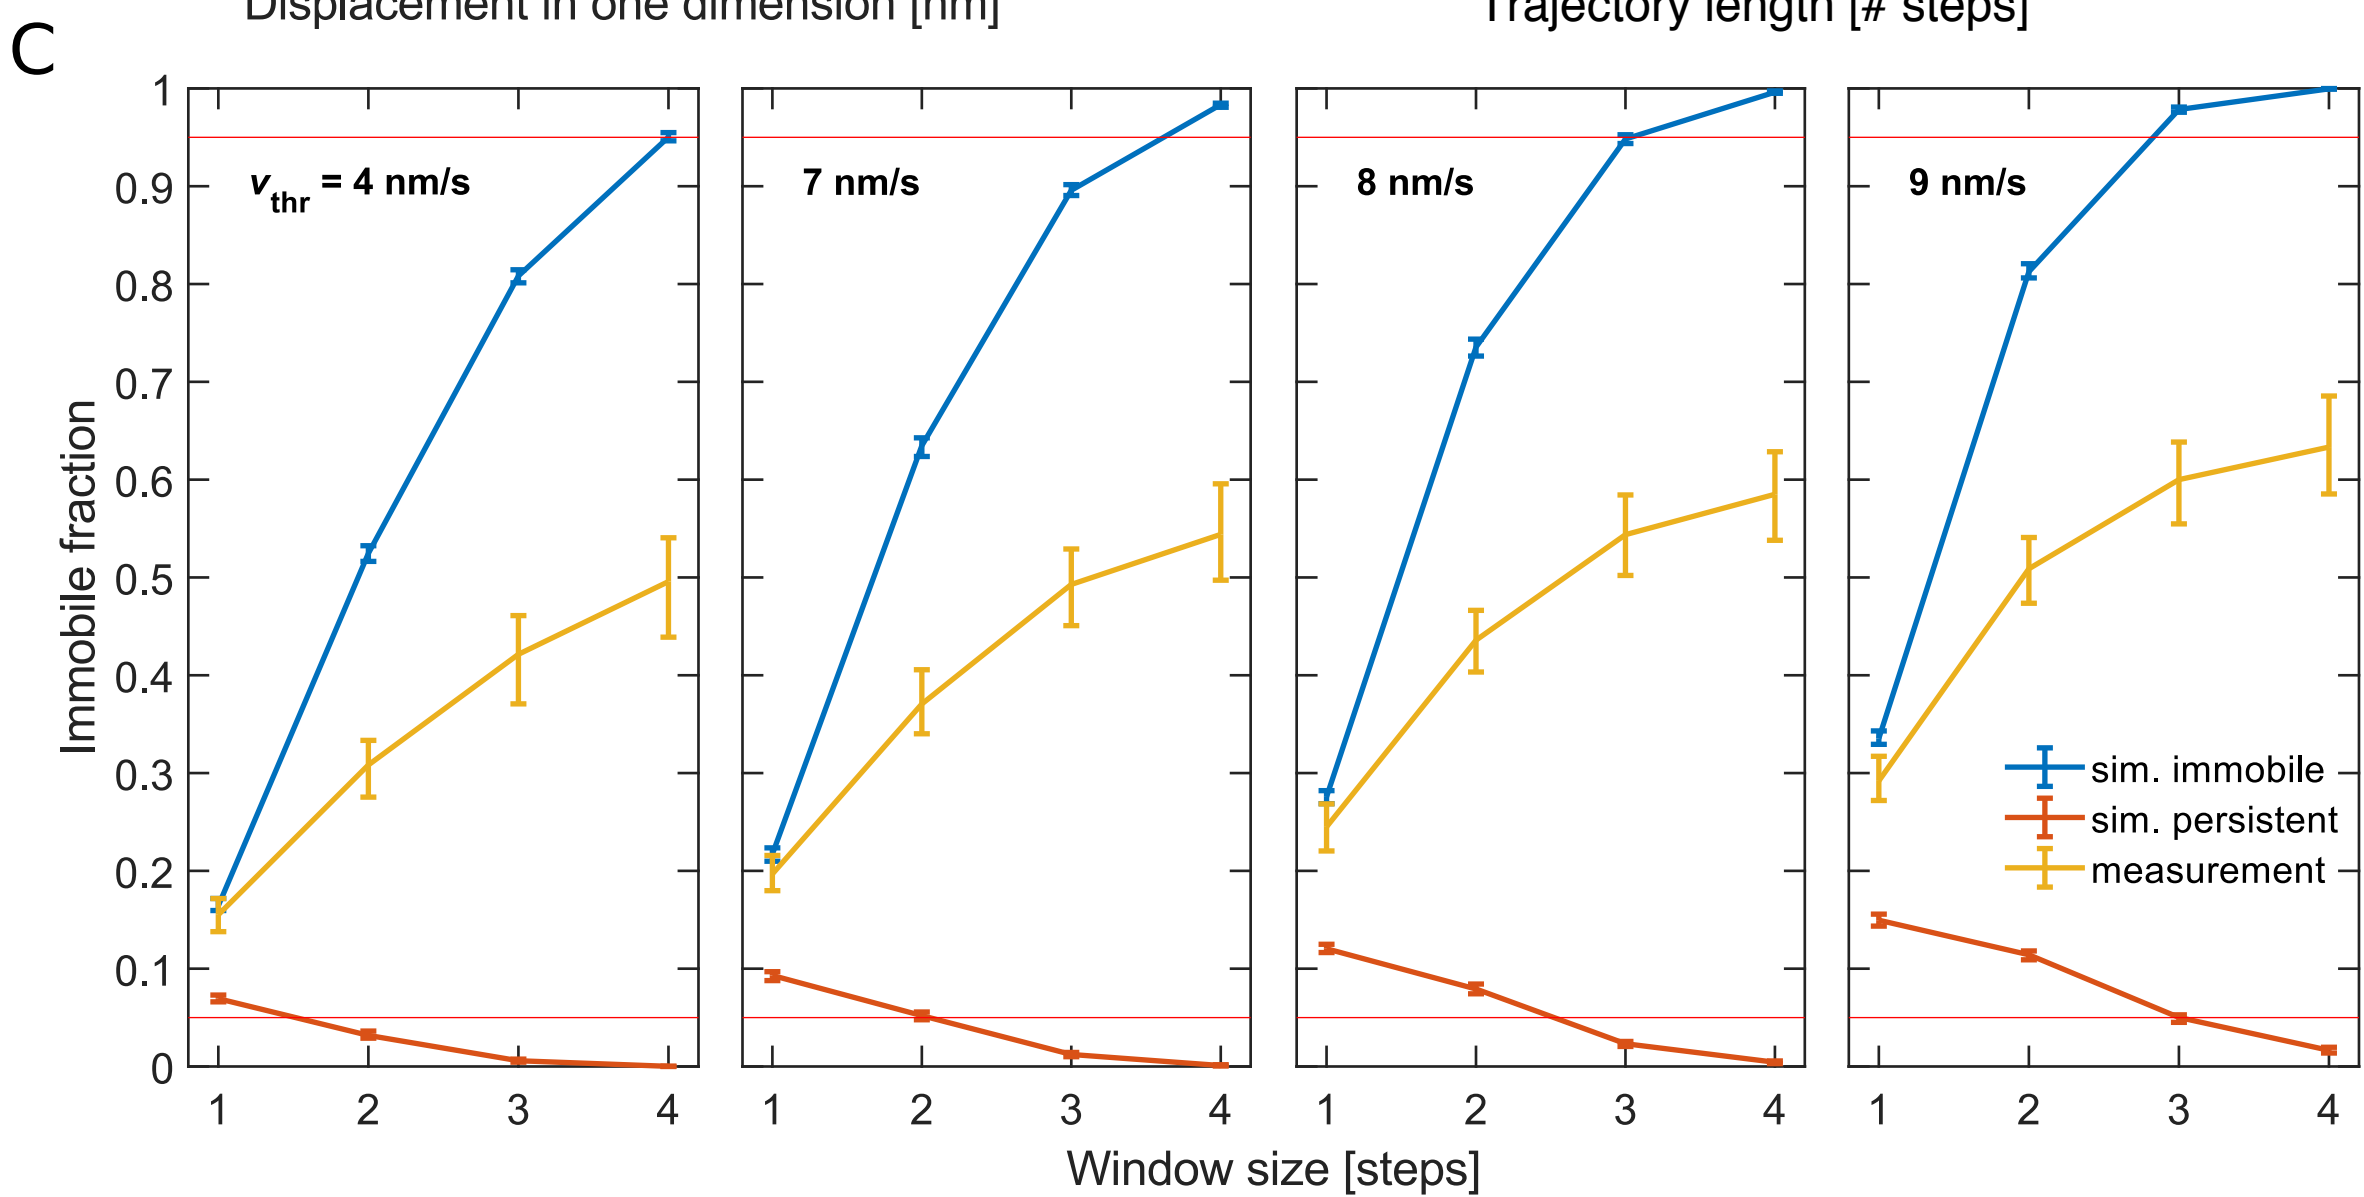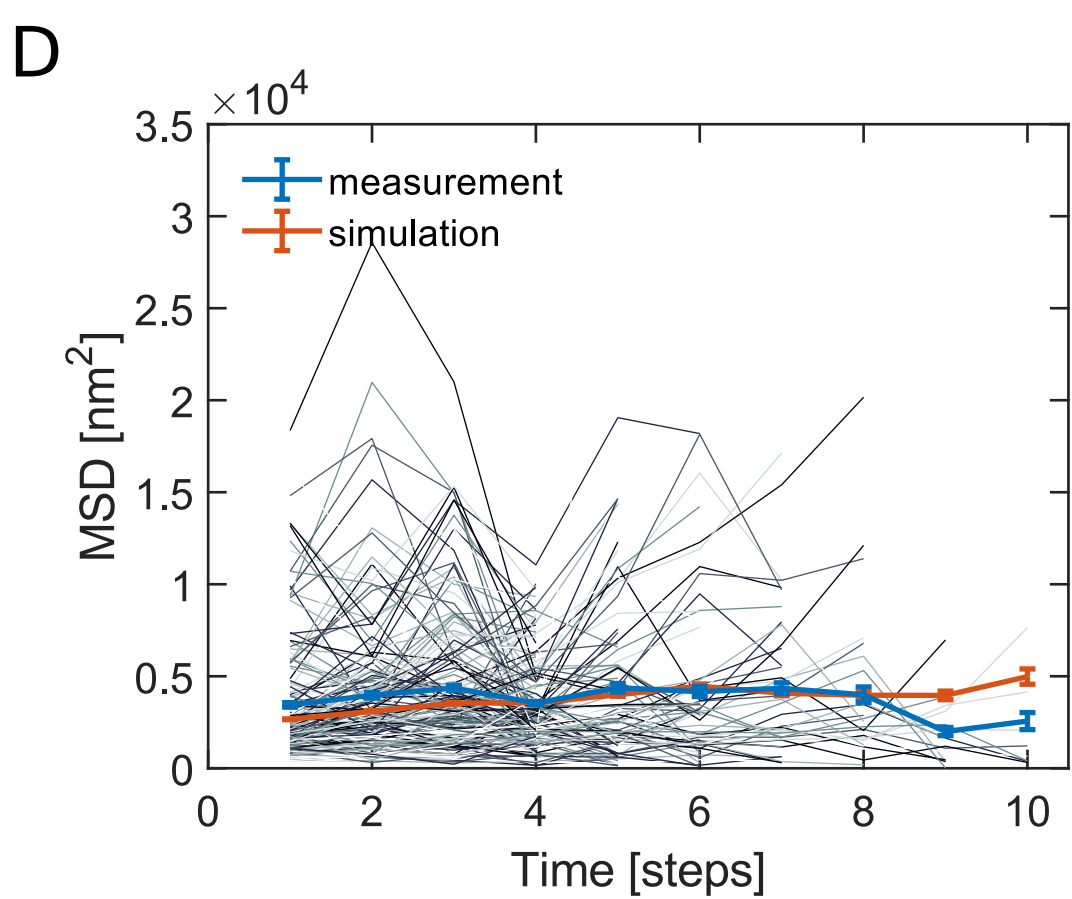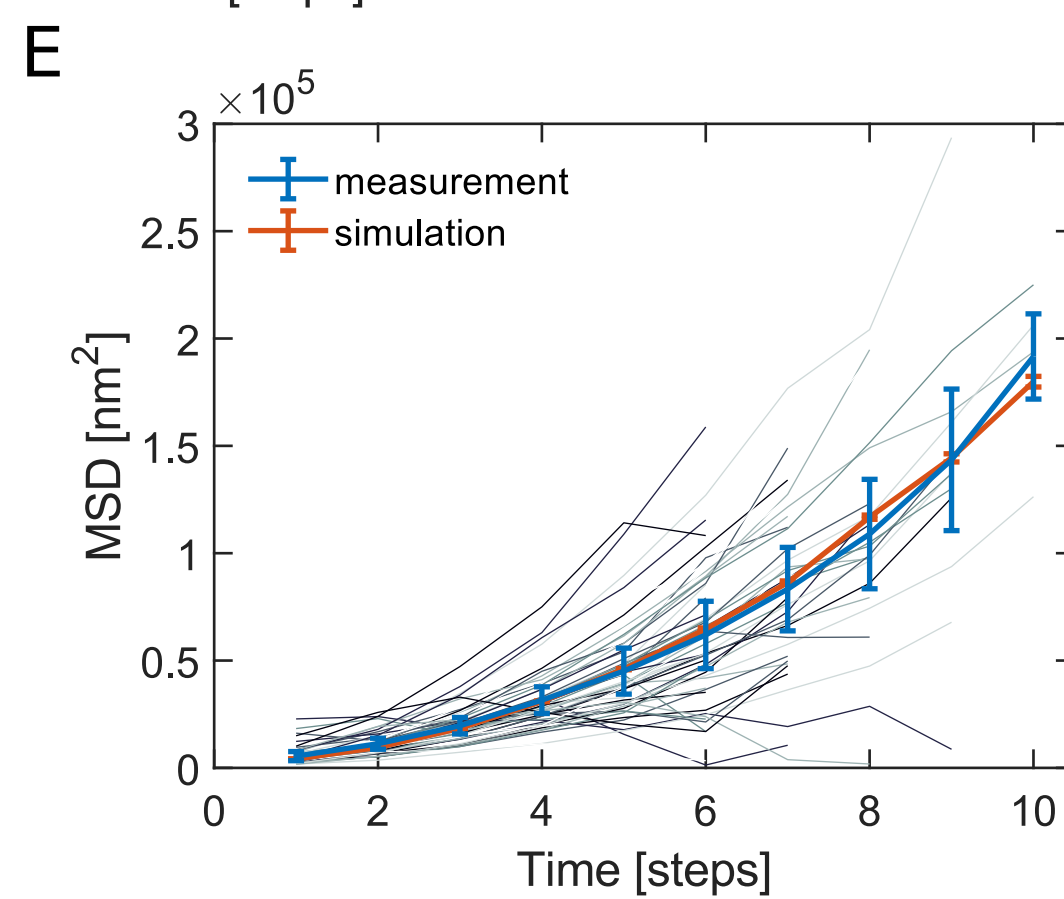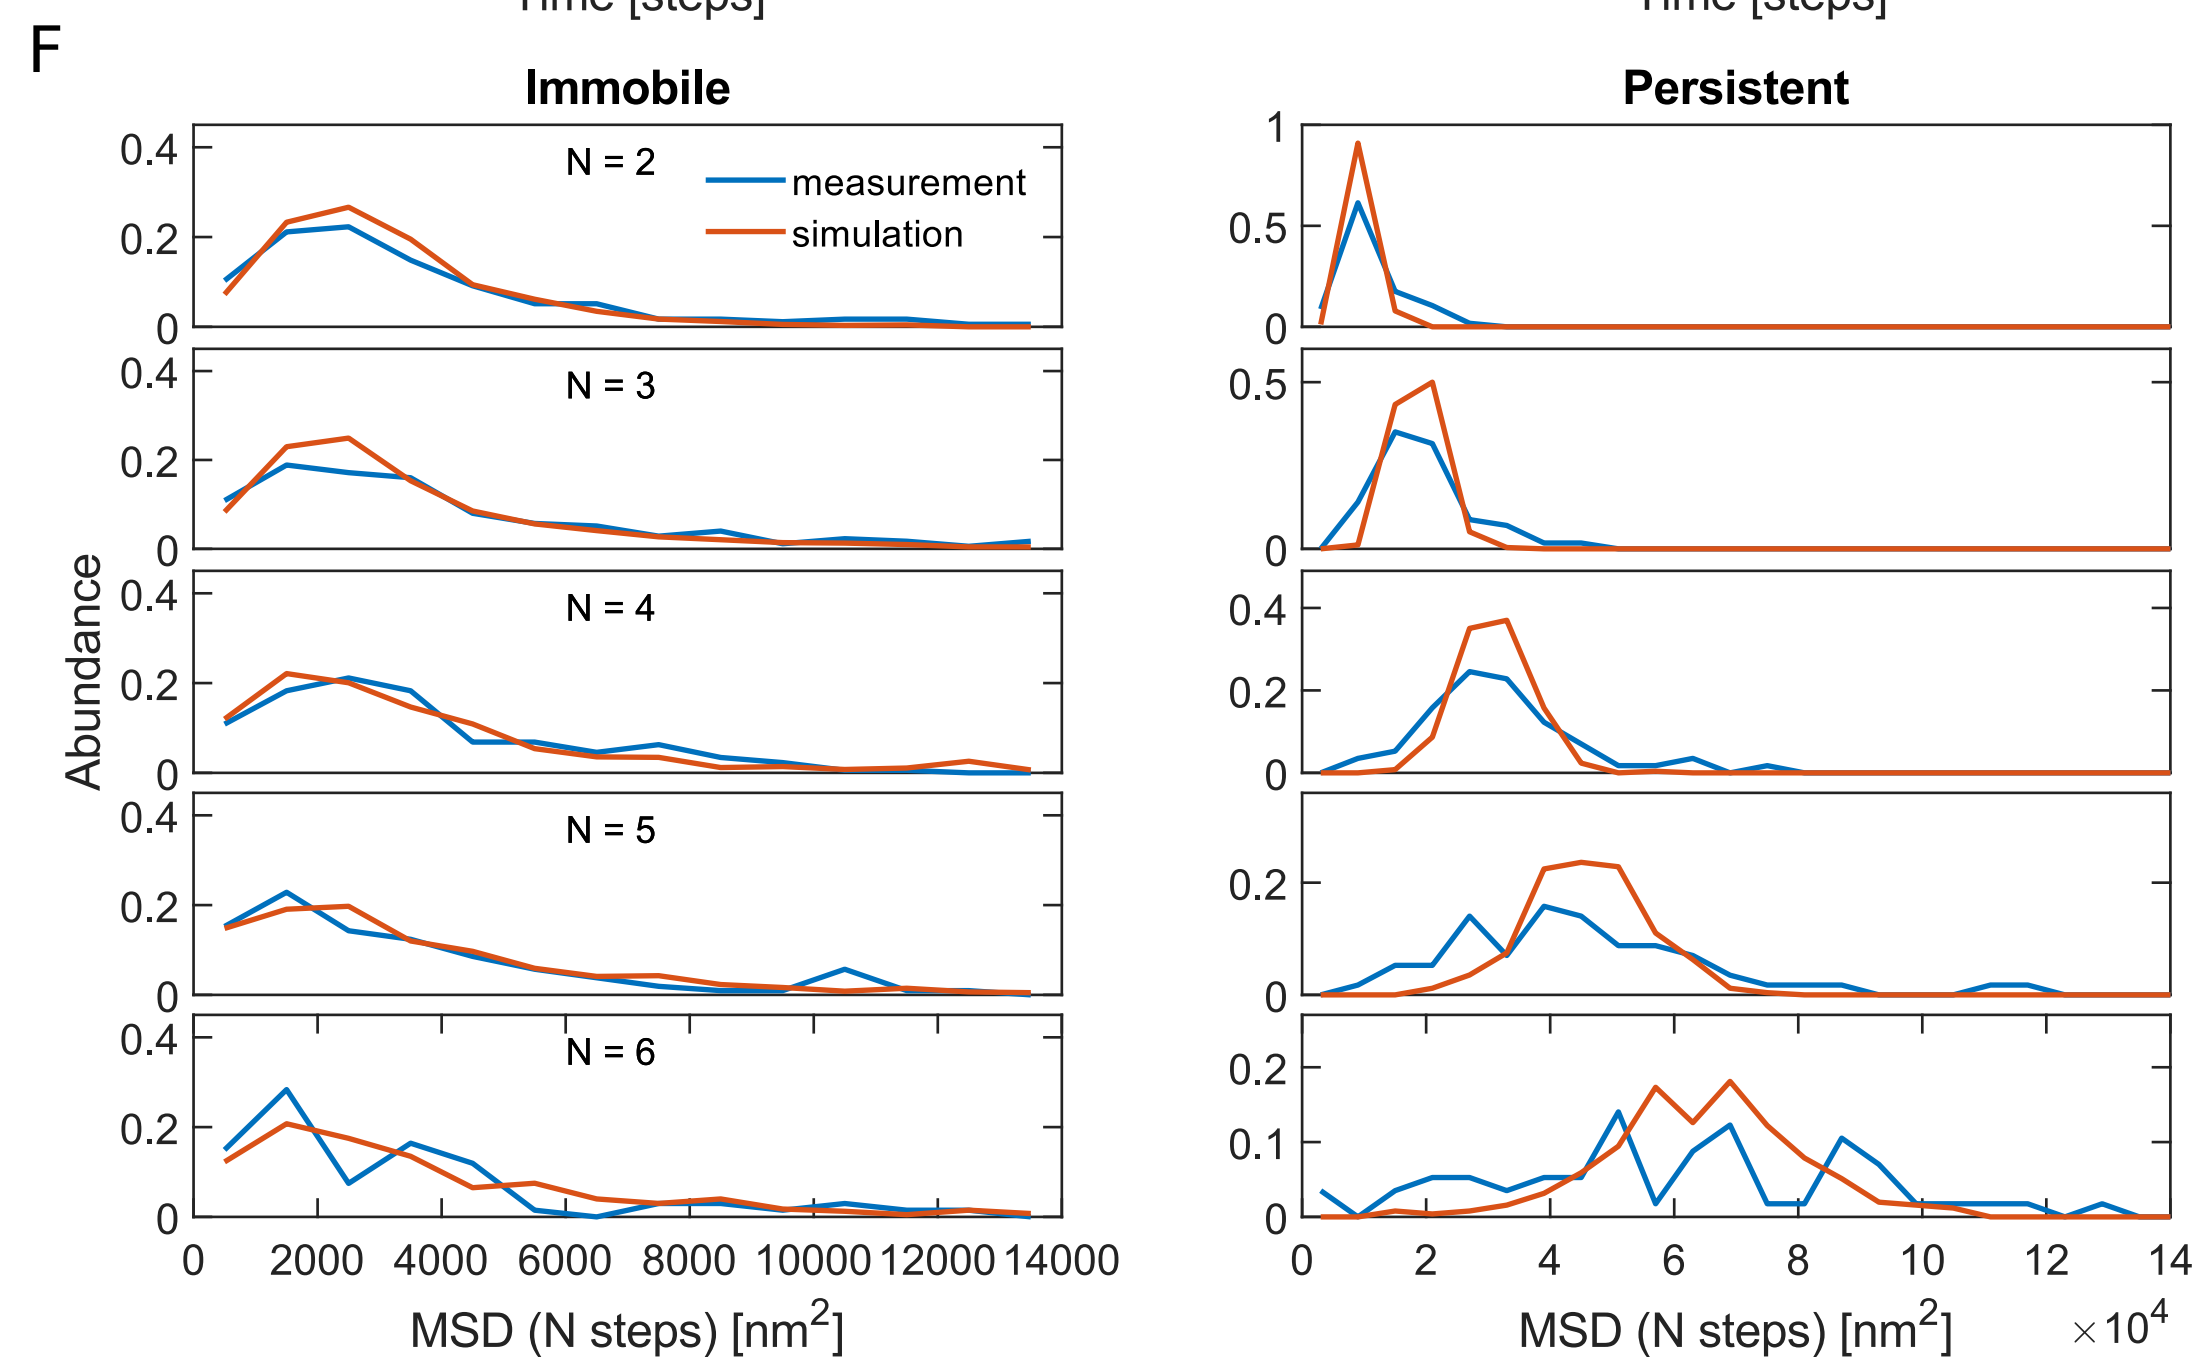

Supplement: supp [file elife-50629-supp-v1.zip]

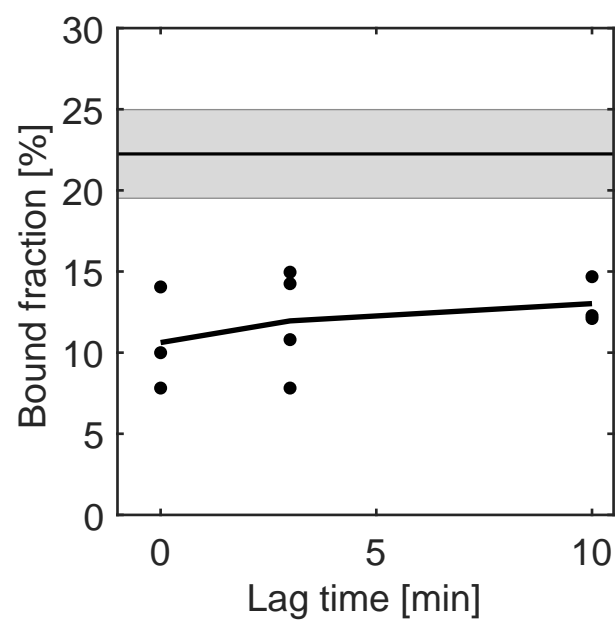

Supplement: supp [file elife-50629-supp-v1.zip]

**+A22**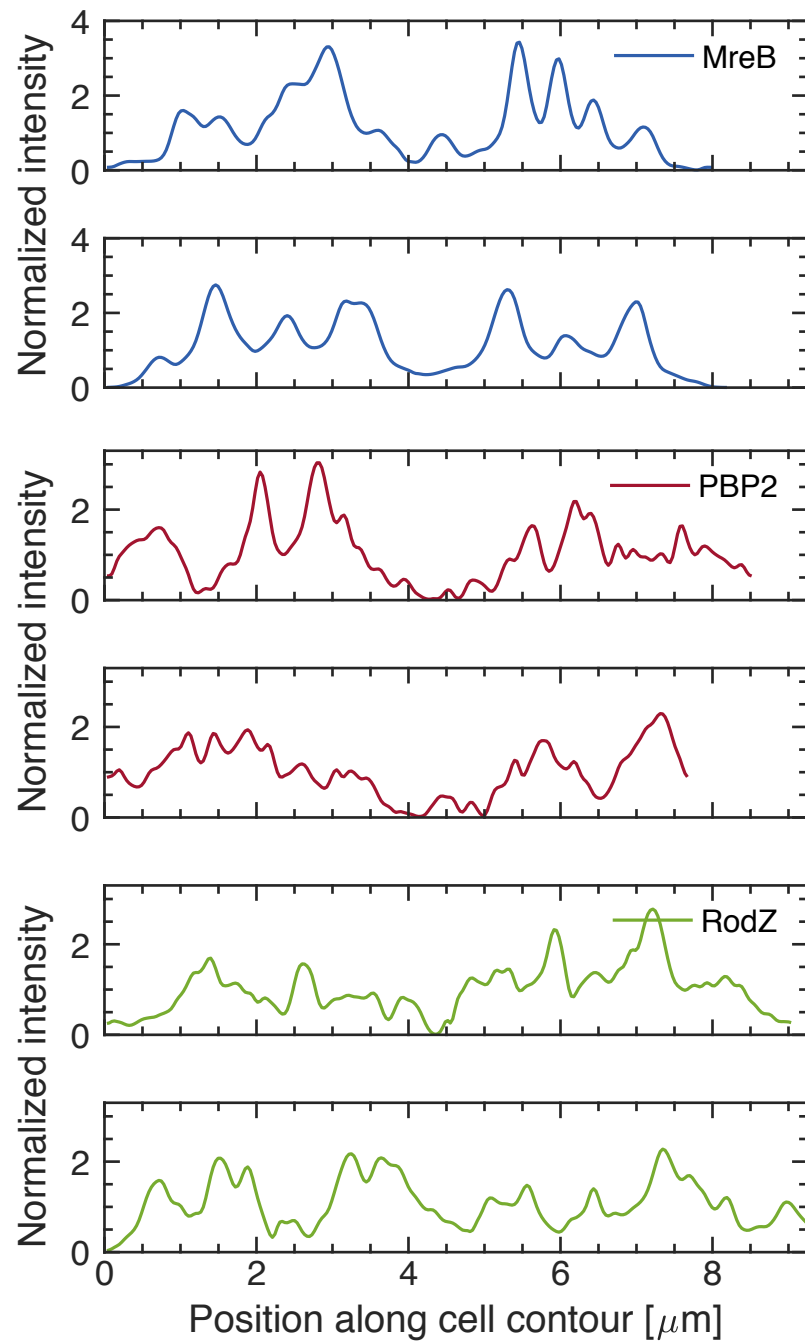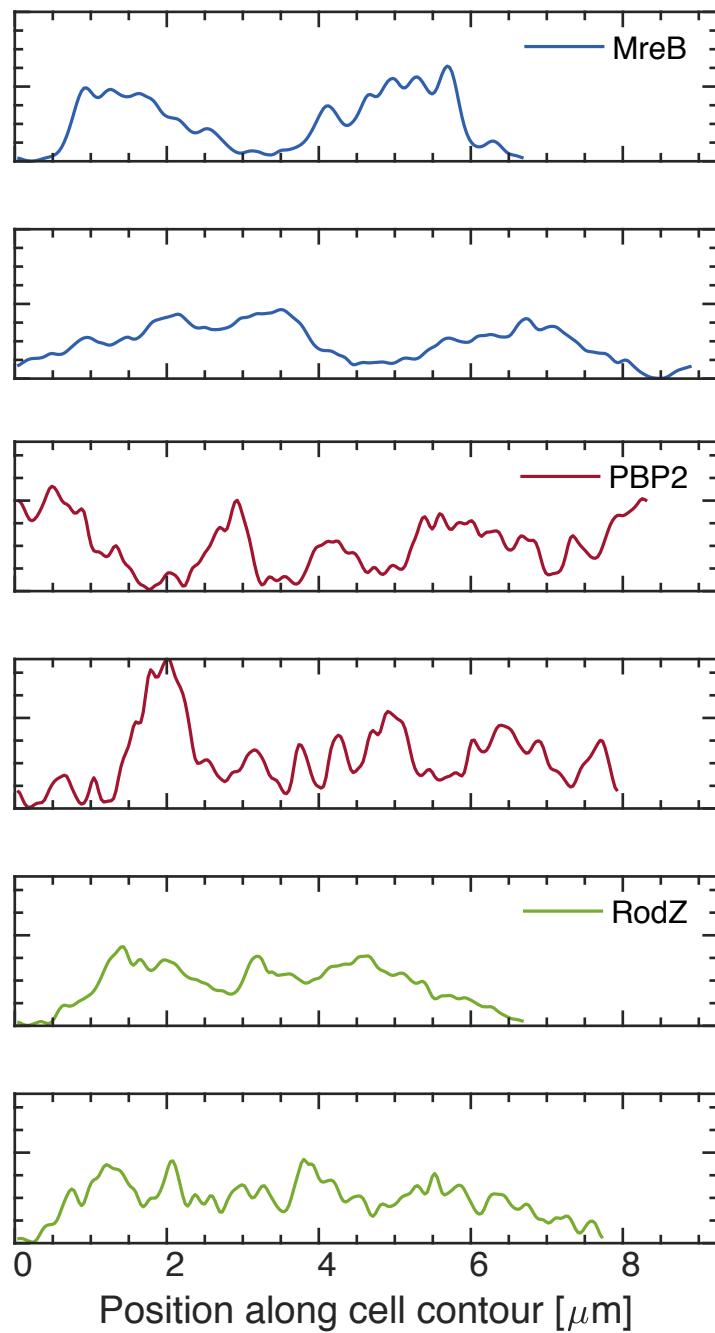

Supplement: supp [file elife-50629-supp-v1.zip]

**A**

Side walls vs  
curvature corrected

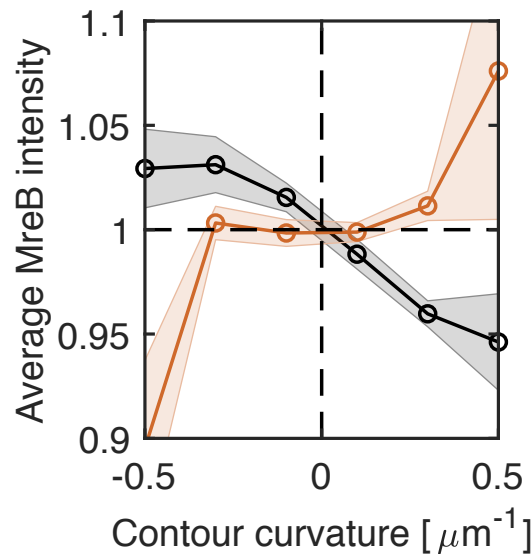**B**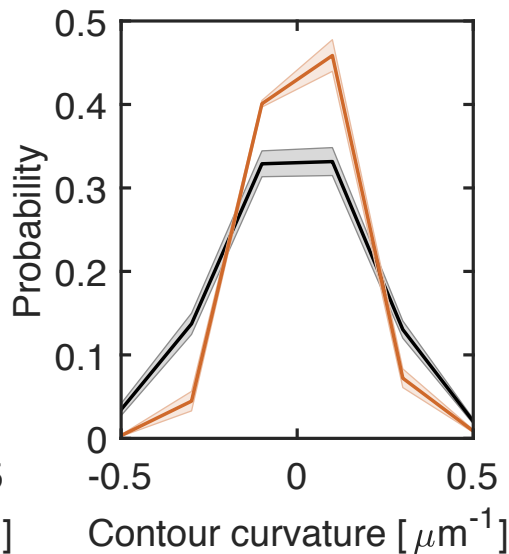**C**

Side walls vs  
intensity corrected

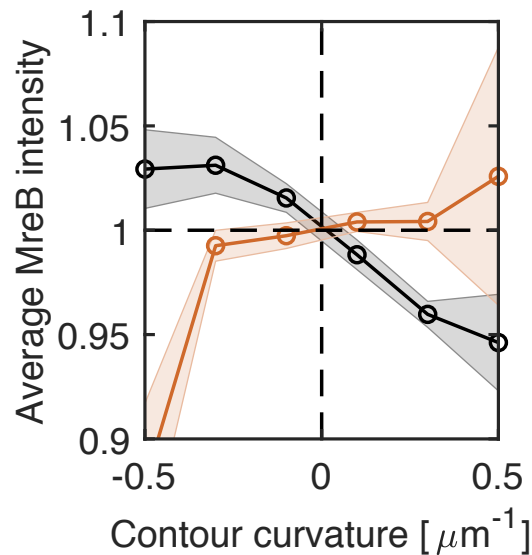**D**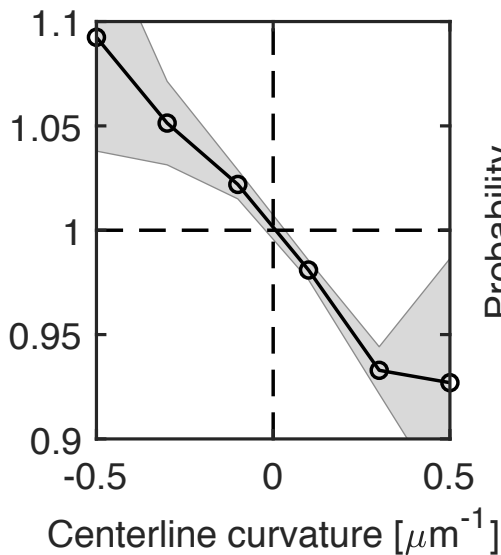**E**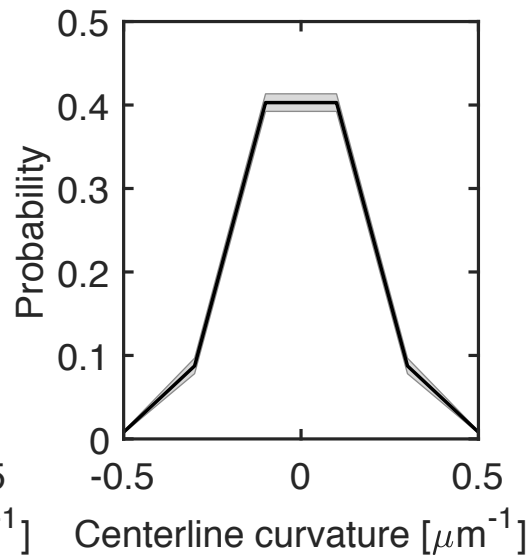

Supplement: supp [file elife-50629-supp-v1.zip]

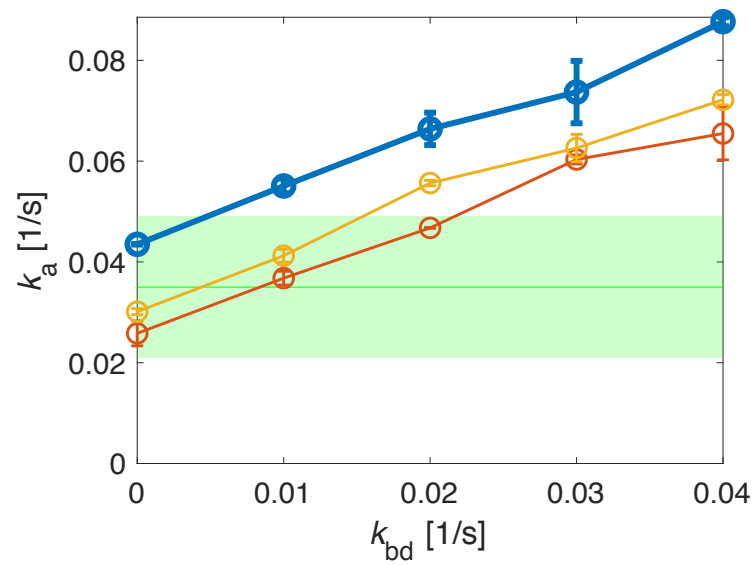

Supplement: supp [file elife-50629-supp-v1.zip]

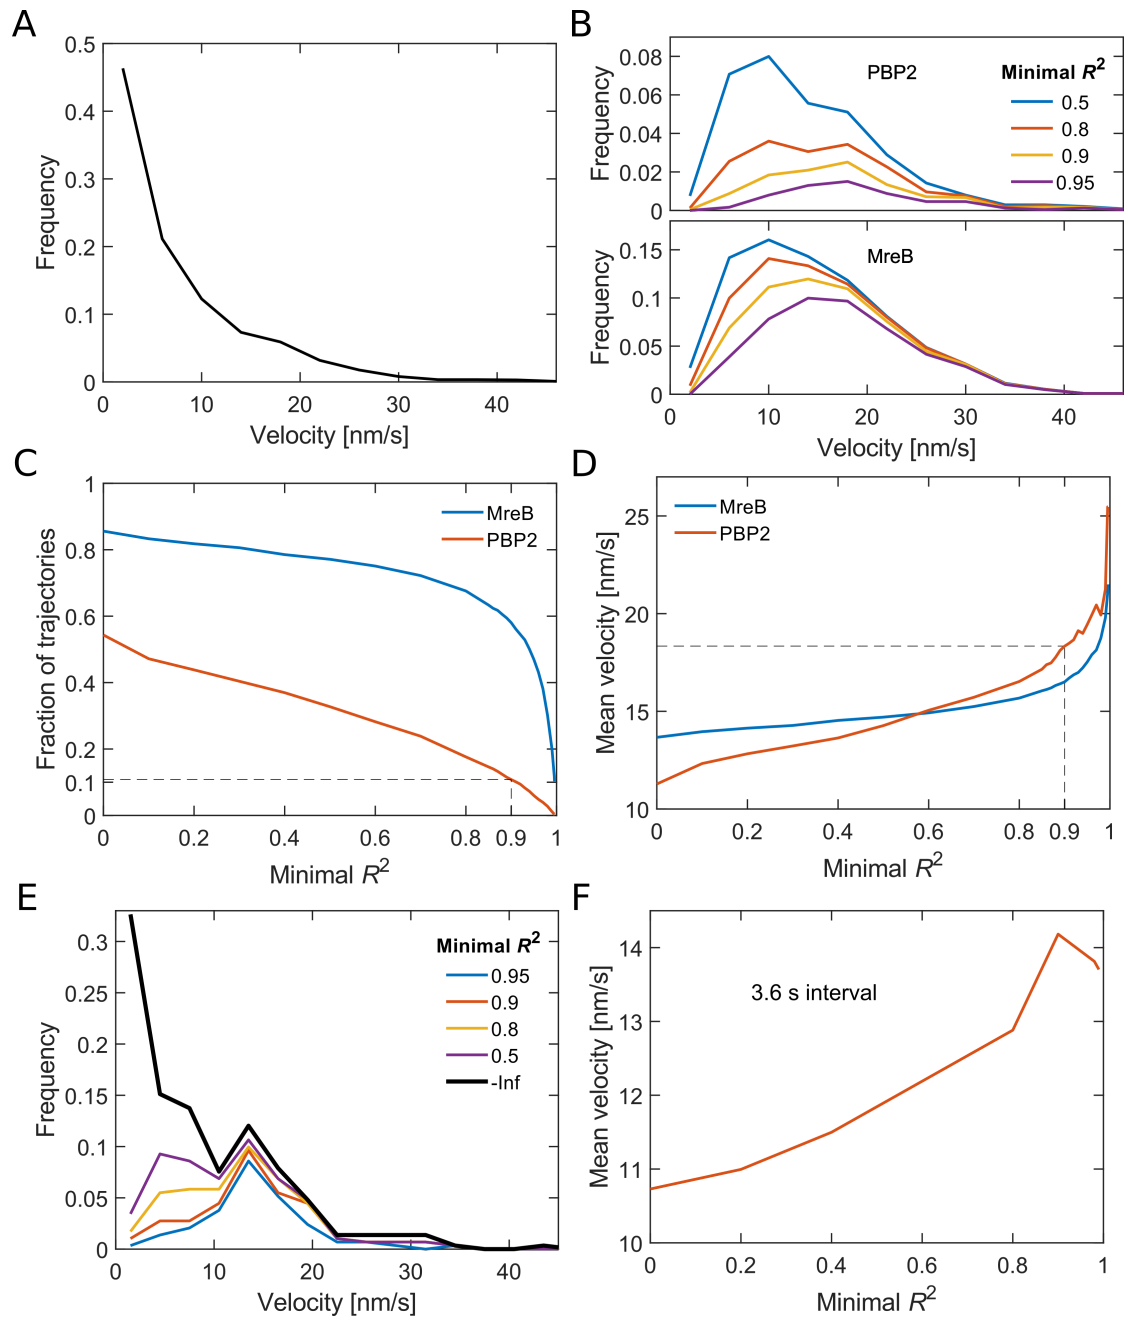

Supplement: supp [file elife-50629-supp-v1.zip]

**A**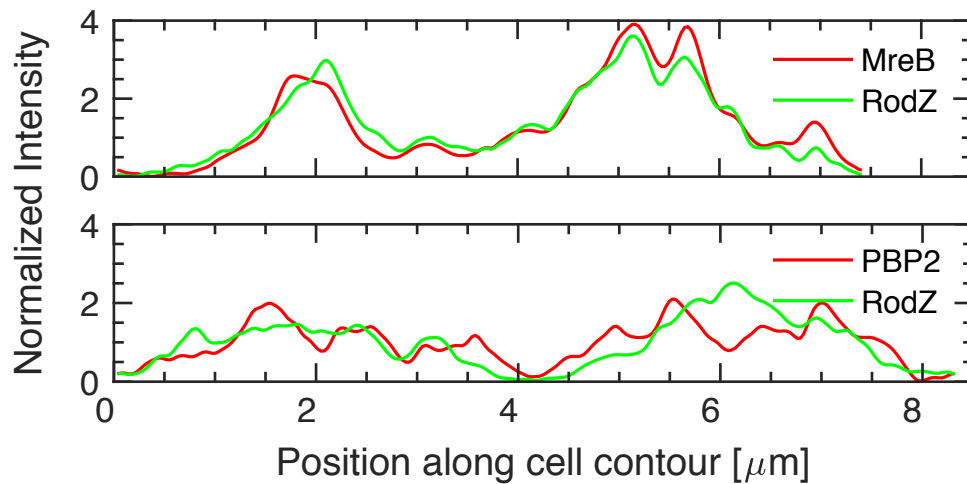**B**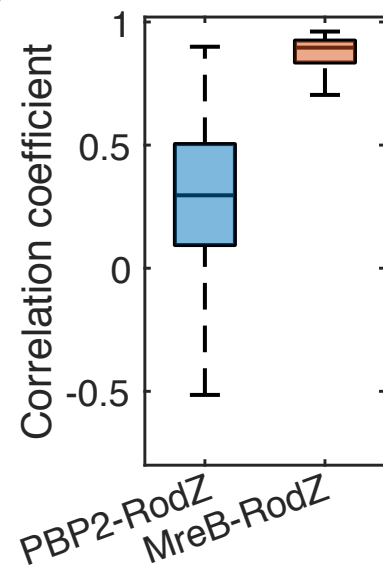**C**

GFP-RodZ MreB-mCherry

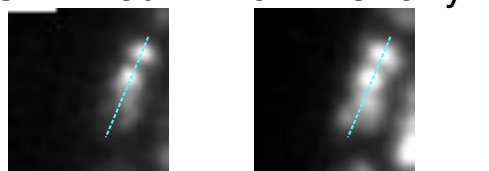

GFP-RodZ mCherry-PBP2

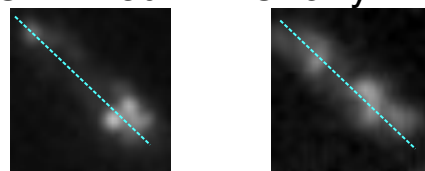**D**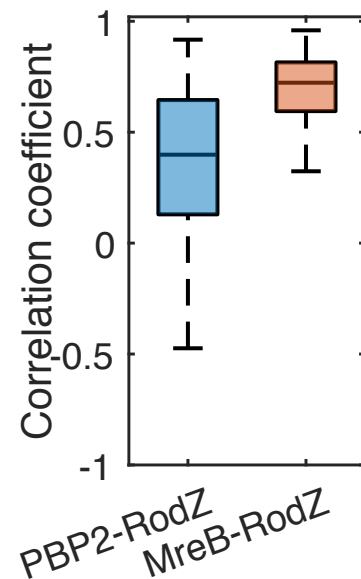

Supplement: supp [file elife-50629-supp-v1.zip]

**A**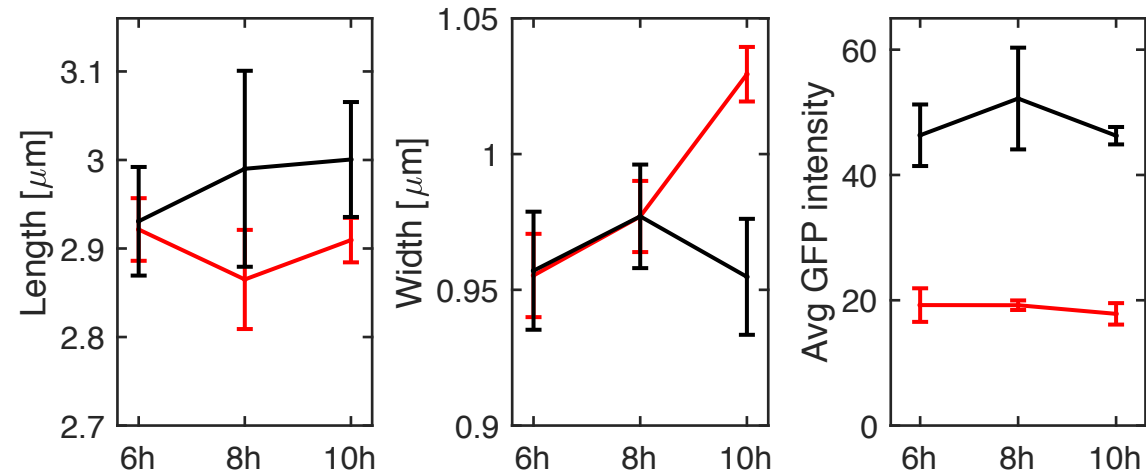**B**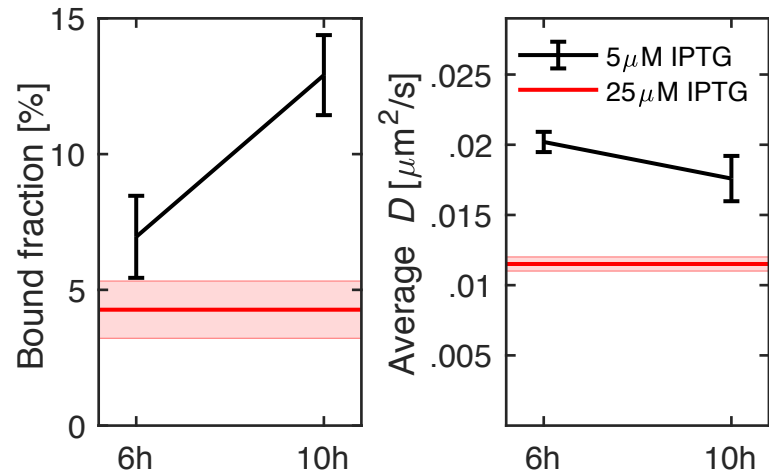

Supplement: supp [file elife-50629-supp-v1.zip]

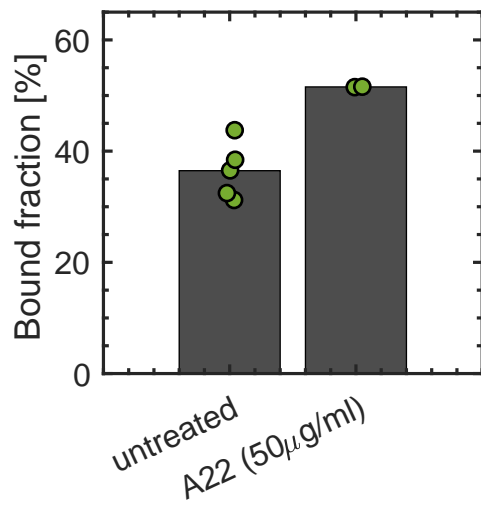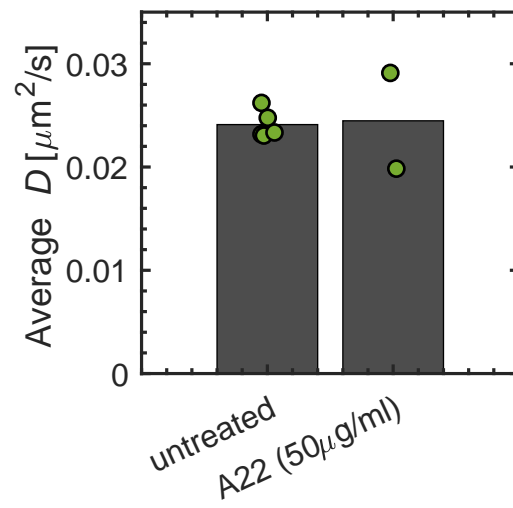

Supplement: supp [file elife-50629-supp-v1.zip]

**RodA native**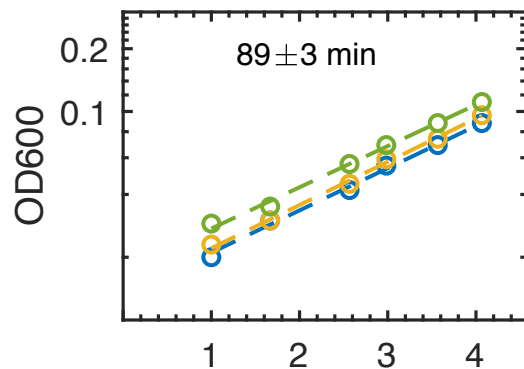**RodZ induced**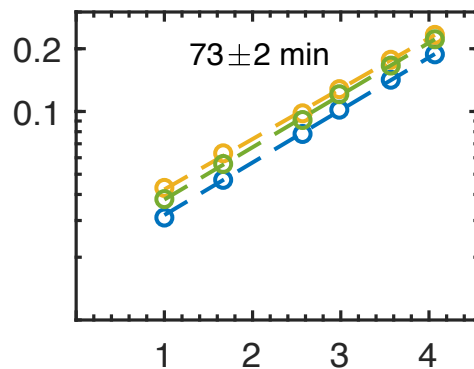**MreCD induced**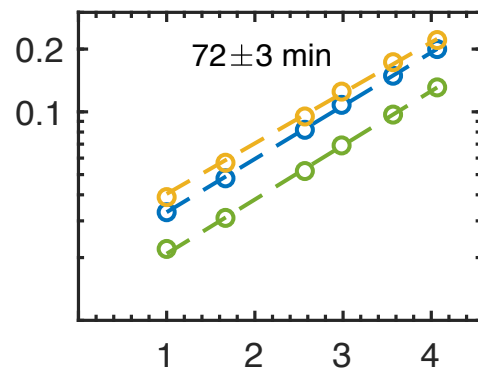**RodA repressed**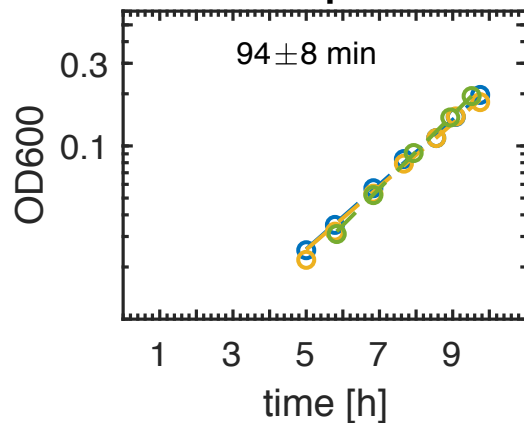**RodZ depleted**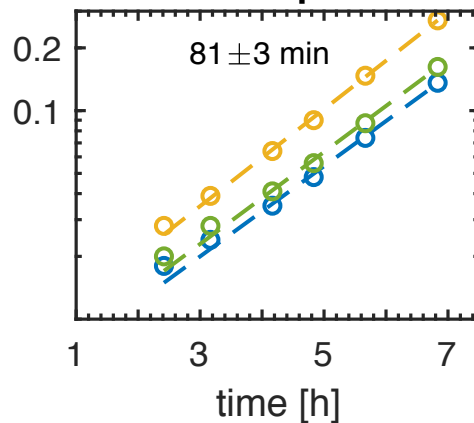**MreCD depleted**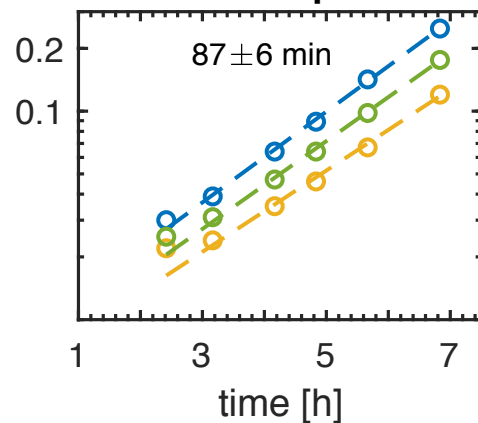

Supplement: supp [file elife-50629-supp-v1.zip]

**A**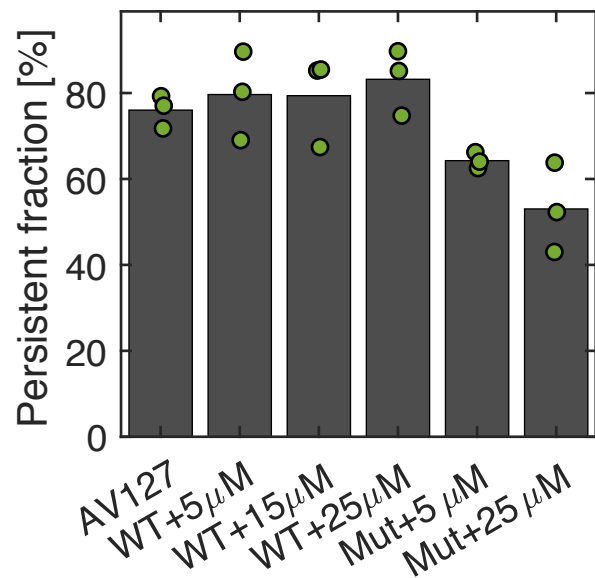**B**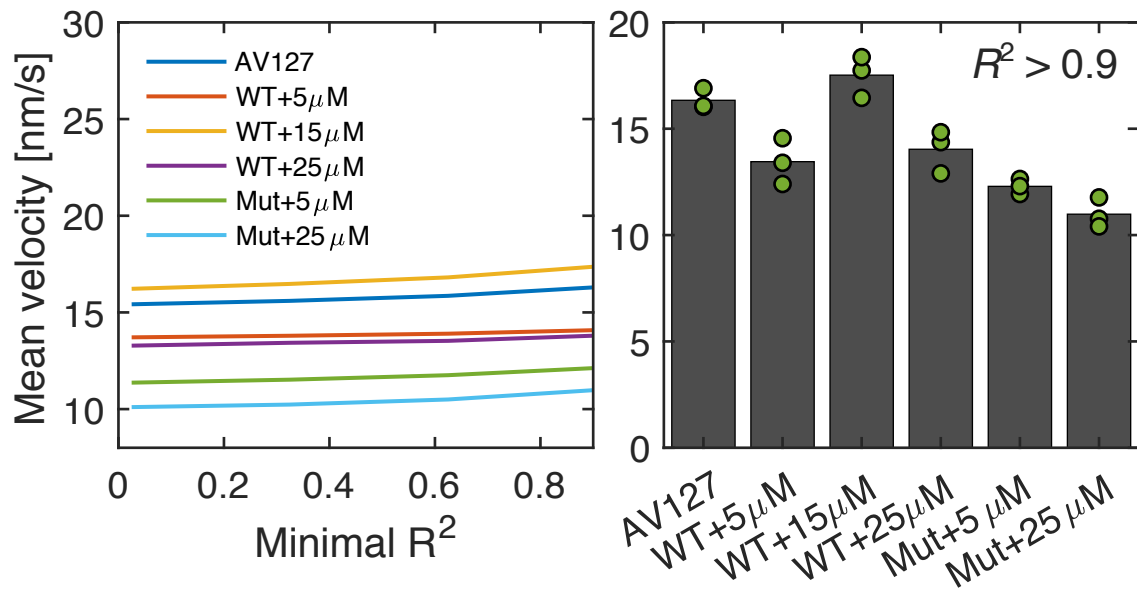

Supplement: supp [file elife-50629-supp-v1.zip]

A

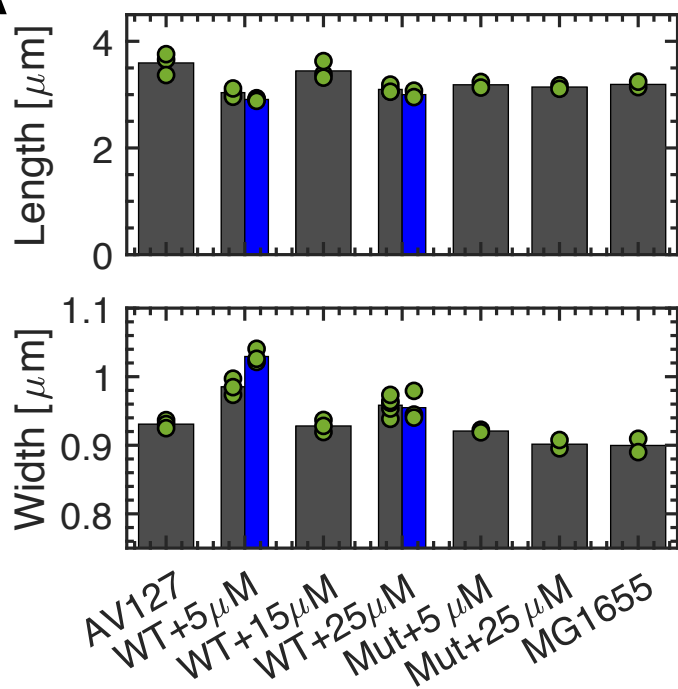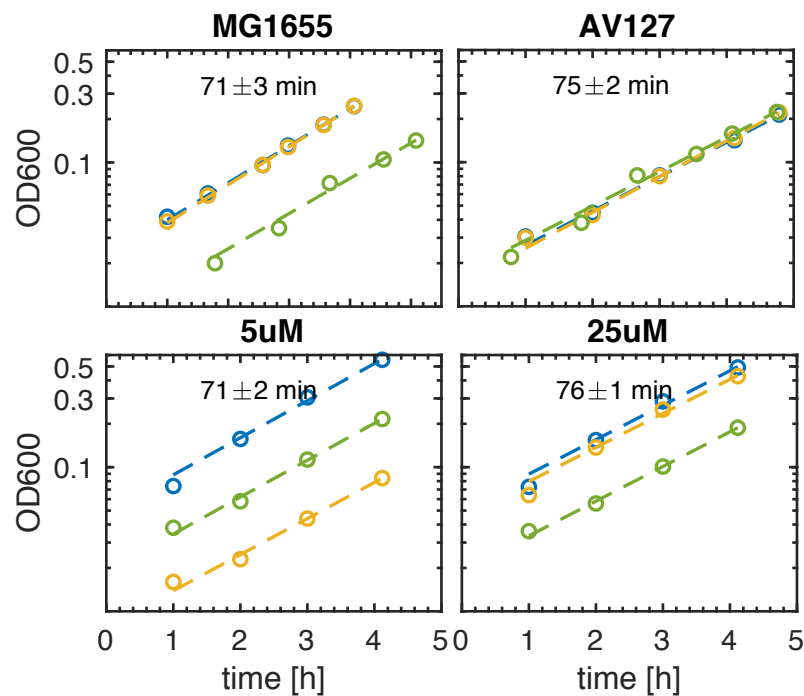

B

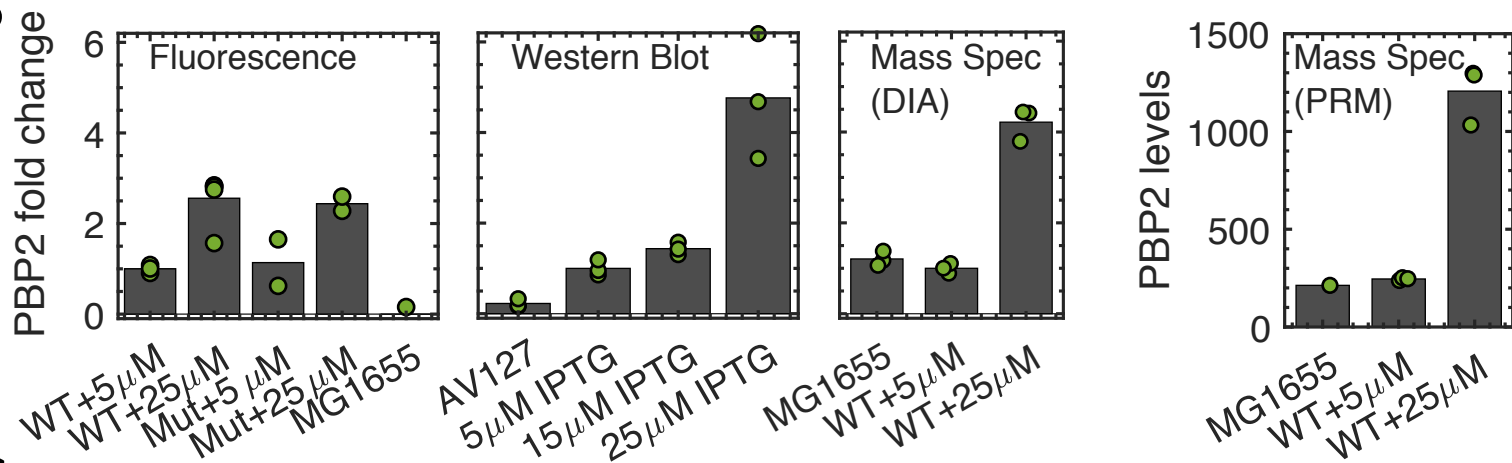

C

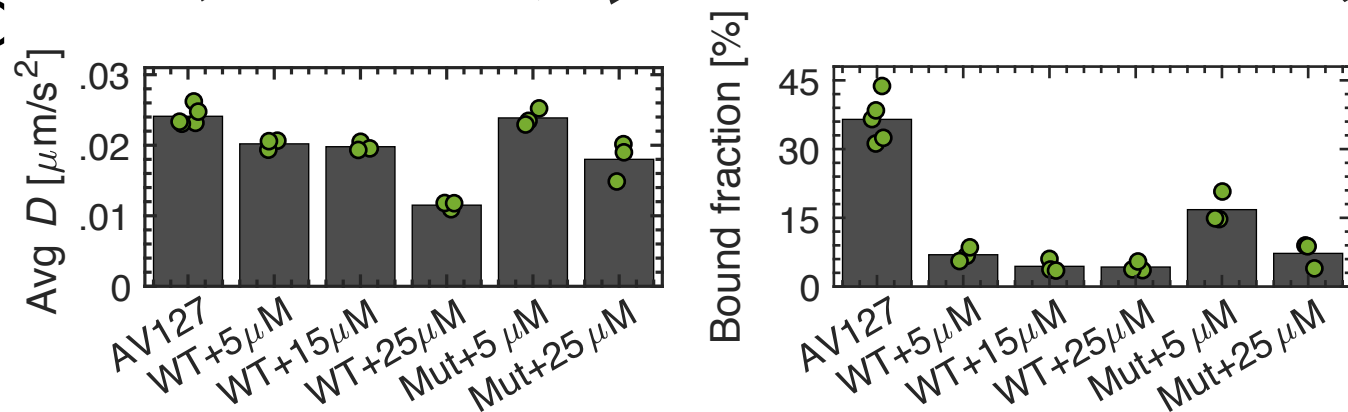

Supplement: supp [file elife-50629-supp-v1.zip]

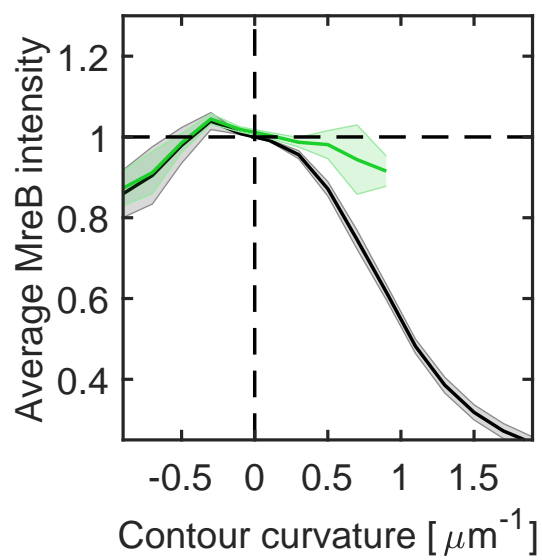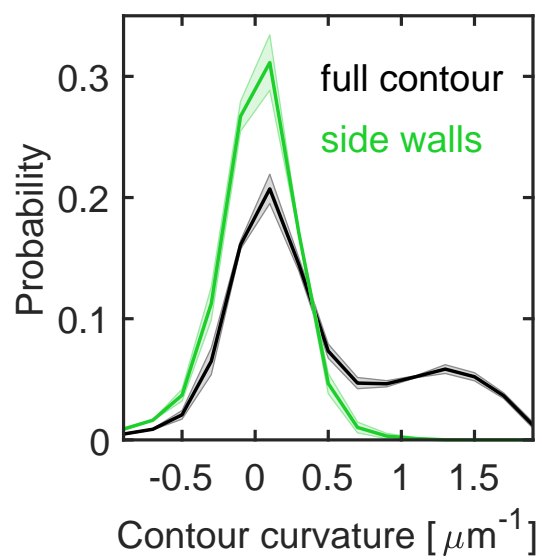

Supplement: supp [file elife-50629-supp-v1.zip]

A

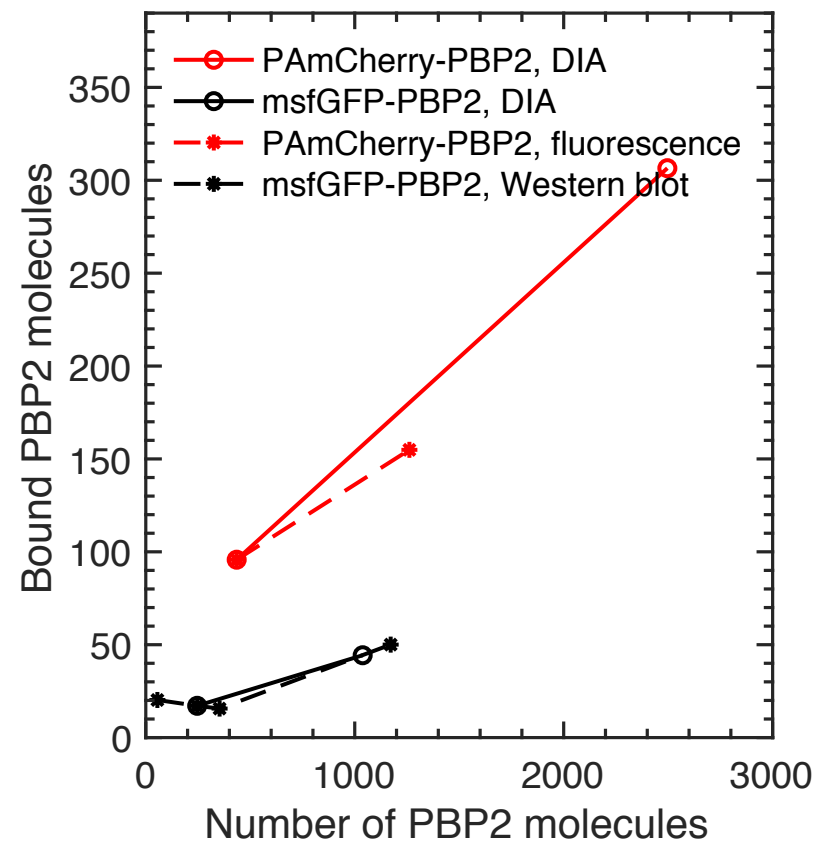

B

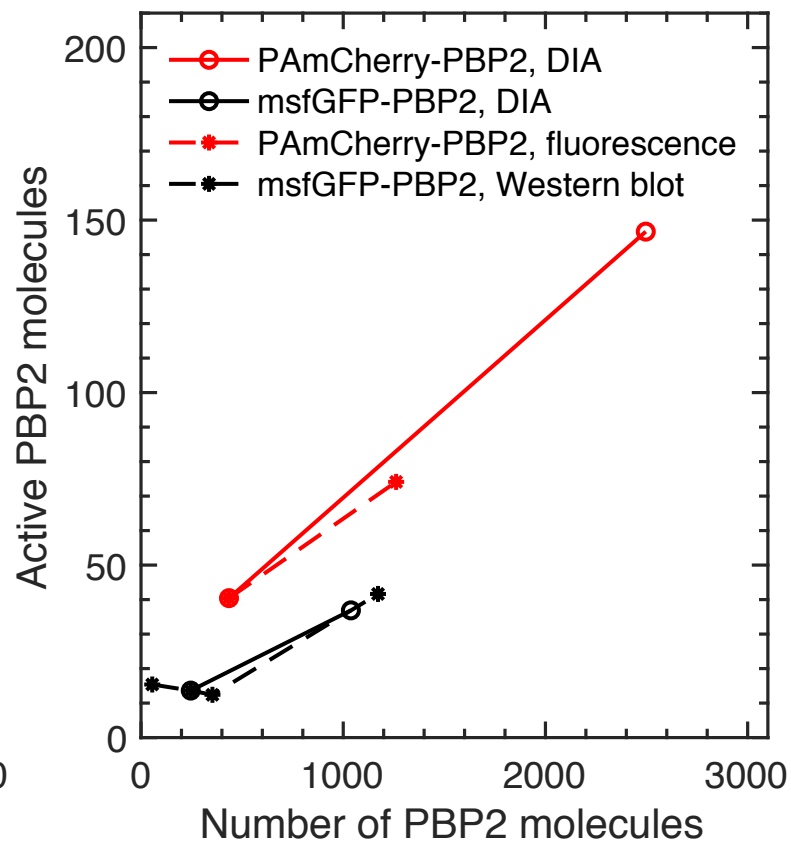

C

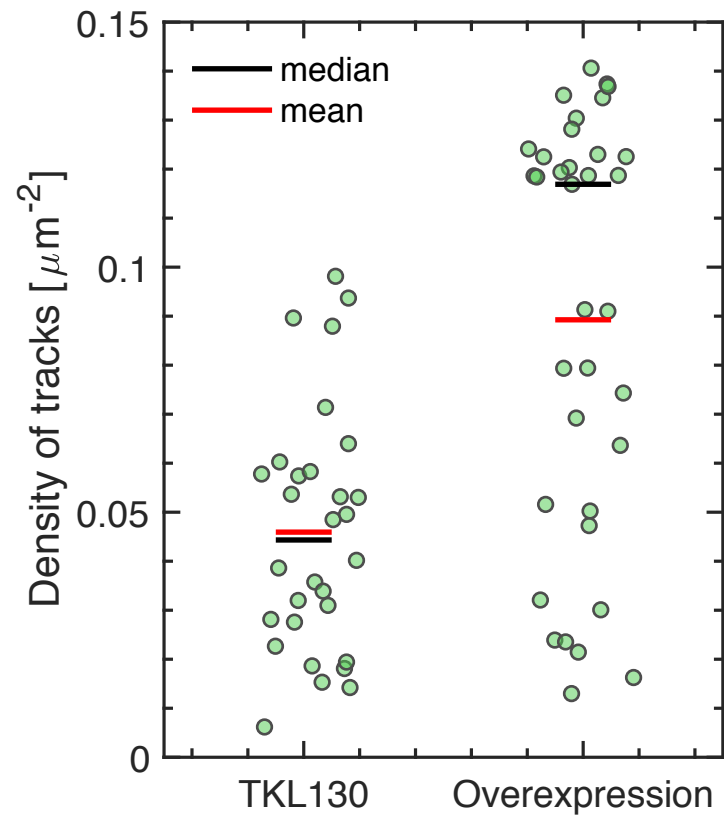

Supplement: supp [file elife-50629-supp-v1.zip]
